# Supplementary material for: RNA Sequencing in Hypoxia-Adapted T98G Glioblastoma Cells Provides Supportive Evidence for IRE1 as a Potential Therapeutic Target
Source: MDPI journal article supplement (doi:10.3390/genes14040841), 2023-03-31
Supplement: s1 [file s1]

Supplementary Table S5. T98G GBM Panther Gene Ontology Cell Components Analysis of DEGS Upregulated in Hypoxia Sorted by P-value

Analysis Type: PANTHER Overrepresentation Test (Released 20221013)

Annotation Version and Release Date: GO Ontology database DOI: 10.5281/zenodo.6799722 Released 2022-07-01

Analyzed List: upload\_1 (Homo sapiens)

Reference List: Homo sapiens (all genes in database)

Test Type: FISHER

Correction: BONFERRONI

Bonferroni count: 1581

| GO cellular component completeHomo sapiens - REFLIST (20589) | upload_1 (1156) | upload_1 (expected) | upload_1 (over/under) | upload_1 (fold Enrichment) | upload_1 (P-value) |          |
|--------------------------------------------------------------|-----------------|---------------------|-----------------------|----------------------------|--------------------|----------|
| Unclassified (UNCLASSIFIED)                                  | 1640            | 31                  | 92.08                 | -                          | .34                | 0.00E00  |
| endomembrane system (GO:0012505)                             | 4749            | 470                 | 266.64                | +                          | 1.76               | 8.30E-35 |
| endoplasmic reticulum (GO:0005783)                           | 2045            | 256                 | 114.82                | +                          | 2.23               | 8.70E-29 |
| vesicle (GO:0031982)                                         | 3975            | 393                 | 223.18                | +                          | 1.76               | 7.74E-27 |
| endoplasmic reticulum lumen (GO:0005788)                     | 314             | 81                  | 17.63                 | +                          | 4.59               | 4.22E-23 |
| cytoplasm (GO:0005737)                                       | 12097           | 853                 | 679.20                | +                          | 1.26               | 4.47E-22 |
| cytoplasmic vesicle (GO:0031410)                             | 2493            | 263                 | 139.97                | +                          | 1.88               | 2.80E-19 |
| intracellular vesicle (GO:0097708)                           | 2496            | 263                 | 140.14                | +                          | 1.88               | 4.21E-19 |
| extracellular space (GO:0005615)                             | 3430            | 329                 | 192.58                | +                          | 1.71               | 5.29E-19 |
| extracellular exosome (GO:0070062)                           | 2100            | 230                 | 117.91                | +                          | 1.95               | 4.37E-18 |
| extracellular vesicle (GO:1903561)                           | 2123            | 231                 | 119.20                | +                          | 1.94               | 7.01E-18 |
| extracellular organelle (GO:0043230)                         | 2124            | 231                 | 119.26                | +                          | 1.94               | 7.27E-18 |
| extracellular membrane organelle (GO:0065010)                | 2124            | 231                 | 119.26                | +                          | 1.94               | 7.27E-18 |
| extracellular region (GO:0005576)                            | 4396            | 382                 | 246.82                | +                          | 1.55               | 6.77E-16 |
| collagen-extracellular matrix (GO:0062023)                   | 434             | 81                  | 24.37                 | +                          | 3.32               | 1.77E-15 |
| extracellular matrix (GO:0031012)                            | 575             | 92                  | 32.28                 | +                          | 2.85               | 5.04E-14 |
| external encapsulating structure (GO:0030312)                | 576             | 92                  | 32.34                 | +                          | 2.84               | 5.55E-14 |
| focal adhesion (GO:0005925)                                  | 423             | 74                  | 23.75                 | +                          | 3.12               | 1.22E-12 |
| cell-substrate junction (GO:0030055)                         | 433             | 74                  | 24.31                 | +                          | 3.04               | 3.59E-12 |

|                                                   |       |      |         |   |      |          |
|---------------------------------------------------|-------|------|---------|---|------|----------|
| cellular anatomical entity (GO:0110165)           | 18802 | 1123 | 1055.67 | + | 1.06 | 6.87E-12 |
| intracellular anatomical structure (GO:0005622)   | 14945 | 955  | 839.11  | + | 1.14 | 1.19E-11 |
| organelle subcompartment (GO:0031984)             | 1501  | 161  | 84.28   | + | 1.91 | 7.17E-11 |
| cellular_component (GO:0005575)                   | 18949 | 1125 | 1063.92 | + | 1.06 | 3.08E-10 |
| anchoring junction (GO:0070161)                   | 1336  | 145  | 75.01   | + | 1.93 | 7.49E-10 |
| membrane (GO:0016020)                             | 9956  | 685  | 558.99  | + | 1.23 | 8.35E-10 |
| cell junction (GO:0030054)                        | 2136  | 203  | 119.93  | + | 1.69 | 1.55E-09 |
| endoplasmic reticulum membrane (GO:0005789)       | 1173  | 131  | 65.86   | + | 1.99 | 1.93E-09 |
| endoplasmic reticulum subcompartment (GO:0098827) | 1177  | 131  | 66.08   | + | 1.98 | 2.18E-09 |
| Golgi apparatus (GO:0005794)                      | 1659  | 167  | 93.15   | + | 1.79 | 3.06E-09 |
| nuclear-endoplasmic reticulum (GO:0042175)        | 1196  | 132  | 67.15   | + | 1.97 | 3.15E-09 |
| bounding membrane of organelle (GO:0098588)       | 2134  | 199  | 119.82  | + | 1.66 | 1.26E-08 |
| organelle (GO:0043226)                            | 14064 | 895  | 789.64  | + | 1.13 | 3.95E-08 |
| membrane-bounded organelle (GO:0043227)           | 13230 | 850  | 742.82  | + | 1.14 | 1.01E-07 |
| organelle membrane (GO:0031090)                   | 3688  | 299  | 207.07  | + | 1.44 | 1.17E-07 |
| secretory vesicle (GO:0099503)                    | 1051  | 113  | 59.01   | + | 1.91 | 6.42E-07 |
| intracellular organelle (GO:0043229)              | 13254 | 844  | 744.17  | + | 1.13 | 1.78E-06 |
| cytoplasmic vesicle membrane (GO:0030659)         | 1196  | 122  | 67.15   | + | 1.82 | 2.83E-06 |
| cell periphery (GO:0071944)                       | 6460  | 462  | 362.71  | + | 1.27 | 3.44E-06 |
| secretory granule (GO:0030141)                    | 879   | 97   | 49.35   | + | 1.97 | 3.47E-06 |
| basement membrane (GO:0005604)                    | 101   | 26   | 5.67    | + | 4.58 | 3.95E-06 |
| vesicle membrane (GO:0012506)                     | 1215  | 122  | 68.22   | + | 1.79 | 5.59E-06 |
| intracellular membrane organelle (GO:0043231)     | 12154 | 779  | 682.40  | + | 1.14 | 2.18E-05 |
| endoplasmic reticulum complex (GO:0140534)        | 128   | 27   | 7.19    | + | 3.76 | 7.40E-05 |
| vesicle lumen (GO:0031983)                        | 325   | 46   | 18.25   | + | 2.52 | 1.79E-04 |
| melanosome (GO:0042470)                           | 111   | 24   | 6.23    | + | 3.85 | 2.75E-04 |
| pigment granule (GO:0048770)                      | 111   | 24   | 6.23    | + | 3.85 | 2.75E-04 |
| COPII-coated ERGolgi transport (GO:0030134)       | 94    | 22   | 5.28    | + | 4.17 | 2.75E-04 |
| secretory granule lumen (GO:0034774)              | 320   | 45   | 17.97   | + | 2.50 | 2.80E-04 |

|                                                |     |    |       |   |      |          |
|------------------------------------------------|-----|----|-------|---|------|----------|
| cytoplasmic vesicle lumen (GO:0060205)         | 323 | 45 | 18.14 | + | 2.48 | 3.29E-04 |
| transport vesicle (GO:0030133)                 | 429 | 54 | 24.09 | + | 2.24 | 4.45E-04 |
| endoplasmic reticulum-Golgi (GO:0005793)       | 135 | 26 | 7.58  | + | 3.43 | 6.14E-04 |
| intrinsic component of organelle (GO:0031300)  | 428 | 53 | 24.03 | + | 2.21 | 8.03E-04 |
| integral component of organelle (GO:0031301)   | 398 | 49 | 22.35 | + | 2.19 | 2.76E-03 |
| lytic vacuole (GO:0000323)                     | 749 | 76 | 42.05 | + | 1.81 | 5.65E-03 |
| lysosome (GO:0005764)                          | 749 | 76 | 42.05 | + | 1.81 | 5.65E-03 |
| lysosomal lumen (GO:0043202)                   | 98  | 20 | 5.50  | + | 3.63 | 6.16E-03 |
| endocytic vesicle (GO:0030139)                 | 344 | 43 | 19.31 | + | 2.23 | 8.37E-03 |
| coated vesicle (GO:0030135)                    | 310 | 40 | 17.41 | + | 2.30 | 8.65E-03 |
| vacuolar lumen (GO:0005775)                    | 175 | 27 | 9.83  | + | 2.75 | 1.54E-02 |
| intrinsic component of ERmembrane (GO:0031227) | 177 | 27 | 9.94  | + | 2.72 | 1.85E-02 |
| vacuole (GO:0005773)                           | 845 | 81 | 47.44 | + | 1.71 | 1.91E-02 |
| ER-Golgi intermediate compartment (GO:0033116) | 81  | 17 | 4.55  | + | 3.74 | 2.34E-02 |
| actin cytoskeleton (GO:0015629)                | 510 | 55 | 28.63 | + | 1.92 | 2.41E-02 |
| Golgi membrane (GO:0000139)                    | 666 | 67 | 37.39 | + | 1.79 | 2.55E-02 |
| phagocytic vesicle (GO:0045335)                | 140 | 23 | 7.86  | + | 2.93 | 2.85E-02 |
| complex of collagen trimers (GO:0098644)       | 22  | 9  | 1.24  | + | 7.29 | 3.62E-02 |
| brush border (GO:0005903)                      | 105 | 19 | 5.90  | + | 3.22 | 4.69E-02 |
