# Supplementary material for: RNA Sequencing in Hypoxia-Adapted T98G Glioblastoma Cells Provides Supportive Evidence for IRE1 as a Potential Therapeutic Target
Source: MDPI journal article supplement (doi:10.3390/genes14040841), 2023-03-31
Supplement: s1 [file s1]

## Supplementary Table S6. T98G GBM Panther Gene Ontology Cell Components Analysis of DEGS Upregulated in Hypoxia Sorted by Enrichment

Analysis Type: PANTHER Overrepresentation Test (Released 20221013)

Annotation Version and Release Date: GO Ontology database DOI: 10.5281/zenodo.6799722 Released 2022-07-01

Analyzed List: upload\_1 (Homo sapiens)

Reference List: Homo sapiens (all genes in database)

Test Type: FISHER

Correction: BONFERRONI

Bonferroni count: 1581

| GO cellular component completeHomo sapiens -            | REFLIST (20589) | upload_1 (1156) | upload_1 (expected) | upload_1 (over/under) | upload_1 (fold Enrichment) | upload_1 (P-value) |
|---------------------------------------------------------|-----------------|-----------------|---------------------|-----------------------|----------------------------|--------------------|
| complex of collagen trimers (GO:0098644)                | 22              | 9               | 1.24                | +                     | 7.29                       | 3.62E-02           |
| endoplasmic reticulum lumen (GO:0005788)                | 314             | 81              | 17.63               | +                     | 4.59                       | 4.22E-23           |
| basement membrane (GO:0005604)                          | 101             | 26              | 5.67                | +                     | 4.58                       | 3.95E-06           |
| COPII-coated ER to Golgi transport vesicle (GO:0030134) | 94              | 22              | 5.28                | +                     | 4.17                       | 2.75E-04           |
| melanosome (GO:0042470)                                 | 111             | 24              | 6.23                | +                     | 3.85                       | 2.75E-04           |
| pigment granule (GO:0048770)                            | 111             | 24              | 6.23                | +                     | 3.85                       | 2.75E-04           |
| endoplasmic retic protein/contain cmplx (GO:0140534)    | 128             | 27              | 7.19                | +                     | 3.76                       | 7.40E-05           |
| endopl-retic-Golgi intermed cmptment memb (GO:0033116)  | 81              | 17              | 4.55                | +                     | 3.74                       | 2.34E-02           |
| lysosomal lumen (GO:0043202)                            | 98              | 20              | 5.50                | +                     | 3.63                       | 6.16E-03           |
| endopl-retic-Golgi intermed compartment (GO:0005793)    | 135             | 26              | 7.58                | +                     | 3.43                       | 6.14E-04           |
| collagen-containing extracellular matrix (GO:0062023)   | 434             | 81              | 24.37               | +                     | 3.32                       | 1.77E-15           |
| brush border (GO:0005903)                               | 105             | 19              | 5.90                | +                     | 3.22                       | 4.69E-02           |
| focal adhesion (GO:0005925)                             | 423             | 74              | 23.75               | +                     | 3.12                       | 1.22E-12           |
| cell-substrate junction (GO:0030055)                    | 433             | 74              | 24.31               | +                     | 3.04                       | 3.59E-12           |
| phagocytic vesicle (GO:0045335)                         | 140             | 23              | 7.86                | +                     | 2.93                       | 2.85E-02           |
| extracellular matrix (GO:0031012)                       | 575             | 92              | 32.28               | +                     | 2.85                       | 5.04E-14           |

|                                                          |      |     |        |   |      |          |
|----------------------------------------------------------|------|-----|--------|---|------|----------|
| external encapsulating structure (GO:0030312)            | 576  | 92  | 32.34  | + | 2.84 | 5.55E-14 |
| vacuolar lumen (GO:0005775)                              | 175  | 27  | 9.83   | + | 2.75 | 1.54E-02 |
| intrinsic component endoplasm retic memb (GO:0031227)    | 177  | 27  | 9.94   | + | 2.72 | 1.85E-02 |
| vesicle lumen (GO:0031983)                               | 325  | 46  | 18.25  | + | 2.52 | 1.79E-04 |
| secretory granule lumen (GO:0034774)                     | 320  | 45  | 17.97  | + | 2.50 | 2.80E-04 |
| cytoplasmic vesicle lumen (GO:0060205)                   | 323  | 45  | 18.14  | + | 2.48 | 3.29E-04 |
| coated vesicle (GO:0030135)                              | 310  | 40  | 17.41  | + | 2.30 | 8.65E-03 |
| transport vesicle (GO:0030133)                           | 429  | 54  | 24.09  | + | 2.24 | 4.45E-04 |
| endoplasmic reticulum (GO:0005783)                       | 2045 | 256 | 114.82 | + | 2.23 | 8.70E-29 |
| endocytic vesicle (GO:0030139)                           | 344  | 43  | 19.31  | + | 2.23 | 8.37E-03 |
| intrinsic component of organelle membrane (GO:0031300)   | 428  | 53  | 24.03  | + | 2.21 | 8.03E-04 |
| integral component of organelle membrane (GO:0031301)    | 398  | 49  | 22.35  | + | 2.19 | 2.76E-03 |
| endoplasmic reticulum membrane (GO:0005789)              | 1173 | 131 | 65.86  | + | 1.99 | 1.93E-09 |
| endoplasmic reticulum subcompartment (GO:0098827)        | 1177 | 131 | 66.08  | + | 1.98 | 2.18E-09 |
| nuc-outer-memb-endoplasm-reticu-memb network(GO:0042175) | 1196 | 132 | 67.15  | + | 1.97 | 3.15E-09 |
| secretory granule (GO:0030141)                           | 879  | 97  | 49.35  | + | 1.97 | 3.47E-06 |
| extracellular exosome (GO:0070062)                       | 2100 | 230 | 117.91 | + | 1.95 | 4.37E-18 |
| extracellular vesicle (GO:1903561)                       | 2123 | 231 | 119.20 | + | 1.94 | 7.01E-18 |
| extracellular organelle (GO:0043230)                     | 2124 | 231 | 119.26 | + | 1.94 | 7.27E-18 |
| extracellular membrane-bounded organelle (GO:0065010)    | 2124 | 231 | 119.26 | + | 1.94 | 7.27E-18 |
| anchoring junction (GO:0070161)                          | 1336 | 145 | 75.01  | + | 1.93 | 7.49E-10 |
| actin cytoskeleton (GO:0015629)                          | 510  | 55  | 28.63  | + | 1.92 | 2.41E-02 |
| secretory vesicle (GO:0099503)                           | 1051 | 113 | 59.01  | + | 1.91 | 6.42E-07 |
| organelle subcompartment (GO:0031984)                    | 1501 | 161 | 84.28  | + | 1.91 | 7.17E-11 |
| cytoplasmic vesicle (GO:0031410)                         | 2493 | 263 | 139.97 | + | 1.88 | 2.80E-19 |
| intracellular vesicle (GO:0097708)                       | 2496 | 263 | 140.14 | + | 1.88 | 4.21E-19 |
| cytoplasmic vesicle membrane (GO:0030659)                | 1196 | 122 | 67.15  | + | 1.82 | 2.83E-06 |
| lytic vacuole (GO:0000323)                               | 749  | 76  | 42.05  | + | 1.81 | 5.65E-03 |
| lysosome (GO:0005764)                                    | 749  | 76  | 42.05  | + | 1.81 | 5.65E-03 |

|                                                       |       |      |         |   |      |          |
|-------------------------------------------------------|-------|------|---------|---|------|----------|
| Golgi apparatus (GO:0005794)                          | 1659  | 167  | 93.15   | + | 1.79 | 3.06E-09 |
| Golgi membrane (GO:0000139)                           | 666   | 67   | 37.39   | + | 1.79 | 2.55E-02 |
| vesicle membrane (GO:0012506)                         | 1215  | 122  | 68.22   | + | 1.79 | 5.59E-06 |
| endomembrane system (GO:0012505)                      | 4749  | 470  | 266.64  | + | 1.76 | 8.30E-35 |
| vesicle (GO:0031982)                                  | 3975  | 393  | 223.18  | + | 1.76 | 7.74E-27 |
| extracellular space (GO:0005615)                      | 3430  | 329  | 192.58  | + | 1.71 | 5.29E-19 |
| vacuole (GO:0005773)                                  | 845   | 81   | 47.44   | + | 1.71 | 1.91E-02 |
| cell junction (GO:0030054)                            | 2136  | 203  | 119.93  | + | 1.69 | 1.55E-09 |
| bounding membrane of organelle (GO:0098588)           | 2134  | 199  | 119.82  | + | 1.66 | 1.26E-08 |
| extracellular region (GO:0005576)                     | 4396  | 382  | 246.82  | + | 1.55 | 6.77E-16 |
| organelle membrane (GO:0031090)                       | 3688  | 299  | 207.07  | + | 1.44 | 1.17E-07 |
| cell periphery (GO:0071944)                           | 6460  | 462  | 362.71  | + | 1.27 | 3.44E-06 |
| cytoplasm (GO:0005737)                                | 12097 | 853  | 679.20  | + | 1.26 | 4.47E-22 |
| membrane (GO:0016020)                                 | 9956  | 685  | 558.99  | + | 1.23 | 8.35E-10 |
| membrane-bounded organelle (GO:0043227)               | 13230 | 850  | 742.82  | + | 1.14 | 1.01E-07 |
| intracellular membrane-bounded organelle (GO:0043231) | 12154 | 779  | 682.40  | + | 1.14 | 2.18E-05 |
| intracellular anatomical structure (GO:0005622)       | 14945 | 955  | 839.11  | + | 1.14 | 1.19E-11 |
| intracellular organelle (GO:0043229)                  | 13254 | 844  | 744.17  | + | 1.13 | 1.78E-06 |
| organelle (GO:0043226)                                | 14064 | 895  | 789.64  | + | 1.13 | 3.95E-08 |
| cellular anatomical entity (GO:0110165)               | 18802 | 1123 | 1055.67 | + | 1.06 | 6.87E-12 |
| cellular_component (GO:0005575)                       | 18949 | 1125 | 1063.92 | + | 1.06 | 3.08E-10 |
| Unclassified (UNCLASSIFIED)                           | 1640  | 31   | 92.08   | - | .34  | 0.00E00  |
