# Supplementary material for: RNA Sequencing in Hypoxia-Adapted T98G Glioblastoma Cells Provides Supportive Evidence for IRE1 as a Potential Therapeutic Target
Source: MDPI journal article supplement (doi:10.3390/genes14040841), 2023-03-31
Supplement: s1 [file s1]

# Supplementary Table S7. T98G GBM Panther Gene Ontology Reactome Analysis of DEGS Upregulated in Hypoxia Sorted by P-value

Analysis Type: PANTHER Overrepresentation Test (Released 20221013)

Annotation Version and Release Date: Reactome version 77 Released 2021-10-01

Analyzed List: upload\_1 (Homo sapiens)

Reference List: Homo sapiens (all genes in database)

Test Type: FISHER

Correction: BONFERRONI

Bonferroni count: 2229

| Reactome pathways                               | Homo sapiens - REFLIST (20589) | upload_1 (1156) | upload_1 (expected) | upload_1 (over/under) | upload_1 (fold Enrichment) | upload_1 (P-value) |
|-------------------------------------------------|--------------------------------|-----------------|---------------------|-----------------------|----------------------------|--------------------|
| Unclassified (UNCLASSIFIED)                     | 10082                          | 435             | 566.07              | -                     | .77                        | 0.00E00            |
| Extracellular matrix (R-HSA-1474244)            | 299                            | 69              | 16.79               | +                     | 4.11                       | 6.27E-17           |
| Collagen formation (R-HSA-1474290)              | 89                             | 33              | 5.00                | +                     | 6.60                       | 8.93E-12           |
| Collagen biosyn mod enzymes (R-HSA-1650814)     | 67                             | 25              | 3.76                | +                     | 6.65                       | 1.70E-08           |
| Post-translational protein phos (R-HSA-8957275) | 107                            | 28              | 6.01                | +                     | 4.66                       | 9.97E-07           |
| Reg IGF trans/uptake (IGFBPs)(R-HSA-381426)     | 124                            | 30              | 6.96                | +                     | 4.31                       | 1.20E-06           |
| Assemb collagen/multimeric (R-HSA-2022090)      | 60                             | 20              | 3.37                | +                     | 5.94                       | 1.03E-05           |
| Deg of extracellular matrix (R-HSA-1474228)     | 140                            | 28              | 7.86                | +                     | 3.56                       | 1.57E-04           |
| Asparagine N-linked glycosy (R-HSA-446203)      | 305                            | 44              | 17.12               | +                     | 2.57                       | 2.31E-04           |
| Integrin cell surface interact (R-HSA-216083)   | 84                             | 21              | 4.72                | +                     | 4.45                       | 2.86E-04           |
| Metabolism of carbohydrates (R-HSA-71387)       | 286                            | 42              | 16.06               | +                     | 2.62                       | 3.10E-04           |
| Unfolded Protein Response (R-HSA-381119)        | 91                             | 21              | 5.11                | +                     | 4.11                       | 8.96E-04           |
| IRE1alpha activates chaperones (R-HSA-381070)   | 49                             | 15              | 2.75                | +                     | 5.45                       | 2.13E-03           |
| Neutrophil degranulation (R-HSA-6798695)        | 477                            | 56              | 26.78               | +                     | 2.09                       | 2.58E-03           |
| Platelet degranulation (R-HSA-114608)           | 127                            | 24              | 7.13                | +                     | 3.37                       | 3.22E-03           |
| Hemostasis (R-HSA-109582)                       | 670                            | 71              | 37.62               | +                     | 1.89                       | 3.49E-03           |
| Non-integrin ECM interact (R-HSA-3000171)       | 59                             | 16              | 3.31                | +                     | 4.83                       | 3.59E-03           |
| ECM proteoglycans (R-HSA-3000178)               | 76                             | 18              | 4.27                | +                     | 4.22                       | 4.33E-03           |

|                                                  |     |    |       |   |      |          |
|--------------------------------------------------|-----|----|-------|---|------|----------|
| Antigen Present :class I MHC (R-HSA-983170)      | 26  | 11 | 1.46  | + | 7.54 | 4.85E-03 |
| Elevated platelet cytosol Ca2+ (R-HSA-76005)     | 132 | 24 | 7.41  | + | 3.24 | 5.82E-03 |
| XBP1(S) active chaperone genes (R-HSA-381038)    | 47  | 14 | 2.64  | + | 5.31 | 6.38E-03 |
| Collagen degradation (R-HSA-1442490)             | 64  | 16 | 3.59  | + | 4.45 | 8.82E-03 |
| Platelet activation, aggregation (R-HSA-76002)   | 260 | 36 | 14.60 | + | 2.47 | 1.07E-02 |
| Collagen chain trimerization (R-HSA-8948216)     | 44  | 13 | 2.47  | + | 5.26 | 1.55E-02 |
| N-glycan/ER/Calnexin/Calreticulin (R-HSA-532668) | 35  | 11 | 1.97  | + | 5.60 | 4.87E-02 |
