# Supplementary material for: RNA Sequencing in Hypoxia-Adapted T98G Glioblastoma Cells Provides Supportive Evidence for IRE1 as a Potential Therapeutic Target
Source: MDPI journal article supplement (doi:10.3390/genes14040841), 2023-03-31
Supplement: s1 [file s1]

Supplementary Table S1. Quality Control measures of the six samples used for RNAsequencing.

| Sample | # total reads | # mapped reads | % mapped reads | # mapped genes |
|--------|---------------|----------------|----------------|----------------|
| N1     | 35,959,579    | 30,218,469     | 84.03          | 32,216         |
| N2     | 32,639,773    | 27,385,381     | 83.90          | 31,887         |
| N3     | 29,889,421    | 25,561,719     | 85.52          | 32,001         |
| H1     | 33,695,102    | 28,650,800     | 85.03          | 31,593         |
| H2     | 40,195,699    | 33,185,089     | 82.56          | 32,629         |
| H3     | 34,993,151    | 29,681,173     | 84.82          | 31,998         |
