# Supplementary material for: RNA Sequencing in Hypoxia-Adapted T98G Glioblastoma Cells Provides Supportive Evidence for IRE1 as a Potential Therapeutic Target
Source: MDPI journal article supplement (doi:10.3390/genes14040841), 2023-03-31
Supplement: s1 [file s1]

# Supplementary Table S8. T98G GBM Panther Gene Ontology Biological Processes Analysis of DEGS Upregulated in Normoxia Sorted by P-value.

Analysis Type: PANTHER Overrepresentation Test (Released 20221013)

Annotation Version and Release Date: GO Ontology database DOI: 10.5281/zenodo.6799722 Released 2022-07-01

Analyzed List: upload\_1 (Homo sapiens)

Reference List: Homo sapiens (all genes in database)

Test Type: FISHER

Correction: BONFERRONI

Bonferroni count: 9290

| GO biological process complete                             | Homo sapiens - | REFLIST (20589) | upload_1 (1340) | upload_1 (expected) | upload_1 (over/under) | upload_1 (fold Enrichment) | upload_1 (P-value) |
|------------------------------------------------------------|----------------|-----------------|-----------------|---------------------|-----------------------|----------------------------|--------------------|
| Unclassified (UNCLASSIFIED)                                |                | 2725            | 69              | 177.35              | -                     | .39                        | 0.00E00            |
| cellular nitrogen compound metabolic process (GO:0034641)  |                | 3573            | 537             | 232.54              | +                     | 2.31                       | 6.12E-75           |
| nucleobase-containing compd metabolic process (GO:0006139) |                | 2825            | 467             | 183.86              | +                     | 2.54                       | 4.74E-74           |
| heterocycle metabolic process (GO:0046483)                 |                | 2999            | 483             | 195.18              | +                     | 2.47                       | 4.79E-74           |
| cellular aromatic compound metabolic process (GO:0006725)  |                | 3050            | 487             | 198.50              | +                     | 2.45                       | 1.15E-73           |
| nucleic acid metabolic process (GO:0090304)                |                | 2276            | 408             | 148.13              | +                     | 2.75                       | 1.43E-71           |
| organic cyclic compound metabolic process (GO:1901360)     |                | 3292            | 497             | 214.25              | +                     | 2.32                       | 3.97E-68           |
| nitrogen compound metabolic process (GO:0006807)           |                | 6710            | 766             | 436.71              | +                     | 1.75                       | 5.44E-67           |
| cellular metabolic process (GO:0044237)                    |                | 6606            | 747             | 429.94              | +                     | 1.74                       | 1.87E-62           |
| primary metabolic process (GO:0044238)                     |                | 7228            | 782             | 470.42              | +                     | 1.66                       | 6.79E-59           |
| organic substance metabolic process (GO:0071704)           |                | 7697            | 811             | 500.95              | +                     | 1.62                       | 1.39E-57           |
| metabolic process (GO:0008152)                             |                | 8131            | 840             | 529.19              | +                     | 1.59                       | 1.56E-57           |
| macromolecule metabolic process (GO:0043170)               |                | 5941            | 680             | 386.66              | +                     | 1.76                       | 3.47E-55           |
| DNA metabolic process (GO:0006259)                         |                | 794             | 178             | 51.68               | +                     | 3.44                       | 1.55E-37           |
| cellular macromolecule metabolic process (GO:0044260)      |                | 2518            | 342             | 163.88              | +                     | 2.09                       | 3.80E-33           |
| RNA metabolic process (GO:0016070)                         |                | 1635            | 253             | 106.41              | +                     | 2.38                       | 1.56E-30           |
| gene expression (GO:0010467)                               |                | 2314            | 316             | 150.60              | +                     | 2.10                       | 2.32E-30           |
| cell cycle (GO:0007049)                                    |                | 1249            | 213             | 81.29               | +                     | 2.62                       | 3.87E-30           |
| DNA replication (GO:0006260)                               |                | 205             | 82              | 13.34               | +                     | 6.15                       | 2.80E-29           |
| RNA processing (GO:0006396)                                |                | 868             | 169             | 56.49               | +                     | 2.99                       | 7.87E-29           |

|                                                                |       |      |         |   |      |          |
|----------------------------------------------------------------|-------|------|---------|---|------|----------|
| chromosome organization (GO:0051276)                           | 444   | 115  | 28.90   | + | 3.98 | 1.47E-27 |
| cellular response to DNA damage stimulus (GO:0006974)          | 756   | 150  | 49.20   | + | 3.05 | 6.94E-26 |
| cellular process (GO:0009987)                                  | 15044 | 1153 | 979.11  | + | 1.18 | 1.17E-24 |
| DNA repair (GO:0006281)                                        | 508   | 117  | 33.06   | + | 3.54 | 3.43E-24 |
| DNA-templated DNA replication (GO:0006261)                     | 139   | 62   | 9.05    | + | 6.85 | 1.80E-23 |
| cell cycle process (GO:0022402)                                | 841   | 153  | 54.74   | + | 2.80 | 5.98E-23 |
| mitotic cell cycle (GO:0000278)                                | 627   | 128  | 40.81   | + | 3.14 | 1.57E-22 |
| regulation of DNA metabolic process (GO:0051052)               | 541   | 115  | 35.21   | + | 3.27 | 3.64E-21 |
| cellular response to stress (GO:0033554)                       | 1599  | 220  | 104.07  | + | 2.11 | 9.55E-20 |
| mitotic cell cycle process (GO:1903047)                        | 533   | 111  | 34.69   | + | 3.20 | 1.07E-19 |
| regulation of cell cycle (GO:0051726)                          | 1122  | 174  | 73.02   | + | 2.38 | 1.41E-19 |
| ncRNA metabolic process (GO:0034660)                           | 536   | 109  | 34.88   | + | 3.12 | 1.40E-18 |
| regulation of cell cycle process (GO:0010564)                  | 715   | 129  | 46.53   | + | 2.77 | 1.66E-18 |
| ribonucleoprotein complex biogenesis (GO:0022613)              | 449   | 98   | 29.22   | + | 3.35 | 2.79E-18 |
| biological_process (GO:0008150)                                | 17864 | 1271 | 1162.65 | + | 1.09 | 2.14E-17 |
| cellular component organization or biogenesis (GO:0071840)     | 5727  | 537  | 372.73  | + | 1.44 | 1.06E-16 |
| double-strand break repair (GO:0006302)                        | 203   | 62   | 13.21   | + | 4.69 | 1.80E-16 |
| ncRNA processing (GO:0034470)                                  | 413   | 88   | 26.88   | + | 3.27 | 1.56E-15 |
| positive regulation of DNA metabolic process (GO:0051054)      | 305   | 74   | 19.85   | + | 3.73 | 2.80E-15 |
| regulation of chromosome organization (GO:0033044)             | 252   | 66   | 16.40   | + | 4.02 | 9.15E-15 |
| cellular nitrogen compound biosynthetic process (GO:0044271)   | 1588  | 202  | 103.35  | + | 1.95 | 4.14E-14 |
| regulation of cell cycle phase transition (GO:1901987)         | 431   | 87   | 28.05   | + | 3.10 | 4.70E-14 |
| protein-containing complex organization (GO:0043933)           | 1423  | 186  | 92.61   | + | 2.01 | 6.85E-14 |
| cellular component biogenesis (GO:0044085)                     | 2633  | 289  | 171.36  | + | 1.69 | 9.13E-14 |
| G protein-coupled receptor signaling pathway (GO:0007186)      | 1223  | 17   | 79.60   | - | .21  | 4.37E-13 |
| regulation of DNA replication (GO:0006275)                     | 136   | 46   | 8.85    | + | 5.20 | 6.33E-13 |
| ribosome biogenesis (GO:0042254)                               | 303   | 69   | 19.72   | + | 3.50 | 7.72E-13 |
| cell division (GO:0051301)                                     | 514   | 92   | 33.45   | + | 2.75 | 4.07E-12 |
| regulation of mitotic cell cycle phase transition (GO:1901990) | 332   | 71   | 21.61   | + | 3.29 | 4.59E-12 |

|                                                                 |      |     |        |   |       |          |  |
|-----------------------------------------------------------------|------|-----|--------|---|-------|----------|--|
| DNA recombination (GO:0006310)                                  | 245  | 60  | 15.95  | + | 3.76  | 4.92E-12 |  |
| organelle organization (GO:0006996)                             | 3026 | 312 | 196.94 | + | 1.58  | 9.98E-12 |  |
| mRNA metabolic process (GO:0016071)                             | 607  | 101 | 39.51  | + | 2.56  | 1.29E-11 |  |
| RNA splicing (GO:0008380)                                       | 368  | 74  | 23.95  | + | 3.09  | 1.84E-11 |  |
| chromosome segregation (GO:0007059)                             | 291  | 64  | 18.94  | + | 3.38  | 4.24E-11 |  |
| cellular biosynthetic process (GO:0044249)                      | 2464 | 264 | 160.37 | + | 1.65  | 6.25E-11 |  |
| organonitrogen compound metabolic process (GO:1901564)          | 5013 | 458 | 326.26 | + | 1.40  | 6.36E-11 |  |
| protein-containing complex assembly (GO:0065003)                | 1270 | 162 | 82.66  | + | 1.96  | 9.03E-11 |  |
| mRNA processing (GO:0006397)                                    | 451  | 82  | 29.35  | + | 2.79  | 9.31E-11 |  |
| regulation of response to DNA damage stimulus (GO:2001020)      | 314  | 65  | 20.44  | + | 3.18  | 3.03E-10 |  |
| regulation of mitotic cell cycle (GO:0007346)                   | 493  | 85  | 32.09  | + | 2.65  | 3.78E-10 |  |
| DNA geometric change (GO:0032392)                               | 98   | 35  | 6.38   | + | 5.49  | 8.76E-10 |  |
| organic substance biosynthetic process (GO:1901576)             | 2534 | 264 | 164.92 | + | 1.60  | 1.26E-09 |  |
| biosynthetic process (GO:0009058)                               | 2603 | 269 | 169.41 | + | 1.59  | 1.71E-09 |  |
| negative regulation of cell cycle process (GO:0010948)          | 272  | 58  | 17.70  | + | 3.28  | 2.54E-09 |  |
| recombinational repair (GO:0000725)                             | 117  | 37  | 7.61   | + | 4.86  | 3.70E-09 |  |
| cellular component organization (GO:0016043)                    | 5523 | 484 | 359.46 | + | 1.35  | 5.64E-09 |  |
| rRNA metabolic process (GO:0016072)                             | 254  | 55  | 16.53  | + | 3.33  | 6.21E-09 |  |
| dbl-strd break repair homologous recombination (GO:0000724)     | 113  | 36  | 7.35   | + | 4.90  | 6.41E-09 |  |
| DNA conformation change (GO:0071103)                            | 107  | 35  | 6.96   | + | 5.03  | 7.13E-09 |  |
| negative regulation of cell cycle phase transition (GO:1901988) | 224  | 51  | 14.58  | + | 3.50  | 8.49E-09 |  |
| cell cycle checkpoint signaling (GO:0000075)                    | 157  | 42  | 10.22  | + | 4.11  | 1.06E-08 |  |
| nuclear chromosome segregation (GO:0098813)                     | 234  | 52  | 15.23  | + | 3.41  | 1.13E-08 |  |
| mRNA splicing, via spliceosome (GO:0000398)                     | 243  | 53  | 15.82  | + | 3.35  | 1.28E-08 |  |
| RNA splicing transester rxn adenosine nucleophile (GO:0000377)  | 243  | 53  | 15.82  | + | 3.35  | 1.28E-08 |  |
| tRNA metabolic process (GO:0006399)                             | 196  | 47  | 12.76  | + | 3.68  | 1.39E-08 |  |
| regulation of nitrogen compound metabolic process (GO:0051171)  | 5709 | 495 | 371.56 | + | 1.33  | 1.49E-08 |  |
| detect chemical stimulus sensory perception (GO:0050907)        | 489  | 1   | 31.83  | - | .03   | 2.04E-08 |  |
| DNA replication initiation (GO:0006270)                         | 29   | 20  | 1.89   | + | 10.60 | 2.19E-08 |  |

|                                                              |      |     |        |   |      |          |
|--------------------------------------------------------------|------|-----|--------|---|------|----------|
| RNA splicing, via transesterification reactions (GO:0000375) | 247  | 53  | 16.08  | + | 3.30 | 2.21E-08 |
| Reg nucleobase-contain cmpd metabolic process (GO:0019219)   | 4067 | 375 | 264.69 | + | 1.42 | 2.30E-08 |
| rRNA processing (GO:0006364)                                 | 223  | 50  | 14.51  | + | 3.45 | 2.31E-08 |
| regulation of primary metabolic process (GO:0080090)         | 5872 | 505 | 382.17 | + | 1.32 | 2.84E-08 |
| positive regulation of cell cycle process (GO:0090068)       | 251  | 53  | 16.34  | + | 3.24 | 3.76E-08 |
| nervous system process (GO:0050877)                          | 1465 | 36  | 95.35  | - | .38  | 3.97E-08 |
| organelle fission (GO:0048285)                               | 349  | 64  | 22.71  | + | 2.82 | 5.26E-08 |
| nuclear division (GO:0000280)                                | 323  | 61  | 21.02  | + | 2.90 | 5.71E-08 |
| DNA duplex unwinding (GO:0032508)                            | 92   | 31  | 5.99   | + | 5.18 | 7.72E-08 |
| regulation of DNA-templated DNA replication (GO:0090329)     | 57   | 25  | 3.71   | + | 6.74 | 8.66E-08 |
| heterocycle biosynthetic process (GO:0018130)                | 1079 | 135 | 70.22  | + | 1.92 | 9.48E-08 |
| organonitrogen compound biosynthetic process (GO:1901566)    | 1333 | 157 | 86.76  | + | 1.81 | 1.04E-07 |
| system process (GO:0003008)                                  | 2079 | 65  | 135.31 | - | .48  | 1.09E-07 |
| negative regulation of cell cycle (GO:0045786)               | 359  | 64  | 23.36  | + | 2.74 | 1.71E-07 |
| RNA localization (GO:0006403)                                | 190  | 44  | 12.37  | + | 3.56 | 1.92E-07 |
| regulation of macromolecule metabolic process (GO:0060255)   | 6214 | 523 | 404.43 | + | 1.29 | 2.74E-07 |
| mitotic cell cycle checkpoint signaling (GO:0007093)         | 127  | 35  | 8.27   | + | 4.23 | 4.02E-07 |
| detection stimulus invol in sensory perception (GO:0050906)  | 560  | 4   | 36.45  | - | .11  | 4.36E-07 |
| negative regulation of mitotic cell cycle (GO:0045930)       | 213  | 46  | 13.86  | + | 3.32 | 5.15E-07 |
| neg reg of mitotic cell cycle phase transition (GO:1901991)  | 166  | 40  | 10.80  | + | 3.70 | 5.63E-07 |
| positive regulation of cell cycle (GO:0045787)               | 353  | 62  | 22.97  | + | 2.70 | 5.73E-07 |
| sensory perception of chemical stimulus (GO:0007606)         | 551  | 4   | 35.86  | - | .11  | 6.07E-07 |
| cellular respiration (GO:0045333)                            | 190  | 43  | 12.37  | + | 3.48 | 6.10E-07 |
| nucleocytoplasmic transport (GO:0006913)                     | 248  | 50  | 16.14  | + | 3.10 | 6.36E-07 |
| nuclear transport (GO:0051169)                               | 248  | 50  | 16.14  | + | 3.10 | 6.36E-07 |
| sensory perception of smell (GO:0007608)                     | 470  | 2   | 30.59  | - | .07  | 7.49E-07 |
| nucleic acid phosphodiester bond hydrolysis (GO:0090305)     | 258  | 51  | 16.79  | + | 3.04 | 7.59E-07 |
| macromolecule modification (GO:0043412)                      | 2883 | 278 | 187.64 | + | 1.48 | 7.96E-07 |
| aromatic compound biosynthetic process (GO:0019438)          | 1089 | 132 | 70.88  | + | 1.86 | 9.55E-07 |

|                                                                 |      |     |        |   |       |          |
|-----------------------------------------------------------------|------|-----|--------|---|-------|----------|
| regulation of chromosome separation (GO:1905818)                | 111  | 32  | 7.22   | + | 4.43  | 1.04E-06 |
| sister chromatid segregation (GO:0000819)                       | 148  | 37  | 9.63   | + | 3.84  | 1.21E-06 |
| mitotic sister chromatid segregation (GO:0000070)               | 120  | 33  | 7.81   | + | 4.23  | 1.51E-06 |
| regulation of metabolic process (GO:0019222)                    | 6754 | 555 | 439.57 | + | 1.26  | 1.62E-06 |
| macromolecule biosynthetic process (GO:0009059)                 | 1487 | 165 | 96.78  | + | 1.70  | 1.97E-06 |
| positive regulation of DNA biosynthetic process (GO:2000573)    | 75   | 26  | 4.88   | + | 5.33  | 2.22E-06 |
| pos reg of response to DNA damage stimulus (GO:2001022)         | 168  | 39  | 10.93  | + | 3.57  | 2.48E-06 |
| detection of stimulus (GO:0051606)                              | 686  | 9   | 44.65  | - | .20   | 2.66E-06 |
| detection of chemical stimulus (GO:0009593)                     | 526  | 4   | 34.23  | - | .12   | 2.72E-06 |
| regulation of chromosome segregation (GO:0051983)               | 131  | 34  | 8.53   | + | 3.99  | 2.93E-06 |
| sensory perception (GO:0007600)                                 | 997  | 21  | 64.89  | - | .32   | 4.33E-06 |
| cellular amino acid metabolic process (GO:0006520)              | 283  | 52  | 18.42  | + | 2.82  | 4.85E-06 |
| nuclear DNA replication (GO:0033260)                            | 24   | 16  | 1.56   | + | 10.24 | 4.99E-06 |
| organic cyclic compound biosynthetic process (GO:1901362)       | 1216 | 140 | 79.14  | + | 1.77  | 5.48E-06 |
| nucleo containing compound biosynthetic process (GO:0034654)    | 1007 | 122 | 65.54  | + | 1.86  | 5.57E-06 |
| positive regulation of chromosome organization (GO:2001252)     | 106  | 30  | 6.90   | + | 4.35  | 5.71E-06 |
| aerobic respiration (GO:0009060)                                | 159  | 37  | 10.35  | + | 3.58  | 6.70E-06 |
| cell cycle DNA replication (GO:0044786)                         | 25   | 16  | 1.63   | + | 9.83  | 7.72E-06 |
| DNA-temp DNA replication maintenance of fidelity (GO:0045005)   | 56   | 22  | 3.64   | + | 6.04  | 8.03E-06 |
| protein metabolic process (GO:0019538)                          | 3920 | 350 | 255.13 | + | 1.37  | 9.43E-06 |
| establishment of RNA localization (GO:0051236)                  | 170  | 38  | 11.06  | + | 3.43  | 1.05E-05 |
| regulation of cellular metabolic process (GO:0031323)           | 5647 | 473 | 367.53 | + | 1.29  | 1.12E-05 |
| mitotic nuclear division (GO:0140014)                           | 173  | 38  | 11.26  | + | 3.37  | 1.60E-05 |
| cell cycle phase transition (GO:0044770)                        | 183  | 39  | 11.91  | + | 3.27  | 2.05E-05 |
| reg of mitotic metaphase/anaphase transition (GO:0030071)       | 92   | 27  | 5.99   | + | 4.51  | 2.11E-05 |
| RNA transport (GO:0050658)                                      | 168  | 37  | 10.93  | + | 3.38  | 2.45E-05 |
| nucleic acid transport (GO:0050657)                             | 168  | 37  | 10.93  | + | 3.38  | 2.45E-05 |
| regulation of organelle organization (GO:0033043)               | 1189 | 135 | 77.38  | + | 1.74  | 3.17E-05 |
| reg of metaphase/anaphase transition of cell cycle (GO:1902099) | 95   | 27  | 6.18   | + | 4.37  | 3.78E-05 |

|                                                                  |      |     |        |   |       |          |
|------------------------------------------------------------------|------|-----|--------|---|-------|----------|
| mitochondrial gene expression (GO:0140053)                       | 141  | 33  | 9.18   | + | 3.60  | 4.88E-05 |
| regulation of mitotic sister chromatid separation (GO:0010965)   | 98   | 27  | 6.38   | + | 4.23  | 6.60E-05 |
| regulation of sister chromatid segregation (GO:0033045)          | 107  | 28  | 6.96   | + | 4.02  | 9.06E-05 |
| regulation of DNA repair (GO:0006282)                            | 212  | 41  | 13.80  | + | 2.97  | 9.21E-05 |
| positive regulation of DNA repair (GO:0045739)                   | 130  | 31  | 8.46   | + | 3.66  | 9.70E-05 |
| chromatin remodeling (GO:0006338)                                | 323  | 53  | 21.02  | + | 2.52  | 1.15E-04 |
| cellular component assembly (GO:0022607)                         | 2394 | 229 | 155.81 | + | 1.47  | 1.32E-04 |
| protein-DNA complex subunit organization (GO:0071824)            | 233  | 43  | 15.16  | + | 2.84  | 1.35E-04 |
| mitotic cell cycle phase transition (GO:0044772)                 | 173  | 36  | 11.26  | + | 3.20  | 1.44E-04 |
| regulation of DNA biosynthetic process (GO:2000278)              | 125  | 30  | 8.14   | + | 3.69  | 1.47E-04 |
| telomere organization (GO:0032200)                               | 103  | 27  | 6.70   | + | 4.03  | 1.61E-04 |
| energy derivat by oxidation of organic compounds (GO:0015980)    | 261  | 46  | 16.99  | + | 2.71  | 1.79E-04 |
| response to ionizing radiation (GO:0010212)                      | 144  | 32  | 9.37   | + | 3.41  | 2.38E-04 |
| DNA integrity checkpoint signaling (GO:0031570)                  | 113  | 28  | 7.35   | + | 3.81  | 2.46E-04 |
| DNA strand elongation (GO:0022616)                               | 20   | 13  | 1.30   | + | 9.99  | 2.63E-04 |
| mRNA transport (GO:0051028)                                      | 138  | 31  | 8.98   | + | 3.45  | 3.17E-04 |
| replication fork processing (GO:0031297)                         | 47   | 18  | 3.06   | + | 5.88  | 3.72E-04 |
| generation of precursor metabolites and energy (GO:0006091)      | 406  | 60  | 26.42  | + | 2.27  | 3.98E-04 |
| meiotic cell cycle (GO:0051321)                                  | 251  | 44  | 16.34  | + | 2.69  | 4.14E-04 |
| nuclear export (GO:0051168)                                      | 133  | 30  | 8.66   | + | 3.47  | 4.86E-04 |
| response to stress (GO:0006950)                                  | 3466 | 306 | 225.58 | + | 1.36  | 5.19E-04 |
| negative regulation of chromosome organization (GO:2001251)      | 82   | 23  | 5.34   | + | 4.31  | 6.44E-04 |
| regulation of double-strand break repair (GO:2000779)            | 135  | 30  | 8.79   | + | 3.41  | 6.45E-04 |
| tRNA processing (GO:0008033)                                     | 135  | 30  | 8.79   | + | 3.41  | 6.45E-04 |
| signaling (GO:0023052)                                           | 5231 | 255 | 340.45 | - | .75   | 8.31E-04 |
| mitochondrion organization (GO:0007005)                          | 445  | 63  | 28.96  | + | 2.18  | 8.37E-04 |
| regulation of G2/M transition of mitotic cell cycle (GO:0010389) | 98   | 25  | 6.38   | + | 3.92  | 8.41E-04 |
| pos reg of nucle-contain cmpd metabolic process (GO:0045935)     | 2058 | 198 | 133.94 | + | 1.48  | 1.02E-03 |
| reg of establishment of protein localiz to telomere (GO:0070203) | 11   | 10  | .72    | + | 13.97 | 1.24E-03 |

|                                                                   |      |     |        |   |       |          |
|-------------------------------------------------------------------|------|-----|--------|---|-------|----------|
| pos regulation of protein localization to Cajal body (GO:1904871) | 11   | 10  | .72    | + | 13.97 | 1.24E-03 |
| regulation of protein localization to Cajal body (GO:1904869)     | 11   | 10  | .72    | + | 13.97 | 1.24E-03 |
| translation (GO:0006412)                                          | 379  | 56  | 24.67  | + | 2.27  | 1.27E-03 |
| regulation of cellular response to stress (GO:0080135)            | 709  | 87  | 46.14  | + | 1.89  | 1.33E-03 |
| nucleobase-containing compound transport (GO:0015931)             | 225  | 40  | 14.64  | + | 2.73  | 1.49E-03 |
| telomere maintenance (GO:0000723)                                 | 94   | 24  | 6.12   | + | 3.92  | 1.49E-03 |
| electron transport chain (GO:0022900)                             | 167  | 33  | 10.87  | + | 3.04  | 1.61E-03 |
| protein localization to organelle (GO:0033365)                    | 694  | 85  | 45.17  | + | 1.88  | 1.61E-03 |
| regulation of cell cycle G2/M phase transition (GO:1902749)       | 110  | 26  | 7.16   | + | 3.63  | 1.70E-03 |
| regulation of mRNA metabolic process (GO:1903311)                 | 301  | 48  | 19.59  | + | 2.45  | 1.72E-03 |
| oxidative phosphorylation (GO:0006119)                            | 119  | 27  | 7.74   | + | 3.49  | 2.01E-03 |
| reg of establishment of protein localize to chr (GO:0070202)      | 12   | 10  | .78    | + | 12.80 | 2.14E-03 |
| peptide biosynthetic process (GO:0043043)                         | 408  | 58  | 26.55  | + | 2.18  | 2.21E-03 |
| respiratory electron transport chain (GO:0022904)                 | 113  | 26  | 7.35   | + | 3.54  | 2.66E-03 |
| nucleus organization (GO:0006997)                                 | 146  | 30  | 9.50   | + | 3.16  | 2.81E-03 |
| dbl-strnd break repair nonhomologous end joining (GO:0006303)     | 43   | 16  | 2.80   | + | 5.72  | 2.88E-03 |
| amide biosynthetic process (GO:0043604)                           | 527  | 69  | 34.30  | + | 2.01  | 3.14E-03 |
| positive regulation of cell cycle phase transition (GO:1901989)   | 115  | 26  | 7.48   | + | 3.47  | 3.56E-03 |
| centromere complex assembly (GO:0034508)                          | 27   | 13  | 1.76   | + | 7.40  | 3.70E-03 |
| mitotic DNA integrity checkpoint signaling (GO:0044774)           | 85   | 22  | 5.53   | + | 3.98  | 3.98E-03 |
| regulation of telomere maintenance (GO:0032204)                   | 101  | 24  | 6.57   | + | 3.65  | 4.58E-03 |
| protein modification process (GO:0036211)                         | 2658 | 240 | 172.99 | + | 1.39  | 5.05E-03 |
| protein folding (GO:0006457)                                      | 221  | 38  | 14.38  | + | 2.64  | 5.10E-03 |
| pos reg of estab of protein localization to telomere (GO:1904851) | 10   | 9   | .65    | + | 13.83 | 5.67E-03 |
| cell communication (GO:0007154)                                   | 5342 | 267 | 347.67 | - | .77   | 5.79E-03 |
| positive regulation of telomere maintenance (GO:0032206)          | 66   | 19  | 4.30   | + | 4.42  | 6.26E-03 |
| carboxylic acid metabolic process (GO:0019752)                    | 822  | 94  | 53.50  | + | 1.76  | 6.29E-03 |
| RNA modification (GO:0009451)                                     | 179  | 33  | 11.65  | + | 2.83  | 6.39E-03 |
| post-transcriptional regulation of gene expression (GO:0010608)   | 498  | 65  | 32.41  | + | 2.01  | 6.66E-03 |

|                                                                 |      |     |        |   |       |          |
|-----------------------------------------------------------------|------|-----|--------|---|-------|----------|
| signal transduction (GO:0007165)                                | 4887 | 241 | 318.06 | - | .76   | 7.43E-03 |
| chromatin organization (GO:0006325)                             | 585  | 73  | 38.07  | + | 1.92  | 7.49E-03 |
| pos reg of nitrogen compound metabolic process (GO:0051173)     | 3174 | 277 | 206.57 | + | 1.34  | 7.69E-03 |
| positive regulation of double-strand break repair (GO:2000781)  | 89   | 22  | 5.79   | + | 3.80  | 7.72E-03 |
| meiotic cell cycle process (GO:1903046)                         | 190  | 34  | 12.37  | + | 2.75  | 7.92E-03 |
| negative regulation of mitotic nuclear division (GO:0045839)    | 41   | 15  | 2.67   | + | 5.62  | 8.01E-03 |
| positive regulation of mitotic cell cycle (GO:0045931)          | 121  | 26  | 7.88   | + | 3.30  | 8.21E-03 |
| secretion (GO:0046903)                                          | 527  | 9   | 34.30  | - | .26   | 8.53E-03 |
| oxoacid metabolic process (GO:0043436)                          | 848  | 96  | 55.19  | + | 1.74  | 8.75E-03 |
| DNA strand elongation involved in DNA replication (GO:0006271)  | 15   | 10  | .98    | + | 10.24 | 9.14E-03 |
| Pos reg of telomerase RNA local to Cajal body (GO:1904874)      | 15   | 10  | .98    | + | 10.24 | 9.14E-03 |
| reg of protein local to chr, telomeric region (GO:1904814)      | 15   | 10  | .98    | + | 10.24 | 9.14E-03 |
| phosphate-containing cmpd metabolic process (GO:0006796)        | 1855 | 177 | 120.73 | + | 1.47  | 9.83E-03 |
| maturation of 5.8S rRNA (GO:0000460)                            | 36   | 14  | 2.34   | + | 5.98  | 1.03E-02 |
| regulation of mRNA processing (GO:0050684)                      | 140  | 28  | 9.11   | + | 3.07  | 1.10E-02 |
| pos reg of mitotic cell cycle phase transition (GO:1901992)     | 92   | 22  | 5.99   | + | 3.67  | 1.24E-02 |
| ribonucleoprotein complex assembly (GO:0022618)                 | 201  | 35  | 13.08  | + | 2.68  | 1.25E-02 |
| regulation of mitotic sister chromatid segregation (GO:0033047) | 56   | 17  | 3.64   | + | 4.66  | 1.31E-02 |
| pos reg of telomere maint via telomere lengthen (GO:1904358)    | 37   | 14  | 2.41   | + | 5.81  | 1.34E-02 |
| organic acid metabolic process (GO:0006082)                     | 857  | 96  | 55.78  | + | 1.72  | 1.40E-02 |
| phosphorus metabolic process (GO:0006793)                       | 1881 | 178 | 122.42 | + | 1.45  | 1.46E-02 |
| macromolecule methylation (GO:0043414)                          | 280  | 43  | 18.22  | + | 2.36  | 1.48E-02 |
| RNA capping (GO:0036260)                                        | 21   | 11  | 1.37   | + | 8.05  | 1.55E-02 |
| chaperone-mediated protein folding (GO:0061077)                 | 71   | 19  | 4.62   | + | 4.11  | 1.58E-02 |
| mitotic DNA replication (GO:1902969)                            | 12   | 9   | .78    | + | 11.52 | 1.61E-02 |
| regulation of mRNA splicing, via spliceosome (GO:0048024)       | 110  | 24  | 7.16   | + | 3.35  | 1.70E-02 |
| methylation (GO:0032259)                                        | 329  | 48  | 21.41  | + | 2.24  | 1.76E-02 |
| RNA phosphodiester bond hydrolysis (GO:0090501)                 | 162  | 30  | 10.54  | + | 2.85  | 1.87E-02 |
| cell cycle G1/S phase transition (GO:0044843)                   | 87   | 21  | 5.66   | + | 3.71  | 1.89E-02 |



|                                                                  |      |     |        |   |       |          |
|------------------------------------------------------------------|------|-----|--------|---|-------|----------|
| regulation of macromolecule biosynthetic process (GO:0010556)    | 3938 | 329 | 256.30 | + | 1.28  | 1.96E-02 |
| alpha-amino acid metabolic process (GO:1901605)                  | 198  | 34  | 12.89  | + | 2.64  | 2.17E-02 |
| neg reg of mitotic metaphase/anaphase transition (GO:0045841)    | 33   | 13  | 2.15   | + | 6.05  | 2.22E-02 |
| reg of signal transduction by p53 class mediator (GO:1901796)    | 104  | 23  | 6.77   | + | 3.40  | 2.27E-02 |
| ribonucleoprotein complex subunit organization (GO:0071826)      | 209  | 35  | 13.60  | + | 2.57  | 2.27E-02 |
| meiotic nuclear division (GO:0140013)                            | 173  | 31  | 11.26  | + | 2.75  | 2.32E-02 |
| pos reg of protein local to chr, telomeric region (GO:1904816)   | 13   | 9   | .85    | + | 10.64 | 2.58E-02 |
| pos reg of DNA-directed DNA polymerase activity (GO:1900264)     | 13   | 9   | .85    | + | 10.64 | 2.58E-02 |
| reg of DNA-directed DNA polymerase activity (GO:1900262)         | 13   | 9   | .85    | + | 10.64 | 2.58E-02 |
| neg reg of macromolecule metabolic process (GO:0010605)          | 2764 | 243 | 179.89 | + | 1.35  | 2.63E-02 |
| pos reg of telomere maintenance via telomerase (GO:0032212)      | 34   | 13  | 2.21   | + | 5.87  | 2.89E-02 |
| reg of telomerase RNA localization to Cajal body (GO:1904872)    | 18   | 10  | 1.17   | + | 8.54  | 3.10E-02 |
| mitochondrial ATP syn coupled electron transport (GO:0042775)    | 91   | 21  | 5.92   | + | 3.55  | 3.47E-02 |
| ATP synthesis coupled electron transport (GO:0042773)            | 91   | 21  | 5.92   | + | 3.55  | 3.47E-02 |
| mitochondrial respiratory chain complex assembly (GO:0033108)    | 99   | 22  | 6.44   | + | 3.41  | 3.49E-02 |
| small molecule metabolic process (GO:0044281)                    | 1654 | 158 | 107.65 | + | 1.47  | 3.55E-02 |
| somatic immun recept germline recom single locus (GO:0002562)    | 41   | 14  | 2.67   | + | 5.25  | 3.59E-02 |
| interstrand cross-link repair (GO:0036297)                       | 41   | 14  | 2.67   | + | 5.25  | 3.59E-02 |
| somatic cell DNA recombination (GO:0016444)                      | 41   | 14  | 2.67   | + | 5.25  | 3.59E-02 |
| peptide metabolic process (GO:0006518)                           | 537  | 66  | 34.95  | + | 1.89  | 3.72E-02 |
| neg reg of metaphase/anaphase transition cell cycle (GO:1902100) | 35   | 13  | 2.28   | + | 5.71  | 3.75E-02 |
| regulation of DNA recombination (GO:0000018)                     | 133  | 26  | 8.66   | + | 3.00  | 3.76E-02 |
| nuclear pore organization (GO:0006999)                           | 14   | 9   | .91    | + | 9.88  | 4.02E-02 |
| RNA methylation (GO:0001510)                                     | 92   | 21  | 5.99   | + | 3.51  | 4.02E-02 |
| negative regulation of nuclear division (GO:0051784)             | 48   | 15  | 3.12   | + | 4.80  | 4.02E-02 |
| reg telomere maintenance via tel lengthening (GO:1904356)        | 62   | 17  | 4.04   | + | 4.21  | 4.17E-02 |
| nucleoside phosphate metabolic process (GO:0006753)              | 525  | 65  | 34.17  | + | 1.90  | 4.20E-02 |
| cell-cell signaling (GO:0007267)                                 | 1083 | 35  | 70.49  | - | .50   | 4.41E-02 |
| G1/S transition of mitotic cell cycle (GO:0000082)               | 85   | 20  | 5.53   | + | 3.62  | 4.57E-02 |

|                                                              |     |    |      |   |      |          |
|--------------------------------------------------------------|-----|----|------|---|------|----------|
| cellular response to leukemia inhibitory factor (GO:1990830) | 93  | 21 | 6.05 | + | 3.47 | 4.64E-02 |
| neg reg of mitotic sister chromatid separation (GO:2000816)  | 36  | 13 | 2.34 | + | 5.55 | 4.82E-02 |
| neg reg of mitotic sister chromatid segregation (GO:0033048) | 36  | 13 | 2.34 | + | 5.55 | 4.82E-02 |
| neg regulation of sister chromatid segregation (GO:0033046)  | 36  | 13 | 2.34 | + | 5.55 | 4.82E-02 |
| regulation of mitotic nuclear division (GO:0007088)          | 118 | 24 | 7.68 | + | 3.13 | 4.86E-02 |
