# Supplementary material for: RNA Sequencing in Hypoxia-Adapted T98G Glioblastoma Cells Provides Supportive Evidence for IRE1 as a Potential Therapeutic Target
Source: MDPI journal article supplement (doi:10.3390/genes14040841), 2023-03-31
Supplement: s1 [file s1]

Supplementary Table S3. All T98G GBM cell DEGs upregulated in hypoxia at p&lt;0.05

| GeneID   | baseMean | log2FoldCI | lfcSE    | stat     | p value  | q value  |
|----------|----------|------------|----------|----------|----------|----------|
| CA9      | 665.8842 | -4.11644   | 0.204531 | -20.1262 | 4.35E-90 | 6.71E-86 |
| ENO2     | 3284.891 | -2.09449   | 0.117369 | -17.8454 | 3.14E-71 | 2.42E-67 |
| NDRG1    | 35485.88 | -2.39942   | 0.152605 | -15.7231 | 1.05E-55 | 5.41E-52 |
| ppfia4   | 255.6877 | -2.59846   | 0.182142 | -14.2661 | 3.56E-46 | 1.37E-42 |
| TGFBI    | 85814.17 | -1.63369   | 0.114908 | -14.2174 | 7.14E-46 | 2.20E-42 |
| HILPDA   | 843.1286 | -1.77678   | 0.128509 | -13.8261 | 1.77E-43 | 4.56E-40 |
| FER1L4   | 2989.299 | -1.98718   | 0.146885 | -13.5288 | 1.06E-41 | 2.33E-38 |
| EGLN3    | 1170.532 | -1.78259   | 0.133873 | -13.3155 | 1.88E-40 | 3.63E-37 |
| PGK1     | 49351.24 | -1.37506   | 0.108421 | -12.6826 | 7.39E-37 | 1.14E-33 |
| PFKFB4   | 1070.35  | -2.31271   | 0.182807 | -12.6511 | 1.10E-36 | 1.55E-33 |
| SLC2A1   | 8291.498 | -1.76037   | 0.139863 | -12.5864 | 2.51E-36 | 3.23E-33 |
| FAM162A  | 1039.344 | -1.83736   | 0.1529   | -12.0167 | 2.90E-33 | 3.45E-30 |
| TCAF2    | 613.8003 | -2.05934   | 0.17164  | -11.998  | 3.64E-33 | 4.01E-30 |
| LOC15476 | 303.6035 | -2.12835   | 0.185299 | -11.4861 | 1.55E-30 | 1.60E-27 |
| CP       | 2728.579 | -1.69845   | 0.15156  | -11.2064 | 3.79E-29 | 3.55E-26 |
| FUT11    | 526.6089 | -1.53173   | 0.136717 | -11.2036 | 3.91E-29 | 3.55E-26 |
| LOXL2    | 12150.35 | -1.62642   | 0.14595  | -11.1437 | 7.69E-29 | 6.25E-26 |
| LOX      | 6225.593 | -1.82033   | 0.164795 | -11.046  | 2.29E-28 | 1.77E-25 |
| SPAG4    | 808.9875 | -1.99385   | 0.18125  | -11.0005 | 3.80E-28 | 2.79E-25 |
| COL1A2   | 49282.48 | -1.54984   | 0.143933 | -10.7678 | 4.89E-27 | 3.43E-24 |
| TMEM45A  | 610.9382 | -1.56936   | 0.145828 | -10.7617 | 5.22E-27 | 3.50E-24 |
| ZP1      | 94.46856 | -3.2455    | 0.304948 | -10.6428 | 1.88E-26 | 1.21E-23 |
| GPI      | 23822.39 | -1.54554   | 0.148437 | -10.4121 | 2.18E-25 | 1.35E-22 |
| PPP1R3C  | 287.535  | -1.85462   | 0.181286 | -10.2304 | 1.45E-24 | 8.61E-22 |
| SLITRK6  | 180.9013 | -2.2006    | 0.217348 | -10.1247 | 4.29E-24 | 2.28E-21 |
| SLC6A8   | 522.5746 | -1.71239   | 0.170208 | -10.0606 | 8.25E-24 | 4.24E-21 |
| C4orf3   | 2079.111 | -1.14344   | 0.114035 | -10.0271 | 1.16E-23 | 5.77E-21 |
| ANGPTL4  | 91.34349 | -3.04458   | 0.313346 | -9.71636 | 2.57E-22 | 1.24E-19 |
| GRIN2A   | 471.3608 | -1.46246   | 0.152099 | -9.61515 | 6.90E-22 | 3.23E-19 |
| HK2      | 5138.288 | -1.30157   | 0.135941 | -9.57457 | 1.02E-21 | 4.64E-19 |
| CLEC3B   | 59.10292 | -3.81532   | 0.40001  | -9.53807 | 1.46E-21 | 6.42E-19 |
| SH3D21   | 440.1832 | -1.43444   | 0.152093 | -9.43136 | 4.05E-21 | 1.74E-18 |
| RNASE4   | 118.8881 | -2.21288   | 0.235662 | -9.39006 | 6.00E-21 | 2.44E-18 |
| PLIN2    | 1931.412 | -1.12774   | 0.120227 | -9.38005 | 6.59E-21 | 2.61E-18 |
| MAP7D2   | 211.0734 | -2.75481   | 0.295073 | -9.33601 | 1.00E-20 | 3.86E-18 |
| PTPRF    | 5316.253 | -1.52317   | 0.16359  | -9.3109  | 1.27E-20 | 4.77E-18 |
| ARFGEF3  | 226.1747 | -1.95876   | 0.210854 | -9.28967 | 1.55E-20 | 5.69E-18 |
| RORA     | 143.552  | -2.15375   | 0.234109 | -9.19978 | 3.59E-20 | 1.29E-17 |
| BNIP3    | 6206.287 | -1.22365   | 0.133079 | -9.19494 | 3.75E-20 | 1.32E-17 |
| COL5A1   | 10315.52 | -1.42773   | 0.155459 | -9.18398 | 4.15E-20 | 1.43E-17 |
| P4HA2    | 5520.261 | -1.18323   | 0.129071 | -9.16729 | 4.85E-20 | 1.63E-17 |
| MXI1     | 1078.35  | -1.27286   | 0.141259 | -9.01082 | 2.05E-19 | 6.58E-17 |
| IRS2     | 994.4374 | -1.18254   | 0.134172 | -8.81359 | 1.21E-18 | 3.82E-16 |
| ADM      | 4056.903 | -1.13932   | 0.130104 | -8.75704 | 2.00E-18 | 6.19E-16 |
| P4HA1    | 7807.005 | -1.2489    | 0.144462 | -8.64514 | 5.37E-18 | 1.60E-15 |
| MT1X     | 996.9279 | -1.67277   | 0.193759 | -8.63324 | 5.96E-18 | 1.74E-15 |

|          |          |          |          |          |          |          |
|----------|----------|----------|----------|----------|----------|----------|
| ADSSL1   | 239.9459 | -1.69544 | 0.197701 | -8.57575 | 9.84E-18 | 2.81E-15 |
| MIR210HC | 650.4534 | -1.92404 | 0.226177 | -8.50681 | 1.79E-17 | 5.02E-15 |
| TGM2     | 280.4677 | -1.59079 | 0.18727  | -8.49463 | 1.99E-17 | 5.47E-15 |
| ZNF395   | 3944.913 | -1.13319 | 0.134585 | -8.41992 | 3.77E-17 | 1.02E-14 |
| PFKFB3   | 2380.493 | -1.00184 | 0.120336 | -8.3253  | 8.41E-17 | 2.24E-14 |
| STC1     | 4077.496 | -0.87326 | 0.106873 | -8.17103 | 3.06E-16 | 7.87E-14 |
| CALR     | 23524.14 | -0.85033 | 0.104055 | -8.1719  | 3.04E-16 | 7.87E-14 |
| AK4      | 1862.924 | -1.19529 | 0.149051 | -8.01934 | 1.06E-15 | 2.69E-13 |
| ERO1A    | 2775.035 | -1.17082 | 0.149403 | -7.83665 | 4.63E-15 | 1.13E-12 |
| IGFBP3   | 51153.04 | -1.4077  | 0.185495 | -7.58891 | 3.23E-14 | 7.32E-12 |
| INHBA    | 921.0562 | -1.75491 | 0.234393 | -7.48704 | 7.04E-14 | 1.58E-11 |
| c4orf47  | 33.11993 | -4.06378 | 0.544862 | -7.45836 | 8.76E-14 | 1.91E-11 |
| PLOD1    | 6188.207 | -1.41831 | 0.190386 | -7.44967 | 9.36E-14 | 2.01E-11 |
| BNIP3L   | 8069.484 | -0.86675 | 0.118362 | -7.32284 | 2.43E-13 | 5.13E-11 |
| GAPDH    | 110739.3 | -1.33984 | 0.184725 | -7.25317 | 4.07E-13 | 8.27E-11 |
| VEGFA    | 1585.789 | -1.0239  | 0.141393 | -7.2415  | 4.44E-13 | 8.90E-11 |
| PDGFB    | 69.83487 | -2.11138 | 0.293525 | -7.1932  | 6.33E-13 | 1.25E-10 |
| ACAP1    | 162.4227 | -1.94645 | 0.270734 | -7.18953 | 6.50E-13 | 1.27E-10 |
| AFDN     | 2213.592 | -0.84556 | 0.117844 | -7.17527 | 7.22E-13 | 1.39E-10 |
| FAM13A   | 1322.198 | -0.88974 | 0.124265 | -7.16004 | 8.07E-13 | 1.54E-10 |
| F3       | 1062.589 | -0.96678 | 0.136415 | -7.087   | 1.37E-12 | 2.58E-10 |
| LPCAT1   | 1391.533 | -0.96755 | 0.137339 | -7.04497 | 1.86E-12 | 3.45E-10 |
| VIM      | 42594.04 | -0.69942 | 0.099445 | -7.03324 | 2.02E-12 | 3.71E-10 |
| GJA1     | 1843.891 | -0.96358 | 0.137945 | -6.98524 | 2.84E-12 | 5.16E-10 |
| NMU      | 75.71724 | -1.9047  | 0.273122 | -6.97379 | 3.09E-12 | 5.54E-10 |
| CAMK2N1  | 1201.002 | -1.0129  | 0.145664 | -6.95369 | 3.56E-12 | 6.24E-10 |
| STC2     | 3565.387 | -0.82372 | 0.119097 | -6.91635 | 4.63E-12 | 7.96E-10 |
| NRN1     | 1075.423 | -0.95734 | 0.139041 | -6.88533 | 5.77E-12 | 9.67E-10 |
| FAM46A   | 2421.846 | -0.94212 | 0.136803 | -6.88671 | 5.71E-12 | 9.67E-10 |
| VLDLR    | 209.8958 | -1.34368 | 0.195288 | -6.88048 | 5.97E-12 | 9.80E-10 |
| GYS1     | 1379.218 | -1.16977 | 0.169991 | -6.88136 | 5.93E-12 | 9.80E-10 |
| PAM      | 9804.993 | -0.90985 | 0.132733 | -6.85474 | 7.14E-12 | 1.16E-09 |
| PTPRN    | 418.1848 | -1.45538 | 0.212928 | -6.83509 | 8.20E-12 | 1.32E-09 |
| WISP1    | 912.8539 | -1.03124 | 0.151533 | -6.80538 | 1.01E-11 | 1.60E-09 |
| SMIM3    | 1237.176 | -0.97128 | 0.143491 | -6.76891 | 1.30E-11 | 2.04E-09 |
| LRP1     | 4083.528 | -1.38651 | 0.204899 | -6.76678 | 1.32E-11 | 2.05E-09 |
| ENO1     | 58843.73 | -0.89106 | 0.131883 | -6.75646 | 1.41E-11 | 2.18E-09 |
| MCF2L    | 648.2869 | -0.99186 | 0.147427 | -6.72782 | 1.72E-11 | 2.63E-09 |
| PLOD2    | 16997.72 | -0.91751 | 0.138106 | -6.64353 | 3.06E-11 | 4.59E-09 |
| P4HB     | 10391.73 | -0.9751  | 0.146883 | -6.63861 | 3.17E-11 | 4.70E-09 |
| INSIG2   | 595.0636 | -1.18068 | 0.178919 | -6.59894 | 4.14E-11 | 6.03E-09 |
| NOL3     | 645.7815 | -1.2332  | 0.186966 | -6.59587 | 4.23E-11 | 6.10E-09 |
| TAF9B    | 2200.479 | -1.09181 | 0.165796 | -6.58523 | 4.54E-11 | 6.49E-09 |
| MAGED4B  | 506.1022 | -1.22598 | 0.187597 | -6.53515 | 6.35E-11 | 9.00E-09 |
| snx33    | 809.2986 | -1.07712 | 0.164884 | -6.53261 | 6.46E-11 | 9.07E-09 |
| CEP250   | 3656.618 | -0.81954 | 0.125981 | -6.50524 | 7.76E-11 | 1.08E-08 |
| ANKZF1   | 1464.704 | -0.92935 | 0.143011 | -6.49845 | 8.12E-11 | 1.12E-08 |

|          |          |          |          |          |          |          |
|----------|----------|----------|----------|----------|----------|----------|
| SDK1     | 960.6936 | -0.82462 | 0.126998 | -6.4932  | 8.40E-11 | 1.15E-08 |
| PDK1     | 4409.011 | -0.96217 | 0.148237 | -6.49079 | 8.54E-11 | 1.16E-08 |
| WDR54    | 700.802  | -1.12005 | 0.173103 | -6.47046 | 9.77E-11 | 1.31E-08 |
| MYLK     | 16176.42 | -0.62918 | 0.097982 | -6.42136 | 1.35E-10 | 1.77E-08 |
| APCDD1L  | 587.0755 | -0.86021 | 0.134124 | -6.41354 | 1.42E-10 | 1.84E-08 |
| apcdd1l  | 190.8491 | -1.22179 | 0.190837 | -6.40224 | 1.53E-10 | 1.95E-08 |
| TMEM158  | 562.7468 | -1.03974 | 0.162667 | -6.39184 | 1.64E-10 | 2.07E-08 |
| H1FO     | 704.2118 | -0.82037 | 0.128454 | -6.38648 | 1.70E-10 | 2.13E-08 |
| TPI1     | 22070.83 | -0.96427 | 0.151604 | -6.36045 | 2.01E-10 | 2.50E-08 |
| MT2A     | 1899.648 | -1.26748 | 0.200381 | -6.32538 | 2.53E-10 | 3.12E-08 |
| Maged4   | 501.3265 | -1.20629 | 0.191269 | -6.30679 | 2.85E-10 | 3.44E-08 |
| COL6A3   | 270324   | -0.73711 | 0.116855 | -6.30788 | 2.83E-10 | 3.44E-08 |
| NPTX1    | 2471.145 | -0.74044 | 0.117638 | -6.29421 | 3.09E-10 | 3.67E-08 |
| NEDD9    | 372.259  | -1.04919 | 0.167339 | -6.26985 | 3.61E-10 | 4.26E-08 |
| PFKP     | 5698.102 | -0.9153  | 0.146647 | -6.24153 | 4.33E-10 | 5.07E-08 |
| MYO1E    | 1778.658 | -0.7211  | 0.115599 | -6.23791 | 4.43E-10 | 5.15E-08 |
| ADAM12   | 1099.699 | -1.015   | 0.163016 | -6.2264  | 4.77E-10 | 5.50E-08 |
| DLGAP4   | 592.848  | -0.86686 | 0.139537 | -6.21241 | 5.22E-10 | 5.93E-08 |
| FLNB     | 16400.82 | -0.83937 | 0.135117 | -6.2122  | 5.22E-10 | 5.93E-08 |
| HSF4     | 330.1782 | -1.43466 | 0.231829 | -6.18843 | 6.08E-10 | 6.75E-08 |
| MPI      | 1234.908 | -1.02375 | 0.165595 | -6.18223 | 6.32E-10 | 6.92E-08 |
| PPP1R3B  | 773.6174 | -0.95362 | 0.154705 | -6.16408 | 7.09E-10 | 7.65E-08 |
| TPP1     | 1143.063 | -0.74466 | 0.121619 | -6.1229  | 9.19E-10 | 9.78E-08 |
| IGFBP6   | 867.1748 | -1.26678 | 0.207195 | -6.11395 | 9.72E-10 | 1.03E-07 |
| SPARC    | 24158.33 | -0.82612 | 0.13518  | -6.11125 | 9.89E-10 | 1.04E-07 |
| SCARB1   | 953.2647 | -1.13328 | 0.185713 | -6.10229 | 1.05E-09 | 1.09E-07 |
| COL7A1   | 4191.673 | -1.35372 | 0.222142 | -6.09393 | 1.10E-09 | 1.13E-07 |
| PAG1     | 1063.969 | -0.83583 | 0.137279 | -6.08857 | 1.14E-09 | 1.16E-07 |
| PLAUR    | 455.9481 | -1.09597 | 0.181709 | -6.03146 | 1.62E-09 | 1.61E-07 |
| SLPI     | 382.5299 | -1.20025 | 0.199787 | -6.00762 | 1.88E-09 | 1.85E-07 |
| AXL      | 8835.102 | -0.71528 | 0.119165 | -6.00245 | 1.94E-09 | 1.90E-07 |
| PRSS53   | 135.2772 | -1.65936 | 0.278294 | -5.96262 | 2.48E-09 | 2.39E-07 |
| PLBD2    | 359.7707 | -1.13019 | 0.189728 | -5.95692 | 2.57E-09 | 2.45E-07 |
| PGM1     | 4993.07  | -0.74547 | 0.125133 | -5.95744 | 2.56E-09 | 2.45E-07 |
| COL5A2   | 9110.532 | -0.62783 | 0.105684 | -5.94065 | 2.84E-09 | 2.69E-07 |
| JPH2     | 271.5398 | -1.15527 | 0.195192 | -5.91864 | 3.25E-09 | 3.06E-07 |
| vkorc1   | 1572.493 | -1.01725 | 0.17231  | -5.90362 | 3.56E-09 | 3.33E-07 |
| SLC6A6   | 15329.28 | -0.68541 | 0.116455 | -5.88562 | 3.97E-09 | 3.69E-07 |
| CD68     | 1659.363 | -1.05216 | 0.179196 | -5.87153 | 4.32E-09 | 3.97E-07 |
| KLF7     | 359.6017 | -0.92138 | 0.157434 | -5.85247 | 4.84E-09 | 4.37E-07 |
| IGFBP5   | 206249.3 | -0.9516  | 0.163001 | -5.83802 | 5.28E-09 | 4.69E-07 |
| ITPR1    | 1239.26  | -0.80553 | 0.137959 | -5.83895 | 5.25E-09 | 4.69E-07 |
| ARMCX2   | 250.5341 | -1.13433 | 0.195568 | -5.8002  | 6.62E-09 | 5.71E-07 |
| TBC1D8B  | 755.2171 | -1.0207  | 0.176417 | -5.78572 | 7.22E-09 | 6.16E-07 |
| ITGB4    | 105.6538 | -1.35817 | 0.235211 | -5.77425 | 7.73E-09 | 6.56E-07 |
| BHLHE40  | 3369.639 | -0.90519 | 0.157007 | -5.76531 | 8.15E-09 | 6.84E-07 |
| LOC72991 | 239.1374 | -0.96614 | 0.167738 | -5.75983 | 8.42E-09 | 6.99E-07 |

|           |          |          |          |          |          |          |
|-----------|----------|----------|----------|----------|----------|----------|
| Mt1f      | 110.0354 | -1.26871 | 0.221152 | -5.73682 | 9.65E-09 | 7.92E-07 |
| ITGBL1    | 1657.301 | -0.86956 | 0.151786 | -5.72887 | 1.01E-08 | 8.26E-07 |
| PLXNA3    | 595.3862 | -1.33782 | 0.233969 | -5.71796 | 1.08E-08 | 8.76E-07 |
| SDC4      | 1485.698 | -0.73442 | 0.128678 | -5.70747 | 1.15E-08 | 9.22E-07 |
| ANXA8     | 273.1701 | -0.92062 | 0.162729 | -5.65735 | 1.54E-08 | 1.21E-06 |
| MYDGF     | 1767.192 | -0.89364 | 0.15856  | -5.63597 | 1.74E-08 | 1.36E-06 |
| slc12a8   | 3866.045 | -0.67335 | 0.119947 | -5.61376 | 1.98E-08 | 1.54E-06 |
| LINC00887 | 24.60958 | -3.11793 | 0.556131 | -5.60647 | 2.06E-08 | 1.58E-06 |
| SPANXA2   | 412.8051 | -1.03079 | 0.184665 | -5.58194 | 2.38E-08 | 1.80E-06 |
| TMSB10    | 25668    | -0.73119 | 0.131202 | -5.57299 | 2.50E-08 | 1.89E-06 |
| EHD2      | 1120.327 | -1.09208 | 0.19636  | -5.56162 | 2.67E-08 | 2.00E-06 |
| AHNAK2    | 489.3014 | -0.88358 | 0.158938 | -5.55926 | 2.71E-08 | 2.02E-06 |
| GPRC5B    | 477.4904 | -0.81443 | 0.146742 | -5.55013 | 2.85E-08 | 2.12E-06 |
| THEMIS2   | 165.3938 | -1.10258 | 0.198764 | -5.54717 | 2.90E-08 | 2.14E-06 |
| TFPI2     | 356.785  | -1.27751 | 0.230573 | -5.5406  | 3.01E-08 | 2.21E-06 |
| FSCN1     | 508.6272 | -1.35635 | 0.245101 | -5.53386 | 3.13E-08 | 2.27E-06 |
| PDIA4     | 9415.702 | -0.67156 | 0.121787 | -5.51421 | 3.50E-08 | 2.50E-06 |
| CADM1     | 12491.34 | -0.72657 | 0.132028 | -5.50316 | 3.73E-08 | 2.64E-06 |
| LOC100501 | 1966.524 | -0.62774 | 0.114236 | -5.49508 | 3.91E-08 | 2.73E-06 |
| KCTD11    | 399.2022 | -0.98291 | 0.17938  | -5.47952 | 4.26E-08 | 2.94E-06 |
| MT1E      | 395.6526 | -0.82867 | 0.151763 | -5.46031 | 4.75E-08 | 3.25E-06 |
| FAM219A   | 736.5745 | -0.73148 | 0.13399  | -5.45925 | 4.78E-08 | 3.25E-06 |
| ARTN      | 37.19101 | -2.07432 | 0.380048 | -5.45804 | 4.81E-08 | 3.26E-06 |
| EFNA3     | 78.53282 | -1.53772 | 0.281831 | -5.45617 | 4.87E-08 | 3.28E-06 |
| CA12      | 2665.836 | -0.70909 | 0.130024 | -5.45354 | 4.94E-08 | 3.31E-06 |
| ALDOA     | 31747.94 | -1.28135 | 0.235294 | -5.44573 | 5.16E-08 | 3.45E-06 |
| MAF       | 582.8859 | -0.94544 | 0.173678 | -5.44363 | 5.22E-08 | 3.46E-06 |
| EGFR      | 4765.049 | -0.69742 | 0.128105 | -5.4441  | 5.21E-08 | 3.46E-06 |
| SEMA4B    | 567.1381 | -1.19957 | 0.220512 | -5.43992 | 5.33E-08 | 3.52E-06 |
| EGLN1     | 2267.904 | -0.69827 | 0.128518 | -5.43324 | 5.53E-08 | 3.64E-06 |
| PXDN      | 3942.433 | -0.73189 | 0.134775 | -5.43045 | 5.62E-08 | 3.65E-06 |
| C1QTNF1   | 90.43299 | -1.49201 | 0.275701 | -5.41169 | 6.24E-08 | 4.02E-06 |
| TRPM2     | 66.59512 | -1.65652 | 0.306763 | -5.4     | 6.66E-08 | 4.27E-06 |
| CERCAM    | 976.6064 | -1.36096 | 0.25386  | -5.36105 | 8.27E-08 | 5.26E-06 |
| SLC15A4   | 1045.794 | -0.66869 | 0.124834 | -5.35664 | 8.48E-08 | 5.36E-06 |
| CTSB      | 10801.34 | -0.72643 | 0.136086 | -5.33805 | 9.40E-08 | 5.88E-06 |
| SPANXA1   | 420.6603 | -1.01819 | 0.19078  | -5.33697 | 9.45E-08 | 5.88E-06 |
| LAMA4     | 5125.656 | -0.64682 | 0.121418 | -5.32722 | 9.97E-08 | 6.16E-06 |
| PLXNB3    | 235.066  | -1.15876 | 0.217743 | -5.32168 | 1.03E-07 | 6.32E-06 |
| PTPRH     | 199.5005 | -1.06388 | 0.200007 | -5.3192  | 1.04E-07 | 6.38E-06 |
| PLA2G16   | 266.9435 | -0.98373 | 0.185124 | -5.31392 | 1.07E-07 | 6.55E-06 |
| PRSS23    | 19127.65 | -0.56868 | 0.107324 | -5.29876 | 1.17E-07 | 7.09E-06 |
| PKD1L2    | 89.93907 | -1.25525 | 0.237154 | -5.29296 | 1.20E-07 | 7.29E-06 |
| ANG       | 41.32263 | -2.01713 | 0.381302 | -5.29012 | 1.22E-07 | 7.37E-06 |
| L1CAM     | 1814.153 | -0.96144 | 0.181764 | -5.28952 | 1.23E-07 | 7.37E-06 |
| ARL10     | 61.98383 | -1.73199 | 0.327986 | -5.28069 | 1.29E-07 | 7.67E-06 |
| olfml2a   | 505.9162 | -0.79517 | 0.150991 | -5.26637 | 1.39E-07 | 8.20E-06 |

|          |          |          |          |          |          |          |
|----------|----------|----------|----------|----------|----------|----------|
| AFDN-AS1 | 24.41915 | -2.71314 | 0.515609 | -5.26201 | 1.42E-07 | 8.36E-06 |
| PPP2R5B  | 438.3472 | -0.90642 | 0.172506 | -5.2544  | 1.49E-07 | 8.65E-06 |
| CITED2   | 1517.536 | -0.67168 | 0.128288 | -5.23574 | 1.64E-07 | 9.50E-06 |
| CREB3L1  | 239.7482 | -1.05445 | 0.202612 | -5.20426 | 1.95E-07 | 1.12E-05 |
| SH3PXD2A | 760.3418 | -0.76389 | 0.146839 | -5.20223 | 1.97E-07 | 1.13E-05 |
| HEMK1    | 823.2291 | -0.80201 | 0.154201 | -5.20107 | 1.98E-07 | 1.13E-05 |
| SLC16A3  | 2139.339 | -1.28998 | 0.249133 | -5.17789 | 2.24E-07 | 1.27E-05 |
| MXRA7    | 3661.613 | -0.59838 | 0.115579 | -5.17727 | 2.25E-07 | 1.27E-05 |
| PTPRB    | 165.3668 | -1.12554 | 0.217645 | -5.17147 | 2.32E-07 | 1.29E-05 |
| TBC1D2   | 918.3916 | -0.87227 | 0.168668 | -5.17149 | 2.32E-07 | 1.29E-05 |
| SYTL5    | 96.22673 | -1.52911 | 0.29606  | -5.16486 | 2.41E-07 | 1.34E-05 |
| ANXA8L1  | 202.0421 | -0.92838 | 0.180198 | -5.15197 | 2.58E-07 | 1.43E-05 |
| BAMBI    | 3218.391 | -0.69158 | 0.134253 | -5.15132 | 2.59E-07 | 1.43E-05 |
| IL32     | 112.7533 | -1.18648 | 0.231468 | -5.12589 | 2.96E-07 | 1.61E-05 |
| ITGA3    | 4342.717 | -0.83215 | 0.162355 | -5.12548 | 2.97E-07 | 1.61E-05 |
| TTYH3    | 1169.134 | -0.9836  | 0.192324 | -5.11428 | 3.15E-07 | 1.71E-05 |
| LOC69224 | 91.84083 | -1.45399 | 0.284961 | -5.1024  | 3.35E-07 | 1.80E-05 |
| ALKBH5   | 3478.007 | -0.76017 | 0.149161 | -5.09631 | 3.46E-07 | 1.86E-05 |
| CSPG4    | 78.89124 | -1.32863 | 0.260792 | -5.0946  | 3.49E-07 | 1.87E-05 |
| HCFC1R1  | 816.1019 | -1.09424 | 0.214903 | -5.0918  | 3.55E-07 | 1.89E-05 |
| BLCAP    | 1565.664 | -0.6145  | 0.121178 | -5.07104 | 3.96E-07 | 2.08E-05 |
| BET1L    | 1415.523 | -0.95275 | 0.188253 | -5.061   | 4.17E-07 | 2.18E-05 |
| DNAH5    | 1538.907 | -0.66319 | 0.131351 | -5.049   | 4.44E-07 | 2.31E-05 |
| TPBG     | 557.7029 | -0.87519 | 0.173421 | -5.04662 | 4.50E-07 | 2.33E-05 |
| COL13A1  | 116.6112 | -1.07951 | 0.21428  | -5.03784 | 4.71E-07 | 2.41E-05 |
| MICAL2   | 1381.016 | -0.57178 | 0.113652 | -5.03096 | 4.88E-07 | 2.49E-05 |
| nckipsd  | 456.2433 | -1.02836 | 0.206162 | -4.98812 | 6.10E-07 | 3.10E-05 |
| RNF165   | 236.6836 | -0.80408 | 0.161387 | -4.98234 | 6.28E-07 | 3.18E-05 |
| ADARB1   | 920.5156 | -0.89351 | 0.179408 | -4.98034 | 6.35E-07 | 3.20E-05 |
| PDIA6    | 6477.248 | -0.53457 | 0.107381 | -4.97829 | 6.41E-07 | 3.22E-05 |
| KDM6B    | 216.2727 | -0.87517 | 0.176109 | -4.96947 | 6.71E-07 | 3.34E-05 |
| NR1D1    | 247.141  | -0.93183 | 0.187782 | -4.96228 | 6.97E-07 | 3.46E-05 |
| TIMP3    | 18197.28 | -0.5876  | 0.118529 | -4.9574  | 7.14E-07 | 3.53E-05 |
| SEC14L2  | 1041.12  | -0.68829 | 0.139009 | -4.9514  | 7.37E-07 | 3.62E-05 |
| FAM160A1 | 354.5744 | -0.77594 | 0.156919 | -4.94486 | 7.62E-07 | 3.73E-05 |
| AMPD3    | 407.7048 | -0.68313 | 0.13859  | -4.92918 | 8.26E-07 | 4.00E-05 |
| SUSD2    | 844.6036 | -1.19063 | 0.241628 | -4.92754 | 8.33E-07 | 4.02E-05 |
| ACE      | 119.3186 | -1.2275  | 0.249337 | -4.92307 | 8.52E-07 | 4.10E-05 |
| TRIO     | 9611.416 | -0.49193 | 0.100095 | -4.91461 | 8.90E-07 | 4.26E-05 |
| F11R     | 231.1319 | -0.85183 | 0.173608 | -4.90662 | 9.27E-07 | 4.40E-05 |
| RAC2     | 587.4665 | -0.71113 | 0.145131 | -4.89988 | 9.59E-07 | 4.53E-05 |
| LGALS1   | 9033.484 | -0.97838 | 0.199824 | -4.8962  | 9.77E-07 | 4.60E-05 |
| CTAGE6   | 38.1471  | -1.9259  | 0.395684 | -4.86728 | 1.13E-06 | 5.28E-05 |
| DARS     | 3575.344 | -0.5726  | 0.117864 | -4.85817 | 1.18E-06 | 5.51E-05 |
| PTRF     | 6079.863 | -0.7253  | 0.149404 | -4.85463 | 1.21E-06 | 5.59E-05 |
| FARP1    | 2520.175 | -0.51027 | 0.105189 | -4.85103 | 1.23E-06 | 5.68E-05 |
| PDGFRL   | 58.2079  | -1.43916 | 0.296743 | -4.84985 | 1.24E-06 | 5.69E-05 |

|           |          |          |          |          |          |          |
|-----------|----------|----------|----------|----------|----------|----------|
| SERPINE1  | 252.5252 | -0.86486 | 0.17837  | -4.84866 | 1.24E-06 | 5.70E-05 |
| HRH1      | 655.2746 | -0.60863 | 0.125528 | -4.84854 | 1.24E-06 | 5.70E-05 |
| NEK6      | 2522.85  | -0.5925  | 0.12234  | -4.84304 | 1.28E-06 | 5.84E-05 |
| IFITM10   | 842.4471 | -1.09708 | 0.226657 | -4.84027 | 1.30E-06 | 5.90E-05 |
| ESYT2     | 7538.637 | -0.50941 | 0.105412 | -4.83256 | 1.35E-06 | 6.08E-05 |
| PLEKHA6   | 1386.412 | -0.93816 | 0.194202 | -4.83082 | 1.36E-06 | 6.12E-05 |
| PDK3      | 3398.95  | -0.5582  | 0.116438 | -4.79397 | 1.64E-06 | 7.30E-05 |
| IDS       | 2820.023 | -0.5322  | 0.111056 | -4.7922  | 1.65E-06 | 7.34E-05 |
| Tmem91    | 94.03109 | -1.2212  | 0.255439 | -4.7808  | 1.75E-06 | 7.67E-05 |
| SLC9A7    | 410.6554 | -0.79722 | 0.166767 | -4.7804  | 1.75E-06 | 7.67E-05 |
| TMED9     | 3121.873 | -0.79865 | 0.167143 | -4.77825 | 1.77E-06 | 7.71E-05 |
| S100A16   | 856.6981 | -0.73852 | 0.1546   | -4.77698 | 1.78E-06 | 7.74E-05 |
| TANC2     | 2821.111 | -0.71315 | 0.149441 | -4.77209 | 1.82E-06 | 7.88E-05 |
| SLA       | 40.24639 | -1.72478 | 0.36168  | -4.76881 | 1.85E-06 | 7.95E-05 |
| ucn2      | 90.14415 | -1.1799  | 0.247408 | -4.76905 | 1.85E-06 | 7.95E-05 |
| ELFN2     | 358.6599 | -0.74254 | 0.155706 | -4.76887 | 1.85E-06 | 7.95E-05 |
| SFXN3     | 992.8234 | -0.66073 | 0.138656 | -4.76522 | 1.89E-06 | 8.07E-05 |
| PMP22     | 1330.09  | -0.55857 | 0.117248 | -4.76399 | 1.90E-06 | 8.07E-05 |
| GXYLT2    | 882.7742 | -0.61012 | 0.128562 | -4.74574 | 2.08E-06 | 8.69E-05 |
| SLC2A1-AS | 245.4701 | -0.90761 | 0.191375 | -4.74256 | 2.11E-06 | 8.78E-05 |
| creld1    | 543.7794 | -1.05209 | 0.22197  | -4.73979 | 2.14E-06 | 8.88E-05 |
| DPCD      | 374.2056 | -0.72067 | 0.152127 | -4.73728 | 2.17E-06 | 8.96E-05 |
| KDM4C     | 894.216  | -0.62371 | 0.131694 | -4.73607 | 2.18E-06 | 8.99E-05 |
| ALS2CL    | 129.725  | -1.26343 | 0.26745  | -4.72398 | 2.31E-06 | 9.47E-05 |
| HSD3BP4   | 65.10252 | -1.34864 | 0.285749 | -4.71967 | 2.36E-06 | 9.60E-05 |
| TBC1D3F   | 487.389  | -0.70175 | 0.150005 | -4.67815 | 2.89E-06 | 0.000115 |
| PPP1R13L  | 107.5992 | -1.16429 | 0.249052 | -4.67488 | 2.94E-06 | 0.000117 |
| NR2F2-AS1 | 60.13217 | -1.49481 | 0.320022 | -4.67095 | 3.00E-06 | 0.000119 |
| CCNG2     | 1083.716 | -0.63904 | 0.136868 | -4.66904 | 3.03E-06 | 0.00012  |
| KDM4B     | 528.0838 | -1.03691 | 0.222676 | -4.65659 | 3.21E-06 | 0.000126 |
| WDR27     | 601.0413 | -0.67258 | 0.14467  | -4.64908 | 3.33E-06 | 0.00013  |
| ADAMTS9   | 40.92121 | -1.79093 | 0.386083 | -4.63873 | 3.51E-06 | 0.000135 |
| PTN       | 770.4855 | -0.73104 | 0.157962 | -4.62792 | 3.69E-06 | 0.000141 |
| SLC35E1   | 1588.492 | -0.59744 | 0.129738 | -4.60497 | 4.13E-06 | 0.000157 |
| TNXB      | 116.4953 | -1.32445 | 0.288315 | -4.59378 | 4.35E-06 | 0.000164 |
| HSPA5     | 8616.822 | -0.71809 | 0.157039 | -4.57267 | 4.82E-06 | 0.000179 |
| LIF       | 807.6169 | -0.72143 | 0.158285 | -4.55783 | 5.17E-06 | 0.00019  |
| PGAM1     | 9257.418 | -0.54068 | 0.118707 | -4.55474 | 5.25E-06 | 0.000192 |
| ZNF70     | 463.4499 | -0.62804 | 0.13812  | -4.54708 | 5.44E-06 | 0.000198 |
| TNIP1     | 2267.788 | -0.8013  | 0.176288 | -4.5454  | 5.48E-06 | 0.000199 |
| PER1      | 310.9666 | -0.94201 | 0.207399 | -4.54202 | 5.57E-06 | 0.000201 |
| CLEC2B    | 1098.759 | -0.6582  | 0.145142 | -4.53486 | 5.76E-06 | 0.000206 |
| BSG       | 3518.297 | -1.13803 | 0.251066 | -4.53282 | 5.82E-06 | 0.000207 |
| HSPG2     | 2196.217 | -1.10919 | 0.245077 | -4.52587 | 6.01E-06 | 0.000212 |
| PHF21A    | 738.8578 | -0.55026 | 0.121577 | -4.526   | 6.01E-06 | 0.000212 |
| POLR3D    | 916.2608 | -0.67816 | 0.149862 | -4.52524 | 6.03E-06 | 0.000212 |
| FOSL2     | 2228.563 | -0.7026  | 0.155469 | -4.51923 | 6.21E-06 | 0.000218 |

|           |          |          |          |          |          |          |
|-----------|----------|----------|----------|----------|----------|----------|
| DNHD1     | 1122.262 | -0.54919 | 0.121555 | -4.51807 | 6.24E-06 | 0.000218 |
| ARFGAP1   | 1582.58  | -0.99967 | 0.221341 | -4.51643 | 6.29E-06 | 0.000219 |
| CRELD2    | 716.3296 | -0.82975 | 0.184274 | -4.50282 | 6.71E-06 | 0.000232 |
| CDH6      | 7739.687 | -0.64469 | 0.143283 | -4.49942 | 6.81E-06 | 0.000235 |
| COL1A1    | 33.23584 | -1.82558 | 0.405845 | -4.49822 | 6.85E-06 | 0.000235 |
| AKAP12    | 187.5437 | -0.93237 | 0.207925 | -4.48417 | 7.32E-06 | 0.000249 |
| PPIB      | 3102.203 | -0.54821 | 0.122395 | -4.47906 | 7.50E-06 | 0.000253 |
| FAM20C    | 5014.54  | -0.80409 | 0.179701 | -4.47458 | 7.66E-06 | 0.000257 |
| FLNC      | 1365.111 | -1.04591 | 0.233772 | -4.47407 | 7.67E-06 | 0.000258 |
| TBC1D3    | 566.156  | -0.67723 | 0.151385 | -4.47355 | 7.69E-06 | 0.000258 |
| GANAB     | 17117.26 | -0.53782 | 0.120401 | -4.46689 | 7.94E-06 | 0.000265 |
| HSP90B1   | 32172.92 | -0.61346 | 0.137465 | -4.46267 | 8.09E-06 | 0.000269 |
| EDARADD   | 1374.788 | -0.55649 | 0.125172 | -4.44577 | 8.76E-06 | 0.000289 |
| RPTOR     | 1266.409 | -0.82258 | 0.185334 | -4.4384  | 9.06E-06 | 0.000298 |
| CSMD2     | 61.59824 | -1.33672 | 0.302246 | -4.42261 | 9.75E-06 | 0.000314 |
| DKK3      | 5259.255 | -0.45346 | 0.102573 | -4.42086 | 9.83E-06 | 0.000316 |
| SCN3A     | 408.4202 | -0.76428 | 0.173112 | -4.41497 | 1.01E-05 | 0.000323 |
| CDH15     | 53.85596 | -1.30594 | 0.295903 | -4.41339 | 1.02E-05 | 0.000325 |
| ADAM8     | 39.98605 | -1.70457 | 0.387823 | -4.39522 | 1.11E-05 | 0.000349 |
| BCKDK     | 699.6941 | -0.9022  | 0.205258 | -4.39544 | 1.11E-05 | 0.000349 |
| PDLIM2    | 280.6158 | -1.16687 | 0.265634 | -4.39278 | 1.12E-05 | 0.000351 |
| WSB1      | 5146.706 | -0.64977 | 0.147926 | -4.39257 | 1.12E-05 | 0.000351 |
| cyb5r3    | 1618.707 | -0.80865 | 0.184123 | -4.39187 | 1.12E-05 | 0.000352 |
| SNHG18    | 604.6333 | -0.73098 | 0.166664 | -4.38595 | 1.15E-05 | 0.000359 |
| ADAMTS2   | 1159.918 | -0.6905  | 0.15756  | -4.38244 | 1.17E-05 | 0.000363 |
| MIR612    | 823.6551 | -0.92988 | 0.212312 | -4.37976 | 1.19E-05 | 0.000366 |
| SYVN1     | 676.2711 | -0.90702 | 0.207583 | -4.36943 | 1.25E-05 | 0.000379 |
| YIPF2     | 369.3395 | -1.14929 | 0.263245 | -4.36584 | 1.27E-05 | 0.000384 |
| MOB3A     | 408.0526 | -0.85869 | 0.196704 | -4.36536 | 1.27E-05 | 0.000384 |
| COL27A1   | 382.5594 | -0.83131 | 0.190557 | -4.36251 | 1.29E-05 | 0.000387 |
| NCKAP5    | 273.901  | -0.70966 | 0.163222 | -4.34785 | 1.37E-05 | 0.000409 |
| MYADM     | 715.0736 | -0.60187 | 0.138479 | -4.34626 | 1.38E-05 | 0.00041  |
| SERINC2   | 172.7783 | -1.1107  | 0.255839 | -4.3414  | 1.42E-05 | 0.000417 |
| GOLGA3    | 4558.293 | -0.6983  | 0.160884 | -4.34038 | 1.42E-05 | 0.000418 |
| FSTL3     | 338.1476 | -0.77965 | 0.179827 | -4.33556 | 1.45E-05 | 0.000425 |
| FGF11     | 32.80289 | -1.67444 | 0.386472 | -4.33264 | 1.47E-05 | 0.000428 |
| RASA4B    | 189.3067 | -1.10391 | 0.255412 | -4.3221  | 1.55E-05 | 0.000444 |
| GPR146    | 40.11192 | -1.4267  | 0.330207 | -4.32062 | 1.56E-05 | 0.000446 |
| KDEL3     | 2583.997 | -0.78118 | 0.180895 | -4.3184  | 1.57E-05 | 0.000449 |
| ITGA5     | 2078.623 | -0.69356 | 0.160716 | -4.31542 | 1.59E-05 | 0.000455 |
| NADSYN1   | 938.9424 | -0.8787  | 0.2039   | -4.30945 | 1.64E-05 | 0.000463 |
| FHL2      | 1312.745 | -0.49839 | 0.115813 | -4.30339 | 1.68E-05 | 0.000472 |
| ADIRF-AS1 | 603.2364 | -0.8465  | 0.196957 | -4.29791 | 1.72E-05 | 0.000483 |
| meg3      | 33.95978 | -1.65985 | 0.386289 | -4.29692 | 1.73E-05 | 0.000483 |
| HMGCL     | 833.342  | -0.68697 | 0.160027 | -4.29281 | 1.76E-05 | 0.000491 |
| COL8A1    | 1109.898 | -0.5739  | 0.133789 | -4.28959 | 1.79E-05 | 0.000494 |
| MRPL17    | 1164.498 | -0.48519 | 0.113377 | -4.27942 | 1.87E-05 | 0.000514 |

|           |          |          |          |          |          |          |
|-----------|----------|----------|----------|----------|----------|----------|
| PGM5      | 183.1316 | -0.83032 | 0.194142 | -4.27685 | 1.90E-05 | 0.000517 |
| PACS1     | 1025.969 | -0.5657  | 0.132458 | -4.27079 | 1.95E-05 | 0.000529 |
| ACTR1B    | 801.8439 | -0.79827 | 0.187059 | -4.26748 | 1.98E-05 | 0.000535 |
| PLOD3     | 2129.092 | -0.91421 | 0.214418 | -4.26371 | 2.01E-05 | 0.000544 |
| SH3BP2    | 2678.39  | -0.58275 | 0.137017 | -4.2531  | 2.11E-05 | 0.000566 |
| FKBP10    | 3642.795 | -0.84405 | 0.198913 | -4.24329 | 2.20E-05 | 0.00059  |
| EPHA1-AS1 | 34.04119 | -1.67686 | 0.395707 | -4.23764 | 2.26E-05 | 0.000602 |
| MYO15B    | 46.56972 | -1.3783  | 0.32541  | -4.23557 | 2.28E-05 | 0.000605 |
| DDOST     | 5506.844 | -0.67729 | 0.159899 | -4.23572 | 2.28E-05 | 0.000605 |
| NAT6      | 88.48355 | -1.1648  | 0.275604 | -4.22636 | 2.38E-05 | 0.000626 |
| TMEM123   | 17631.77 | -0.56472 | 0.13386  | -4.21875 | 2.46E-05 | 0.000646 |
| GAS6      | 364.0141 | -0.93744 | 0.222261 | -4.21776 | 2.47E-05 | 0.000648 |
| GBE1      | 11987.82 | -0.65801 | 0.156107 | -4.21516 | 2.50E-05 | 0.000653 |
| MLLT3     | 165.3698 | -0.87631 | 0.208236 | -4.20823 | 2.57E-05 | 0.000667 |
| AMT       | 167.2453 | -0.93291 | 0.221838 | -4.20536 | 2.61E-05 | 0.000672 |
| RAI14     | 4841.384 | -0.54575 | 0.130012 | -4.19768 | 2.70E-05 | 0.000694 |
| OS9       | 5684.637 | -0.65735 | 0.156711 | -4.19467 | 2.73E-05 | 0.000701 |
| PFKL      | 2899.755 | -1.13773 | 0.271448 | -4.19135 | 2.77E-05 | 0.000709 |
| IL1RAP    | 1232.342 | -0.63526 | 0.151743 | -4.1864  | 2.83E-05 | 0.000721 |
| TGFA      | 38.10527 | -1.48292 | 0.355342 | -4.17322 | 3.00E-05 | 0.000756 |
| PDXK      | 2963.519 | -0.67438 | 0.161617 | -4.17273 | 3.01E-05 | 0.000757 |
| EFEMP2    | 1468.035 | -1.03356 | 0.248027 | -4.16713 | 3.08E-05 | 0.000773 |
| TRADD     | 340.3045 | -0.72914 | 0.175139 | -4.16321 | 3.14E-05 | 0.00078  |
| MAMDC4    | 116.3897 | -1.33591 | 0.321142 | -4.15988 | 3.18E-05 | 0.000785 |
| RCN3      | 197.1986 | -1.15288 | 0.277204 | -4.15898 | 3.20E-05 | 0.000786 |
| CRABP2    | 37.9649  | -1.5022  | 0.361885 | -4.15104 | 3.31E-05 | 0.000808 |
| PANX2     | 189.2192 | -0.88384 | 0.213059 | -4.14833 | 3.35E-05 | 0.000817 |
| GRK5      | 377.1527 | -0.639   | 0.154223 | -4.14332 | 3.42E-05 | 0.000833 |
| ITPR3     | 3005.562 | -0.71193 | 0.172348 | -4.13079 | 3.62E-05 | 0.000872 |
| SREBF2    | 3437.924 | -0.62459 | 0.151293 | -4.12834 | 3.65E-05 | 0.000877 |
| SBF2-AS1  | 292.9802 | -0.8857  | 0.214916 | -4.12114 | 3.77E-05 | 0.000901 |
| NACAD     | 104.7946 | -1.31737 | 0.320176 | -4.11453 | 3.88E-05 | 0.000923 |
| RGCC      | 57.65988 | -1.15603 | 0.282094 | -4.09802 | 4.17E-05 | 0.000984 |
| LTK       | 226.5819 | -0.9458  | 0.230824 | -4.09751 | 4.18E-05 | 0.000984 |
| MMP24     | 257.2253 | -0.85471 | 0.208803 | -4.09336 | 4.25E-05 | 0.001001 |
| man2b2    | 818.5064 | -0.5915  | 0.144551 | -4.09197 | 4.28E-05 | 0.001005 |
| MEGF6     | 137.8506 | -1.05047 | 0.256992 | -4.08754 | 4.36E-05 | 0.00102  |
| MRPL23-A  | 173.1935 | -1.25507 | 0.30748  | -4.0818  | 4.47E-05 | 0.001037 |
| NAALADL2  | 76.49377 | -1.06178 | 0.260759 | -4.07189 | 4.66E-05 | 0.001076 |
| CTDNEP1   | 789.7952 | -0.58869 | 0.14466  | -4.06948 | 4.71E-05 | 0.001086 |
| SZT2      | 2099.517 | -0.67137 | 0.165384 | -4.05947 | 4.92E-05 | 0.00112  |
| SMTN      | 517.4624 | -1.05051 | 0.258956 | -4.05671 | 4.98E-05 | 0.001131 |
| PKM       | 58549    | -0.60876 | 0.150097 | -4.05579 | 5.00E-05 | 0.001131 |
| GALNT2    | 3560.203 | -0.52047 | 0.128331 | -4.0557  | 5.00E-05 | 0.001131 |
| ECM1      | 1287.878 | -0.74993 | 0.184926 | -4.0553  | 5.01E-05 | 0.001132 |
| ALDH18A1  | 3402.199 | -0.56129 | 0.138531 | -4.05173 | 5.08E-05 | 0.001142 |
| FBLN1     | 298.1271 | -0.87748 | 0.216695 | -4.04936 | 5.14E-05 | 0.001152 |



|          |          |          |          |          |          |          |
|----------|----------|----------|----------|----------|----------|----------|
| TMED3    | 2153.18  | -0.73006 | 0.180508 | -4.04448 | 5.24E-05 | 0.001173 |
| SLC25A37 | 1878.597 | -0.68993 | 0.170634 | -4.04332 | 5.27E-05 | 0.001177 |
| CUL7     | 2635.298 | -1.00378 | 0.248314 | -4.04237 | 5.29E-05 | 0.00118  |
| SYNGR1   | 185.2251 | -0.79228 | 0.19601  | -4.04203 | 5.30E-05 | 0.00118  |
| ZNF175   | 461.8502 | -0.57927 | 0.14337  | -4.04039 | 5.34E-05 | 0.001184 |
| ACAD11   | 626.4823 | -0.53552 | 0.132593 | -4.03883 | 5.37E-05 | 0.001185 |
| MEF2D    | 595.1287 | -0.6277  | 0.155789 | -4.02919 | 5.60E-05 | 0.001229 |
| pcsk2    | 29.03759 | -1.56639 | 0.389085 | -4.02584 | 5.68E-05 | 0.001238 |
| TYMP     | 71.71138 | -1.40599 | 0.349248 | -4.02576 | 5.68E-05 | 0.001238 |
| HLA-E    | 4228.948 | -0.65202 | 0.161946 | -4.02616 | 5.67E-05 | 0.001238 |
| IQSEC1   | 498.3976 | -0.58524 | 0.145477 | -4.02292 | 5.75E-05 | 0.001248 |
| TBC1D9B  | 2996.553 | -0.63106 | 0.156905 | -4.02195 | 5.77E-05 | 0.001251 |
| C8orf58  | 264.7098 | -0.76662 | 0.190696 | -4.02011 | 5.82E-05 | 0.001259 |
| SEMA3B   | 201.2392 | -1.11132 | 0.276608 | -4.01768 | 5.88E-05 | 0.001269 |
| GSN      | 2184.936 | -0.912   | 0.226984 | -4.01789 | 5.87E-05 | 0.001269 |
| CAPS     | 51.33554 | -1.44551 | 0.359983 | -4.01548 | 5.93E-05 | 0.001274 |
| SNAI3    | 41.69829 | -1.32924 | 0.331086 | -4.01479 | 5.95E-05 | 0.001274 |
| MOGS     | 1273.255 | -0.83585 | 0.208181 | -4.01502 | 5.94E-05 | 0.001274 |
| PPFIBP1  | 3637.9   | -0.49668 | 0.123833 | -4.01092 | 6.05E-05 | 0.001293 |
| GHDC     | 234.2524 | -0.90006 | 0.224897 | -4.0021  | 6.28E-05 | 0.001329 |
| MAGED2   | 3211.556 | -0.72065 | 0.180274 | -3.99749 | 6.40E-05 | 0.001352 |
| SYNGR2   | 306.579  | -0.97194 | 0.24362  | -3.98957 | 6.62E-05 | 0.001394 |
| ERGIC1   | 4603.361 | -0.50635 | 0.127073 | -3.98468 | 6.76E-05 | 0.001417 |
| RRBP1    | 6891.823 | -0.55638 | 0.139665 | -3.98363 | 6.79E-05 | 0.001419 |
| CTAGE15  | 29.96307 | -1.73127 | 0.43466  | -3.98304 | 6.80E-05 | 0.001419 |
| SUMF1    | 512.1845 | -0.59436 | 0.149277 | -3.98162 | 6.84E-05 | 0.001424 |
| TMEM205  | 280.6314 | -0.72456 | 0.182014 | -3.98078 | 6.87E-05 | 0.001426 |
| SEC16A   | 2433.449 | -0.5883  | 0.148036 | -3.97406 | 7.07E-05 | 0.00146  |
| KIAA2013 | 833.4443 | -0.86164 | 0.216904 | -3.97244 | 7.11E-05 | 0.001464 |
| PICK1    | 97.72941 | -0.90298 | 0.227516 | -3.96888 | 7.22E-05 | 0.001484 |
| masp1    | 1998.905 | -0.80078 | 0.201912 | -3.96598 | 7.31E-05 | 0.001494 |
| CACNA2D2 | 83.44456 | -1.12369 | 0.283689 | -3.961   | 7.46E-05 | 0.00152  |
| CLK3     | 1115.399 | -0.64721 | 0.163463 | -3.95938 | 7.51E-05 | 0.001527 |
| POLD4    | 390.4818 | -0.73341 | 0.18529  | -3.95817 | 7.55E-05 | 0.00153  |
| ARRDC3   | 7459.228 | -0.61527 | 0.155572 | -3.95488 | 7.66E-05 | 0.001543 |
| DENND2A  | 84.14583 | -1.02911 | 0.260494 | -3.95061 | 7.80E-05 | 0.001567 |
| B4GALT7  | 416.8833 | -0.91171 | 0.231156 | -3.94415 | 8.01E-05 | 0.001597 |
| IGFBP2   | 655.8797 | -0.86451 | 0.21915  | -3.94483 | 7.99E-05 | 0.001597 |
| SEZ6L2   | 829.9183 | -0.99853 | 0.253197 | -3.94368 | 8.02E-05 | 0.001598 |
| NPC1     | 5913.442 | -0.43277 | 0.109922 | -3.93703 | 8.25E-05 | 0.001639 |
| SOX9     | 1407.282 | -0.45998 | 0.116876 | -3.93563 | 8.30E-05 | 0.001646 |
| TBC1D3B  | 252.4805 | -0.7633  | 0.194002 | -3.9345  | 8.34E-05 | 0.001652 |
| ARMCX3   | 2035.54  | -0.52128 | 0.132497 | -3.93423 | 8.35E-05 | 0.001652 |
| celsr3   | 1349.408 | -0.67146 | 0.17089  | -3.92918 | 8.52E-05 | 0.00168  |
| WDR45B   | 2544.889 | -0.47732 | 0.121654 | -3.92363 | 8.72E-05 | 0.001709 |
| LRPAP1   | 732.5183 | -0.85838 | 0.219054 | -3.91859 | 8.91E-05 | 0.001736 |
| NUDT22   | 335.9664 | -0.99463 | 0.253932 | -3.91691 | 8.97E-05 | 0.001744 |

|           |          |          |          |          |          |          |
|-----------|----------|----------|----------|----------|----------|----------|
| LOC10013  | 81.08625 | -1.08921 | 0.278171 | -3.9156  | 9.02E-05 | 0.001751 |
| ZNF469    | 281.5509 | -0.75433 | 0.19302  | -3.90802 | 9.31E-05 | 0.001793 |
| ELMSAN1   | 977.1904 | -0.46836 | 0.119875 | -3.90704 | 9.34E-05 | 0.001798 |
| c16orf58  | 1338.185 | -0.90109 | 0.230819 | -3.90388 | 9.47E-05 | 0.001818 |
| LMAN2     | 2276.579 | -0.81936 | 0.210035 | -3.90108 | 9.58E-05 | 0.001836 |
| LOC10013  | 89.02648 | -1.07196 | 0.274864 | -3.89995 | 9.62E-05 | 0.001838 |
| RN7SL1    | 439667.7 | -0.93673 | 0.240856 | -3.88916 | 0.000101 | 0.001905 |
| TLN1      | 8138.218 | -0.57639 | 0.148254 | -3.88788 | 0.000101 | 0.001908 |
| RARA      | 388.1533 | -0.68707 | 0.176808 | -3.88596 | 0.000102 | 0.001917 |
| TBC1D3H   | 378.8471 | -0.66646 | 0.171497 | -3.88611 | 0.000102 | 0.001917 |
| HEG1      | 9011.813 | -0.49662 | 0.127794 | -3.88607 | 0.000102 | 0.001917 |
| CTSA      | 3332.363 | -0.58448 | 0.150422 | -3.88559 | 0.000102 | 0.001917 |
| NIPAL3    | 1256.955 | -0.65004 | 0.167725 | -3.87564 | 0.000106 | 0.001983 |
| PGAM4     | 1400.264 | -0.54951 | 0.141865 | -3.87345 | 0.000107 | 0.001998 |
| QPCTL     | 264.8592 | -0.95568 | 0.247126 | -3.86719 | 0.00011  | 0.002038 |
| KIF16B    | 1607.923 | -0.52819 | 0.136703 | -3.86378 | 0.000112 | 0.002062 |
| CIB1      | 637.9511 | -0.76063 | 0.196956 | -3.86195 | 0.000112 | 0.002074 |
| FAM20A    | 89.20873 | -0.93464 | 0.242115 | -3.86032 | 0.000113 | 0.00208  |
| PDGFC     | 205.8105 | -0.66086 | 0.171814 | -3.84635 | 0.00012  | 0.00218  |
| SOGA1     | 1778.786 | -0.58056 | 0.151288 | -3.83745 | 0.000124 | 0.002245 |
| MYH7B     | 97.47498 | -0.92704 | 0.24183  | -3.83343 | 0.000126 | 0.002274 |
| LAMB1     | 66119.84 | -0.44149 | 0.115178 | -3.83314 | 0.000127 | 0.002274 |
| SIL1      | 917.6453 | -0.60262 | 0.157281 | -3.83152 | 0.000127 | 0.002283 |
| EDEM2     | 912.0593 | -0.5195  | 0.135602 | -3.83105 | 0.000128 | 0.002285 |
| CPA4      | 606.8518 | -0.9444  | 0.24697  | -3.82394 | 0.000131 | 0.00233  |
| c21orf2   | 264.1682 | -0.78549 | 0.205468 | -3.82293 | 0.000132 | 0.002337 |
| SLC2A3    | 4274.743 | -0.86827 | 0.227432 | -3.8177  | 0.000135 | 0.002382 |
| SORBS3    | 615.4947 | -0.87037 | 0.228117 | -3.81547 | 0.000136 | 0.002401 |
| CDCP1     | 82.54528 | -0.91746 | 0.240607 | -3.81311 | 0.000137 | 0.002403 |
| ppdpf     | 293.1162 | -0.8787  | 0.230457 | -3.81285 | 0.000137 | 0.002403 |
| CSRP2     | 396.5355 | -0.54882 | 0.143925 | -3.81324 | 0.000137 | 0.002403 |
| P3H1      | 4506.041 | -0.62606 | 0.164462 | -3.80672 | 0.000141 | 0.002451 |
| APLP1     | 400.4814 | -0.63736 | 0.167443 | -3.80642 | 0.000141 | 0.002451 |
| CARNS1    | 31.55838 | -1.52103 | 0.399958 | -3.80298 | 0.000143 | 0.002473 |
| PRDX4     | 2234.547 | -0.43759 | 0.115166 | -3.79966 | 0.000145 | 0.002491 |
| ZDHHC9    | 1194.267 | -0.49075 | 0.129229 | -3.79754 | 0.000146 | 0.002509 |
| LRSAM1    | 322.1548 | -0.62121 | 0.163633 | -3.79635 | 0.000147 | 0.002519 |
| LOC79160  | 31.90932 | -1.53659 | 0.405523 | -3.78916 | 0.000151 | 0.00257  |
| FCHSD1    | 551.0612 | -0.71211 | 0.187924 | -3.78933 | 0.000151 | 0.00257  |
| SEC24D    | 5046.381 | -0.51797 | 0.136715 | -3.78868 | 0.000151 | 0.002572 |
| SNAI3-AS1 | 160.1281 | -0.73735 | 0.194695 | -3.78722 | 0.000152 | 0.002584 |
| IRS1      | 3260.224 | -0.40586 | 0.107283 | -3.78307 | 0.000155 | 0.002622 |
| LDHA      | 43449.19 | -0.63385 | 0.16766  | -3.7806  | 0.000156 | 0.002642 |
| CHPF      | 510.7149 | -1.12429 | 0.297529 | -3.77874 | 0.000158 | 0.002659 |
| IMPDH1    | 1227.287 | -0.78225 | 0.207044 | -3.77818 | 0.000158 | 0.002659 |
| LASP1     | 5811.98  | -0.41981 | 0.111353 | -3.77011 | 0.000163 | 0.002732 |
| OBSCN     | 1006.775 | -0.87616 | 0.232461 | -3.76905 | 0.000164 | 0.002738 |

|           |          |          |          |          |          |          |
|-----------|----------|----------|----------|----------|----------|----------|
| FBXL8     | 48.38733 | -1.41707 | 0.37614  | -3.76739 | 0.000165 | 0.002753 |
| LOC1      | 210.3195 | -0.63094 | 0.167832 | -3.75937 | 0.00017  | 0.002827 |
| DTX3      | 457.4431 | -0.76148 | 0.203336 | -3.74493 | 0.00018  | 0.00296  |
| NFIL3     | 1784.449 | -0.53255 | 0.142245 | -3.74391 | 0.000181 | 0.002966 |
| RARRES1   | 291.7405 | -0.85642 | 0.228835 | -3.74251 | 0.000182 | 0.002979 |
| KCNK6     | 22.37796 | -1.70071 | 0.454651 | -3.7407  | 0.000184 | 0.002995 |
| S100A10   | 2842.718 | -0.44988 | 0.120309 | -3.7394  | 0.000184 | 0.003004 |
| TMEM134   | 115.8317 | -1.27261 | 0.34056  | -3.7368  | 0.000186 | 0.003032 |
| rab11fip5 | 1090.592 | -0.66388 | 0.177691 | -3.73612 | 0.000187 | 0.003033 |
| WFDC13    | 11.19862 | -2.64868 | 0.709227 | -3.7346  | 0.000188 | 0.003042 |
| DENND3    | 270.742  | -0.67629 | 0.181141 | -3.73348 | 0.000189 | 0.003053 |
| SDHA      | 4628.355 | -0.51025 | 0.136869 | -3.72806 | 0.000193 | 0.003103 |
| SPTLC3    | 704.2632 | -0.60247 | 0.161686 | -3.72616 | 0.000194 | 0.003123 |
| WNT5B     | 1859.565 | -0.49823 | 0.133891 | -3.72112 | 0.000198 | 0.003173 |
| fank1     | 84.21947 | -0.99062 | 0.266456 | -3.71777 | 0.000201 | 0.003209 |
| RN7SL2    | 410814.3 | -0.88567 | 0.238526 | -3.71308 | 0.000205 | 0.003253 |
| ITGB3     | 1478.106 | -0.53146 | 0.14317  | -3.71212 | 0.000206 | 0.003261 |
| RRAS      | 391.2628 | -1.00527 | 0.270924 | -3.71052 | 0.000207 | 0.003275 |
| LOXL3     | 172.4761 | -0.71785 | 0.193454 | -3.71071 | 0.000207 | 0.003275 |
| TLDC1     | 1086.26  | -0.43229 | 0.116543 | -3.70927 | 0.000208 | 0.003285 |
| PLAT      | 233.9428 | -0.77372 | 0.208641 | -3.70836 | 0.000209 | 0.003292 |
| PRKCSH    | 2531.014 | -0.71183 | 0.192016 | -3.70717 | 0.00021  | 0.003298 |
| LTBP4     | 283.2046 | -1.08774 | 0.293624 | -3.70455 | 0.000212 | 0.003326 |
| P3H3      | 875.6297 | -0.9459  | 0.255514 | -3.70193 | 0.000214 | 0.003357 |
| TRIOBP    | 1190.287 | -0.65986 | 0.178525 | -3.69615 | 0.000219 | 0.003427 |
| POM121C   | 1141.282 | -0.41992 | 0.113819 | -3.68935 | 0.000225 | 0.003502 |
| LCAT      | 127.6712 | -0.83492 | 0.226365 | -3.68838 | 0.000226 | 0.003512 |
| ATP2B4    | 4693.028 | -0.49646 | 0.134689 | -3.68599 | 0.000228 | 0.003542 |
| MYH9      | 20306.46 | -0.58427 | 0.158732 | -3.68086 | 0.000232 | 0.0036   |
| ASIC4     | 21.11674 | -1.71839 | 0.467169 | -3.6783  | 0.000235 | 0.003621 |
| CD151     | 4404.363 | -0.9213  | 0.25046  | -3.67844 | 0.000235 | 0.003621 |
| BDKRB2    | 99.52329 | -0.94648 | 0.257703 | -3.67275 | 0.00024  | 0.003689 |
| MAPK7     | 233.4875 | -0.9056  | 0.246563 | -3.67289 | 0.00024  | 0.003689 |
| METTL26   | 398.4268 | -0.83516 | 0.227394 | -3.67276 | 0.00024  | 0.003689 |
| METTL21B  | 590.9876 | -0.5667  | 0.154461 | -3.66886 | 0.000244 | 0.003735 |
| CTAGE4    | 18.43917 | -1.98576 | 0.541393 | -3.66787 | 0.000245 | 0.003746 |
| ICAM5     | 17.95488 | -1.91631 | 0.522611 | -3.66681 | 0.000246 | 0.003756 |
| MGLL      | 378.2105 | -0.75379 | 0.205601 | -3.66626 | 0.000246 | 0.003758 |
| CLK1      | 1299.815 | -0.51053 | 0.139323 | -3.66436 | 0.000248 | 0.003773 |
| PDIA3P1   | 5326.397 | -0.40734 | 0.111166 | -3.66424 | 0.000248 | 0.003773 |
| MEF2A     | 2541.407 | -0.49191 | 0.134366 | -3.66099 | 0.000251 | 0.003802 |
| LOC10028  | 127.2575 | -0.88974 | 0.243227 | -3.65806 | 0.000254 | 0.003835 |
| GPRIN3    | 186.7854 | -0.70859 | 0.193708 | -3.65802 | 0.000254 | 0.003835 |
| LOC10027  | 54.34175 | -1.19479 | 0.326731 | -3.6568  | 0.000255 | 0.003842 |
| NCOR2     | 699.393  | -0.78527 | 0.214892 | -3.65424 | 0.000258 | 0.00387  |
| COL6A1    | 3780.96  | -0.86232 | 0.236212 | -3.65062 | 0.000262 | 0.003913 |
| NALCN     | 289.8134 | -0.56838 | 0.15569  | -3.65072 | 0.000262 | 0.003913 |

|           |          |          |          |          |          |          |
|-----------|----------|----------|----------|----------|----------|----------|
| KCNQ1OT1  | 3035.825 | -0.60008 | 0.164511 | -3.64765 | 0.000265 | 0.003951 |
| Snora5c   | 84.64525 | -1.17084 | 0.321023 | -3.64721 | 0.000265 | 0.003954 |
| RHBDF2    | 333.0835 | -0.75437 | 0.207048 | -3.64344 | 0.000269 | 0.004001 |
| CHRM2     | 107.039  | -0.89217 | 0.245009 | -3.64139 | 0.000271 | 0.004025 |
| MAGED1    | 5722.749 | -0.67098 | 0.184347 | -3.63978 | 0.000273 | 0.004046 |
| OST4      | 599.8014 | -0.6547  | 0.179908 | -3.63909 | 0.000274 | 0.004053 |
| LDHD      | 21.44717 | -1.62268 | 0.445964 | -3.63859 | 0.000274 | 0.004057 |
| INF2      | 316.6303 | -0.81684 | 0.224646 | -3.63614 | 0.000277 | 0.004088 |
| UBE2O     | 1869.815 | -0.63201 | 0.173951 | -3.63326 | 0.00028  | 0.004119 |
| GNAS      | 22945.05 | -0.44541 | 0.122613 | -3.63265 | 0.000281 | 0.004124 |
| STARD4-A  | 432.7792 | -0.57295 | 0.157811 | -3.6306  | 0.000283 | 0.004149 |
| GMPPA     | 1193.086 | -0.60738 | 0.167433 | -3.62763 | 0.000286 | 0.004189 |
| SLC1A1    | 658.581  | -0.50284 | 0.138741 | -3.62429 | 0.00029  | 0.004228 |
| herc3     | 2348.615 | -0.45308 | 0.125007 | -3.62445 | 0.00029  | 0.004228 |
| FOX L1    | 78.70931 | -0.92127 | 0.25428  | -3.62307 | 0.000291 | 0.00424  |
| NUCB1     | 2513.149 | -0.83229 | 0.230302 | -3.61388 | 0.000302 | 0.004376 |
| NFIX      | 1446.762 | -0.50363 | 0.139467 | -3.61108 | 0.000305 | 0.00442  |
| slc26a6   | 772.0484 | -0.61286 | 0.169764 | -3.61008 | 0.000306 | 0.004429 |
| PSG5      | 176.9936 | -0.85177 | 0.236122 | -3.60733 | 0.000309 | 0.004463 |
| EVA1B     | 72.98438 | -1.1188  | 0.310208 | -3.60663 | 0.00031  | 0.004471 |
| LOC100501 | 45.14751 | -1.1884  | 0.32965  | -3.60504 | 0.000312 | 0.004482 |
| MTMR11    | 536.3176 | -0.62925 | 0.174537 | -3.60522 | 0.000312 | 0.004482 |
| SURF4     | 6461.554 | -0.45034 | 0.124907 | -3.60541 | 0.000312 | 0.004482 |
| SYNPO     | 678.9082 | -0.6384  | 0.177116 | -3.60441 | 0.000313 | 0.004488 |
| NAV2      | 615.9153 | -0.81094 | 0.225161 | -3.60158 | 0.000316 | 0.004517 |
| ZMIZ1     | 2165.034 | -0.60764 | 0.168711 | -3.60167 | 0.000316 | 0.004517 |
| ACADVL    | 5594.581 | -0.55331 | 0.153614 | -3.60197 | 0.000316 | 0.004517 |
| PNCK      | 17.34919 | -1.93763 | 0.538063 | -3.60112 | 0.000317 | 0.00452  |
| DHRS3     | 163.1856 | -0.91458 | 0.25426  | -3.59702 | 0.000322 | 0.004584 |
| TTC28     | 53.68117 | -1.02908 | 0.286179 | -3.59594 | 0.000323 | 0.004596 |
| LOC148691 | 98.90188 | -0.83338 | 0.231886 | -3.59391 | 0.000326 | 0.004613 |
| C1R       | 7439.401 | -0.70777 | 0.196929 | -3.59406 | 0.000326 | 0.004613 |
| SLC16A2   | 1230.296 | -0.45309 | 0.126129 | -3.59225 | 0.000328 | 0.004634 |
| LOC729731 | 39.71613 | -1.24566 | 0.3468   | -3.59187 | 0.000328 | 0.004637 |
| DNAJB2    | 612.7659 | -0.81388 | 0.226839 | -3.5879  | 0.000333 | 0.004687 |
| SGIP1     | 22.3798  | -1.58134 | 0.440954 | -3.58619 | 0.000336 | 0.004708 |
| DAP       | 1542.721 | -0.40532 | 0.113079 | -3.58444 | 0.000338 | 0.004728 |
| WDR60     | 1029.728 | -0.42714 | 0.119181 | -3.58399 | 0.000338 | 0.004732 |
| FAM129B   | 2761.911 | -0.85468 | 0.23854  | -3.58296 | 0.00034  | 0.004746 |
| SNTA1     | 520.9644 | -0.80165 | 0.22405  | -3.578   | 0.000346 | 0.004815 |
| NKD2      | 43.65648 | -1.29503 | 0.362086 | -3.57659 | 0.000348 | 0.004833 |
| LINC00842 | 559.4271 | -0.74092 | 0.207299 | -3.57413 | 0.000351 | 0.004865 |
| DBP       | 188.7795 | -0.72792 | 0.20365  | -3.57434 | 0.000351 | 0.004865 |
| qsox1     | 1716.596 | -0.7524  | 0.210699 | -3.57098 | 0.000356 | 0.004911 |
| SH3BGRL3  | 1369.148 | -0.55074 | 0.154219 | -3.57113 | 0.000355 | 0.004911 |
| MANF      | 1874.716 | -0.46439 | 0.130105 | -3.56935 | 0.000358 | 0.004937 |
| DDIT4     | 3360.799 | -0.79483 | 0.222749 | -3.56827 | 0.000359 | 0.004944 |

|           |          |          |          |          |          |          |
|-----------|----------|----------|----------|----------|----------|----------|
| TRIM46    | 33.96149 | -1.35988 | 0.381359 | -3.56587 | 0.000363 | 0.004963 |
| SERF2     | 3518.631 | -0.85138 | 0.238741 | -3.56611 | 0.000362 | 0.004963 |
| DDX41     | 1547.942 | -0.59553 | 0.16703  | -3.56543 | 0.000363 | 0.004963 |
| FAM114A1  | 4628.579 | -0.48738 | 0.136803 | -3.56264 | 0.000367 | 0.005002 |
| MEGF8     | 1014.196 | -0.68753 | 0.193101 | -3.56046 | 0.00037  | 0.005021 |
| GUSBP3    | 1198.185 | -0.4025  | 0.113053 | -3.56026 | 0.00037  | 0.005021 |
| HLA-C     | 6906.51  | -0.68184 | 0.191785 | -3.55521 | 0.000378 | 0.005103 |
| GPRC5A    | 524.0093 | -0.75617 | 0.212859 | -3.55245 | 0.000382 | 0.005146 |
| INHA      | 31.55672 | -1.43633 | 0.404706 | -3.54906 | 0.000387 | 0.005203 |
| PHPT1     | 491.1634 | -0.94646 | 0.2669   | -3.54611 | 0.000391 | 0.005245 |
| ap1g2     | 484.5763 | -0.70213 | 0.198013 | -3.54586 | 0.000391 | 0.005245 |
| UCKL1-AS1 | 55.51636 | -1.03177 | 0.291036 | -3.54515 | 0.000392 | 0.005254 |
| WFS1      | 357.5759 | -0.81648 | 0.230728 | -3.53873 | 0.000402 | 0.00535  |
| PDGFRB    | 5088.145 | -0.63419 | 0.179209 | -3.53884 | 0.000402 | 0.00535  |
| PGRMC2    | 1317.273 | -0.53305 | 0.150691 | -3.53734 | 0.000404 | 0.005369 |
| ATN1      | 536.697  | -0.55086 | 0.155968 | -3.53188 | 0.000413 | 0.005467 |
| ZBTB25    | 167.8202 | -0.63921 | 0.181001 | -3.53151 | 0.000413 | 0.005468 |
| RPN2      | 13971.69 | -0.39547 | 0.111995 | -3.53113 | 0.000414 | 0.005468 |
| MYO1C     | 3810.625 | -0.65941 | 0.186767 | -3.53065 | 0.000415 | 0.005469 |
| BCAR1     | 752.0597 | -0.90371 | 0.256288 | -3.52613 | 0.000422 | 0.005549 |
| MICA      | 561.8252 | -0.51708 | 0.146714 | -3.52442 | 0.000424 | 0.005581 |
| TLE6      | 41.94673 | -1.27196 | 0.360991 | -3.52354 | 0.000426 | 0.005581 |
| AGAP1     | 633.5407 | -0.49846 | 0.141484 | -3.52308 | 0.000427 | 0.005581 |
| CLSTN1    | 2255.864 | -0.51531 | 0.146281 | -3.52276 | 0.000427 | 0.005582 |
| CST3      | 1565.647 | -0.91247 | 0.259104 | -3.52163 | 0.000429 | 0.005597 |
| AFMID     | 405.2743 | -0.61177 | 0.1738   | -3.51998 | 0.000432 | 0.005622 |
| GDPD3     | 70.48606 | -1.03874 | 0.295207 | -3.51869 | 0.000434 | 0.005638 |
| POFUT2    | 2775.418 | -0.65396 | 0.18586  | -3.51858 | 0.000434 | 0.005638 |
| TBC1D22A  | 574.2524 | -0.59546 | 0.169468 | -3.5137  | 0.000442 | 0.005714 |
| ABLIM1    | 190.2782 | -0.81389 | 0.23172  | -3.51239 | 0.000444 | 0.005737 |
| RIPK4     | 475.797  | -0.47961 | 0.136566 | -3.51196 | 0.000445 | 0.005741 |
| IGFBP7    | 855.1381 | -0.57502 | 0.163938 | -3.50756 | 0.000452 | 0.005827 |
| POLR2A    | 2071.225 | -0.64129 | 0.183018 | -3.50399 | 0.000458 | 0.005896 |
| PTGS2     | 16.68617 | -1.8698  | 0.533933 | -3.50193 | 0.000462 | 0.005934 |
| BOK       | 102.1943 | -0.85061 | 0.242916 | -3.50166 | 0.000462 | 0.005934 |
| TPI1P3    | 126.2673 | -0.73846 | 0.210987 | -3.50003 | 0.000465 | 0.005965 |
| HERPUD1   | 2681.588 | -0.62918 | 0.180122 | -3.4931  | 0.000477 | 0.006076 |
| SLC12A4   | 1421.969 | -0.70961 | 0.203168 | -3.49274 | 0.000478 | 0.006079 |
| TERC      | 105.0191 | -1.09326 | 0.313289 | -3.48962 | 0.000484 | 0.006131 |
| RHCE      | 29.98673 | -1.49013 | 0.42732  | -3.48717 | 0.000488 | 0.006172 |
| BMP1      | 693.8709 | -0.71923 | 0.20658  | -3.48162 | 0.000498 | 0.006286 |
| PNRC1     | 1461.47  | -0.51417 | 0.147831 | -3.47806 | 0.000505 | 0.006344 |
| INHBB     | 85.96542 | -0.92318 | 0.265481 | -3.4774  | 0.000506 | 0.006354 |
| SLC39A13  | 367.3939 | -0.94664 | 0.272387 | -3.47535 | 0.00051  | 0.006398 |
| LPAR2     | 53.42417 | -1.07404 | 0.309105 | -3.47468 | 0.000511 | 0.006404 |
| LINC01116 | 462.9017 | -0.49113 | 0.141363 | -3.47426 | 0.000512 | 0.006408 |
| DNASE1L1  | 423.5449 | -0.92106 | 0.265191 | -3.47319 | 0.000514 | 0.006429 |

|           |          |          |          |          |          |          |
|-----------|----------|----------|----------|----------|----------|----------|
| LOC10050  | 412.5254 | -0.80108 | 0.230698 | -3.47243 | 0.000516 | 0.006437 |
| HSD3B7    | 247.5376 | -0.83174 | 0.239859 | -3.46764 | 0.000525 | 0.006526 |
| EPN2      | 446.5527 | -0.65868 | 0.19008  | -3.46529 | 0.00053  | 0.006578 |
| GLG1      | 7865.886 | -0.37014 | 0.106859 | -3.46381 | 0.000533 | 0.006604 |
| ACBD4     | 184.4112 | -0.98754 | 0.285174 | -3.46293 | 0.000534 | 0.00662  |
| MAN1B1    | 1399.1   | -0.76896 | 0.222568 | -3.45493 | 0.00055  | 0.006787 |
| rasa4     | 353.3583 | -0.84306 | 0.244399 | -3.44954 | 0.000562 | 0.006891 |
| EFHD2     | 640.3566 | -0.57818 | 0.16761  | -3.44956 | 0.000562 | 0.006891 |
| MYL6B     | 965.9127 | -0.64624 | 0.18739  | -3.44865 | 0.000563 | 0.006908 |
| TAGLN     | 58.04873 | -0.95865 | 0.278026 | -3.44807 | 0.000565 | 0.006911 |
| FBXL16    | 227.8146 | -0.64031 | 0.185762 | -3.44694 | 0.000567 | 0.00693  |
| ACSS1     | 220.641  | -0.72654 | 0.211053 | -3.44247 | 0.000576 | 0.007023 |
| HS6ST3    | 705.6427 | -0.67929 | 0.197405 | -3.44111 | 0.000579 | 0.007036 |
| fbIn7     | 314.2906 | -0.64866 | 0.188502 | -3.44116 | 0.000579 | 0.007036 |
| NPRL3     | 252.3265 | -0.67365 | 0.195821 | -3.44011 | 0.000581 | 0.007057 |
| GRN       | 1943.604 | -0.88938 | 0.258752 | -3.43718 | 0.000588 | 0.007122 |
| 43526     | 134.2001 | -0.77086 | 0.22469  | -3.43079 | 0.000602 | 0.007258 |
| MYRF      | 182.6129 | -0.69232 | 0.201784 | -3.43098 | 0.000601 | 0.007258 |
| TBC1D3C   | 355.4122 | -0.5593  | 0.163104 | -3.42913 | 0.000606 | 0.007283 |
| C14orf132 | 568.3235 | -0.46593 | 0.135878 | -3.42901 | 0.000606 | 0.007283 |
| mrc2      | 7318.888 | -0.86326 | 0.251854 | -3.42763 | 0.000609 | 0.007314 |
| PLA2G6    | 108.8034 | -0.79954 | 0.233457 | -3.42477 | 0.000615 | 0.00734  |
| FNTB      | 257.7576 | -0.59668 | 0.174223 | -3.42483 | 0.000615 | 0.00734  |
| YEATS2    | 3807.93  | -0.36675 | 0.107116 | -3.42387 | 0.000617 | 0.007359 |
| TMEM94    | 955.2598 | -0.79917 | 0.233945 | -3.41607 | 0.000635 | 0.00755  |
| TCEAL3    | 554.9894 | -0.45597 | 0.133809 | -3.40758 | 0.000655 | 0.007765 |
| NENF      | 886.8679 | -0.51545 | 0.151334 | -3.40602 | 0.000659 | 0.007797 |
| GGCX      | 873.7479 | -0.44778 | 0.131539 | -3.40417 | 0.000664 | 0.007826 |
| NOMO2     | 8265.099 | -0.37955 | 0.11153  | -3.40309 | 0.000666 | 0.007847 |
| abca2     | 858.508  | -0.87183 | 0.256345 | -3.40102 | 0.000671 | 0.007888 |
| RPS16     | 1031.693 | -0.62232 | 0.182972 | -3.40116 | 0.000671 | 0.007888 |
| RAB11B    | 160.2597 | -0.92796 | 0.273046 | -3.39855 | 0.000677 | 0.007922 |
| znf526    | 303.8375 | -0.53594 | 0.157873 | -3.39474 | 0.000687 | 0.008003 |
| SPOCK1    | 1200.118 | -0.71531 | 0.210762 | -3.39394 | 0.000689 | 0.008015 |
| GALNS     | 662.4957 | -0.54825 | 0.161561 | -3.39343 | 0.00069  | 0.008024 |
| MTFP1     | 282.1297 | -0.73108 | 0.215597 | -3.39093 | 0.000697 | 0.008079 |
| SLC10A3   | 316.2018 | -0.77199 | 0.22772  | -3.39008 | 0.000699 | 0.008091 |
| MLPH      | 1172.247 | -0.61554 | 0.181581 | -3.38989 | 0.000699 | 0.008091 |
| CCDC142   | 267.1914 | -0.63733 | 0.188119 | -3.38789 | 0.000704 | 0.008132 |
| SEMA4A    | 59.35154 | -1.09627 | 0.324019 | -3.38336 | 0.000716 | 0.008242 |
| PRRT2     | 113.3126 | -1.03238 | 0.305193 | -3.38271 | 0.000718 | 0.008244 |
| PRPS2     | 2208.678 | -0.45285 | 0.13392  | -3.38145 | 0.000721 | 0.008269 |
| NLRX1     | 233.4109 | -0.80081 | 0.237063 | -3.37805 | 0.00073  | 0.008341 |
| CALCOCO1  | 1171.335 | -0.60936 | 0.180594 | -3.37422 | 0.00074  | 0.008433 |
| ADGRE5    | 639.902  | -0.56879 | 0.168631 | -3.37297 | 0.000744 | 0.008459 |
| GUSBP2    | 653.9848 | -0.4747  | 0.140855 | -3.37012 | 0.000751 | 0.008522 |
| TNNT1     | 640.5988 | -0.78673 | 0.233623 | -3.36753 | 0.000758 | 0.008584 |

|           |          |          |          |          |          |          |
|-----------|----------|----------|----------|----------|----------|----------|
| WASH5P    | 467.9653 | -0.50777 | 0.150892 | -3.36515 | 0.000765 | 0.008639 |
| LAMB2P1   | 50.60478 | -1.11504 | 0.331465 | -3.36398 | 0.000768 | 0.008669 |
| THBS3     | 401.2966 | -0.5656  | 0.168286 | -3.36094 | 0.000777 | 0.008746 |
| natd1     | 123.3294 | -0.73044 | 0.217569 | -3.35729 | 0.000787 | 0.008843 |
| PDGFD     | 6401.766 | -0.44255 | 0.132037 | -3.35173 | 0.000803 | 0.009006 |
| CACNB1    | 177.7162 | -0.68194 | 0.203531 | -3.35056 | 0.000806 | 0.009022 |
| NLRP1     | 488.7181 | -0.49086 | 0.1465   | -3.3506  | 0.000806 | 0.009022 |
| HLA-H     | 1625.344 | -0.92227 | 0.275365 | -3.34928 | 0.00081  | 0.00905  |
| TPM2      | 4625.552 | -0.51776 | 0.154682 | -3.34729 | 0.000816 | 0.009096 |
| PADI3     | 333.3426 | -0.61412 | 0.183569 | -3.34543 | 0.000822 | 0.009144 |
| SEC13     | 3175.434 | -0.54081 | 0.161758 | -3.34335 | 0.000828 | 0.009189 |
| ARHGEF37  | 54.39463 | -1.03098 | 0.308609 | -3.34072 | 0.000836 | 0.009215 |
| IGFBP1    | 349.6875 | -0.80443 | 0.240784 | -3.34089 | 0.000835 | 0.009215 |
| MIER2     | 270.4107 | -0.79841 | 0.238972 | -3.34103 | 0.000835 | 0.009215 |
| LOC10029  | 124.5932 | -0.69153 | 0.207028 | -3.3403  | 0.000837 | 0.009215 |
| GADD45B   | 506.3176 | -0.45984 | 0.137666 | -3.34028 | 0.000837 | 0.009215 |
| PPP1R3G   | 11.27625 | -2.18689 | 0.655076 | -3.33838 | 0.000843 | 0.009265 |
| ZNF521    | 1333.601 | -0.40651 | 0.121804 | -3.33739 | 0.000846 | 0.009292 |
| RNMT      | 1797.977 | -0.50022 | 0.149899 | -3.33708 | 0.000847 | 0.009296 |
| TUBB3     | 1056.01  | -0.78503 | 0.235503 | -3.3334  | 0.000858 | 0.009397 |
| LINC01002 | 28.63077 | -1.39927 | 0.420064 | -3.3311  | 0.000865 | 0.009464 |
| CAMTA2    | 425.7898 | -0.56743 | 0.170412 | -3.32977 | 0.000869 | 0.009496 |
| KMT2D     | 1588.959 | -0.52208 | 0.157017 | -3.32501 | 0.000884 | 0.009605 |
| FAM3A     | 336.6924 | -0.80756 | 0.242957 | -3.32387 | 0.000888 | 0.009638 |
| CD1D      | 386.358  | -0.55386 | 0.1668   | -3.32048 | 0.000899 | 0.009724 |
| RHOBTB1   | 834.9985 | -0.42104 | 0.126793 | -3.32074 | 0.000898 | 0.009724 |
| SSR4      | 1595.028 | -0.66258 | 0.199648 | -3.31873 | 0.000904 | 0.009775 |
| SPANXC    | 141.559  | -0.84122 | 0.253507 | -3.31832 | 0.000906 | 0.009779 |
| TRO       | 480.8702 | -0.75554 | 0.227829 | -3.31628 | 0.000912 | 0.00982  |
| MFSD12    | 386.7774 | -0.73894 | 0.222819 | -3.31634 | 0.000912 | 0.00982  |
| DUOX1     | 64.10801 | -0.9306  | 0.280737 | -3.31484 | 0.000917 | 0.00986  |
| SERINC4   | 182.4304 | -0.66522 | 0.200711 | -3.3143  | 0.000919 | 0.009863 |
| SEC61A1   | 6521.184 | -0.41217 | 0.124358 | -3.31441 | 0.000918 | 0.009863 |
| ARHGAP22  | 175.96   | -0.66326 | 0.200432 | -3.30913 | 0.000936 | 0.010012 |
| SNTB1     | 945.5723 | -0.42412 | 0.128352 | -3.30432 | 0.000952 | 0.010152 |
| GGT7      | 494.8536 | -0.71821 | 0.217448 | -3.3029  | 0.000957 | 0.010187 |
| VAMP2     | 306.0474 | -0.52641 | 0.159535 | -3.29965 | 0.000968 | 0.010299 |
| FPR3      | 28.01569 | -1.46466 | 0.444077 | -3.29822 | 0.000973 | 0.010342 |
| LOC44030  | 421.964  | -0.54705 | 0.165889 | -3.29766 | 0.000975 | 0.010351 |
| TRAF3IP2  | 616.6851 | -0.43294 | 0.131305 | -3.29722 | 0.000976 | 0.010353 |
| FAM127A   | 1406.038 | -0.62558 | 0.189745 | -3.29697 | 0.000977 | 0.010353 |
| TMEM198   | 130.3372 | -0.69866 | 0.211997 | -3.2956  | 0.000982 | 0.010391 |
| TOM1      | 536.2537 | -0.81111 | 0.246151 | -3.29517 | 0.000984 | 0.010399 |
| ercc1     | 919.2246 | -0.51977 | 0.157754 | -3.29482 | 0.000985 | 0.010399 |
| LAMB2     | 1677.706 | -0.81671 | 0.247929 | -3.29413 | 0.000987 | 0.010406 |
| ILVBL     | 493.4303 | -0.6644  | 0.201697 | -3.29404 | 0.000988 | 0.010406 |
| TRPM4     | 109.1683 | -0.90277 | 0.274196 | -3.29242 | 0.000993 | 0.010452 |

|          |          |          |          |          |          |          |
|----------|----------|----------|----------|----------|----------|----------|
| AFAP1    | 1059.997 | -0.40195 | 0.12214  | -3.29084 | 0.000999 | 0.010504 |
| CLIP3    | 122.0922 | -0.75204 | 0.228964 | -3.28452 | 0.001022 | 0.010684 |
| KDELR1   | 2861.758 | -0.52963 | 0.161438 | -3.28067 | 0.001036 | 0.010816 |
| PTPRU    | 845.8368 | -0.70481 | 0.215193 | -3.27526 | 0.001056 | 0.010967 |
| LAYN     | 1337.145 | -0.40589 | 0.123965 | -3.27422 | 0.00106  | 0.010997 |
| TCTN2    | 641.408  | -0.42303 | 0.12929  | -3.27195 | 0.001068 | 0.011036 |
| CKAP4    | 7595.878 | -0.34081 | 0.104253 | -3.26903 | 0.001079 | 0.011128 |
| TMED1    | 342.1117 | -0.81231 | 0.2487   | -3.26622 | 0.00109  | 0.011201 |
| HS6ST1   | 784.2372 | -0.63246 | 0.193647 | -3.26605 | 0.001091 | 0.011201 |
| HEXIM2   | 42.80856 | -1.14991 | 0.352143 | -3.26545 | 0.001093 | 0.011215 |
| VPS28    | 389.9522 | -0.66389 | 0.203365 | -3.26454 | 0.001096 | 0.011239 |
| RELA     | 961.429  | -0.61977 | 0.189936 | -3.26307 | 0.001102 | 0.011275 |
| IZUMO4   | 27.89193 | -1.27575 | 0.391205 | -3.26107 | 0.00111  | 0.011332 |
| COL16A1  | 954.9312 | -0.66926 | 0.205393 | -3.25842 | 0.00112  | 0.011408 |
| CD109    | 4068.591 | -0.58251 | 0.178771 | -3.25842 | 0.00112  | 0.011408 |
| abl1     | 1635.388 | -0.50497 | 0.154995 | -3.25797 | 0.001122 | 0.011411 |
| P3H2     | 4150.42  | -0.3481  | 0.106896 | -3.25648 | 0.001128 | 0.011454 |
| C11orf45 | 67.94832 | -0.91521 | 0.281096 | -3.25587 | 0.00113  | 0.011466 |
| SRRM2    | 7842.235 | -0.43411 | 0.133352 | -3.25538 | 0.001132 | 0.01147  |
| FTSJ1    | 677.1353 | -0.49711 | 0.152907 | -3.25104 | 0.00115  | 0.011602 |
| SLC2A10  | 2370.087 | -0.47652 | 0.146568 | -3.25117 | 0.001149 | 0.011602 |
| SLC27A3  | 94.70918 | -0.9417  | 0.289699 | -3.2506  | 0.001152 | 0.011604 |
| MXRA5    | 79.55937 | -0.90009 | 0.277047 | -3.24887 | 0.001159 | 0.011652 |
| PDIA3    | 10387    | -0.39592 | 0.121856 | -3.24904 | 0.001158 | 0.011652 |
| FAM160B2 | 615.7617 | -0.74838 | 0.230553 | -3.246   | 0.00117  | 0.011709 |
| JMJD6    | 1105.187 | -0.43889 | 0.135219 | -3.24576 | 0.001171 | 0.011711 |
| TM9SF4   | 3012.421 | -0.4102  | 0.126396 | -3.24539 | 0.001173 | 0.011712 |
| LRRK1    | 1120.492 | -0.39672 | 0.122255 | -3.24503 | 0.001174 | 0.011719 |
| UBXN6    | 738.3778 | -0.70218 | 0.216412 | -3.24466 | 0.001176 | 0.011726 |
| TTC7A    | 723.9799 | -0.57437 | 0.177137 | -3.24254 | 0.001185 | 0.011768 |
| IGF1R    | 1558.656 | -0.45259 | 0.139609 | -3.24184 | 0.001188 | 0.011782 |
| VEGFB    | 1068.348 | -0.48665 | 0.150126 | -3.24165 | 0.001188 | 0.011783 |
| DFNA5    | 1511.578 | -0.37289 | 0.115095 | -3.23983 | 0.001196 | 0.01185  |
| KDM5B    | 3876.126 | -0.38588 | 0.119127 | -3.23922 | 0.001199 | 0.011868 |
| WASF2    | 1682.77  | -0.36555 | 0.112922 | -3.23716 | 0.001207 | 0.011931 |
| CYB5D2   | 282.8802 | -0.54233 | 0.167656 | -3.23476 | 0.001217 | 0.012001 |
| SLC17A5  | 657.6137 | -0.72622 | 0.224523 | -3.23452 | 0.001218 | 0.012003 |
| SMAD3    | 9798.041 | -0.47133 | 0.145753 | -3.23379 | 0.001222 | 0.012019 |
| TUBGCP2  | 818.1378 | -0.54954 | 0.16998  | -3.23295 | 0.001225 | 0.012046 |
| nomo3    | 8059.863 | -0.35251 | 0.109052 | -3.23249 | 0.001227 | 0.012057 |
| PCAT6    | 20.27385 | -1.57569 | 0.48794  | -3.22926 | 0.001241 | 0.012172 |
| SETBP1   | 316.4289 | -0.4813  | 0.149143 | -3.22712 | 0.00125  | 0.01224  |
| LENG9    | 28.65784 | -1.31916 | 0.408853 | -3.2265  | 0.001253 | 0.012251 |
| ZNF275   | 814.008  | -0.4004  | 0.124175 | -3.22452 | 0.001262 | 0.012319 |
| RGMB-AS1 | 83.9454  | -0.87002 | 0.270021 | -3.22205 | 0.001273 | 0.012404 |
| TIMP1    | 1339.005 | -0.78106 | 0.2426   | -3.21954 | 0.001284 | 0.012497 |
| CDK5RAP3 | 2166.574 | -0.53237 | 0.165377 | -3.21912 | 0.001286 | 0.0125   |



|          |          |          |          |          |          |          |
|----------|----------|----------|----------|----------|----------|----------|
| MMP25    | 41.23475 | -1.06996 | 0.332526 | -3.21766 | 0.001292 | 0.012524 |
| HPCAL1   | 1557.285 | -0.62595 | 0.194505 | -3.21815 | 0.00129  | 0.012524 |
| TSSK3    | 196.689  | -0.58852 | 0.182899 | -3.21774 | 0.001292 | 0.012524 |
| MT1IP    | 23.85432 | -1.57459 | 0.489568 | -3.21629 | 0.001299 | 0.012546 |
| RASSF7   | 250.0636 | -1.05228 | 0.327212 | -3.21591 | 0.0013   | 0.012546 |
| IGSF9B   | 95.77858 | -0.74894 | 0.233172 | -3.21198 | 0.001318 | 0.012687 |
| FAM214B  | 430.0423 | -0.62881 | 0.195818 | -3.2112  | 0.001322 | 0.012713 |
| GALK2    | 1058.608 | -0.41697 | 0.129894 | -3.2101  | 0.001327 | 0.01273  |
| HSPA6    | 28.01365 | -1.23826 | 0.385775 | -3.20979 | 0.001328 | 0.012736 |
| LOC10013 | 75.38867 | -0.91908 | 0.286659 | -3.20617 | 0.001345 | 0.012873 |
| ROBO3    | 391.2062 | -0.51265 | 0.159917 | -3.20571 | 0.001347 | 0.012878 |
| DYRK1B   | 111.1877 | -0.78633 | 0.245458 | -3.20352 | 0.001358 | 0.012937 |
| ECE1     | 1745.135 | -0.57879 | 0.180668 | -3.20359 | 0.001357 | 0.012937 |
| GLUL     | 5340.054 | -0.53551 | 0.167383 | -3.19932 | 0.001378 | 0.01307  |
| MYL6     | 7613.784 | -0.39582 | 0.123729 | -3.19908 | 0.001379 | 0.013073 |
| EEF1A2   | 353.8599 | -0.78054 | 0.244006 | -3.19883 | 0.00138  | 0.013076 |
| WHRN     | 99.74984 | -0.84777 | 0.265801 | -3.1895  | 0.001425 | 0.0134   |
| PLD3     | 1200.833 | -0.85102 | 0.266867 | -3.18892 | 0.001428 | 0.013418 |
| ADAMTS1  | 27.73389 | -1.21977 | 0.382543 | -3.18857 | 0.00143  | 0.013425 |
| MEIS3    | 320.7537 | -0.76706 | 0.240639 | -3.18758 | 0.001435 | 0.01345  |
| H6PD     | 1786.278 | -0.54637 | 0.171419 | -3.18732 | 0.001436 | 0.013451 |
| KLC4     | 417.6157 | -0.71447 | 0.224256 | -3.18594 | 0.001443 | 0.013499 |
| PNPLA2   | 551.5787 | -0.75535 | 0.237133 | -3.18535 | 0.001446 | 0.013518 |
| psg4     | 1954.021 | -0.61118 | 0.191982 | -3.18352 | 0.001455 | 0.013579 |
| MTMR9LP  | 57.45759 | -0.86063 | 0.270362 | -3.18325 | 0.001456 | 0.013584 |
| NPR2     | 738.8378 | -0.44401 | 0.139517 | -3.18244 | 0.00146  | 0.013601 |
| DYNLT3   | 1321.926 | -0.42345 | 0.133087 | -3.18176 | 0.001464 | 0.01362  |
| ZNF404   | 161.5091 | -0.61882 | 0.194589 | -3.18012 | 0.001472 | 0.013682 |
| ZNF470   | 430.4853 | -0.53221 | 0.167489 | -3.1776  | 0.001485 | 0.013768 |
| GNAI2    | 3450.37  | -0.52435 | 0.16512  | -3.17557 | 0.001495 | 0.013857 |
| TRPT1    | 298.4773 | -0.6998  | 0.220506 | -3.17362 | 0.001506 | 0.013908 |
| CPED1    | 1116.562 | -0.47653 | 0.150162 | -3.17345 | 0.001506 | 0.013908 |
| MAPK8IP3 | 578.4679 | -0.72938 | 0.229972 | -3.17159 | 0.001516 | 0.013989 |
| ALDH6A1  | 473.8889 | -0.45671 | 0.14402  | -3.17114 | 0.001518 | 0.013994 |
| ITM2C    | 3151.075 | -0.65217 | 0.205703 | -3.17046 | 0.001522 | 0.01401  |
| INCA1    | 172.9666 | -0.68082 | 0.215031 | -3.16614 | 0.001545 | 0.01416  |
| SPEG     | 268.8239 | -0.70813 | 0.223683 | -3.16579 | 0.001547 | 0.014169 |
| CD81     | 2899.561 | -0.69542 | 0.219714 | -3.16513 | 0.00155  | 0.014179 |
| hla-a    | 17286.04 | -0.63172 | 0.199736 | -3.16278 | 0.001563 | 0.014249 |
| PINK1    | 1596.583 | -0.5117  | 0.161786 | -3.16282 | 0.001563 | 0.014249 |
| DGKD     | 5766.869 | -0.43615 | 0.137889 | -3.16302 | 0.001561 | 0.014249 |
| CTIF     | 523.7567 | -0.58201 | 0.184091 | -3.16151 | 0.00157  | 0.014284 |
| LMAN1    | 12274.86 | -0.50699 | 0.160414 | -3.16051 | 0.001575 | 0.01431  |
| DTNA     | 40.32796 | -1.0266  | 0.324901 | -3.15973 | 0.001579 | 0.01434  |
| COPG1    | 6800.256 | -0.48028 | 0.152062 | -3.15842 | 0.001586 | 0.014387 |
| NTF3     | 22.84963 | -1.54773 | 0.490558 | -3.15505 | 0.001605 | 0.01451  |
| SDCBP2   | 36.84407 | -1.09576 | 0.347318 | -3.15491 | 0.001605 | 0.01451  |

|           |          |          |          |          |          |          |
|-----------|----------|----------|----------|----------|----------|----------|
| SLC35A2   | 505.3996 | -0.60826 | 0.192778 | -3.15522 | 0.001604 | 0.01451  |
| C8orf44   | 235.5781 | -0.54945 | 0.174354 | -3.15136 | 0.001625 | 0.014645 |
| SCYL1     | 1457.132 | -0.60823 | 0.193055 | -3.15055 | 0.00163  | 0.014677 |
| MTHFR     | 362.0643 | -0.53775 | 0.170876 | -3.14702 | 0.001649 | 0.014847 |
| P4HTM     | 305.9639 | -0.75728 | 0.240733 | -3.14572 | 0.001657 | 0.014904 |
| C9orf163  | 13.20067 | -1.95007 | 0.6204   | -3.14324 | 0.001671 | 0.014996 |
| SUSD1     | 244.644  | -0.51723 | 0.164565 | -3.14299 | 0.001672 | 0.014997 |
| PEX6      | 1185.154 | -0.58045 | 0.184725 | -3.14226 | 0.001676 | 0.015016 |
| MROH1     | 369.6588 | -0.75552 | 0.240496 | -3.14151 | 0.001681 | 0.015041 |
| FXYD5     | 1196.667 | -0.54915 | 0.174857 | -3.14054 | 0.001686 | 0.015082 |
| PIWIL2    | 27.56696 | -1.4725  | 0.469194 | -3.13836 | 0.001699 | 0.015177 |
| GPR37     | 173.4163 | -0.58489 | 0.186397 | -3.13789 | 0.001702 | 0.015193 |
| WDR13     | 383.8782 | -0.80721 | 0.257433 | -3.1356  | 0.001715 | 0.015284 |
| PXN       | 1657.245 | -0.46148 | 0.147194 | -3.1352  | 0.001717 | 0.015284 |
| TLE3      | 251.3001 | -0.54684 | 0.174561 | -3.13268 | 0.001732 | 0.015385 |
| GOLGA2    | 2691.995 | -0.53073 | 0.169451 | -3.13204 | 0.001736 | 0.015396 |
| NCSTN     | 1498.073 | -0.39057 | 0.124704 | -3.13196 | 0.001736 | 0.015396 |
| PMM1      | 462.0679 | -0.69787 | 0.222954 | -3.13012 | 0.001747 | 0.015476 |
| SLC35E2   | 412.3671 | -0.54445 | 0.17397  | -3.12959 | 0.00175  | 0.015477 |
| tmem187   | 124.4943 | -0.75582 | 0.241542 | -3.12914 | 0.001753 | 0.015492 |
| FLNA      | 30380.83 | -0.75829 | 0.242379 | -3.12853 | 0.001757 | 0.015506 |
| SALL1     | 1295.191 | -0.38367 | 0.122674 | -3.12759 | 0.001762 | 0.015547 |
| ADAMTSL4  | 214.1298 | -0.65773 | 0.21039  | -3.12625 | 0.001771 | 0.015591 |
| FOXD1     | 413.2065 | -0.49233 | 0.157784 | -3.12029 | 0.001807 | 0.015892 |
| BCL9L     | 836.1412 | -0.72406 | 0.232146 | -3.11899 | 0.001815 | 0.015944 |
| OBSL1     | 1326.702 | -0.67957 | 0.21804  | -3.1167  | 0.001829 | 0.016032 |
| CDH13     | 2144.228 | -0.38716 | 0.124268 | -3.11549 | 0.001836 | 0.01608  |
| ZMYND10   | 34.55283 | -1.28885 | 0.414311 | -3.11082 | 0.001866 | 0.016281 |
| LOC143661 | 81.48832 | -0.80219 | 0.258338 | -3.10519 | 0.001902 | 0.016556 |
| FADS3     | 566.9215 | -0.70074 | 0.225867 | -3.10246 | 0.001919 | 0.016691 |
| TNFSF12   | 64.66118 | -0.88941 | 0.286731 | -3.10189 | 0.001923 | 0.016714 |
| OSMR      | 6254.545 | -0.36419 | 0.11743  | -3.10134 | 0.001926 | 0.016726 |
| B3GNT9    | 406.1032 | -0.67037 | 0.216169 | -3.10115 | 0.001928 | 0.016727 |
| SEC61G    | 3018.057 | -0.39966 | 0.129005 | -3.09804 | 0.001948 | 0.016856 |
| TMEM43    | 2456.981 | -0.39776 | 0.128473 | -3.09607 | 0.001961 | 0.016921 |
| DNAJC4    | 311.6104 | -0.83421 | 0.269472 | -3.09573 | 0.001963 | 0.016926 |
| PBXIP1    | 1665.307 | -0.54695 | 0.176714 | -3.09509 | 0.001968 | 0.016926 |
| LOC388691 | 399.3088 | -0.51855 | 0.167954 | -3.08746 | 0.002019 | 0.017284 |
| ABLIM3    | 1740.664 | -0.34496 | 0.111742 | -3.08707 | 0.002021 | 0.017298 |
| MNT       | 271.5105 | -0.54956 | 0.178058 | -3.08639 | 0.002026 | 0.017318 |
| PRX       | 135.1887 | -0.67158 | 0.217647 | -3.08564 | 0.002031 | 0.017342 |
| CCDC80    | 5107.89  | -0.35533 | 0.115182 | -3.08492 | 0.002036 | 0.017374 |
| DDT       | 139.5444 | -0.92834 | 0.300988 | -3.08432 | 0.00204  | 0.0174   |
| ARRDC1    | 121.6073 | -0.76808 | 0.249065 | -3.08384 | 0.002043 | 0.017409 |
| DENND6B   | 41.29169 | -1.04759 | 0.339929 | -3.08178 | 0.002058 | 0.017491 |
| SCRN2     | 613.2869 | -0.78702 | 0.255394 | -3.0816  | 0.002059 | 0.017492 |
| HDAC9     | 1221.198 | -0.41718 | 0.135425 | -3.08052 | 0.002066 | 0.017537 |

|           |          |          |          |          |          |          |
|-----------|----------|----------|----------|----------|----------|----------|
| PRMT2     | 1316.898 | -0.53604 | 0.174033 | -3.08009 | 0.002069 | 0.017552 |
| MKNK2     | 975.0849 | -0.60365 | 0.196025 | -3.07946 | 0.002074 | 0.017579 |
| CACNA1C   | 823.4402 | -0.3764  | 0.122298 | -3.07773 | 0.002086 | 0.017659 |
| AGAP2-AS  | 31.70206 | -1.36422 | 0.443524 | -3.07586 | 0.002099 | 0.017725 |
| KLHL31    | 28.98965 | -1.18484 | 0.385326 | -3.0749  | 0.002106 | 0.017773 |
| MBOAT7    | 756.4849 | -0.51916 | 0.16894  | -3.07301 | 0.002119 | 0.017866 |
| AGER      | 95.43005 | -0.70754 | 0.230332 | -3.07182 | 0.002128 | 0.017908 |
| MST1      | 144.509  | -0.78865 | 0.256798 | -3.07108 | 0.002133 | 0.017923 |
| PPL       | 87.66273 | -0.76169 | 0.248387 | -3.06655 | 0.002165 | 0.018177 |
| WBSCR27   | 44.3586  | -1.0874  | 0.354809 | -3.06475 | 0.002179 | 0.018266 |
| PNPLA6    | 585.6902 | -0.67792 | 0.221234 | -3.06425 | 0.002182 | 0.018266 |
| TMEM219   | 1012.812 | -0.55784 | 0.182055 | -3.06415 | 0.002183 | 0.018266 |
| MVP       | 3220.302 | -0.73524 | 0.240014 | -3.06333 | 0.002189 | 0.018304 |
| ELL       | 190.8998 | -0.67822 | 0.221481 | -3.06221 | 0.002197 | 0.018353 |
| CHRNA3    | 39.95327 | -1.06393 | 0.347599 | -3.06079 | 0.002208 | 0.01843  |
| ATP6AP1L  | 72.3484  | -0.9327  | 0.304939 | -3.05864 | 0.002223 | 0.018528 |
| TRHDE-AS  | 501.4115 | -0.613   | 0.200508 | -3.05726 | 0.002234 | 0.018579 |
| SEMA4G    | 71.65034 | -0.82239 | 0.269068 | -3.05643 | 0.00224  | 0.01861  |
| PIGT      | 2642.304 | -0.56853 | 0.186048 | -3.05581 | 0.002245 | 0.018639 |
| LINC01001 | 52.96731 | -1.00899 | 0.330292 | -3.05485 | 0.002252 | 0.018658 |
| ORAI3     | 690.3211 | -0.59442 | 0.194581 | -3.05487 | 0.002252 | 0.018658 |
| GPR176    | 712.0785 | -0.3886  | 0.127276 | -3.05321 | 0.002264 | 0.01872  |
| BACE2     | 1765.17  | -0.36013 | 0.118184 | -3.04718 | 0.00231  | 0.019006 |
| CBX8      | 219.1868 | -0.62638 | 0.205776 | -3.04399 | 0.002335 | 0.019191 |
| SNX8      | 271.225  | -0.68081 | 0.223713 | -3.04322 | 0.002341 | 0.019219 |
| CYB561    | 1182.729 | -0.42752 | 0.140511 | -3.04257 | 0.002346 | 0.019251 |
| UBC       | 35304.12 | -0.3694  | 0.12154  | -3.0393  | 0.002371 | 0.019409 |
| IGSF8     | 376.2498 | -0.82721 | 0.27234  | -3.03743 | 0.002386 | 0.01952  |
| MYO1F     | 49.2109  | -0.93847 | 0.309104 | -3.03609 | 0.002397 | 0.019586 |
| FAM157A   | 41.65305 | -0.96827 | 0.31916  | -3.03379 | 0.002415 | 0.019694 |
| FOXO3     | 1926.297 | -0.34333 | 0.113193 | -3.0331  | 0.002421 | 0.019729 |
| TPD52     | 1014.776 | -0.51031 | 0.168282 | -3.03245 | 0.002426 | 0.01974  |
| LAMB4     | 351.1157 | -0.45091 | 0.148721 | -3.03193 | 0.00243  | 0.019764 |
| CABIN1    | 2012.371 | -0.46293 | 0.152733 | -3.03096 | 0.002438 | 0.019807 |
| PLEKHM1F  | 317.0896 | -0.5003  | 0.165282 | -3.02693 | 0.002471 | 0.020041 |
| LBH       | 263.7349 | -0.58636 | 0.193729 | -3.0267  | 0.002472 | 0.020045 |
| PDIA5     | 403.5658 | -0.53757 | 0.177731 | -3.02466 | 0.002489 | 0.020149 |
| PDE4DIP   | 3632.373 | -0.37562 | 0.124189 | -3.02459 | 0.00249  | 0.020149 |
| 43533     | 227.1682 | -0.54262 | 0.179624 | -3.02088 | 0.00252  | 0.020339 |
| ATP8B3    | 226.8245 | -0.56243 | 0.186314 | -3.01871 | 0.002539 | 0.020453 |
| LINC00486 | 197.7972 | -0.78053 | 0.258596 | -3.01835 | 0.002542 | 0.020466 |
| ICOSLG    | 395.8318 | -0.5935  | 0.196802 | -3.01571 | 0.002564 | 0.020607 |
| HYI       | 31.17575 | -1.28417 | 0.425949 | -3.01484 | 0.002571 | 0.020619 |
| GBF1      | 2820.497 | -0.36293 | 0.120475 | -3.01249 | 0.002591 | 0.020725 |
| FKBP11    | 300.6429 | -0.44572 | 0.147987 | -3.01189 | 0.002596 | 0.020755 |
| SEC31B    | 334.7875 | -0.48723 | 0.161828 | -3.01082 | 0.002605 | 0.020807 |
| PLP2      | 1956.374 | -0.35039 | 0.116422 | -3.00962 | 0.002616 | 0.020868 |

|          |          |          |          |          |          |          |
|----------|----------|----------|----------|----------|----------|----------|
| PLEKHG5  | 617.3    | -0.64846 | 0.215821 | -3.00463 | 0.002659 | 0.021169 |
| AGA      | 399.0627 | -0.42609 | 0.141833 | -3.00415 | 0.002663 | 0.021192 |
| ANKS3    | 231.5355 | -0.62614 | 0.208631 | -3.00118 | 0.002689 | 0.021345 |
| SNAPC3   | 1487.146 | -0.42804 | 0.142726 | -2.99903 | 0.002708 | 0.021474 |
| P2RX4    | 175.5436 | -0.65371 | 0.218099 | -2.99729 | 0.002724 | 0.021563 |
| FAM193B  | 616.4769 | -0.54922 | 0.18351  | -2.99287 | 0.002764 | 0.021789 |
| c10orf54 | 45.43669 | -0.92483 | 0.309375 | -2.98933 | 0.002796 | 0.022009 |
| chpf2    | 2135.776 | -0.60666 | 0.202927 | -2.98953 | 0.002794 | 0.022009 |
| INO80B   | 174.1049 | -0.60658 | 0.203001 | -2.98804 | 0.002808 | 0.022069 |
| CHST8    | 16.55478 | -1.75888 | 0.588713 | -2.98767 | 0.002811 | 0.022084 |
| GPC6     | 39.8363  | -1.03238 | 0.345693 | -2.9864  | 0.002823 | 0.022142 |
| IQGAP3   | 2073.573 | -0.37397 | 0.125258 | -2.98557 | 0.00283  | 0.02217  |
| AMPD2    | 2201.45  | -0.64292 | 0.215415 | -2.98456 | 0.00284  | 0.022186 |
| CHID1    | 1297.995 | -0.64113 | 0.214815 | -2.98458 | 0.00284  | 0.022186 |
| HDLBP    | 27011.27 | -0.40591 | 0.136091 | -2.9826  | 0.002858 | 0.022306 |
| DUSP5P1  | 38.945   | -1.01158 | 0.339705 | -2.97781 | 0.002903 | 0.0226   |
| TNS3     | 14799.71 | -0.40098 | 0.134666 | -2.97762 | 0.002905 | 0.022603 |
| RNF181   | 1024.67  | -0.4953  | 0.166351 | -2.97745 | 0.002907 | 0.022604 |
| PRRC1    | 4598.725 | -0.4563  | 0.153322 | -2.97611 | 0.002919 | 0.022657 |
| 43709    | 76.52148 | -0.78449 | 0.263631 | -2.97572 | 0.002923 | 0.022675 |
| MAMSTR   | 36.93991 | -1.01724 | 0.341959 | -2.97475 | 0.002932 | 0.022724 |
| AKR7A2   | 812.3334 | -0.44942 | 0.151096 | -2.97438 | 0.002936 | 0.02274  |
| DOCK6    | 250.7541 | -0.52748 | 0.177365 | -2.974   | 0.002939 | 0.022757 |
| TCEB3C   | 22.86634 | -1.35061 | 0.454672 | -2.97051 | 0.002973 | 0.022994 |
| ERGIC3   | 5977.589 | -0.49373 | 0.166324 | -2.9685  | 0.002993 | 0.023086 |
| DHCR7    | 2245.808 | -0.57458 | 0.193629 | -2.96743 | 0.003003 | 0.023144 |
| KCNMA1   | 2013.842 | -0.45303 | 0.152689 | -2.96699 | 0.003007 | 0.023154 |
| TRAM2    | 6481.027 | -0.35062 | 0.118172 | -2.96706 | 0.003007 | 0.023154 |
| FLJ31356 | 68.06816 | -0.78856 | 0.265842 | -2.96626 | 0.003014 | 0.023198 |
| SH3GL1   | 759.0512 | -0.81688 | 0.27595  | -2.96025 | 0.003074 | 0.023607 |
| GALK1    | 179.5351 | -0.89671 | 0.30298  | -2.95964 | 0.00308  | 0.023631 |
| GOS2     | 262.417  | -0.46941 | 0.158653 | -2.9587  | 0.003089 | 0.023679 |
| LRRC46   | 54.62866 | -0.90175 | 0.304819 | -2.95831 | 0.003093 | 0.023686 |
| c11orf68 | 857.3913 | -0.66872 | 0.226164 | -2.95682 | 0.003108 | 0.023754 |
| LMF2     | 607.253  | -0.79674 | 0.269515 | -2.9562  | 0.003115 | 0.02379  |
| COPA     | 12592.47 | -0.36277 | 0.122763 | -2.95509 | 0.003126 | 0.023864 |
| TMEM130  | 146.3221 | -0.60018 | 0.203257 | -2.95281 | 0.003149 | 0.024005 |
| ZSWIM8   | 707.6249 | -0.60149 | 0.203926 | -2.94955 | 0.003182 | 0.024212 |
| SUN2     | 2119.521 | -0.6462  | 0.219205 | -2.9479  | 0.003199 | 0.024329 |
| LOC10014 | 31.36728 | -1.05636 | 0.35869  | -2.94506 | 0.003229 | 0.024518 |
| PRKAR2A  | 74.48826 | -0.74507 | 0.253266 | -2.94183 | 0.003263 | 0.024737 |
| PHYKPL   | 739.5877 | -0.4867  | 0.165481 | -2.94114 | 0.00327  | 0.02477  |
| LGALS3BP | 5811.775 | -0.6629  | 0.225467 | -2.94013 | 0.003281 | 0.024838 |
| 43717    | 4089.815 | -0.5317  | 0.180909 | -2.93906 | 0.003292 | 0.024911 |
| LOC10050 | 107.2818 | -0.61919 | 0.210702 | -2.9387  | 0.003296 | 0.024928 |
| CNPY3    | 718.9424 | -0.53333 | 0.181523 | -2.9381  | 0.003302 | 0.024953 |
| MED15    | 605.1993 | -0.60068 | 0.204466 | -2.93778 | 0.003306 | 0.024966 |

|          |          |          |          |          |          |          |
|----------|----------|----------|----------|----------|----------|----------|
| nomo1    | 8001.715 | -0.32025 | 0.109083 | -2.93583 | 0.003327 | 0.025099 |
| MAP3K7CI | 32.7552  | -1.03993 | 0.354255 | -2.93553 | 0.00333  | 0.025111 |
| NFE2L1   | 3318.507 | -0.43797 | 0.149265 | -2.93415 | 0.003345 | 0.025186 |
| BET1     | 2637.943 | -0.43161 | 0.147139 | -2.93334 | 0.003353 | 0.02524  |
| ZNF385A  | 32.61339 | -1.13911 | 0.388526 | -2.93187 | 0.003369 | 0.02531  |
| RAB43    | 813.1103 | -0.6576  | 0.224345 | -2.9312  | 0.003377 | 0.025346 |
| TPM1     | 11303.26 | -0.44103 | 0.150482 | -2.93075 | 0.003381 | 0.025364 |
| DNM2     | 2556.932 | -0.52103 | 0.177808 | -2.93027 | 0.003387 | 0.025391 |
| BEND5    | 11.58377 | -2.34521 | 0.800491 | -2.92972 | 0.003393 | 0.025414 |
| PLIN3    | 1595.051 | -0.42872 | 0.146337 | -2.92968 | 0.003393 | 0.025414 |
| IRF7     | 100.7992 | -0.95753 | 0.326902 | -2.92912 | 0.003399 | 0.025448 |
| IFT140   | 589.5671 | -0.58842 | 0.200913 | -2.92873 | 0.003404 | 0.025455 |
| RUSC2    | 753.0965 | -0.58466 | 0.199658 | -2.92829 | 0.003408 | 0.025456 |
| LOC90246 | 44.65602 | -0.92175 | 0.31482  | -2.92786 | 0.003413 | 0.025477 |
| CGB7     | 18.28869 | -1.70308 | 0.581744 | -2.92754 | 0.003417 | 0.025492 |
| ARAP1    | 1171.732 | -0.59587 | 0.203611 | -2.92653 | 0.003428 | 0.025513 |
| PITPNM2  | 485.8411 | -0.59773 | 0.204504 | -2.92285 | 0.003468 | 0.025749 |
| PPARD    | 508.3622 | -0.61777 | 0.211398 | -2.92231 | 0.003475 | 0.025764 |
| TMEM184  | 1357.961 | -0.51917 | 0.177964 | -2.91728 | 0.003531 | 0.026106 |
| MUC1     | 32.66331 | -1.09744 | 0.376212 | -2.91707 | 0.003533 | 0.02611  |
| NKX2-1   | 30.87271 | -1.20022 | 0.411783 | -2.91468 | 0.003561 | 0.026261 |
| AMOTL2   | 2682.14  | -0.38572 | 0.132375 | -2.91383 | 0.00357  | 0.02632  |
| ARSA     | 233.2601 | -0.82907 | 0.284552 | -2.9136  | 0.003573 | 0.026327 |
| TFAP2A   | 967.7362 | -0.36353 | 0.124792 | -2.91305 | 0.003579 | 0.026348 |
| SPATA20  | 1093.054 | -0.67754 | 0.23263  | -2.9125  | 0.003585 | 0.026382 |
| NLGN2    | 484.6472 | -0.5046  | 0.173291 | -2.91187 | 0.003593 | 0.02641  |
| cemip    | 274.8503 | -0.50432 | 0.173214 | -2.91153 | 0.003597 | 0.026421 |
| ZNF133   | 618.4399 | -0.37873 | 0.130084 | -2.91144 | 0.003598 | 0.026421 |
| XYLT2    | 839.6552 | -0.63724 | 0.218967 | -2.91021 | 0.003612 | 0.0265   |
| RNASET2  | 210.6823 | -0.5684  | 0.195348 | -2.90969 | 0.003618 | 0.026532 |
| HEXIM1   | 510.3137 | -0.38535 | 0.132482 | -2.90872 | 0.003629 | 0.026589 |
| ACTA2    | 136.0152 | -0.66849 | 0.230024 | -2.90619 | 0.003659 | 0.026729 |
| YIF1A    | 1028.731 | -0.79223 | 0.272714 | -2.90498 | 0.003673 | 0.026801 |
| TMEM39A  | 1841.459 | -0.44295 | 0.152501 | -2.9046  | 0.003677 | 0.026801 |
| TPD52L2  | 2857.539 | -0.36552 | 0.125835 | -2.90475 | 0.003675 | 0.026801 |
| A1BG     | 90.06338 | -0.837   | 0.288287 | -2.90335 | 0.003692 | 0.026883 |
| LENG8    | 1302.978 | -0.62924 | 0.216769 | -2.90283 | 0.003698 | 0.026916 |
| RRAGA    | 1246.165 | -0.3455  | 0.119047 | -2.90219 | 0.003706 | 0.026957 |
| STX16    | 2423.28  | -0.41064 | 0.141531 | -2.90144 | 0.003714 | 0.027009 |
| PAGR1    | 677.5312 | -0.367   | 0.126527 | -2.9006  | 0.003725 | 0.027069 |
| DAPK3    | 309.4426 | -0.78798 | 0.271784 | -2.89928 | 0.00374  | 0.027107 |
| CRAT     | 673.8422 | -0.56538 | 0.195051 | -2.89861 | 0.003748 | 0.027139 |
| FASTK    | 637.9064 | -0.76548 | 0.264341 | -2.89582 | 0.003782 | 0.027331 |
| FLOT1    | 5832.12  | -0.4834  | 0.166988 | -2.89482 | 0.003794 | 0.027398 |
| AQP3     | 32.51511 | -1.02362 | 0.353748 | -2.89365 | 0.003808 | 0.027468 |
| ZIC4     | 96.16453 | -0.6496  | 0.224596 | -2.89228 | 0.003825 | 0.027547 |
| CD99     | 4936.777 | -0.43355 | 0.149884 | -2.89259 | 0.003821 | 0.027547 |

|           |          |          |          |          |          |          |
|-----------|----------|----------|----------|----------|----------|----------|
| ELF4      | 1396.937 | -0.34044 | 0.117739 | -2.89146 | 0.003835 | 0.027571 |
| TRAPPC1   | 713.285  | -0.45632 | 0.157874 | -2.89039 | 0.003848 | 0.027652 |
| SEMA5A    | 1396.562 | -0.35207 | 0.121863 | -2.88906 | 0.003864 | 0.027756 |
| HPS3      | 4124.292 | -0.38844 | 0.134487 | -2.88831 | 0.003873 | 0.02781  |
| YIF1B     | 452.5175 | -0.6878  | 0.23815  | -2.8881  | 0.003876 | 0.027815 |
| P3H4      | 830.7247 | -0.69506 | 0.240773 | -2.88681 | 0.003892 | 0.027903 |
| LMF1      | 141.7461 | -0.82128 | 0.284706 | -2.88465 | 0.003919 | 0.028005 |
| MMP19     | 147.4769 | -0.58697 | 0.203684 | -2.88177 | 0.003954 | 0.028201 |
| TAPBP     | 4582.306 | -0.51318 | 0.1781   | -2.88144 | 0.003959 | 0.028201 |
| KDM2A     | 2572.309 | -0.31647 | 0.10983  | -2.88143 | 0.003959 | 0.028201 |
| RPL10     | 8824.844 | -0.46598 | 0.161785 | -2.88024 | 0.003974 | 0.028294 |
| TNC       | 1468.719 | -0.63826 | 0.221638 | -2.87974 | 0.00398  | 0.028314 |
| ZNF358    | 277.5571 | -0.7763  | 0.269697 | -2.87842 | 0.003997 | 0.028363 |
| RGS9      | 116.2938 | -0.70991 | 0.246702 | -2.8776  | 0.004007 | 0.028363 |
| ITGA1     | 560.4915 | -0.3932  | 0.13671  | -2.87615 | 0.004026 | 0.028467 |
| SLC41A1   | 1240.989 | -0.33796 | 0.11758  | -2.87425 | 0.00405  | 0.028625 |
| GLTP      | 586.7717 | -0.36421 | 0.126743 | -2.87365 | 0.004058 | 0.028654 |
| POLL      | 256.1228 | -0.64324 | 0.223927 | -2.87256 | 0.004072 | 0.028726 |
| C14orf1   | 524.3429 | -0.40038 | 0.139493 | -2.87022 | 0.004102 | 0.028901 |
| CECR5     | 717.329  | -0.59706 | 0.208048 | -2.8698  | 0.004107 | 0.028925 |
| TMEM214   | 2042.791 | -0.5847  | 0.203892 | -2.86767 | 0.004135 | 0.029067 |
| MC1R      | 134.4787 | -0.7487  | 0.261137 | -2.86709 | 0.004143 | 0.029095 |
| SND1      | 8576.739 | -0.33921 | 0.118323 | -2.86683 | 0.004146 | 0.029106 |
| LTBP2     | 95.9111  | -0.66894 | 0.233377 | -2.86635 | 0.004152 | 0.029136 |
| SEMA3A    | 1630.724 | -0.53184 | 0.185699 | -2.86401 | 0.004183 | 0.029313 |
| MVD       | 502.7836 | -0.82902 | 0.28955  | -2.86312 | 0.004195 | 0.029342 |
| LINC00663 | 71.12888 | -0.80046 | 0.279667 | -2.86219 | 0.004207 | 0.029401 |
| EMC9      | 87.62428 | -0.67614 | 0.236474 | -2.85926 | 0.004246 | 0.029598 |
| BAIAP2L1  | 682.4503 | -0.35464 | 0.124054 | -2.85873 | 0.004253 | 0.029617 |
| TMCO3     | 2902.764 | -0.29713 | 0.10419  | -2.85182 | 0.004347 | 0.030132 |
| PKN1      | 1197.809 | -0.66511 | 0.233396 | -2.84969 | 0.004376 | 0.030239 |
| dnmbp     | 1034.671 | -0.35296 | 0.124012 | -2.84621 | 0.004424 | 0.030507 |
| ANKRD37   | 34.76745 | -1.18486 | 0.41651  | -2.84473 | 0.004445 | 0.030577 |
| ADGRG1    | 105.0122 | -0.69489 | 0.244251 | -2.84497 | 0.004442 | 0.030577 |
| PRICKLE2  | 1248.804 | -0.32895 | 0.115632 | -2.84481 | 0.004444 | 0.030577 |
| LINC00847 | 216.7869 | -0.61162 | 0.215125 | -2.84309 | 0.004468 | 0.030694 |
| SLC26A1   | 17.46633 | -1.48047 | 0.520799 | -2.84268 | 0.004474 | 0.03072  |
| SLC39A7   | 5146.295 | -0.49417 | 0.173862 | -2.84231 | 0.004479 | 0.030742 |
| TMEM189   | 941.2224 | -0.40415 | 0.142244 | -2.84121 | 0.004494 | 0.030807 |
| RSPH3     | 265.0336 | -0.53586 | 0.188746 | -2.83909 | 0.004524 | 0.030973 |
| LINC00115 | 50.87556 | -0.8923  | 0.31448  | -2.83738 | 0.004549 | 0.03111  |
| ZNF710    | 416.6317 | -0.46821 | 0.165007 | -2.83752 | 0.004547 | 0.03111  |
| Psg9      | 50.82628 | -0.91045 | 0.3209   | -2.83718 | 0.004551 | 0.031116 |
| LIMD1     | 644.8005 | -0.39819 | 0.140364 | -2.83688 | 0.004556 | 0.031131 |
| FLJ23867  | 101.708  | -0.73206 | 0.258578 | -2.8311  | 0.004639 | 0.031574 |
| ZNF471    | 440.8266 | -0.4188  | 0.147929 | -2.8311  | 0.004639 | 0.031574 |
| IQCG      | 385.1948 | -0.44562 | 0.157458 | -2.83007 | 0.004654 | 0.031648 |

|           |          |          |          |          |          |          |
|-----------|----------|----------|----------|----------|----------|----------|
| HCG27     | 71.36792 | -0.72937 | 0.257941 | -2.82767 | 0.004689 | 0.031808 |
| ARHGDIA   | 797.9846 | -0.58122 | 0.205552 | -2.82761 | 0.00469  | 0.031808 |
| HLA-B     | 8298.653 | -0.54089 | 0.191269 | -2.82789 | 0.004686 | 0.031808 |
| LOC100121 | 269.3705 | -0.50293 | 0.177967 | -2.82596 | 0.004714 | 0.031916 |
| nbl1      | 282.1307 | -0.69303 | 0.245343 | -2.82472 | 0.004732 | 0.032026 |
| TMEM63B   | 691.4652 | -0.43488 | 0.153988 | -2.8241  | 0.004741 | 0.032074 |
| RNPEPL1   | 382.0182 | -0.79808 | 0.282722 | -2.82284 | 0.00476  | 0.032186 |
| RPL28     | 2747.358 | -0.60844 | 0.215584 | -2.82231 | 0.004768 | 0.032225 |
| HCN2      | 351.7106 | -0.68831 | 0.243968 | -2.82131 | 0.004783 | 0.032297 |
| CTSD      | 7980.383 | -1.22318 | 0.433598 | -2.821   | 0.004787 | 0.032315 |
| MFAP4     | 35.65035 | -1.05117 | 0.372764 | -2.81993 | 0.004803 | 0.032394 |
| B9D1      | 177.3928 | -0.69801 | 0.247556 | -2.81961 | 0.004808 | 0.032412 |
| CD69      | 17.77335 | -1.38205 | 0.490243 | -2.81912 | 0.004816 | 0.032448 |
| RARRES2   | 57.49642 | -0.78759 | 0.279597 | -2.81688 | 0.004849 | 0.032661 |
| TEX22     | 17.96161 | -1.67404 | 0.594343 | -2.81661 | 0.004853 | 0.032673 |
| GSAP      | 336.4832 | -0.48888 | 0.17358  | -2.81644 | 0.004856 | 0.032677 |
| SLC7A5P2  | 359.6811 | -0.42534 | 0.151191 | -2.81325 | 0.004904 | 0.032974 |
| bri3      | 1449.366 | -0.51951 | 0.184756 | -2.81189 | 0.004925 | 0.033099 |
| dlg4      | 622.3387 | -0.51654 | 0.183811 | -2.81016 | 0.004952 | 0.033234 |
| CCDC24    | 147.9468 | -0.68059 | 0.242488 | -2.80671 | 0.005005 | 0.033476 |
| ATP1A1-A5 | 118.9331 | -0.5662  | 0.201715 | -2.80694 | 0.005002 | 0.033476 |
| ZNF785    | 319.4485 | -0.48685 | 0.173507 | -2.80595 | 0.005017 | 0.033526 |
| RFTN1     | 1368.785 | -0.424   | 0.151104 | -2.80604 | 0.005015 | 0.033526 |
| NBEAL2    | 290.8341 | -0.60629 | 0.216089 | -2.80576 | 0.00502  | 0.033531 |
| CDK18     | 203.4464 | -0.65381 | 0.233113 | -2.80469 | 0.005037 | 0.0336   |
| IQSEC2    | 196.9423 | -0.53442 | 0.190692 | -2.80252 | 0.00507  | 0.033753 |
| BSCL2     | 944.8532 | -0.48335 | 0.172522 | -2.80168 | 0.005084 | 0.033826 |
| GNB2      | 1187.03  | -0.71617 | 0.255838 | -2.79932 | 0.005121 | 0.034031 |
| CAPNS1    | 3507.556 | -0.47177 | 0.168528 | -2.79933 | 0.005121 | 0.034031 |
| SLC34A3   | 16.71462 | -1.40822 | 0.503398 | -2.79743 | 0.005151 | 0.034216 |
| TNFRSF25  | 162.3588 | -0.64007 | 0.228878 | -2.79654 | 0.005165 | 0.034269 |
| GPR173    | 111.1734 | -0.60917 | 0.217888 | -2.79581 | 0.005177 | 0.034309 |
| ARHGAP1   | 1124.525 | -0.54808 | 0.196087 | -2.7951  | 0.005188 | 0.034346 |
| RABAC1    | 403.3369 | -0.78596 | 0.281314 | -2.79388 | 0.005208 | 0.034415 |
| FKBP2     | 702.2152 | -0.60601 | 0.216936 | -2.7935  | 0.005214 | 0.034441 |
| ZNF436-A5 | 416.6883 | -0.54509 | 0.195597 | -2.78681 | 0.005323 | 0.035012 |
| MAP4      | 7646.918 | -0.27649 | 0.099213 | -2.7868  | 0.005323 | 0.035012 |
| APC2      | 87.7159  | -0.86446 | 0.310333 | -2.78557 | 0.005343 | 0.035115 |
| PCBP3     | 226.5512 | -0.49019 | 0.176072 | -2.78401 | 0.005369 | 0.035239 |
| ISYNA1    | 104.0919 | -0.83247 | 0.299101 | -2.78324 | 0.005382 | 0.035293 |
| TBX6      | 38.75859 | -1.03396 | 0.371582 | -2.7826  | 0.005393 | 0.035333 |
| TUT1      | 548.834  | -0.49189 | 0.176791 | -2.78234 | 0.005397 | 0.035341 |
| ttc30a    | 754.5889 | -0.34974 | 0.125706 | -2.78225 | 0.005398 | 0.035341 |
| RAB40C    | 160.1546 | -0.61697 | 0.222034 | -2.77873 | 0.005457 | 0.035681 |
| CAPZB     | 2562.568 | -0.36677 | 0.132142 | -2.77562 | 0.00551  | 0.036009 |
| C12orf57  | 276.0339 | -0.8555  | 0.308265 | -2.77521 | 0.005517 | 0.036039 |
| RBMS2     | 1648.759 | -0.38244 | 0.137854 | -2.77423 | 0.005533 | 0.036132 |

|           |          |          |          |          |          |          |
|-----------|----------|----------|----------|----------|----------|----------|
| PIEZO2    | 413.4838 | -0.39984 | 0.144216 | -2.77252 | 0.005562 | 0.036276 |
| LOC10050  | 26.27324 | -1.2091  | 0.436253 | -2.77155 | 0.005579 | 0.036369 |
| DENND4B   | 646.5463 | -0.42754 | 0.154359 | -2.76978 | 0.005609 | 0.036537 |
| LRRFIP1   | 4520.424 | -0.38732 | 0.139873 | -2.76909 | 0.005621 | 0.036583 |
| ARHGEF18  | 735.7457 | -0.48737 | 0.176043 | -2.76844 | 0.005633 | 0.036595 |
| RECQL5    | 664.2169 | -0.41876 | 0.151256 | -2.76854 | 0.005631 | 0.036595 |
| LSS       | 1752.926 | -0.53453 | 0.193121 | -2.76784 | 0.005643 | 0.036647 |
| ttc21a    | 102.7515 | -0.61975 | 0.224005 | -2.76667 | 0.005663 | 0.036748 |
| PAX2      | 24.23417 | -1.11638 | 0.403536 | -2.7665  | 0.005666 | 0.036752 |
| NNAT      | 64.36713 | -0.82303 | 0.297757 | -2.76411 | 0.005708 | 0.036959 |
| MVB12A    | 235.9422 | -0.7207  | 0.26073  | -2.76415 | 0.005707 | 0.036959 |
| DPYSL4    | 344.385  | -0.62281 | 0.225454 | -2.76248 | 0.005736 | 0.037083 |
| C20orf203 | 24.40917 | -1.2781  | 0.462944 | -2.76082 | 0.005766 | 0.037229 |
| CD70      | 49.12286 | -0.82491 | 0.298973 | -2.75914 | 0.005795 | 0.037401 |
| C3        | 597.9884 | -0.55986 | 0.202974 | -2.75827 | 0.005811 | 0.037474 |
| GUSBP1    | 643.1519 | -0.38675 | 0.140224 | -2.7581  | 0.005814 | 0.037474 |
| GM2A      | 2262.051 | -0.35069 | 0.127163 | -2.75779 | 0.005819 | 0.037493 |
| PER2      | 580.8656 | -0.45686 | 0.165685 | -2.75742 | 0.005826 | 0.037519 |
| RAB20     | 400.5412 | -0.46523 | 0.168776 | -2.75649 | 0.005843 | 0.037611 |
| C11orf24  | 624.5925 | -0.48194 | 0.174872 | -2.75599 | 0.005852 | 0.037638 |
| ABCB6     | 2222.104 | -0.42049 | 0.152621 | -2.75513 | 0.005867 | 0.037721 |
| PLEC      | 8408.487 | -0.75365 | 0.273568 | -2.75489 | 0.005871 | 0.037722 |
| ARSD      | 425.3079 | -0.37004 | 0.134371 | -2.75384 | 0.00589  | 0.037805 |
| HOXD10    | 382.2465 | -0.39447 | 0.143469 | -2.74954 | 0.005968 | 0.038226 |
| MAFK      | 240.8491 | -0.79093 | 0.28774  | -2.74878 | 0.005982 | 0.038267 |
| STXBP1    | 468.3504 | -0.43274 | 0.157492 | -2.74773 | 0.006001 | 0.038343 |
| MFSD10    | 271.2063 | -0.76972 | 0.280169 | -2.74732 | 0.006008 | 0.038359 |
| ATP7A     | 2903.083 | -0.3243  | 0.118062 | -2.74689 | 0.006016 | 0.038386 |
| trfq      | 1471.121 | -0.44982 | 0.16385  | -2.74529 | 0.006046 | 0.038486 |
| CD27-AS1  | 283.7966 | -0.55679 | 0.202876 | -2.7445  | 0.00606  | 0.038554 |
| OSER1-AS1 | 251.2293 | -0.46283 | 0.168793 | -2.74203 | 0.006106 | 0.03879  |
| SRPX      | 597.3375 | -0.3478  | 0.126877 | -2.7412  | 0.006121 | 0.038856 |
| KREMEN1   | 1055.704 | -0.47956 | 0.175038 | -2.73974 | 0.006149 | 0.039013 |
| ABHD1     | 40.08664 | -0.92616 | 0.33813  | -2.73907 | 0.006161 | 0.039045 |
| R3HDM4    | 444.9041 | -0.59398 | 0.217035 | -2.7368  | 0.006204 | 0.039224 |
| FBXW4     | 233.7258 | -0.60755 | 0.222044 | -2.73619 | 0.006216 | 0.039251 |
| PCIF1     | 533.7355 | -0.59629 | 0.218003 | -2.73525 | 0.006233 | 0.03934  |
| LINC00482 | 15.82965 | -1.43649 | 0.525349 | -2.73435 | 0.00625  | 0.039431 |
| ZFPL1     | 323.948  | -0.75096 | 0.274696 | -2.7338  | 0.006261 | 0.039481 |
| ZNF446    | 112.6696 | -0.84083 | 0.307668 | -2.73293 | 0.006277 | 0.039544 |
| LONP1     | 1274.791 | -0.58958 | 0.215724 | -2.73304 | 0.006275 | 0.039544 |
| ACTN1     | 4540.458 | -0.42568 | 0.155763 | -2.73286 | 0.006279 | 0.039544 |
| S1PR2     | 192.002  | -0.56786 | 0.207858 | -2.73197 | 0.006296 | 0.039603 |
| EPOR      | 159.4972 | -0.647   | 0.236864 | -2.73153 | 0.006304 | 0.03964  |
| MPP3      | 269.0056 | -0.50846 | 0.186176 | -2.73108 | 0.006313 | 0.039677 |
| LZTS2     | 577.517  | -0.72729 | 0.266388 | -2.73021 | 0.006329 | 0.039751 |
| KCNK1     | 249.8877 | -0.52221 | 0.191316 | -2.72958 | 0.006342 | 0.039778 |



|          |          |          |          |          |          |          |
|----------|----------|----------|----------|----------|----------|----------|
| SIPA1L3  | 443.3931 | -0.46579 | 0.170637 | -2.72968 | 0.00634  | 0.039778 |
| TNFSF13  | 19.21771 | -1.28734 | 0.471955 | -2.72768 | 0.006378 | 0.039969 |
| MAN2B1   | 992.5405 | -0.61361 | 0.22499  | -2.7273  | 0.006386 | 0.039973 |
| HYOU1    | 6640.322 | -0.38747 | 0.142168 | -2.72541 | 0.006422 | 0.040137 |
| SELENOM  | 241.8992 | -0.75899 | 0.278531 | -2.72498 | 0.006431 | 0.040157 |
| NAPA-AS1 | 40.46442 | -0.92147 | 0.33823  | -2.72438 | 0.006442 | 0.040214 |
| PSG1     | 107.2149 | -0.65751 | 0.241401 | -2.72371 | 0.006455 | 0.040279 |
| SMOX     | 511.4901 | -0.59671 | 0.21939  | -2.71986 | 0.006531 | 0.040669 |
| OSBPL7   | 306.1987 | -0.56728 | 0.208593 | -2.71955 | 0.006537 | 0.040688 |
| EBP      | 1054.69  | -0.42519 | 0.156354 | -2.71944 | 0.006539 | 0.040688 |
| NREP     | 1133.837 | -0.3082  | 0.113425 | -2.71724 | 0.006583 | 0.040927 |
| ZBTB4    | 2480.955 | -0.35509 | 0.130756 | -2.71568 | 0.006614 | 0.041103 |
| CSAD     | 339.1064 | -0.44093 | 0.162406 | -2.71499 | 0.006628 | 0.041155 |
| MGAT5B   | 203.9366 | -0.61104 | 0.225219 | -2.7131  | 0.006666 | 0.041358 |
| PLCD3    | 465.5472 | -0.57673 | 0.212685 | -2.71165 | 0.006695 | 0.041484 |
| HDAC6    | 1219.063 | -0.52262 | 0.192729 | -2.71169 | 0.006694 | 0.041484 |
| SLC27A1  | 273.6022 | -0.69404 | 0.256085 | -2.71021 | 0.006724 | 0.041602 |
| PLPPR2   | 298.0414 | -0.56535 | 0.208699 | -2.70893 | 0.00675  | 0.041714 |
| LOC10050 | 99.25482 | -0.8197  | 0.302676 | -2.70817 | 0.006766 | 0.041793 |
| ATP1A1   | 7568.474 | -0.26971 | 0.099629 | -2.70718 | 0.006786 | 0.041884 |
| OSBPL2   | 1557.623 | -0.37517 | 0.13863  | -2.70625 | 0.006805 | 0.041952 |
| COL6A2   | 3514.048 | -1.15452 | 0.426799 | -2.70506 | 0.006829 | 0.04205  |
| NPY4R    | 99.86526 | -0.7642  | 0.282521 | -2.70493 | 0.006832 | 0.04205  |
| slc9a3r2 | 254.5627 | -0.68118 | 0.252041 | -2.70264 | 0.006879 | 0.042275 |
| CDC42EP2 | 130.6557 | -0.59182 | 0.218977 | -2.70267 | 0.006879 | 0.042275 |
| ACOT8    | 370.2141 | -0.52517 | 0.194432 | -2.70107 | 0.006912 | 0.042458 |
| CAPN5    | 198.3373 | -0.52904 | 0.19596  | -2.69976 | 0.006939 | 0.042608 |
| RFNG     | 246.7655 | -0.81258 | 0.301276 | -2.69711 | 0.006994 | 0.042881 |
| PLCD1    | 292.6472 | -0.55883 | 0.207237 | -2.69658 | 0.007006 | 0.042881 |
| ZNF747   | 158.2899 | -0.51863 | 0.192304 | -2.6969  | 0.006999 | 0.042881 |
| SIK1     | 176.8759 | -0.49721 | 0.18437  | -2.6968  | 0.007001 | 0.042881 |
| STAP2    | 266.6027 | -0.46196 | 0.171293 | -2.69689 | 0.006999 | 0.042881 |
| SUMF2    | 1953.916 | -0.34115 | 0.126557 | -2.69563 | 0.007026 | 0.042987 |
| DNM1P35  | 44.57559 | -0.8443  | 0.313255 | -2.69524 | 0.007034 | 0.042992 |
| PMM2     | 1081.463 | -0.34864 | 0.129347 | -2.69539 | 0.007031 | 0.042992 |
| VP551    | 542.0526 | -0.65183 | 0.241894 | -2.69467 | 0.007046 | 0.043024 |
| HOXD9    | 73.83125 | -0.67719 | 0.251424 | -2.69344 | 0.007072 | 0.043164 |
| ZNF264   | 1402.51  | -0.34704 | 0.128852 | -2.69333 | 0.007074 | 0.043164 |
| TPRG1L   | 420.5022 | -0.4268  | 0.158486 | -2.69297 | 0.007082 | 0.043194 |
| RPL36    | 2461.203 | -0.64694 | 0.24032  | -2.69198 | 0.007103 | 0.04327  |
| COL4A2   | 6714.437 | -0.54096 | 0.20098  | -2.6916  | 0.007111 | 0.043302 |
| EGFR-AS1 | 66.78555 | -0.85666 | 0.318322 | -2.69118 | 0.00712  | 0.04334  |
| FGGY     | 333.5548 | -0.39798 | 0.1479   | -2.69086 | 0.007127 | 0.043364 |
| AHNAK    | 102699   | -0.36707 | 0.136445 | -2.69027 | 0.007139 | 0.043424 |
| TTLL3    | 305.4659 | -0.4887  | 0.181679 | -2.68991 | 0.007147 | 0.043454 |
| PYCR1    | 2167.429 | -0.62497 | 0.232549 | -2.6875  | 0.007199 | 0.043717 |
| FCGRT    | 659.0044 | -0.61791 | 0.230013 | -2.68642 | 0.007222 | 0.043807 |

|           |          |          |          |          |          |          |
|-----------|----------|----------|----------|----------|----------|----------|
| BSDC1     | 1883.879 | -0.43317 | 0.161283 | -2.68581 | 0.007235 | 0.04387  |
| CELSR1    | 2085.158 | -0.41966 | 0.156336 | -2.68439 | 0.007266 | 0.044023 |
| SLC45A1   | 26.35742 | -1.07161 | 0.39938  | -2.68318 | 0.007293 | 0.044147 |
| WNK4      | 42.72183 | -0.86287 | 0.321673 | -2.68245 | 0.007308 | 0.044191 |
| MGRN1     | 432.9328 | -0.54179 | 0.201963 | -2.6826  | 0.007305 | 0.044191 |
| LZTR1     | 794.8    | -0.51975 | 0.193765 | -2.68235 | 0.007311 | 0.044191 |
| CLIP2     | 937.7974 | -0.63098 | 0.235398 | -2.68048 | 0.007352 | 0.0444   |
| NAT9      | 762.5072 | -0.52047 | 0.194236 | -2.67957 | 0.007372 | 0.044469 |
| CACNB3    | 371.6029 | -0.49424 | 0.184691 | -2.67605 | 0.00745  | 0.044904 |
| C2orf72   | 212.8628 | -0.47867 | 0.178927 | -2.67524 | 0.007468 | 0.044934 |
| KDELR2    | 13446.7  | -0.38249 | 0.143046 | -2.67393 | 0.007497 | 0.045047 |
| PIAS2     | 990.5504 | -0.37723 | 0.141124 | -2.67304 | 0.007517 | 0.045129 |
| dnase2    | 713.9502 | -0.51061 | 0.191082 | -2.67218 | 0.007536 | 0.045159 |
| LINC00896 | 32.08853 | -1.10062 | 0.411999 | -2.67142 | 0.007553 | 0.045192 |
| TMEM106   | 272.1759 | -0.46906 | 0.175675 | -2.67002 | 0.007585 | 0.045306 |
| TFE3      | 1170.662 | -0.40332 | 0.151053 | -2.67005 | 0.007584 | 0.045306 |
| TBL2      | 1179.442 | -0.38858 | 0.145518 | -2.67032 | 0.007578 | 0.045306 |
| SGSM3     | 942.1345 | -0.63025 | 0.23617  | -2.66864 | 0.007616 | 0.045427 |
| C9orf129  | 99.50185 | -0.87863 | 0.329298 | -2.66819 | 0.007626 | 0.045454 |
| CARD19    | 301.5819 | -0.71906 | 0.269494 | -2.6682  | 0.007626 | 0.045454 |
| AGPAT1    | 995.0696 | -0.46921 | 0.175869 | -2.66794 | 0.007632 | 0.045469 |
| EME2      | 32.65339 | -1.09341 | 0.409941 | -2.66724 | 0.007648 | 0.045511 |
| PDXDC1    | 5732.43  | -0.401   | 0.150341 | -2.66726 | 0.007647 | 0.045511 |
| PDXDC2P   | 1296.102 | -0.4129  | 0.154824 | -2.66692 | 0.007655 | 0.045537 |
| ZFYVE28   | 58.64614 | -0.79068 | 0.296501 | -2.6667  | 0.00766  | 0.04555  |
| LINC01011 | 84.47928 | -0.6907  | 0.259107 | -2.66571 | 0.007683 | 0.045597 |
| CPQ       | 483.6606 | -0.39698 | 0.1489   | -2.66611 | 0.007673 | 0.045597 |
| PAPSS2    | 2746.868 | -0.30238 | 0.113476 | -2.66472 | 0.007705 | 0.045713 |
| SLC9A3    | 114.451  | -0.81949 | 0.307605 | -2.6641  | 0.007719 | 0.045762 |
| CRTC1     | 175.7836 | -0.57836 | 0.21714  | -2.66352 | 0.007733 | 0.045824 |
| C19orf24  | 84.20164 | -0.83251 | 0.312629 | -2.66293 | 0.007746 | 0.045887 |
| LMBR1L    | 409.7273 | -0.45052 | 0.169284 | -2.66133 | 0.007783 | 0.046017 |
| LINC01605 | 43.8375  | -0.85095 | 0.319766 | -2.66116 | 0.007787 | 0.046022 |
| ACTL10    | 73.18484 | -0.66938 | 0.251703 | -2.65941 | 0.007828 | 0.046209 |
| VIPR2     | 45.34636 | -0.99368 | 0.37369  | -2.65912 | 0.007835 | 0.046232 |
| DMWD      | 324.1658 | -0.50763 | 0.190995 | -2.65784 | 0.007864 | 0.046354 |
| FN3K      | 27.83762 | -1.09495 | 0.412005 | -2.65762 | 0.00787  | 0.046367 |
| PCDHB19P  | 22.58895 | -1.27173 | 0.478644 | -2.65693 | 0.007886 | 0.046426 |
| SHISA4    | 340.6883 | -0.61877 | 0.232907 | -2.65673 | 0.00789  | 0.046436 |
| LOC72861  | 40.36913 | -0.84478 | 0.318067 | -2.65598 | 0.007908 | 0.046504 |
| UNC45A    | 1295.822 | -0.58302 | 0.219715 | -2.65354 | 0.007965 | 0.046734 |
| SLC38A10  | 654.088  | -0.58752 | 0.221426 | -2.65335 | 0.00797  | 0.046741 |
| NUMBL     | 352.9976 | -0.58372 | 0.220236 | -2.65042 | 0.008039 | 0.047026 |
| FAM46C    | 230.3388 | -0.5553  | 0.20954  | -2.65011 | 0.008046 | 0.047051 |
| RPL8      | 9642.481 | -0.55025 | 0.207664 | -2.64973 | 0.008056 | 0.047087 |
| RAB11FIP1 | 176.0193 | -0.51712 | 0.195196 | -2.64923 | 0.008068 | 0.047138 |
| ABCD1     | 171.9881 | -0.77262 | 0.291828 | -2.64751 | 0.008109 | 0.047325 |

|            |          |          |          |          |          |          |
|------------|----------|----------|----------|----------|----------|----------|
| TADA3      | 933.4211 | -0.47299 | 0.178667 | -2.64734 | 0.008113 | 0.04733  |
| LYSMD3     | 1477.309 | -0.43612 | 0.164896 | -2.64483 | 0.008173 | 0.047629 |
| IGBP1      | 1273.045 | -0.33346 | 0.126121 | -2.64395 | 0.008194 | 0.047721 |
| SNX29      | 594.1011 | -0.36757 | 0.139095 | -2.64261 | 0.008227 | 0.047852 |
| TOM1L2     | 742.1135 | -0.45617 | 0.172862 | -2.63892 | 0.008317 | 0.048267 |
| ENG        | 631.3725 | -0.53713 | 0.203575 | -2.63847 | 0.008328 | 0.048295 |
| MLEC       | 8028.479 | -0.29159 | 0.110511 | -2.63855 | 0.008326 | 0.048295 |
| HMG20B     | 929.7916 | -0.55605 | 0.210806 | -2.63775 | 0.008346 | 0.048379 |
| PCED1B     | 89.27285 | -0.61816 | 0.234394 | -2.63727 | 0.008358 | 0.048429 |
| YIPF3      | 1631.532 | -0.54552 | 0.206895 | -2.63671 | 0.008371 | 0.048491 |
| OSBPL10    | 359.2494 | -0.39174 | 0.148629 | -2.63571 | 0.008396 | 0.048616 |
| PLEKHA2    | 3129.054 | -0.35212 | 0.133617 | -2.63532 | 0.008406 | 0.048653 |
| ULK1       | 393.0758 | -0.53823 | 0.204337 | -2.63402 | 0.008438 | 0.048804 |
| PRRC2B     | 4543.783 | -0.39054 | 0.148366 | -2.63225 | 0.008482 | 0.049022 |
| METRNL     | 186.4956 | -0.681   | 0.258896 | -2.63038 | 0.008529 | 0.049274 |
| Mirlet7bhξ | 579.4909 | -0.591   | 0.224784 | -2.6292  | 0.008559 | 0.04939  |
| DNASE1     | 252.6212 | -0.48199 | 0.183401 | -2.62804 | 0.008588 | 0.04954  |
| RPAP1      | 573.4553 | -0.44448 | 0.16922  | -2.62663 | 0.008623 | 0.049721 |
| RPLP1      | 2373.318 | -0.58359 | 0.222243 | -2.62593 | 0.008641 | 0.04978  |
| CREB3L2    | 2836.261 | -0.41818 | 0.159354 | -2.62421 | 0.008685 | 0.049971 |
