# Supplementary material for: RNA Sequencing in Hypoxia-Adapted T98G Glioblastoma Cells Provides Supportive Evidence for IRE1 as a Potential Therapeutic Target
Source: MDPI journal article supplement (doi:10.3390/genes14040841), 2023-03-31
Supplement: s1 [file s1]

Supplementary Table S2. All DEGs identified at  $p < 0.05$  with negative log2Fold Changes representing genes upregulated in hypoxia.

| GeneID    | baseMean | log2Fold | CI lfcSE | stat     | p value  | q value  |
|-----------|----------|----------|----------|----------|----------|----------|
| CA9       | 665.8842 | -4.11644 | 0.204531 | -20.1262 | 4.35E-90 | 6.71E-86 |
| ENO2      | 3284.891 | -2.09449 | 0.117369 | -17.8454 | 3.14E-71 | 2.42E-67 |
| NDRG1     | 35485.88 | -2.39942 | 0.152605 | -15.7231 | 1.05E-55 | 5.41E-52 |
| ppfia4    | 255.6877 | -2.59846 | 0.182142 | -14.2661 | 3.56E-46 | 1.37E-42 |
| TGFBI     | 85814.17 | -1.63369 | 0.114908 | -14.2174 | 7.14E-46 | 2.20E-42 |
| HILPDA    | 843.1286 | -1.77678 | 0.128509 | -13.8261 | 1.77E-43 | 4.56E-40 |
| FER1L4    | 2989.299 | -1.98718 | 0.146885 | -13.5288 | 1.06E-41 | 2.33E-38 |
| EGLN3     | 1170.532 | -1.78259 | 0.133873 | -13.3155 | 1.88E-40 | 3.63E-37 |
| PI15      | 2669.702 | 1.78405  | 0.13761  | 12.9645  | 1.94E-38 | 3.34E-35 |
| PGK1      | 49351.24 | -1.37506 | 0.108421 | -12.6826 | 7.39E-37 | 1.14E-33 |
| PFKFB4    | 1070.35  | -2.31271 | 0.182807 | -12.6511 | 1.10E-36 | 1.55E-33 |
| SLC2A1    | 8291.498 | -1.76037 | 0.139863 | -12.5864 | 2.51E-36 | 3.23E-33 |
| FAM162A   | 1039.344 | -1.83736 | 0.1529   | -12.0167 | 2.90E-33 | 3.45E-30 |
| TCAF2     | 613.8003 | -2.05934 | 0.17164  | -11.998  | 3.64E-33 | 4.01E-30 |
| LOC154761 | 303.6035 | -2.12835 | 0.185299 | -11.4861 | 1.55E-30 | 1.60E-27 |
| CP        | 2728.579 | -1.69845 | 0.15156  | -11.2064 | 3.79E-29 | 3.55E-26 |
| FUT11     | 526.6089 | -1.53173 | 0.136717 | -11.2036 | 3.91E-29 | 3.55E-26 |
| EGR1      | 877.8106 | 2.491494 | 0.222938 | 11.17573 | 5.36E-29 | 4.60E-26 |
| LOXL2     | 12150.35 | -1.62642 | 0.14595  | -11.1437 | 7.69E-29 | 6.25E-26 |
| LOX       | 6225.593 | -1.82033 | 0.164795 | -11.046  | 2.29E-28 | 1.77E-25 |
| SPAG4     | 808.9875 | -1.99385 | 0.18125  | -11.0005 | 3.80E-28 | 2.79E-25 |
| COL1A2    | 49282.48 | -1.54984 | 0.143933 | -10.7678 | 4.89E-27 | 3.43E-24 |
| TMEM45A   | 610.9382 | -1.56936 | 0.145828 | -10.7617 | 5.22E-27 | 3.50E-24 |
| ZP1       | 94.46856 | -3.2455  | 0.304948 | -10.6428 | 1.88E-26 | 1.21E-23 |
| GPI       | 23822.39 | -1.54554 | 0.148437 | -10.4121 | 2.18E-25 | 1.35E-22 |
| PPP1R3C   | 287.535  | -1.85462 | 0.181286 | -10.2304 | 1.45E-24 | 8.61E-22 |
| CTGF      | 1097.947 | 1.64391  | 0.161169 | 10.19995 | 1.98E-24 | 1.13E-21 |
| CYR61     | 3677.11  | 1.468209 | 0.144759 | 10.14246 | 3.58E-24 | 1.97E-21 |
| SLITRK6   | 180.9013 | -2.2006  | 0.217348 | -10.1247 | 4.29E-24 | 2.28E-21 |
| SLC6A8    | 522.5746 | -1.71239 | 0.170208 | -10.0606 | 8.25E-24 | 4.24E-21 |
| C4orf3    | 2079.111 | -1.14344 | 0.114035 | -10.0271 | 1.16E-23 | 5.77E-21 |
| ANGPTL4   | 91.34349 | -3.04458 | 0.313346 | -9.71636 | 2.57E-22 | 1.24E-19 |
| GRIN2A    | 471.3608 | -1.46246 | 0.152099 | -9.61515 | 6.90E-22 | 3.23E-19 |
| HK2       | 5138.288 | -1.30157 | 0.135941 | -9.57457 | 1.02E-21 | 4.64E-19 |
| CLEC3B    | 59.10292 | -3.81532 | 0.40001  | -9.53807 | 1.46E-21 | 6.42E-19 |
| SH3D21    | 440.1832 | -1.43444 | 0.152093 | -9.43136 | 4.05E-21 | 1.74E-18 |
| FOS       | 295.3963 | 2.383275 | 0.253047 | 9.418324 | 4.58E-21 | 1.91E-18 |
| RNASE4    | 118.8881 | -2.21288 | 0.235662 | -9.39006 | 6.00E-21 | 2.44E-18 |
| PLIN2     | 1931.412 | -1.12774 | 0.120227 | -9.38005 | 6.59E-21 | 2.61E-18 |
| MAP7D2    | 211.0734 | -2.75481 | 0.295073 | -9.33601 | 1.00E-20 | 3.86E-18 |
| PTPRF     | 5316.253 | -1.52317 | 0.16359  | -9.3109  | 1.27E-20 | 4.77E-18 |
| ARFGEF3   | 226.1747 | -1.95876 | 0.210854 | -9.28967 | 1.55E-20 | 5.69E-18 |
| RORA      | 143.552  | -2.15375 | 0.234109 | -9.19978 | 3.59E-20 | 1.29E-17 |
| BNIP3     | 6206.287 | -1.22365 | 0.133079 | -9.19494 | 3.75E-20 | 1.32E-17 |
| COL5A1    | 10315.52 | -1.42773 | 0.155459 | -9.18398 | 4.15E-20 | 1.43E-17 |
| P4HA2     | 5520.261 | -1.18323 | 0.129071 | -9.16729 | 4.85E-20 | 1.63E-17 |
| TFRC      | 7722.422 | 1.640606 | 0.180698 | 9.079288 | 1.09E-19 | 3.59E-17 |
| MXI1      | 1078.35  | -1.27286 | 0.141259 | -9.01082 | 2.05E-19 | 6.58E-17 |
| IRS2      | 994.4374 | -1.18254 | 0.134172 | -8.81359 | 1.21E-18 | 3.82E-16 |

|           |          |          |          |          |          |          |
|-----------|----------|----------|----------|----------|----------|----------|
| ADM       | 4056.903 | -1.13932 | 0.130104 | -8.75704 | 2.00E-18 | 6.19E-16 |
| CXCL8     | 299.0977 | 1.839728 | 0.212647 | 8.651543 | 5.08E-18 | 1.54E-15 |
| P4HA1     | 7807.005 | -1.2489  | 0.144462 | -8.64514 | 5.37E-18 | 1.60E-15 |
| MT1X      | 996.9279 | -1.67277 | 0.193759 | -8.63324 | 5.96E-18 | 1.74E-15 |
| ADSSL1    | 239.9459 | -1.69544 | 0.197701 | -8.57575 | 9.84E-18 | 2.81E-15 |
| MIR210HG  | 650.4534 | -1.92404 | 0.226177 | -8.50681 | 1.79E-17 | 5.02E-15 |
| TGM2      | 280.4677 | -1.59079 | 0.18727  | -8.49463 | 1.99E-17 | 5.47E-15 |
| ZNF395    | 3944.913 | -1.13319 | 0.134585 | -8.41992 | 3.77E-17 | 1.02E-14 |
| PFKFB3    | 2380.493 | -1.00184 | 0.120336 | -8.3253  | 8.41E-17 | 2.24E-14 |
| CALR      | 23524.14 | -0.85033 | 0.104055 | -8.1719  | 3.04E-16 | 7.87E-14 |
| STC1      | 4077.496 | -0.87326 | 0.106873 | -8.17103 | 3.06E-16 | 7.87E-14 |
| AK4       | 1862.924 | -1.19529 | 0.149051 | -8.01934 | 1.06E-15 | 2.69E-13 |
| TNFRSF11B | 4666.286 | 1.487649 | 0.187016 | 7.95465  | 1.80E-15 | 4.47E-13 |
| ERO1A     | 2775.035 | -1.17082 | 0.149403 | -7.83665 | 4.63E-15 | 1.13E-12 |
| KITLG     | 1394.838 | 0.991629 | 0.128947 | 7.690227 | 1.47E-14 | 3.49E-12 |
| DUSP1     | 1051.617 | 1.497167 | 0.195303 | 7.665878 | 1.78E-14 | 4.09E-12 |
| IGFBP3    | 51153.04 | -1.4077  | 0.185495 | -7.58891 | 3.23E-14 | 7.32E-12 |
| INHBA     | 921.0562 | -1.75491 | 0.234393 | -7.48704 | 7.04E-14 | 1.58E-11 |
| c4orf47   | 33.11993 | -4.06378 | 0.544862 | -7.45836 | 8.76E-14 | 1.91E-11 |
| POP1      | 783.1456 | 1.249457 | 0.167539 | 7.457714 | 8.80E-14 | 1.91E-11 |
| PLOD1     | 6188.207 | -1.41831 | 0.190386 | -7.44967 | 9.36E-14 | 2.01E-11 |
| BNIP3L    | 8069.484 | -0.86675 | 0.118362 | -7.32284 | 2.43E-13 | 5.13E-11 |
| lacc1     | 606.4675 | 1.26657  | 0.173179 | 7.313664 | 2.60E-13 | 5.42E-11 |
| PSAT1     | 1533.36  | 1.325041 | 0.181923 | 7.283531 | 3.25E-13 | 6.69E-11 |
| GAPDH     | 110739.3 | -1.33984 | 0.184725 | -7.25317 | 4.07E-13 | 8.27E-11 |
| VEGFA     | 1585.789 | -1.0239  | 0.141393 | -7.2415  | 4.44E-13 | 8.90E-11 |
| PDGFB     | 69.83487 | -2.11138 | 0.293525 | -7.1932  | 6.33E-13 | 1.25E-10 |
| ACAP1     | 162.4227 | -1.94645 | 0.270734 | -7.18953 | 6.50E-13 | 1.27E-10 |
| AFDN      | 2213.592 | -0.84556 | 0.117844 | -7.17527 | 7.22E-13 | 1.39E-10 |
| FAM13A    | 1322.198 | -0.88974 | 0.124265 | -7.16004 | 8.07E-13 | 1.54E-10 |
| F3        | 1062.589 | -0.96678 | 0.136415 | -7.087   | 1.37E-12 | 2.58E-10 |
| LPCAT1    | 1391.533 | -0.96755 | 0.137339 | -7.04497 | 1.86E-12 | 3.45E-10 |
| VIM       | 42594.04 | -0.69942 | 0.099445 | -7.03324 | 2.02E-12 | 3.71E-10 |
| GJA1      | 1843.891 | -0.96358 | 0.137945 | -6.98524 | 2.84E-12 | 5.16E-10 |
| NMU       | 75.71724 | -1.9047  | 0.273122 | -6.97379 | 3.09E-12 | 5.54E-10 |
| PIK3R3    | 670.3225 | 0.985647 | 0.141609 | 6.960314 | 3.40E-12 | 6.02E-10 |
| CAMK2N1   | 1201.002 | -1.0129  | 0.145664 | -6.95369 | 3.56E-12 | 6.24E-10 |
| STC2      | 3565.387 | -0.82372 | 0.119097 | -6.91635 | 4.63E-12 | 7.96E-10 |
| DDX5      | 13116.55 | 0.800512 | 0.115746 | 6.916121 | 4.64E-12 | 7.96E-10 |
| FAM46A    | 2421.846 | -0.94212 | 0.136803 | -6.88671 | 5.71E-12 | 9.67E-10 |
| NRN1      | 1075.423 | -0.95734 | 0.139041 | -6.88533 | 5.77E-12 | 9.67E-10 |
| GYS1      | 1379.218 | -1.16977 | 0.169991 | -6.88136 | 5.93E-12 | 9.80E-10 |
| VLDLR     | 209.8958 | -1.34368 | 0.195288 | -6.88048 | 5.97E-12 | 9.80E-10 |
| PAM       | 9804.993 | -0.90985 | 0.132733 | -6.85474 | 7.14E-12 | 1.16E-09 |
| PTPRN     | 418.1848 | -1.45538 | 0.212928 | -6.83509 | 8.20E-12 | 1.32E-09 |
| WISP1     | 912.8539 | -1.03124 | 0.151533 | -6.80538 | 1.01E-11 | 1.60E-09 |
| SMIM3     | 1237.176 | -0.97128 | 0.143491 | -6.76891 | 1.30E-11 | 2.04E-09 |
| LRP1      | 4083.528 | -1.38651 | 0.204899 | -6.76678 | 1.32E-11 | 2.05E-09 |
| ENO1      | 58843.73 | -0.89106 | 0.131883 | -6.75646 | 1.41E-11 | 2.18E-09 |
| MCF2L     | 648.2869 | -0.99186 | 0.147427 | -6.72782 | 1.72E-11 | 2.63E-09 |

|             |          |          |          |          |          |          |
|-------------|----------|----------|----------|----------|----------|----------|
| RDH10       | 901.3256 | 0.869352 | 0.129363 | 6.720276 | 1.81E-11 | 2.75E-09 |
| PLOD2       | 16997.72 | -0.91751 | 0.138106 | -6.64353 | 3.06E-11 | 4.59E-09 |
| P4HB        | 10391.73 | -0.9751  | 0.146883 | -6.63861 | 3.17E-11 | 4.70E-09 |
| PCNA        | 3854.774 | 0.980489 | 0.148324 | 6.610442 | 3.83E-11 | 5.63E-09 |
| INSIG2      | 595.0636 | -1.18068 | 0.178919 | -6.59894 | 4.14E-11 | 6.03E-09 |
| NOL3        | 645.7815 | -1.2332  | 0.186966 | -6.59587 | 4.23E-11 | 6.10E-09 |
| TAF9B       | 2200.479 | -1.09181 | 0.165796 | -6.58523 | 4.54E-11 | 6.49E-09 |
| MAGED4B     | 506.1022 | -1.22598 | 0.187597 | -6.53515 | 6.35E-11 | 9.00E-09 |
| snx33       | 809.2986 | -1.07712 | 0.164884 | -6.53261 | 6.46E-11 | 9.07E-09 |
| CEP250      | 3656.618 | -0.81954 | 0.125981 | -6.50524 | 7.76E-11 | 1.08E-08 |
| ANKZF1      | 1464.704 | -0.92935 | 0.143011 | -6.49845 | 8.12E-11 | 1.12E-08 |
| SDK1        | 960.6936 | -0.82462 | 0.126998 | -6.4932  | 8.40E-11 | 1.15E-08 |
| PDK1        | 4409.011 | -0.96217 | 0.148237 | -6.49079 | 8.54E-11 | 1.16E-08 |
| WDR54       | 700.802  | -1.12005 | 0.173103 | -6.47046 | 9.77E-11 | 1.31E-08 |
| CDCA7       | 2235.654 | 0.713928 | 0.110635 | 6.45299  | 1.10E-10 | 1.46E-08 |
| SCG5        | 211.3164 | 1.267086 | 0.196564 | 6.446181 | 1.15E-10 | 1.51E-08 |
| MYLK        | 16176.42 | -0.62918 | 0.097982 | -6.42136 | 1.35E-10 | 1.77E-08 |
| APCDD1L-AS1 | 587.0755 | -0.86021 | 0.134124 | -6.41354 | 1.42E-10 | 1.84E-08 |
| SHISA2      | 235.052  | 1.048679 | 0.163668 | 6.407364 | 1.48E-10 | 1.90E-08 |
| apcdd1l     | 190.8491 | -1.22179 | 0.190837 | -6.40224 | 1.53E-10 | 1.95E-08 |
| TMEM158     | 562.7468 | -1.03974 | 0.162667 | -6.39184 | 1.64E-10 | 2.07E-08 |
| H1FO        | 704.2118 | -0.82037 | 0.128454 | -6.38648 | 1.70E-10 | 2.13E-08 |
| TPI1        | 22070.83 | -0.96427 | 0.151604 | -6.36045 | 2.01E-10 | 2.50E-08 |
| MT2A        | 1899.648 | -1.26748 | 0.200381 | -6.32538 | 2.53E-10 | 3.12E-08 |
| SFPQ        | 7584.664 | 0.795397 | 0.126042 | 6.31056  | 2.78E-10 | 3.41E-08 |
| COL6A3      | 270324   | -0.73711 | 0.116855 | -6.30788 | 2.83E-10 | 3.44E-08 |
| Maged4      | 501.3265 | -1.20629 | 0.191269 | -6.30679 | 2.85E-10 | 3.44E-08 |
| NPTX1       | 2471.145 | -0.74044 | 0.117638 | -6.29421 | 3.09E-10 | 3.67E-08 |
| HSPA8       | 40716.35 | 0.706301 | 0.112216 | 6.294108 | 3.09E-10 | 3.67E-08 |
| NEDD9       | 372.259  | -1.04919 | 0.167339 | -6.26985 | 3.61E-10 | 4.26E-08 |
| PFKP        | 5698.102 | -0.9153  | 0.146647 | -6.24153 | 4.33E-10 | 5.07E-08 |
| MYO1E       | 1778.658 | -0.7211  | 0.115599 | -6.23791 | 4.43E-10 | 5.15E-08 |
| ADAM12      | 1099.699 | -1.015   | 0.163016 | -6.2264  | 4.77E-10 | 5.50E-08 |
| DLGAP4      | 592.848  | -0.86686 | 0.139537 | -6.21241 | 5.22E-10 | 5.93E-08 |
| FLNB        | 16400.82 | -0.83937 | 0.135117 | -6.2122  | 5.22E-10 | 5.93E-08 |
| TRA2B       | 4366.643 | 0.773512 | 0.124615 | 6.207202 | 5.39E-10 | 6.08E-08 |
| GADD45A     | 783.5922 | 0.83058  | 0.134204 | 6.18896  | 6.06E-10 | 6.75E-08 |
| HSF4        | 330.1782 | -1.43466 | 0.231829 | -6.18843 | 6.08E-10 | 6.75E-08 |
| GART        | 3448.805 | 0.659168 | 0.10657  | 6.185335 | 6.20E-10 | 6.83E-08 |
| MPI         | 1234.908 | -1.02375 | 0.165595 | -6.18223 | 6.32E-10 | 6.92E-08 |
| PMAIP1      | 1088.664 | 0.909972 | 0.14742  | 6.172671 | 6.71E-10 | 7.30E-08 |
| PPP1R3B     | 773.6174 | -0.95362 | 0.154705 | -6.16408 | 7.09E-10 | 7.65E-08 |
| IER2        | 623.5147 | 1.114078 | 0.180974 | 6.15601  | 7.46E-10 | 8.00E-08 |
| TPP1        | 1143.063 | -0.74466 | 0.121619 | -6.1229  | 9.19E-10 | 9.78E-08 |
| IGFBP6      | 867.1748 | -1.26678 | 0.207195 | -6.11395 | 9.72E-10 | 1.03E-07 |
| SPARC       | 24158.33 | -0.82612 | 0.13518  | -6.11125 | 9.89E-10 | 1.04E-07 |
| SCARB1      | 953.2647 | -1.13328 | 0.185713 | -6.10229 | 1.05E-09 | 1.09E-07 |
| TIGAR       | 174.8846 | 1.289796 | 0.211424 | 6.100532 | 1.06E-09 | 1.10E-07 |
| COL7A1      | 4191.673 | -1.35372 | 0.222142 | -6.09393 | 1.10E-09 | 1.13E-07 |
| PAG1        | 1063.969 | -0.83583 | 0.137279 | -6.08857 | 1.14E-09 | 1.16E-07 |

|           |          |          |          |          |          |          |
|-----------|----------|----------|----------|----------|----------|----------|
| GSG2      | 424.1537 | 0.861177 | 0.141871 | 6.07013  | 1.28E-09 | 1.30E-07 |
| ZNF367    | 548.71   | 0.826676 | 0.136542 | 6.054383 | 1.41E-09 | 1.42E-07 |
| KLHL23    | 292.2275 | 1.029756 | 0.170475 | 6.040503 | 1.54E-09 | 1.54E-07 |
| CCNE2     | 893.0958 | 0.894382 | 0.148077 | 6.039986 | 1.54E-09 | 1.54E-07 |
| PLAUR     | 455.9481 | -1.09597 | 0.181709 | -6.03146 | 1.62E-09 | 1.61E-07 |
| SLPI      | 382.5299 | -1.20025 | 0.199787 | -6.00762 | 1.88E-09 | 1.85E-07 |
| AXL       | 8835.102 | -0.71528 | 0.119165 | -6.00245 | 1.94E-09 | 1.90E-07 |
| AUNIP     | 166.7726 | 1.28921  | 0.215088 | 5.993864 | 2.05E-09 | 1.99E-07 |
| PRSS53    | 135.2772 | -1.65936 | 0.278294 | -5.96262 | 2.48E-09 | 2.39E-07 |
| PGM1      | 4993.07  | -0.74547 | 0.125133 | -5.95744 | 2.56E-09 | 2.45E-07 |
| PLBD2     | 359.7707 | -1.13019 | 0.189728 | -5.95692 | 2.57E-09 | 2.45E-07 |
| COL5A2    | 9110.532 | -0.62783 | 0.105684 | -5.94065 | 2.84E-09 | 2.69E-07 |
| JPH2      | 271.5398 | -1.15527 | 0.195192 | -5.91864 | 3.25E-09 | 3.06E-07 |
| vkorc1    | 1572.493 | -1.01725 | 0.17231  | -5.90362 | 3.56E-09 | 3.33E-07 |
| SLC6A6    | 15329.28 | -0.68541 | 0.116455 | -5.88562 | 3.97E-09 | 3.69E-07 |
| HEATR3    | 600.0289 | 0.801331 | 0.136362 | 5.876518 | 4.19E-09 | 3.87E-07 |
| CD68      | 1659.363 | -1.05216 | 0.179196 | -5.87153 | 4.32E-09 | 3.97E-07 |
| c21orf91  | 1611.904 | 0.6895   | 0.117621 | 5.862033 | 4.57E-09 | 4.18E-07 |
| LUCAT1    | 3183.657 | 0.688319 | 0.117573 | 5.854385 | 4.79E-09 | 4.35E-07 |
| KLF7      | 359.6017 | -0.92138 | 0.157434 | -5.85247 | 4.84E-09 | 4.37E-07 |
| EXO1      | 2011.458 | 0.857153 | 0.146623 | 5.845947 | 5.04E-09 | 4.52E-07 |
| ITPR1     | 1239.26  | -0.80553 | 0.137959 | -5.83895 | 5.25E-09 | 4.69E-07 |
| IGFBP5    | 206249.3 | -0.9516  | 0.163001 | -5.83802 | 5.28E-09 | 4.69E-07 |
| MCM10     | 921.1119 | 0.96972  | 0.166285 | 5.831673 | 5.49E-09 | 4.84E-07 |
| FAM111B   | 924.3134 | 1.119156 | 0.192398 | 5.816894 | 6.00E-09 | 5.23E-07 |
| ARMCX2    | 250.5341 | -1.13433 | 0.195568 | -5.8002  | 6.62E-09 | 5.71E-07 |
| MCM3      | 3922.175 | 0.734859 | 0.126989 | 5.786793 | 7.17E-09 | 6.15E-07 |
| TBC1D8B   | 755.2171 | -1.0207  | 0.176417 | -5.78572 | 7.22E-09 | 6.16E-07 |
| ITGB4     | 105.6538 | -1.35817 | 0.235211 | -5.77425 | 7.73E-09 | 6.56E-07 |
| BHLHE40   | 3369.639 | -0.90519 | 0.157007 | -5.76531 | 8.15E-09 | 6.84E-07 |
| IQGAP2    | 380.7855 | 0.865655 | 0.150188 | 5.763827 | 8.22E-09 | 6.86E-07 |
| LOC729915 | 239.1374 | -0.96614 | 0.167738 | -5.75983 | 8.42E-09 | 6.99E-07 |
| CDC25A    | 532.5141 | 0.936443 | 0.162728 | 5.754652 | 8.68E-09 | 7.17E-07 |
| Mt1f      | 110.0354 | -1.26871 | 0.221152 | -5.73682 | 9.65E-09 | 7.92E-07 |
| ITGBL1    | 1657.301 | -0.86956 | 0.151786 | -5.72887 | 1.01E-08 | 8.26E-07 |
| PLXNA3    | 595.3862 | -1.33782 | 0.233969 | -5.71796 | 1.08E-08 | 8.76E-07 |
| WDR76     | 1455.676 | 0.826085 | 0.144525 | 5.715846 | 1.09E-08 | 8.82E-07 |
| SDC4      | 1485.698 | -0.73442 | 0.128678 | -5.70747 | 1.15E-08 | 9.22E-07 |
| MCMBP     | 2228.833 | 0.638522 | 0.112036 | 5.699282 | 1.20E-08 | 9.62E-07 |
| FH        | 2535.557 | 0.632683 | 0.111114 | 5.694015 | 1.24E-08 | 9.87E-07 |
| GPATCH4   | 583.4927 | 0.742189 | 0.130575 | 5.684017 | 1.32E-08 | 1.04E-06 |
| ANXA8     | 273.1701 | -0.92062 | 0.162729 | -5.65735 | 1.54E-08 | 1.21E-06 |
| ENTPD1    | 438.7558 | 0.800894 | 0.142104 | 5.635974 | 1.74E-08 | 1.36E-06 |
| MYDGF     | 1767.192 | -0.89364 | 0.15856  | -5.63597 | 1.74E-08 | 1.36E-06 |
| slc12a8   | 3866.045 | -0.67335 | 0.119947 | -5.61376 | 1.98E-08 | 1.54E-06 |
| PFKFB2    | 561.4499 | 0.73704  | 0.131393 | 5.609414 | 2.03E-08 | 1.57E-06 |
| COA7      | 559.5563 | 0.719686 | 0.128334 | 5.607929 | 2.05E-08 | 1.57E-06 |
| LINC00887 | 24.60958 | -3.11793 | 0.556131 | -5.60647 | 2.06E-08 | 1.58E-06 |
| NOP56     | 3518.039 | 0.58398  | 0.104198 | 5.604529 | 2.09E-08 | 1.59E-06 |
| SPANXA2   | 412.8051 | -1.03079 | 0.184665 | -5.58194 | 2.38E-08 | 1.80E-06 |

|              |          |          |          |          |          |          |
|--------------|----------|----------|----------|----------|----------|----------|
| TMSB10       | 25668    | -0.73119 | 0.131202 | -5.57299 | 2.50E-08 | 1.89E-06 |
| EHD2         | 1120.327 | -1.09208 | 0.19636  | -5.56162 | 2.67E-08 | 2.00E-06 |
| AHNAK2       | 489.3014 | -0.88358 | 0.158938 | -5.55926 | 2.71E-08 | 2.02E-06 |
| GPRC5B       | 477.4904 | -0.81443 | 0.146742 | -5.55013 | 2.85E-08 | 2.12E-06 |
| THEMIS2      | 165.3938 | -1.10258 | 0.198764 | -5.54717 | 2.90E-08 | 2.14E-06 |
| CYCS         | 6820.99  | 0.778907 | 0.140572 | 5.540995 | 3.01E-08 | 2.21E-06 |
| TFPI2        | 356.785  | -1.27751 | 0.230573 | -5.5406  | 3.01E-08 | 2.21E-06 |
| CLSPN        | 1196.813 | 1.056944 | 0.190952 | 5.535138 | 3.11E-08 | 2.26E-06 |
| FSCN1        | 508.6272 | -1.35635 | 0.245101 | -5.53386 | 3.13E-08 | 2.27E-06 |
| PPARGC1B     | 341.8861 | 0.896473 | 0.162132 | 5.529277 | 3.22E-08 | 2.32E-06 |
| tsen15       | 1518.106 | 0.724348 | 0.131262 | 5.51835  | 3.42E-08 | 2.46E-06 |
| PDIA4        | 9415.702 | -0.67156 | 0.121787 | -5.51421 | 3.50E-08 | 2.50E-06 |
| DNA2         | 689.2989 | 0.841584 | 0.152653 | 5.513055 | 3.53E-08 | 2.51E-06 |
| CADM1        | 12491.34 | -0.72657 | 0.132028 | -5.50316 | 3.73E-08 | 2.64E-06 |
| NASP         | 5272.571 | 0.687186 | 0.125006 | 5.497239 | 3.86E-08 | 2.71E-06 |
| POLD3        | 1877.853 | 0.676032 | 0.122987 | 5.496783 | 3.87E-08 | 2.71E-06 |
| LOC100506055 | 1966.524 | -0.62774 | 0.114236 | -5.49508 | 3.91E-08 | 2.73E-06 |
| RFC3         | 1624.258 | 0.802648 | 0.146219 | 5.489368 | 4.03E-08 | 2.80E-06 |
| ODC1         | 859.7376 | 0.93184  | 0.169969 | 5.482407 | 4.20E-08 | 2.90E-06 |
| KCTD11       | 399.2022 | -0.98291 | 0.17938  | -5.47952 | 4.26E-08 | 2.94E-06 |
| ENC1         | 839.5628 | 0.685143 | 0.125217 | 5.471645 | 4.46E-08 | 3.06E-06 |
| MT1E         | 395.6526 | -0.82867 | 0.151763 | -5.46031 | 4.75E-08 | 3.25E-06 |
| FAM219A      | 736.5745 | -0.73148 | 0.13399  | -5.45925 | 4.78E-08 | 3.25E-06 |
| ARTN         | 37.19101 | -2.07432 | 0.380048 | -5.45804 | 4.81E-08 | 3.26E-06 |
| EFNA3        | 78.53282 | -1.53772 | 0.281831 | -5.45617 | 4.87E-08 | 3.28E-06 |
| CA12         | 2665.836 | -0.70909 | 0.130024 | -5.45354 | 4.94E-08 | 3.31E-06 |
| ALDOA        | 31747.94 | -1.28135 | 0.235294 | -5.44573 | 5.16E-08 | 3.45E-06 |
| EGFR         | 4765.049 | -0.69742 | 0.128105 | -5.4441  | 5.21E-08 | 3.46E-06 |
| MAF          | 582.8859 | -0.94544 | 0.173678 | -5.44363 | 5.22E-08 | 3.46E-06 |
| SEMA4B       | 567.1381 | -1.19957 | 0.220512 | -5.43992 | 5.33E-08 | 3.52E-06 |
| EGLN1        | 2267.904 | -0.69827 | 0.128518 | -5.43324 | 5.53E-08 | 3.64E-06 |
| LDHB         | 13073.54 | 0.56985  | 0.104926 | 5.430951 | 5.61E-08 | 3.65E-06 |
| PXDN         | 3942.433 | -0.73189 | 0.134775 | -5.43045 | 5.62E-08 | 3.65E-06 |
| CTPS1        | 2419.762 | 0.839909 | 0.154669 | 5.430376 | 5.62E-08 | 3.65E-06 |
| DTL          | 2092.301 | 0.770959 | 0.142261 | 5.419336 | 5.98E-08 | 3.86E-06 |
| C1QTNF1      | 90.43299 | -1.49201 | 0.275701 | -5.41169 | 6.24E-08 | 4.02E-06 |
| TRPM2        | 66.59512 | -1.65652 | 0.306763 | -5.4     | 6.66E-08 | 4.27E-06 |
| DDX20        | 879.8137 | 0.697551 | 0.129427 | 5.389539 | 7.06E-08 | 4.51E-06 |
| CERCAM       | 976.6064 | -1.36096 | 0.25386  | -5.36105 | 8.27E-08 | 5.26E-06 |
| SLC15A4      | 1045.794 | -0.66869 | 0.124834 | -5.35664 | 8.48E-08 | 5.36E-06 |
| IER5         | 513.7023 | 0.801623 | 0.149884 | 5.348303 | 8.88E-08 | 5.59E-06 |
| CTSB         | 10801.34 | -0.72643 | 0.136086 | -5.33805 | 9.40E-08 | 5.88E-06 |
| CCT5         | 9552.853 | 0.601051 | 0.112603 | 5.337805 | 9.41E-08 | 5.88E-06 |
| SPANXA1      | 420.6603 | -1.01819 | 0.19078  | -5.33697 | 9.45E-08 | 5.88E-06 |
| NDUFAF4      | 229.3103 | 0.955177 | 0.179201 | 5.330195 | 9.81E-08 | 6.08E-06 |
| LAMA4        | 5125.656 | -0.64682 | 0.121418 | -5.32722 | 9.97E-08 | 6.16E-06 |
| PLXNB3       | 235.066  | -1.15876 | 0.217743 | -5.32168 | 1.03E-07 | 6.32E-06 |
| PTPRH        | 199.5005 | -1.06388 | 0.200007 | -5.3192  | 1.04E-07 | 6.38E-06 |
| PLA2G16      | 266.9435 | -0.98373 | 0.185124 | -5.31392 | 1.07E-07 | 6.55E-06 |
| PRSS23       | 19127.65 | -0.56868 | 0.107324 | -5.29876 | 1.17E-07 | 7.09E-06 |

|           |          |          |          |          |          |          |
|-----------|----------|----------|----------|----------|----------|----------|
| PKD1L2    | 89.93907 | -1.25525 | 0.237154 | -5.29296 | 1.20E-07 | 7.29E-06 |
| ANG       | 41.32263 | -2.01713 | 0.381302 | -5.29012 | 1.22E-07 | 7.37E-06 |
| L1CAM     | 1814.153 | -0.96144 | 0.181764 | -5.28952 | 1.23E-07 | 7.37E-06 |
| HSPH1     | 4665.711 | 0.865963 | 0.163789 | 5.287077 | 1.24E-07 | 7.44E-06 |
| ARL10     | 61.98383 | -1.73199 | 0.327986 | -5.28069 | 1.29E-07 | 7.67E-06 |
| ZFAND5    | 6311.246 | 0.563584 | 0.10676  | 5.278977 | 1.30E-07 | 7.71E-06 |
| RFX5      | 1450.598 | 0.585096 | 0.110884 | 5.276658 | 1.32E-07 | 7.78E-06 |
| olfml2a   | 505.9162 | -0.79517 | 0.150991 | -5.26637 | 1.39E-07 | 8.20E-06 |
| AFDN-AS1  | 24.41915 | -2.71314 | 0.515609 | -5.26201 | 1.42E-07 | 8.36E-06 |
| DNAJA1    | 4438.737 | 0.614367 | 0.116882 | 5.256318 | 1.47E-07 | 8.59E-06 |
| PPP2R5B   | 438.3472 | -0.90642 | 0.172506 | -5.2544  | 1.49E-07 | 8.65E-06 |
| DNAJC9    | 774.6746 | 0.66513  | 0.127013 | 5.236725 | 1.63E-07 | 9.49E-06 |
| CITED2    | 1517.536 | -0.67168 | 0.128288 | -5.23574 | 1.64E-07 | 9.50E-06 |
| CREB3L1   | 239.7482 | -1.05445 | 0.202612 | -5.20426 | 1.95E-07 | 1.12E-05 |
| SH3PXD2A  | 760.3418 | -0.76389 | 0.146839 | -5.20223 | 1.97E-07 | 1.13E-05 |
| HEMK1     | 823.2291 | -0.80201 | 0.154201 | -5.20107 | 1.98E-07 | 1.13E-05 |
| ESCO2     | 1025.033 | 0.862836 | 0.165935 | 5.19985  | 1.99E-07 | 1.14E-05 |
| SLC16A3   | 2139.339 | -1.28998 | 0.249133 | -5.17789 | 2.24E-07 | 1.27E-05 |
| MXRA7     | 3661.613 | -0.59838 | 0.115579 | -5.17727 | 2.25E-07 | 1.27E-05 |
| TRMT10C   | 535.5218 | 0.726907 | 0.14054  | 5.172232 | 2.31E-07 | 1.29E-05 |
| PRMT3     | 1064.353 | 0.770658 | 0.149005 | 5.172026 | 2.32E-07 | 1.29E-05 |
| TBC1D2    | 918.3916 | -0.87227 | 0.168668 | -5.17149 | 2.32E-07 | 1.29E-05 |
| PTPRB     | 165.3668 | -1.12554 | 0.217645 | -5.17147 | 2.32E-07 | 1.29E-05 |
| SYTL5     | 96.22673 | -1.52911 | 0.29606  | -5.16486 | 2.41E-07 | 1.34E-05 |
| ANXA8L1   | 202.0421 | -0.92838 | 0.180198 | -5.15197 | 2.58E-07 | 1.43E-05 |
| BAMBI     | 3218.391 | -0.69158 | 0.134253 | -5.15132 | 2.59E-07 | 1.43E-05 |
| PBK       | 1848.373 | 0.722676 | 0.140428 | 5.146232 | 2.66E-07 | 1.46E-05 |
| HNRNPAB   | 3038.272 | 0.58556  | 0.114192 | 5.127828 | 2.93E-07 | 1.60E-05 |
| IL32      | 112.7533 | -1.18648 | 0.231468 | -5.12589 | 2.96E-07 | 1.61E-05 |
| ITGA3     | 4342.717 | -0.83215 | 0.162355 | -5.12548 | 2.97E-07 | 1.61E-05 |
| TTYH3     | 1169.134 | -0.9836  | 0.192324 | -5.11428 | 3.15E-07 | 1.71E-05 |
| hspe1     | 1665.885 | 0.684127 | 0.133802 | 5.112985 | 3.17E-07 | 1.71E-05 |
| LOC692247 | 91.84083 | -1.45399 | 0.284961 | -5.1024  | 3.35E-07 | 1.80E-05 |
| ALKBH5    | 3478.007 | -0.76017 | 0.149161 | -5.09631 | 3.46E-07 | 1.86E-05 |
| CSPG4     | 78.89124 | -1.32863 | 0.260792 | -5.0946  | 3.49E-07 | 1.87E-05 |
| HCFC1R1   | 816.1019 | -1.09424 | 0.214903 | -5.0918  | 3.55E-07 | 1.89E-05 |
| BAZ1A     | 1361.233 | 0.676948 | 0.133092 | 5.086324 | 3.65E-07 | 1.93E-05 |
| DHX9      | 5947.319 | 0.678591 | 0.133423 | 5.085999 | 3.66E-07 | 1.93E-05 |
| PNO1      | 583.881  | 0.706961 | 0.139157 | 5.080326 | 3.77E-07 | 1.99E-05 |
| BLCAP     | 1565.664 | -0.6145  | 0.121178 | -5.07104 | 3.96E-07 | 2.08E-05 |
| BET1L     | 1415.523 | -0.95275 | 0.188253 | -5.061   | 4.17E-07 | 2.18E-05 |
| PRIM1     | 607.3454 | 0.867387 | 0.171393 | 5.060805 | 4.17E-07 | 2.18E-05 |
| DNAH5     | 1538.907 | -0.66319 | 0.131351 | -5.049   | 4.44E-07 | 2.31E-05 |
| TPBG      | 557.7029 | -0.87519 | 0.173421 | -5.04662 | 4.50E-07 | 2.33E-05 |
| CACYBP    | 1915.875 | 0.666583 | 0.132238 | 5.040777 | 4.64E-07 | 2.39E-05 |
| GINS2     | 603.2847 | 0.789599 | 0.156649 | 5.040578 | 4.64E-07 | 2.39E-05 |
| COL13A1   | 116.6112 | -1.07951 | 0.21428  | -5.03784 | 4.71E-07 | 2.41E-05 |
| MICAL2    | 1381.016 | -0.57178 | 0.113652 | -5.03096 | 4.88E-07 | 2.49E-05 |
| HMGB1     | 9584.834 | 0.56804  | 0.1136   | 5.000337 | 5.72E-07 | 2.92E-05 |
| nckipsd   | 456.2433 | -1.02836 | 0.206162 | -4.98812 | 6.10E-07 | 3.10E-05 |

|           |          |          |          |          |          |          |
|-----------|----------|----------|----------|----------|----------|----------|
| RNF165    | 236.6836 | -0.80408 | 0.161387 | -4.98234 | 6.28E-07 | 3.18E-05 |
| ADARB1    | 920.5156 | -0.89351 | 0.179408 | -4.98034 | 6.35E-07 | 3.20E-05 |
| WDR77     | 1044.19  | 0.595666 | 0.119639 | 4.978865 | 6.40E-07 | 3.22E-05 |
| PDIA6     | 6477.248 | -0.53457 | 0.107381 | -4.97829 | 6.41E-07 | 3.22E-05 |
| VRK1      | 707.7021 | 0.671449 | 0.135063 | 4.971357 | 6.65E-07 | 3.32E-05 |
| KDM6B     | 216.2727 | -0.87517 | 0.176109 | -4.96947 | 6.71E-07 | 3.34E-05 |
| NR1D1     | 247.141  | -0.93183 | 0.187782 | -4.96228 | 6.97E-07 | 3.46E-05 |
| TIMP3     | 18197.28 | -0.5876  | 0.118529 | -4.9574  | 7.14E-07 | 3.53E-05 |
| MCM8      | 2839.051 | 0.714733 | 0.144342 | 4.951658 | 7.36E-07 | 3.62E-05 |
| SEC14L2   | 1041.12  | -0.68829 | 0.139009 | -4.9514  | 7.37E-07 | 3.62E-05 |
| FAM160A1  | 354.5744 | -0.77594 | 0.156919 | -4.94486 | 7.62E-07 | 3.73E-05 |
| CCNL1     | 2593.827 | 0.690908 | 0.139862 | 4.939926 | 7.82E-07 | 3.82E-05 |
| AKIRIN1   | 1265.135 | 0.589515 | 0.119451 | 4.935187 | 8.01E-07 | 3.90E-05 |
| CDC6      | 1593.919 | 0.7968   | 0.161603 | 4.930609 | 8.20E-07 | 3.98E-05 |
| AMPD3     | 407.7048 | -0.68313 | 0.13859  | -4.92918 | 8.26E-07 | 4.00E-05 |
| SUSD2     | 844.6036 | -1.19063 | 0.241628 | -4.92754 | 8.33E-07 | 4.02E-05 |
| ACE       | 119.3186 | -1.2275  | 0.249337 | -4.92307 | 8.52E-07 | 4.10E-05 |
| TRIO      | 9611.416 | -0.49193 | 0.100095 | -4.91461 | 8.90E-07 | 4.26E-05 |
| PNPT1     | 1504.912 | 0.745288 | 0.151732 | 4.91186  | 9.02E-07 | 4.31E-05 |
| UNG       | 1027.105 | 0.579814 | 0.118099 | 4.909559 | 9.13E-07 | 4.35E-05 |
| F11R      | 231.1319 | -0.85183 | 0.173608 | -4.90662 | 9.27E-07 | 4.40E-05 |
| LOC284561 | 90.20389 | 1.593347 | 0.324772 | 4.906049 | 9.29E-07 | 4.40E-05 |
| RAC2      | 587.4665 | -0.71113 | 0.145131 | -4.89988 | 9.59E-07 | 4.53E-05 |
| LGALS1    | 9033.484 | -0.97838 | 0.199824 | -4.8962  | 9.77E-07 | 4.60E-05 |
| BLM       | 1085.069 | 0.898194 | 0.184128 | 4.878093 | 1.07E-06 | 5.03E-05 |
| PNN       | 2217.124 | 0.622697 | 0.127851 | 4.870479 | 1.11E-06 | 5.21E-05 |
| CTAGE6    | 38.1471  | -1.9259  | 0.395684 | -4.86728 | 1.13E-06 | 5.28E-05 |
| DARS      | 3575.344 | -0.5726  | 0.117864 | -4.85817 | 1.18E-06 | 5.51E-05 |
| PTRF      | 6079.863 | -0.7253  | 0.149404 | -4.85463 | 1.21E-06 | 5.59E-05 |
| FARP1     | 2520.175 | -0.51027 | 0.105189 | -4.85103 | 1.23E-06 | 5.68E-05 |
| PDGFRL    | 58.2079  | -1.43916 | 0.296743 | -4.84985 | 1.24E-06 | 5.69E-05 |
| SERPINE1  | 252.5252 | -0.86486 | 0.17837  | -4.84866 | 1.24E-06 | 5.70E-05 |
| HRH1      | 655.2746 | -0.60863 | 0.125528 | -4.84854 | 1.24E-06 | 5.70E-05 |
| NEK6      | 2522.85  | -0.5925  | 0.12234  | -4.84304 | 1.28E-06 | 5.84E-05 |
| IFITM10   | 842.4471 | -1.09708 | 0.226657 | -4.84027 | 1.30E-06 | 5.90E-05 |
| CCT6A     | 7045.031 | 0.619087 | 0.127945 | 4.838686 | 1.31E-06 | 5.93E-05 |
| POLA1     | 1603.506 | 0.757618 | 0.156612 | 4.837541 | 1.31E-06 | 5.95E-05 |
| ESYT2     | 7538.637 | -0.50941 | 0.105412 | -4.83256 | 1.35E-06 | 6.08E-05 |
| PLEKHA6   | 1386.412 | -0.93816 | 0.194202 | -4.83082 | 1.36E-06 | 6.12E-05 |
| SLC7A2    | 651.9876 | 0.692198 | 0.143405 | 4.826885 | 1.39E-06 | 6.22E-05 |
| PSMG1     | 1001.864 | 0.700472 | 0.145815 | 4.803847 | 1.56E-06 | 6.96E-05 |
| PDK3      | 3398.95  | -0.5582  | 0.116438 | -4.79397 | 1.64E-06 | 7.30E-05 |
| IDS       | 2820.023 | -0.5322  | 0.111056 | -4.7922  | 1.65E-06 | 7.34E-05 |
| THEM4     | 234.9952 | 0.786793 | 0.164245 | 4.790364 | 1.66E-06 | 7.38E-05 |
| RBBP8     | 993.8348 | 0.698662 | 0.146015 | 4.784858 | 1.71E-06 | 7.57E-05 |
| DDIAS     | 562.4455 | 0.888305 | 0.185727 | 4.782867 | 1.73E-06 | 7.62E-05 |
| Tmem91    | 94.03109 | -1.2212  | 0.255439 | -4.7808  | 1.75E-06 | 7.67E-05 |
| SLC9A7    | 410.6554 | -0.79722 | 0.166767 | -4.7804  | 1.75E-06 | 7.67E-05 |
| TWISTNB   | 1367.75  | 0.65195  | 0.1364   | 4.779708 | 1.76E-06 | 7.68E-05 |
| TMED9     | 3121.873 | -0.79865 | 0.167143 | -4.77825 | 1.77E-06 | 7.71E-05 |

|             |          |          |          |          |          |          |
|-------------|----------|----------|----------|----------|----------|----------|
| S100A16     | 856.6981 | -0.73852 | 0.1546   | -4.77698 | 1.78E-06 | 7.74E-05 |
| NEIL3       | 2362.113 | 0.586876 | 0.122939 | 4.773701 | 1.81E-06 | 7.84E-05 |
| TANC2       | 2821.111 | -0.71315 | 0.149441 | -4.77209 | 1.82E-06 | 7.88E-05 |
| ucn2        | 90.14415 | -1.1799  | 0.247408 | -4.76905 | 1.85E-06 | 7.95E-05 |
| ELFN2       | 358.6599 | -0.74254 | 0.155706 | -4.76887 | 1.85E-06 | 7.95E-05 |
| SLA         | 40.24639 | -1.72478 | 0.36168  | -4.76881 | 1.85E-06 | 7.95E-05 |
| SFXN3       | 992.8234 | -0.66073 | 0.138656 | -4.76522 | 1.89E-06 | 8.07E-05 |
| EXOSC8      | 1043.18  | 0.686423 | 0.144076 | 4.764308 | 1.90E-06 | 8.07E-05 |
| PMP22       | 1330.09  | -0.55857 | 0.117248 | -4.76399 | 1.90E-06 | 8.07E-05 |
| SRSF7       | 2754.503 | 0.512673 | 0.107721 | 4.759252 | 1.94E-06 | 8.24E-05 |
| PSME3       | 1633.461 | 0.588409 | 0.123792 | 4.753221 | 2.00E-06 | 8.47E-05 |
| NAMPT       | 7878.546 | 0.779129 | 0.163966 | 4.751781 | 2.02E-06 | 8.50E-05 |
| GPD2        | 3477.235 | 0.542356 | 0.114148 | 4.751322 | 2.02E-06 | 8.50E-05 |
| MRPL47      | 1108.602 | 0.715143 | 0.15068  | 4.746105 | 2.07E-06 | 8.69E-05 |
| GXYLT2      | 882.7742 | -0.61012 | 0.128562 | -4.74574 | 2.08E-06 | 8.69E-05 |
| adamts1     | 1077.846 | 0.567912 | 0.119696 | 4.744606 | 2.09E-06 | 8.72E-05 |
| SLC2A1-AS1  | 245.4701 | -0.90761 | 0.191375 | -4.74256 | 2.11E-06 | 8.78E-05 |
| creld1      | 543.7794 | -1.05209 | 0.22197  | -4.73979 | 2.14E-06 | 8.88E-05 |
| DPCD        | 374.2056 | -0.72067 | 0.152127 | -4.73728 | 2.17E-06 | 8.96E-05 |
| KDM4C       | 894.216  | -0.62371 | 0.131694 | -4.73607 | 2.18E-06 | 8.99E-05 |
| XRCC2       | 777.5377 | 0.805818 | 0.17042  | 4.728418 | 2.26E-06 | 9.31E-05 |
| ALS2CL      | 129.725  | -1.26343 | 0.26745  | -4.72398 | 2.31E-06 | 9.47E-05 |
| C1QBP       | 2555.133 | 0.572709 | 0.121246 | 4.723516 | 2.32E-06 | 9.47E-05 |
| HSD3BP4     | 65.10252 | -1.34864 | 0.285749 | -4.71967 | 2.36E-06 | 9.60E-05 |
| ASNS        | 2524.259 | 0.955662 | 0.20249  | 4.719545 | 2.36E-06 | 9.60E-05 |
| NCL         | 12364.94 | 0.466317 | 0.098994 | 4.710547 | 2.47E-06 | 0.0001   |
| KPNA2       | 8139.075 | 0.586748 | 0.124731 | 4.704123 | 2.55E-06 | 0.000103 |
| LYPD6       | 293.2479 | 0.848537 | 0.180718 | 4.695378 | 2.66E-06 | 0.000107 |
| AIFM1       | 1274.634 | 0.546611 | 0.116576 | 4.688886 | 2.75E-06 | 0.00011  |
| RBL1        | 1039.713 | 0.721863 | 0.154121 | 4.683724 | 2.82E-06 | 0.000113 |
| ATAD2       | 6168.357 | 0.667786 | 0.142588 | 4.683315 | 2.82E-06 | 0.000113 |
| TBC1D3F     | 487.389  | -0.70175 | 0.150005 | -4.67815 | 2.89E-06 | 0.000115 |
| PPP1R13L    | 107.5992 | -1.16429 | 0.249052 | -4.67488 | 2.94E-06 | 0.000117 |
| NR2F2-AS1   | 60.13217 | -1.49481 | 0.320022 | -4.67095 | 3.00E-06 | 0.000119 |
| CCNG2       | 1083.716 | -0.63904 | 0.136868 | -4.66904 | 3.03E-06 | 0.00012  |
| MIS18A      | 659.581  | 0.617301 | 0.132266 | 4.667111 | 3.05E-06 | 0.00012  |
| SNRPD1      | 1036.657 | 0.676358 | 0.144923 | 4.667001 | 3.06E-06 | 0.00012  |
| HSPA4       | 6388.567 | 0.59885  | 0.128325 | 4.666648 | 3.06E-06 | 0.00012  |
| KDM4B       | 528.0838 | -1.03691 | 0.222676 | -4.65659 | 3.21E-06 | 0.000126 |
| USP1        | 3167.17  | 0.649761 | 0.13969  | 4.651435 | 3.30E-06 | 0.000129 |
| ME2         | 977.3506 | 0.673818 | 0.144894 | 4.65041  | 3.31E-06 | 0.000129 |
| WDR27       | 601.0413 | -0.67258 | 0.14467  | -4.64908 | 3.33E-06 | 0.00013  |
| H3F3B       | 8940.676 | 0.482505 | 0.103797 | 4.64857  | 3.34E-06 | 0.00013  |
| ADAMTS9-AS2 | 40.92121 | -1.79093 | 0.386083 | -4.63873 | 3.51E-06 | 0.000135 |
| FEN1        | 1734.044 | 0.622321 | 0.134161 | 4.638598 | 3.51E-06 | 0.000135 |
| SRSF6       | 4835.01  | 0.53682  | 0.115886 | 4.632319 | 3.62E-06 | 0.000139 |
| NMI         | 159.1007 | 0.858399 | 0.185411 | 4.629712 | 3.66E-06 | 0.000141 |
| PTN         | 770.4855 | -0.73104 | 0.157962 | -4.62792 | 3.69E-06 | 0.000141 |
| PTPN22      | 34.21963 | 1.721924 | 0.372676 | 4.620427 | 3.83E-06 | 0.000146 |
| C5          | 582.3693 | 0.659106 | 0.143008 | 4.608864 | 4.05E-06 | 0.000154 |



|          |          |          |          |          |          |          |
|----------|----------|----------|----------|----------|----------|----------|
| SLC35E1  | 1588.492 | -0.59744 | 0.129738 | -4.60497 | 4.13E-06 | 0.000157 |
| CSE1L    | 8516.429 | 0.664581 | 0.14462  | 4.59536  | 4.32E-06 | 0.000164 |
| BCL2     | 123.8175 | 1.005552 | 0.218842 | 4.594884 | 4.33E-06 | 0.000164 |
| TNXB     | 116.4953 | -1.32445 | 0.288315 | -4.59378 | 4.35E-06 | 0.000164 |
| CCNE1    | 244.2311 | 0.728109 | 0.15859  | 4.59114  | 4.41E-06 | 0.000166 |
| CEP78    | 600.4745 | 0.68181  | 0.148775 | 4.582837 | 4.59E-06 | 0.000172 |
| CCDC77   | 1082.023 | 0.566474 | 0.123639 | 4.581686 | 4.61E-06 | 0.000173 |
| DDX52    | 1581.712 | 0.569109 | 0.124255 | 4.580181 | 4.65E-06 | 0.000173 |
| NCAPD3   | 3054.847 | 0.55256  | 0.12065  | 4.579857 | 4.65E-06 | 0.000173 |
| HSPA5    | 8616.822 | -0.71809 | 0.157039 | -4.57267 | 4.82E-06 | 0.000179 |
| FOSB     | 67.2697  | 1.905692 | 0.416993 | 4.570082 | 4.88E-06 | 0.000181 |
| SRSF3    | 5762.315 | 0.610597 | 0.133627 | 4.56942  | 4.89E-06 | 0.000181 |
| CDC7     | 859.6008 | 0.789045 | 0.17282  | 4.565708 | 4.98E-06 | 0.000184 |
| GINS3    | 375.8762 | 0.89911  | 0.197096 | 4.561792 | 5.07E-06 | 0.000187 |
| MELK     | 2006.291 | 0.645094 | 0.141476 | 4.559756 | 5.12E-06 | 0.000188 |
| LIF      | 807.6169 | -0.72143 | 0.158285 | -4.55783 | 5.17E-06 | 0.00019  |
| PGAM1    | 9257.418 | -0.54068 | 0.118707 | -4.55474 | 5.25E-06 | 0.000192 |
| HSPA9    | 11089.71 | 0.526688 | 0.115773 | 4.549326 | 5.38E-06 | 0.000196 |
| SLBP     | 1447.455 | 0.502377 | 0.110432 | 4.54918  | 5.39E-06 | 0.000196 |
| ZNF70    | 463.4499 | -0.62804 | 0.13812  | -4.54708 | 5.44E-06 | 0.000198 |
| TNIP1    | 2267.788 | -0.8013  | 0.176288 | -4.5454  | 5.48E-06 | 0.000199 |
| PER1     | 310.9666 | -0.94201 | 0.207399 | -4.54202 | 5.57E-06 | 0.000201 |
| GMNN     | 794.1303 | 0.687533 | 0.151539 | 4.536993 | 5.71E-06 | 0.000206 |
| E2F3     | 977.9507 | 0.580014 | 0.127856 | 4.536476 | 5.72E-06 | 0.000206 |
| RFC4     | 1375.136 | 0.606945 | 0.133817 | 4.535633 | 5.74E-06 | 0.000206 |
| CLEC2B   | 1098.759 | -0.6582  | 0.145142 | -4.53486 | 5.76E-06 | 0.000206 |
| RWDD2B   | 549.8174 | 0.631746 | 0.139321 | 4.534466 | 5.77E-06 | 0.000206 |
| EIF5     | 3131.432 | 0.637464 | 0.140584 | 4.534407 | 5.78E-06 | 0.000206 |
| UTP15    | 1005.264 | 0.645369 | 0.14234  | 4.53401  | 5.79E-06 | 0.000206 |
| BSG      | 3518.297 | -1.13803 | 0.251066 | -4.53282 | 5.82E-06 | 0.000207 |
| TTL      | 1646.663 | 0.624558 | 0.137873 | 4.529957 | 5.90E-06 | 0.000209 |
| PHF21A   | 738.8578 | -0.55026 | 0.121577 | -4.526   | 6.01E-06 | 0.000212 |
| HSPG2    | 2196.217 | -1.10919 | 0.245077 | -4.52587 | 6.01E-06 | 0.000212 |
| POLR3D   | 916.2608 | -0.67816 | 0.149862 | -4.52524 | 6.03E-06 | 0.000212 |
| FOSL2    | 2228.563 | -0.7026  | 0.155469 | -4.51923 | 6.21E-06 | 0.000218 |
| DNHD1    | 1122.262 | -0.54919 | 0.121555 | -4.51807 | 6.24E-06 | 0.000218 |
| SNORD83A | 47.69684 | 1.461059 | 0.323418 | 4.517555 | 6.26E-06 | 0.000218 |
| ARFGAP1  | 1582.58  | -0.99967 | 0.221341 | -4.51643 | 6.29E-06 | 0.000219 |
| STARD7   | 5427.193 | 0.471    | 0.104382 | 4.512253 | 6.41E-06 | 0.000223 |
| EZH2     | 1535.623 | 0.666656 | 0.147904 | 4.507357 | 6.56E-06 | 0.000228 |
| CRELD2   | 716.3296 | -0.82975 | 0.184274 | -4.50282 | 6.71E-06 | 0.000232 |
| RFK      | 386.6413 | 0.706749 | 0.156983 | 4.502064 | 6.73E-06 | 0.000232 |
| CDH6     | 7739.687 | -0.64469 | 0.143283 | -4.49942 | 6.81E-06 | 0.000235 |
| COL1A1   | 33.23584 | -1.82558 | 0.405845 | -4.49822 | 6.85E-06 | 0.000235 |
| WDHD1    | 1166.715 | 0.663814 | 0.147575 | 4.498137 | 6.86E-06 | 0.000235 |
| AP1AR    | 409.8483 | 0.673742 | 0.149925 | 4.493848 | 6.99E-06 | 0.000239 |
| AXIN2    | 115.0192 | 0.930537 | 0.207296 | 4.488926 | 7.16E-06 | 0.000244 |
| RAD54B   | 694.1189 | 0.847843 | 0.189049 | 4.484767 | 7.30E-06 | 0.000249 |
| AKAP12   | 187.5437 | -0.93237 | 0.207925 | -4.48417 | 7.32E-06 | 0.000249 |
| RRS1     | 205.3103 | 0.768418 | 0.171411 | 4.482895 | 7.36E-06 | 0.00025  |

|          |          |          |          |          |          |          |
|----------|----------|----------|----------|----------|----------|----------|
| FKBP5    | 893.8275 | 0.683288 | 0.152494 | 4.480766 | 7.44E-06 | 0.000252 |
| PPIB     | 3102.203 | -0.54821 | 0.122395 | -4.47906 | 7.50E-06 | 0.000253 |
| c4orf46  | 755.1967 | 0.609629 | 0.136141 | 4.477921 | 7.54E-06 | 0.000254 |
| FAM20C   | 5014.54  | -0.80409 | 0.179701 | -4.47458 | 7.66E-06 | 0.000257 |
| FLNC     | 1365.111 | -1.04591 | 0.233772 | -4.47407 | 7.67E-06 | 0.000258 |
| TBC1D3   | 566.156  | -0.67723 | 0.151385 | -4.47355 | 7.69E-06 | 0.000258 |
| URB2     | 611.7297 | 0.619194 | 0.138498 | 4.470776 | 7.79E-06 | 0.00026  |
| GANAB    | 17117.26 | -0.53782 | 0.120401 | -4.46689 | 7.94E-06 | 0.000265 |
| HSP90B1  | 32172.92 | -0.61346 | 0.137465 | -4.46267 | 8.09E-06 | 0.000269 |
| GINS1    | 1662.054 | 0.57823  | 0.129757 | 4.456244 | 8.34E-06 | 0.000277 |
| EDARADD  | 1374.788 | -0.55649 | 0.125172 | -4.44577 | 8.76E-06 | 0.000289 |
| NDUFAF5  | 534.5568 | 0.605206 | 0.136192 | 4.443767 | 8.84E-06 | 0.000292 |
| RPTOR    | 1266.409 | -0.82258 | 0.185334 | -4.4384  | 9.06E-06 | 0.000298 |
| PDSS1    | 164.4121 | 0.865597 | 0.195092 | 4.436864 | 9.13E-06 | 0.000299 |
| ORC6     | 705.1521 | 0.658185 | 0.148346 | 4.436823 | 9.13E-06 | 0.000299 |
| TFAM     | 985.5704 | 0.635265 | 0.14318  | 4.43682  | 9.13E-06 | 0.000299 |
| RNF157   | 103.1491 | 1.001328 | 0.225781 | 4.43496  | 9.21E-06 | 0.000301 |
| TPRKB    | 463.5785 | 0.790751 | 0.178405 | 4.432336 | 9.32E-06 | 0.000303 |
| IFRD1    | 2684.869 | 0.548818 | 0.123829 | 4.432052 | 9.33E-06 | 0.000303 |
| POLA2    | 950.5683 | 0.568322 | 0.12824  | 4.431719 | 9.35E-06 | 0.000303 |
| CMSS1    | 848.649  | 0.565967 | 0.127818 | 4.427902 | 9.52E-06 | 0.000308 |
| TCP1     | 4525.464 | 0.514482 | 0.116199 | 4.427578 | 9.53E-06 | 0.000308 |
| LIN9     | 607.3986 | 0.749347 | 0.169345 | 4.424967 | 9.65E-06 | 0.000311 |
| CSMD2    | 61.59824 | -1.33672 | 0.302246 | -4.42261 | 9.75E-06 | 0.000314 |
| DKK3     | 5259.255 | -0.45346 | 0.102573 | -4.42086 | 9.83E-06 | 0.000316 |
| EIF2B3   | 1262.196 | 0.542045 | 0.122643 | 4.419707 | 9.88E-06 | 0.000317 |
| SCN3A    | 408.4202 | -0.76428 | 0.173112 | -4.41497 | 1.01E-05 | 0.000323 |
| CDH15    | 53.85596 | -1.30594 | 0.295903 | -4.41339 | 1.02E-05 | 0.000325 |
| KLF6     | 1684.197 | 0.497802 | 0.113009 | 4.404974 | 1.06E-05 | 0.000337 |
| OXCT1    | 976.0887 | 0.744502 | 0.169065 | 4.403632 | 1.06E-05 | 0.000338 |
| NOP58    | 1814.955 | 0.582853 | 0.132535 | 4.397738 | 1.09E-05 | 0.000347 |
| BCKDK    | 699.6941 | -0.9022  | 0.205258 | -4.39544 | 1.11E-05 | 0.000349 |
| ADAM8    | 39.98605 | -1.70457 | 0.387823 | -4.39522 | 1.11E-05 | 0.000349 |
| SCLY     | 206.4235 | 0.849927 | 0.19344  | 4.393753 | 1.11E-05 | 0.000351 |
| PDLIM2   | 280.6158 | -1.16687 | 0.265634 | -4.39278 | 1.12E-05 | 0.000351 |
| WSB1     | 5146.706 | -0.64977 | 0.147926 | -4.39257 | 1.12E-05 | 0.000351 |
| cyb5r3   | 1618.707 | -0.80865 | 0.184123 | -4.39187 | 1.12E-05 | 0.000352 |
| vsig10   | 531.0818 | 0.591811 | 0.134863 | 4.388239 | 1.14E-05 | 0.000356 |
| LMNB1    | 5072.943 | 0.531103 | 0.12103  | 4.388205 | 1.14E-05 | 0.000356 |
| MCM6     | 1672.669 | 0.68401  | 0.155954 | 4.385987 | 1.15E-05 | 0.000359 |
| SNHG18   | 604.6333 | -0.73098 | 0.166664 | -4.38595 | 1.15E-05 | 0.000359 |
| TMEM19   | 669.0629 | 0.714285 | 0.16287  | 4.385613 | 1.16E-05 | 0.000359 |
| ADAMTS2  | 1159.918 | -0.6905  | 0.15756  | -4.38244 | 1.17E-05 | 0.000363 |
| LYAR     | 383.6739 | 0.666255 | 0.15212  | 4.379805 | 1.19E-05 | 0.000366 |
| MIR612   | 823.6551 | -0.92988 | 0.212312 | -4.37976 | 1.19E-05 | 0.000366 |
| PHTF2    | 2372.678 | 0.542239 | 0.123831 | 4.378876 | 1.19E-05 | 0.000367 |
| CACHD1   | 184.1777 | 0.746028 | 0.170407 | 4.377909 | 1.20E-05 | 0.000368 |
| SLC25A13 | 1650.363 | 0.582728 | 0.133169 | 4.375855 | 1.21E-05 | 0.00037  |
| KIAA1551 | 2065.285 | 0.604334 | 0.138191 | 4.373193 | 1.22E-05 | 0.000374 |
| UBLCP1   | 1187.183 | 0.643271 | 0.147184 | 4.370522 | 1.24E-05 | 0.000378 |

|           |          |          |          |          |          |          |
|-----------|----------|----------|----------|----------|----------|----------|
| E2F6      | 415.0482 | 0.672164 | 0.153819 | 4.369842 | 1.24E-05 | 0.000379 |
| SYVN1     | 676.2711 | -0.90702 | 0.207583 | -4.36943 | 1.25E-05 | 0.000379 |
| YIPF2     | 369.3395 | -1.14929 | 0.263245 | -4.36584 | 1.27E-05 | 0.000384 |
| MOB3A     | 408.0526 | -0.85869 | 0.196704 | -4.36536 | 1.27E-05 | 0.000384 |
| COL27A1   | 382.5594 | -0.83131 | 0.190557 | -4.36251 | 1.29E-05 | 0.000387 |
| MSH2      | 1636.841 | 0.686923 | 0.157465 | 4.362382 | 1.29E-05 | 0.000387 |
| TLR4      | 626.1234 | 0.651504 | 0.149348 | 4.362329 | 1.29E-05 | 0.000387 |
| MIR21     | 157.5361 | 0.942655 | 0.216257 | 4.358952 | 1.31E-05 | 0.000392 |
| ENPP2     | 232.5724 | 0.73419  | 0.168759 | 4.350514 | 1.36E-05 | 0.000407 |
| COPS3     | 1871.554 | 0.565374 | 0.130006 | 4.348831 | 1.37E-05 | 0.000409 |
| RFWD3     | 2750.607 | 0.515312 | 0.118509 | 4.348304 | 1.37E-05 | 0.000409 |
| NCKAP5    | 273.901  | -0.70966 | 0.163222 | -4.34785 | 1.37E-05 | 0.000409 |
| TRIM2     | 900.4993 | 0.526453 | 0.121089 | 4.347666 | 1.38E-05 | 0.000409 |
| SLIRP     | 552.5996 | 0.629582 | 0.144855 | 4.3463   | 1.38E-05 | 0.00041  |
| MYADM     | 715.0736 | -0.60187 | 0.138479 | -4.34626 | 1.38E-05 | 0.00041  |
| PPM1D     | 367.8828 | 0.673666 | 0.155071 | 4.344247 | 1.40E-05 | 0.000413 |
| magoh     | 492.946  | 0.572842 | 0.131882 | 4.343584 | 1.40E-05 | 0.000414 |
| SERINC2   | 172.7783 | -1.1107  | 0.255839 | -4.3414  | 1.42E-05 | 0.000417 |
| GOLGA3    | 4558.293 | -0.6983  | 0.160884 | -4.34038 | 1.42E-05 | 0.000418 |
| ANAPC7    | 1143.883 | 0.550988 | 0.126953 | 4.340111 | 1.42E-05 | 0.000418 |
| RNU5B-1   | 32.41905 | 1.68059  | 0.387498 | 4.337026 | 1.44E-05 | 0.000423 |
| FSTL3     | 338.1476 | -0.77965 | 0.179827 | -4.33556 | 1.45E-05 | 0.000425 |
| GPD1L     | 378.0724 | 0.620809 | 0.143252 | 4.333694 | 1.47E-05 | 0.000428 |
| CCT2      | 5071.488 | 0.529059 | 0.1221   | 4.333    | 1.47E-05 | 0.000428 |
| FGF11     | 32.80289 | -1.67444 | 0.386472 | -4.33264 | 1.47E-05 | 0.000428 |
| CBFB      | 3202.159 | 0.505378 | 0.116662 | 4.331972 | 1.48E-05 | 0.000429 |
| LTV1      | 758.1636 | 0.632712 | 0.146078 | 4.331325 | 1.48E-05 | 0.000429 |
| HNRNPA2B1 | 11820.04 | 0.525805 | 0.121436 | 4.329885 | 1.49E-05 | 0.000431 |
| CCDC69    | 304.458  | 0.783443 | 0.180984 | 4.328796 | 1.50E-05 | 0.000433 |
| TMEM38B   | 496.8883 | 0.6239   | 0.144337 | 4.32252  | 1.54E-05 | 0.000444 |
| RASA4B    | 189.3067 | -1.10391 | 0.255412 | -4.3221  | 1.55E-05 | 0.000444 |
| GPR146    | 40.11192 | -1.4267  | 0.330207 | -4.32062 | 1.56E-05 | 0.000446 |
| FANCI     | 3817.234 | 0.630866 | 0.146043 | 4.319734 | 1.56E-05 | 0.000447 |
| KDELR3    | 2583.997 | -0.78118 | 0.180895 | -4.3184  | 1.57E-05 | 0.000449 |
| ITGA5     | 2078.623 | -0.69356 | 0.160716 | -4.31542 | 1.59E-05 | 0.000455 |
| SUSD5     | 319.8774 | 0.652333 | 0.151263 | 4.312566 | 1.61E-05 | 0.00046  |
| Snhg4     | 284.0418 | 0.71584  | 0.166009 | 4.312064 | 1.62E-05 | 0.00046  |
| EEF1E1    | 857.7722 | 0.616613 | 0.143032 | 4.311016 | 1.63E-05 | 0.000461 |
| SMC6      | 1465.223 | 0.623235 | 0.144586 | 4.310472 | 1.63E-05 | 0.000461 |
| NADSYN1   | 938.9424 | -0.8787  | 0.2039   | -4.30945 | 1.64E-05 | 0.000463 |
| DHFR      | 2826.267 | 0.645542 | 0.149821 | 4.308755 | 1.64E-05 | 0.000463 |
| NOL11     | 1782.578 | 0.598396 | 0.138928 | 4.307235 | 1.65E-05 | 0.000466 |
| HMGB3     | 1806.959 | 0.522547 | 0.12138  | 4.305044 | 1.67E-05 | 0.000469 |
| FHL2      | 1312.745 | -0.49839 | 0.115813 | -4.30339 | 1.68E-05 | 0.000472 |
| ADIRF-AS1 | 603.2364 | -0.8465  | 0.196957 | -4.29791 | 1.72E-05 | 0.000483 |
| CENPN     | 1518.278 | 0.586231 | 0.136423 | 4.297154 | 1.73E-05 | 0.000483 |
| meg3      | 33.95978 | -1.65985 | 0.386289 | -4.29692 | 1.73E-05 | 0.000483 |
| TXNDC9    | 1004.775 | 0.596982 | 0.13898  | 4.29545  | 1.74E-05 | 0.000486 |
| HMGCL     | 833.342  | -0.68697 | 0.160027 | -4.29281 | 1.76E-05 | 0.000491 |
| ASNSD1    | 791.067  | 0.625451 | 0.145718 | 4.292202 | 1.77E-05 | 0.000491 |

|           |          |          |          |          |          |          |
|-----------|----------|----------|----------|----------|----------|----------|
| BCL2L11   | 321.2735 | 0.672272 | 0.156674 | 4.290883 | 1.78E-05 | 0.000493 |
| CYP1B1    | 651.3673 | 0.576621 | 0.134417 | 4.289795 | 1.79E-05 | 0.000494 |
| COL8A1    | 1109.898 | -0.5739  | 0.133789 | -4.28959 | 1.79E-05 | 0.000494 |
| polr3g    | 537.3754 | 0.715522 | 0.166961 | 4.285572 | 1.82E-05 | 0.000502 |
| TMPO      | 5366.277 | 0.635284 | 0.14825  | 4.285217 | 1.83E-05 | 0.000502 |
| PAK1IP1   | 727.9656 | 0.695901 | 0.162583 | 4.28029  | 1.87E-05 | 0.000513 |
| MRPL17    | 1164.498 | -0.48519 | 0.113377 | -4.27942 | 1.87E-05 | 0.000514 |
| FAM111A   | 2622.419 | 0.576455 | 0.134731 | 4.278579 | 1.88E-05 | 0.000515 |
| UBE2G1    | 2330.862 | 0.561254 | 0.131205 | 4.277691 | 1.89E-05 | 0.000516 |
| PGM5      | 183.1316 | -0.83032 | 0.194142 | -4.27685 | 1.90E-05 | 0.000517 |
| TARS      | 5865.215 | 0.51203  | 0.119817 | 4.273417 | 1.93E-05 | 0.000524 |
| PACS1     | 1025.969 | -0.5657  | 0.132458 | -4.27079 | 1.95E-05 | 0.000529 |
| THAP12    | 1731.446 | 0.599931 | 0.140532 | 4.269001 | 1.96E-05 | 0.000533 |
| ACTR1B    | 801.8439 | -0.79827 | 0.187059 | -4.26748 | 1.98E-05 | 0.000535 |
| PLOD3     | 2129.092 | -0.91421 | 0.214418 | -4.26371 | 2.01E-05 | 0.000544 |
| nfkbi     | 552.0548 | 0.858263 | 0.20132  | 4.263175 | 2.02E-05 | 0.000544 |
| CBX3      | 7441.843 | 0.474981 | 0.111511 | 4.259493 | 2.05E-05 | 0.000551 |
| BRIX1     | 2585.732 | 0.600416 | 0.140965 | 4.259335 | 2.05E-05 | 0.000551 |
| SH3BP2    | 2678.39  | -0.58275 | 0.137017 | -4.2531  | 2.11E-05 | 0.000566 |
| FKBP10    | 3642.795 | -0.84405 | 0.198913 | -4.24329 | 2.20E-05 | 0.00059  |
| IDH3A     | 1221.453 | 0.570514 | 0.134629 | 4.237679 | 2.26E-05 | 0.000602 |
| EPHA1-AS1 | 34.04119 | -1.67686 | 0.395707 | -4.23764 | 2.26E-05 | 0.000602 |
| AHSA1     | 1050.562 | 0.480802 | 0.113492 | 4.23645  | 2.27E-05 | 0.000604 |
| DDOST     | 5506.844 | -0.67729 | 0.159899 | -4.23572 | 2.28E-05 | 0.000605 |
| MYO15B    | 46.56972 | -1.3783  | 0.32541  | -4.23557 | 2.28E-05 | 0.000605 |
| ZWILCH    | 1010.639 | 0.731988 | 0.172937 | 4.232696 | 2.31E-05 | 0.000611 |
| TMOD2     | 514.1772 | 0.631982 | 0.149484 | 4.227751 | 2.36E-05 | 0.000624 |
| DENND6A   | 1045.948 | 0.533348 | 0.126173 | 4.227113 | 2.37E-05 | 0.000625 |
| NAT6      | 88.48355 | -1.1648  | 0.275604 | -4.22636 | 2.38E-05 | 0.000626 |
| TMEM123   | 17631.77 | -0.56472 | 0.13386  | -4.21875 | 2.46E-05 | 0.000646 |
| GAS6      | 364.0141 | -0.93744 | 0.222261 | -4.21776 | 2.47E-05 | 0.000648 |
| UBR7      | 659.8517 | 0.59146  | 0.140313 | 4.215283 | 2.49E-05 | 0.000653 |
| GBE1      | 11987.82 | -0.65801 | 0.156107 | -4.21516 | 2.50E-05 | 0.000653 |
| FYTTD1    | 2887.794 | 0.50157  | 0.119046 | 4.213262 | 2.52E-05 | 0.000657 |
| MMS22L    | 1323.186 | 0.696719 | 0.165395 | 4.212453 | 2.53E-05 | 0.000658 |
| TOPORS    | 1129.199 | 0.54778  | 0.130107 | 4.210212 | 2.55E-05 | 0.000663 |
| SPRTN     | 412.8003 | 0.63786  | 0.15154  | 4.209191 | 2.56E-05 | 0.000665 |
| MLLT3     | 165.3698 | -0.87631 | 0.208236 | -4.20823 | 2.57E-05 | 0.000667 |
| SKA2      | 1007.272 | 0.576828 | 0.1371   | 4.207348 | 2.58E-05 | 0.000668 |
| AMT       | 167.2453 | -0.93291 | 0.221838 | -4.20536 | 2.61E-05 | 0.000672 |
| NIPA2     | 1905.977 | 0.510511 | 0.121401 | 4.205176 | 2.61E-05 | 0.000672 |
| RAI14     | 4841.384 | -0.54575 | 0.130012 | -4.19768 | 2.70E-05 | 0.000694 |
| INTS7     | 971.6041 | 0.580236 | 0.138278 | 4.196172 | 2.71E-05 | 0.000697 |
| OS9       | 5684.637 | -0.65735 | 0.156711 | -4.19467 | 2.73E-05 | 0.000701 |
| CLIP1-AS1 | 54.11978 | 1.31394  | 0.313331 | 4.193458 | 2.75E-05 | 0.000703 |
| PFKL      | 2899.755 | -1.13773 | 0.271448 | -4.19135 | 2.77E-05 | 0.000709 |
| CHCHD3    | 1775.964 | 0.581099 | 0.138771 | 4.187465 | 2.82E-05 | 0.00072  |
| IL1RAP    | 1232.342 | -0.63526 | 0.151743 | -4.1864  | 2.83E-05 | 0.000721 |
| FN1       | 12081.67 | 1.018395 | 0.243266 | 4.18634  | 2.83E-05 | 0.000721 |
| SEL1L3    | 950.9192 | 0.645639 | 0.154485 | 4.17931  | 2.92E-05 | 0.000742 |

|          |          |          |          |          |          |          |
|----------|----------|----------|----------|----------|----------|----------|
| LONRF2   | 189.6938 | 0.742885 | 0.177893 | 4.176011 | 2.97E-05 | 0.000751 |
| HSPA14   | 535.4488 | 0.5558   | 0.133095 | 4.175975 | 2.97E-05 | 0.000751 |
| MCM4     | 4792.613 | 0.527086 | 0.126234 | 4.175483 | 2.97E-05 | 0.000751 |
| CDC45    | 703.8402 | 0.600145 | 0.14374  | 4.175227 | 2.98E-05 | 0.000751 |
| TGFA     | 38.10527 | -1.48292 | 0.355342 | -4.17322 | 3.00E-05 | 0.000756 |
| PDXK     | 2963.519 | -0.67438 | 0.161617 | -4.17273 | 3.01E-05 | 0.000757 |
| EXTL2    | 569.8102 | 0.599368 | 0.143727 | 4.170184 | 3.04E-05 | 0.000764 |
| EFEMP2   | 1468.035 | -1.03356 | 0.248027 | -4.16713 | 3.08E-05 | 0.000773 |
| MRPL42   | 1572.417 | 0.557661 | 0.13385  | 4.166316 | 3.10E-05 | 0.000775 |
| PSMA4    | 3701.197 | 0.578308 | 0.138859 | 4.164726 | 3.12E-05 | 0.000779 |
| HNRNPM   | 2247.605 | 0.603378 | 0.14491  | 4.163804 | 3.13E-05 | 0.00078  |
| TRADD    | 340.3045 | -0.72914 | 0.175139 | -4.16321 | 3.14E-05 | 0.00078  |
| LRRCC1   | 393.801  | 0.758377 | 0.182171 | 4.162991 | 3.14E-05 | 0.00078  |
| ENOX2    | 302.8747 | 0.619711 | 0.148863 | 4.162961 | 3.14E-05 | 0.00078  |
| H2AFZ    | 6449.602 | 0.459572 | 0.110427 | 4.161757 | 3.16E-05 | 0.000782 |
| GGCT     | 1176.737 | 0.580885 | 0.139585 | 4.161524 | 3.16E-05 | 0.000782 |
| MAMDC4   | 116.3897 | -1.33591 | 0.321142 | -4.15988 | 3.18E-05 | 0.000785 |
| POGLUT1  | 784.9292 | 0.637733 | 0.153309 | 4.159784 | 3.19E-05 | 0.000785 |
| PSMD1    | 6361.368 | 0.602537 | 0.144855 | 4.159575 | 3.19E-05 | 0.000785 |
| RCN3     | 197.1986 | -1.15288 | 0.277204 | -4.15898 | 3.20E-05 | 0.000786 |
| NCR3LG1  | 224.9052 | 0.757618 | 0.182216 | 4.157793 | 3.21E-05 | 0.000789 |
| MAT2A    | 5849.947 | 0.521667 | 0.125521 | 4.15603  | 3.24E-05 | 0.000793 |
| SLC25A12 | 626.3402 | 0.615595 | 0.148177 | 4.15445  | 3.26E-05 | 0.000798 |
| CRABP2   | 37.9649  | -1.5022  | 0.361885 | -4.15104 | 3.31E-05 | 0.000808 |
| PANX2    | 189.2192 | -0.88384 | 0.213059 | -4.14833 | 3.35E-05 | 0.000817 |
| GRK5     | 377.1527 | -0.639   | 0.154223 | -4.14332 | 3.42E-05 | 0.000833 |
| GOT1     | 1020.582 | 0.49747  | 0.120139 | 4.140786 | 3.46E-05 | 0.000841 |
| Hp1      | 436.2353 | 0.660433 | 0.159717 | 4.135013 | 3.55E-05 | 0.000861 |
| Uqcrfs1  | 1689.958 | 0.511706 | 0.123755 | 4.134832 | 3.55E-05 | 0.000861 |
| STIP1    | 5036.861 | 0.416991 | 0.10087  | 4.133943 | 3.57E-05 | 0.000863 |
| NARS     | 5017.518 | 0.484483 | 0.117265 | 4.131517 | 3.60E-05 | 0.000871 |
| ITPR3    | 3005.562 | -0.71193 | 0.172348 | -4.13079 | 3.62E-05 | 0.000872 |
| CEP76    | 257.9219 | 0.670463 | 0.16232  | 4.130509 | 3.62E-05 | 0.000872 |
| GDAP1    | 224.5303 | 0.833125 | 0.201734 | 4.129822 | 3.63E-05 | 0.000873 |
| SREBF2   | 3437.924 | -0.62459 | 0.151293 | -4.12834 | 3.65E-05 | 0.000877 |
| DCLRE1B  | 454.224  | 0.569442 | 0.138036 | 4.125308 | 3.70E-05 | 0.000887 |
| HSPD1    | 9531.703 | 0.605183 | 0.146834 | 4.121545 | 3.76E-05 | 0.000901 |
| SBF2-AS1 | 292.9802 | -0.8857  | 0.214916 | -4.12114 | 3.77E-05 | 0.000901 |
| RCBTB1   | 1637.245 | 0.478805 | 0.116194 | 4.120747 | 3.78E-05 | 0.000901 |
| E2F2     | 238.3504 | 0.771641 | 0.187474 | 4.115994 | 3.86E-05 | 0.000918 |
| NACAD    | 104.7946 | -1.31737 | 0.320176 | -4.11453 | 3.88E-05 | 0.000923 |
| AASDHPPT | 1919.406 | 0.493688 | 0.120053 | 4.112238 | 3.92E-05 | 0.000931 |
| NSMCE4A  | 334.8864 | 0.625117 | 0.152145 | 4.108682 | 3.98E-05 | 0.000944 |
| CCT3     | 5625.268 | 0.445744 | 0.108637 | 4.103049 | 4.08E-05 | 0.000965 |
| NME1     | 946.0908 | 0.616804 | 0.15047  | 4.099192 | 4.15E-05 | 0.00098  |
| RGCC     | 57.65988 | -1.15603 | 0.282094 | -4.09802 | 4.17E-05 | 0.000984 |
| LTK      | 226.5819 | -0.9458  | 0.230824 | -4.09751 | 4.18E-05 | 0.000984 |
| MMP24    | 257.2253 | -0.85471 | 0.208803 | -4.09336 | 4.25E-05 | 0.001001 |
| man2b2   | 818.5064 | -0.5915  | 0.144551 | -4.09197 | 4.28E-05 | 0.001005 |
| ZWINT    | 1449.285 | 0.55225  | 0.13497  | 4.091648 | 4.28E-05 | 0.001005 |

|            |          |          |          |          |          |          |
|------------|----------|----------|----------|----------|----------|----------|
| MARS2      | 130.3377 | 0.855678 | 0.209202 | 4.090189 | 4.31E-05 | 0.00101  |
| MEGF6      | 137.8506 | -1.05047 | 0.256992 | -4.08754 | 4.36E-05 | 0.00102  |
| CNST       | 1076.652 | 0.508492 | 0.124455 | 4.085754 | 4.39E-05 | 0.001025 |
| OSTM1      | 1311.964 | 0.547964 | 0.134123 | 4.085524 | 4.40E-05 | 0.001025 |
| PHTF1      | 1124.021 | 0.538513 | 0.131817 | 4.085297 | 4.40E-05 | 0.001025 |
| NIP7       | 868.0237 | 0.523233 | 0.128104 | 4.084431 | 4.42E-05 | 0.001027 |
| MRPL23-AS1 | 173.1935 | -1.25507 | 0.30748  | -4.0818  | 4.47E-05 | 0.001037 |
| OSBPL11    | 560.9682 | 0.646512 | 0.158439 | 4.080511 | 4.49E-05 | 0.001042 |
| PSMA3      | 1463.176 | 0.530469 | 0.130063 | 4.078557 | 4.53E-05 | 0.001049 |
| NAALADL2   | 76.49377 | -1.06178 | 0.260759 | -4.07189 | 4.66E-05 | 0.001076 |
| CTDNEP1    | 789.7952 | -0.58869 | 0.14466  | -4.06948 | 4.71E-05 | 0.001086 |
| GNAL       | 103.3022 | 0.861326 | 0.211716 | 4.068311 | 4.74E-05 | 0.001089 |
| SUCLG1     | 1519.13  | 0.476102 | 0.117062 | 4.067094 | 4.76E-05 | 0.001091 |
| RNU5A-1    | 58.44421 | 1.202262 | 0.29561  | 4.067053 | 4.76E-05 | 0.001091 |
| SUV39H2    | 697.601  | 0.609772 | 0.149935 | 4.066922 | 4.76E-05 | 0.001091 |
| HNRNPA1    | 6675.304 | 0.438894 | 0.107927 | 4.066564 | 4.77E-05 | 0.001091 |
| SLC35G1    | 122.396  | 0.874797 | 0.215255 | 4.06401  | 4.82E-05 | 0.001102 |
| TRIM37     | 2090.643 | 0.516182 | 0.127082 | 4.061798 | 4.87E-05 | 0.00111  |
| SZT2       | 2099.517 | -0.67137 | 0.165384 | -4.05947 | 4.92E-05 | 0.00112  |
| SMTN       | 517.4624 | -1.05051 | 0.258956 | -4.05671 | 4.98E-05 | 0.001131 |
| TEX30      | 339.3209 | 0.640302 | 0.157855 | 4.056266 | 4.99E-05 | 0.001131 |
| PKM        | 58549    | -0.60876 | 0.150097 | -4.05579 | 5.00E-05 | 0.001131 |
| GALNT2     | 3560.203 | -0.52047 | 0.128331 | -4.0557  | 5.00E-05 | 0.001131 |
| ECM1       | 1287.878 | -0.74993 | 0.184926 | -4.0553  | 5.01E-05 | 0.001132 |
| sfbmt1     | 648.7294 | 0.551417 | 0.135996 | 4.054654 | 5.02E-05 | 0.001132 |
| MFSD14B    | 1469.618 | 0.457743 | 0.112895 | 4.054601 | 5.02E-05 | 0.001132 |
| AEN        | 498.9594 | 0.633787 | 0.156364 | 4.053286 | 5.05E-05 | 0.001136 |
| ALDH18A1   | 3402.199 | -0.56129 | 0.138531 | -4.05173 | 5.08E-05 | 0.001142 |
| FBLN1      | 298.1271 | -0.87748 | 0.216695 | -4.04936 | 5.14E-05 | 0.001152 |
| NAE1       | 2436.951 | 0.528342 | 0.130621 | 4.044846 | 5.24E-05 | 0.001173 |
| TMED3      | 2153.18  | -0.73006 | 0.180508 | -4.04448 | 5.24E-05 | 0.001173 |
| SLC25A37   | 1878.597 | -0.68993 | 0.170634 | -4.04332 | 5.27E-05 | 0.001177 |
| CUL7       | 2635.298 | -1.00378 | 0.248314 | -4.04237 | 5.29E-05 | 0.00118  |
| SYNGR1     | 185.2251 | -0.79228 | 0.19601  | -4.04203 | 5.30E-05 | 0.00118  |
| AASS       | 1266.609 | 0.481774 | 0.119202 | 4.041649 | 5.31E-05 | 0.001181 |
| RAVER2     | 896.2663 | 0.539717 | 0.133559 | 4.041028 | 5.32E-05 | 0.001182 |
| ZNF175     | 461.8502 | -0.57927 | 0.14337  | -4.04039 | 5.34E-05 | 0.001184 |
| CDC42SE2   | 1490.085 | 0.505091 | 0.125028 | 4.03982  | 5.35E-05 | 0.001185 |
| RPF1       | 966.2458 | 0.532723 | 0.13188  | 4.039467 | 5.36E-05 | 0.001185 |
| SNRNP40    | 1518.503 | 0.467341 | 0.115706 | 4.039045 | 5.37E-05 | 0.001185 |
| ACAD11     | 626.4823 | -0.53552 | 0.132593 | -4.03883 | 5.37E-05 | 0.001185 |
| LRRC17     | 176.4167 | 0.9347   | 0.231693 | 4.034213 | 5.48E-05 | 0.001206 |
| DSCC1      | 439.7489 | 0.859863 | 0.213201 | 4.033118 | 5.50E-05 | 0.00121  |
| MEF2D      | 595.1287 | -0.6277  | 0.155789 | -4.02919 | 5.60E-05 | 0.001229 |
| XRCC5      | 14078.21 | 0.502653 | 0.124822 | 4.026945 | 5.65E-05 | 0.001238 |
| ACAT1      | 2031.962 | 0.516546 | 0.128292 | 4.02634  | 5.67E-05 | 0.001238 |
| HLA-E      | 4228.948 | -0.65202 | 0.161946 | -4.02616 | 5.67E-05 | 0.001238 |
| pcsk2      | 29.03759 | -1.56639 | 0.389085 | -4.02584 | 5.68E-05 | 0.001238 |
| TYMP       | 71.71138 | -1.40599 | 0.349248 | -4.02576 | 5.68E-05 | 0.001238 |
| TEX2       | 914.6268 | 0.490327 | 0.121839 | 4.024366 | 5.71E-05 | 0.001244 |

|           |          |          |          |          |          |          |
|-----------|----------|----------|----------|----------|----------|----------|
| RRM2      | 3147.234 | 0.551097 | 0.136961 | 4.023753 | 5.73E-05 | 0.001245 |
| IQSEC1    | 498.3976 | -0.58524 | 0.145477 | -4.02292 | 5.75E-05 | 0.001248 |
| TBC1D9B   | 2996.553 | -0.63106 | 0.156905 | -4.02195 | 5.77E-05 | 0.001251 |
| C8orf58   | 264.7098 | -0.76662 | 0.190696 | -4.02011 | 5.82E-05 | 0.001259 |
| GSN       | 2184.936 | -0.912   | 0.226984 | -4.01789 | 5.87E-05 | 0.001269 |
| SEMA3B    | 201.2392 | -1.11132 | 0.276608 | -4.01768 | 5.88E-05 | 0.001269 |
| hps5      | 1157.498 | 0.526709 | 0.131143 | 4.01631  | 5.91E-05 | 0.001273 |
| HTATSF1   | 1825.912 | 0.462964 | 0.115272 | 4.016261 | 5.91E-05 | 0.001273 |
| CAPS      | 51.33554 | -1.44551 | 0.359983 | -4.01548 | 5.93E-05 | 0.001274 |
| COX7B     | 3372.939 | 0.467032 | 0.116309 | 4.015447 | 5.93E-05 | 0.001274 |
| MOGS      | 1273.255 | -0.83585 | 0.208181 | -4.01502 | 5.94E-05 | 0.001274 |
| SNAI3     | 41.69829 | -1.32924 | 0.331086 | -4.01479 | 5.95E-05 | 0.001274 |
| PPFIBP1   | 3637.9   | -0.49668 | 0.123833 | -4.01092 | 6.05E-05 | 0.001293 |
| LMO4      | 1335.352 | 0.441357 | 0.110114 | 4.008199 | 6.12E-05 | 0.001306 |
| CPSF3     | 1323.699 | 0.515949 | 0.128826 | 4.00501  | 6.20E-05 | 0.001322 |
| DDX46     | 3224.55  | 0.554217 | 0.138392 | 4.004698 | 6.21E-05 | 0.001322 |
| UROS      | 546.8939 | 0.570734 | 0.142529 | 4.004329 | 6.22E-05 | 0.001322 |
| DLD       | 2302.178 | 0.565288 | 0.141189 | 4.00376  | 6.23E-05 | 0.001324 |
| GLO1      | 4664.534 | 0.4697   | 0.117326 | 4.003377 | 6.24E-05 | 0.001324 |
| GHDC      | 234.2524 | -0.90006 | 0.224897 | -4.0021  | 6.28E-05 | 0.001329 |
| TBC1D31   | 967.6874 | 0.549151 | 0.137264 | 4.000684 | 6.32E-05 | 0.001336 |
| MAGED2    | 3211.556 | -0.72065 | 0.180274 | -3.99749 | 6.40E-05 | 0.001352 |
| TMEM126B  | 904.132  | 0.529053 | 0.132549 | 3.991365 | 6.57E-05 | 0.001385 |
| SYNGR2    | 306.579  | -0.97194 | 0.24362  | -3.98957 | 6.62E-05 | 0.001394 |
| CHUK      | 856.324  | 0.655334 | 0.164283 | 3.989057 | 6.63E-05 | 0.001395 |
| CLCN5     | 301.7194 | 0.6874   | 0.172394 | 3.987372 | 6.68E-05 | 0.001403 |
| ERGIC1    | 4603.361 | -0.50635 | 0.127073 | -3.98468 | 6.76E-05 | 0.001417 |
| TOE1      | 434.3269 | 0.606063 | 0.152135 | 3.983728 | 6.78E-05 | 0.001419 |
| RRBP1     | 6891.823 | -0.55638 | 0.139665 | -3.98363 | 6.79E-05 | 0.001419 |
| ZW10      | 1084.753 | 0.549583 | 0.137969 | 3.983387 | 6.79E-05 | 0.001419 |
| CTAGE15   | 29.96307 | -1.73127 | 0.43466  | -3.98304 | 6.80E-05 | 0.001419 |
| DLAT      | 1980.932 | 0.484608 | 0.121685 | 3.982474 | 6.82E-05 | 0.001421 |
| SUMF1     | 512.1845 | -0.59436 | 0.149277 | -3.98162 | 6.84E-05 | 0.001424 |
| TMEM205   | 280.6314 | -0.72456 | 0.182014 | -3.98078 | 6.87E-05 | 0.001426 |
| USP39     | 1237.227 | 0.452906 | 0.113779 | 3.980566 | 6.88E-05 | 0.001426 |
| ING3      | 327.1714 | 0.598415 | 0.150367 | 3.979689 | 6.90E-05 | 0.00143  |
| ORC1      | 873.7576 | 0.54598  | 0.137263 | 3.977612 | 6.96E-05 | 0.00144  |
| SEC16A    | 2433.449 | -0.5883  | 0.148036 | -3.97406 | 7.07E-05 | 0.00146  |
| PPID      | 952.1961 | 0.454574 | 0.114414 | 3.973059 | 7.10E-05 | 0.001463 |
| CENPU     | 763.9998 | 0.659898 | 0.1661   | 3.972904 | 7.10E-05 | 0.001463 |
| KIAA2013  | 833.4443 | -0.86164 | 0.216904 | -3.97244 | 7.11E-05 | 0.001464 |
| PICK1     | 97.72941 | -0.90298 | 0.227516 | -3.96888 | 7.22E-05 | 0.001484 |
| HNRNPA1L2 | 2990.676 | 0.446192 | 0.112461 | 3.96752  | 7.26E-05 | 0.001489 |
| FANCD2    | 2012.584 | 0.566761 | 0.142889 | 3.966441 | 7.30E-05 | 0.001494 |
| masp1     | 1998.905 | -0.80078 | 0.201912 | -3.96598 | 7.31E-05 | 0.001494 |
| MASTL     | 1452.618 | 0.513255 | 0.129441 | 3.965165 | 7.33E-05 | 0.001498 |
| SLC16A9   | 209.8081 | 0.722997 | 0.182525 | 3.961089 | 7.46E-05 | 0.00152  |
| CACNA2D2  | 83.44456 | -1.12369 | 0.283689 | -3.961   | 7.46E-05 | 0.00152  |
| CLK3      | 1115.399 | -0.64721 | 0.163463 | -3.95938 | 7.51E-05 | 0.001527 |
| NOL9      | 1296.021 | 0.492855 | 0.124481 | 3.959281 | 7.52E-05 | 0.001527 |

|              |          |          |          |          |          |          |
|--------------|----------|----------|----------|----------|----------|----------|
| LINC00578    | 17.26975 | 2.152065 | 0.543699 | 3.958192 | 7.55E-05 | 0.00153  |
| POLD4        | 390.4818 | -0.73341 | 0.18529  | -3.95817 | 7.55E-05 | 0.00153  |
| ETF1         | 5165.253 | 0.472522 | 0.119436 | 3.956265 | 7.61E-05 | 0.00154  |
| POLQ         | 2014.276 | 0.648023 | 0.163838 | 3.955274 | 7.64E-05 | 0.001543 |
| PIGX         | 1213.938 | 0.471257 | 0.119155 | 3.954997 | 7.65E-05 | 0.001543 |
| ARRDC3       | 7459.228 | -0.61527 | 0.155572 | -3.95488 | 7.66E-05 | 0.001543 |
| XPO5         | 2533.483 | 0.443224 | 0.112129 | 3.952797 | 7.72E-05 | 0.001555 |
| DENND2A      | 84.14583 | -1.02911 | 0.260494 | -3.95061 | 7.80E-05 | 0.001567 |
| EIF4E        | 1505.389 | 0.553233 | 0.140185 | 3.946449 | 7.93E-05 | 0.001592 |
| KIAA1549     | 1295.595 | 0.448894 | 0.113774 | 3.945476 | 7.96E-05 | 0.001597 |
| IGFBP2       | 655.8797 | -0.86451 | 0.21915  | -3.94483 | 7.99E-05 | 0.001597 |
| TRIB1        | 1106.425 | 0.613487 | 0.155522 | 3.944704 | 7.99E-05 | 0.001597 |
| B4GALT7      | 416.8833 | -0.91171 | 0.231156 | -3.94415 | 8.01E-05 | 0.001597 |
| SMC1A        | 3086.628 | 0.431741 | 0.109464 | 3.944134 | 8.01E-05 | 0.001597 |
| SEZ6L2       | 829.9183 | -0.99853 | 0.253197 | -3.94368 | 8.02E-05 | 0.001598 |
| NCAPH        | 1071.262 | 0.498791 | 0.12656  | 3.941153 | 8.11E-05 | 0.001613 |
| NPC1         | 5913.442 | -0.43277 | 0.109922 | -3.93703 | 8.25E-05 | 0.001639 |
| SOX9         | 1407.282 | -0.45998 | 0.116876 | -3.93563 | 8.30E-05 | 0.001646 |
| TBC1D3B      | 252.4805 | -0.7633  | 0.194002 | -3.9345  | 8.34E-05 | 0.001652 |
| ARMCX3       | 2035.54  | -0.52128 | 0.132497 | -3.93423 | 8.35E-05 | 0.001652 |
| DIMT1        | 1018.171 | 0.524042 | 0.13323  | 3.933354 | 8.38E-05 | 0.001656 |
| ERCC4        | 768.8277 | 0.544246 | 0.138396 | 3.932535 | 8.41E-05 | 0.001659 |
| celsr3       | 1349.408 | -0.67146 | 0.17089  | -3.92918 | 8.52E-05 | 0.00168  |
| GCLM         | 10047.48 | 0.472594 | 0.120285 | 3.928953 | 8.53E-05 | 0.00168  |
| RUVBL1       | 1823.89  | 0.433197 | 0.110275 | 3.928342 | 8.55E-05 | 0.001682 |
| BRIP1        | 1456.197 | 0.731897 | 0.186341 | 3.927724 | 8.58E-05 | 0.001684 |
| HOMER1       | 641.2216 | 0.612116 | 0.155893 | 3.926508 | 8.62E-05 | 0.001691 |
| WDR45B       | 2544.889 | -0.47732 | 0.121654 | -3.92363 | 8.72E-05 | 0.001709 |
| GCSHP5       | 1005.449 | 0.560766 | 0.143029 | 3.920633 | 8.83E-05 | 0.001728 |
| RMI2         | 493.9503 | 0.638576 | 0.1629   | 3.920058 | 8.85E-05 | 0.00173  |
| SLC1A3       | 120.2188 | 0.819034 | 0.208954 | 3.91969  | 8.87E-05 | 0.00173  |
| LRPAP1       | 732.5183 | -0.85838 | 0.219054 | -3.91859 | 8.91E-05 | 0.001736 |
| CEBPG        | 1470.889 | 0.531159 | 0.135577 | 3.917765 | 8.94E-05 | 0.00174  |
| NUDT22       | 335.9664 | -0.99463 | 0.253932 | -3.91691 | 8.97E-05 | 0.001744 |
| LOC100132287 | 81.08625 | -1.08921 | 0.278171 | -3.9156  | 9.02E-05 | 0.001751 |
| AFG3L2       | 1996.287 | 0.413744 | 0.10576  | 3.912111 | 9.15E-05 | 0.001774 |
| LBR          | 3623.932 | 0.505126 | 0.129161 | 3.910813 | 9.20E-05 | 0.00178  |
| NUP205       | 4961.427 | 0.502995 | 0.128622 | 3.910638 | 9.21E-05 | 0.00178  |
| PSMD6        | 1482.09  | 0.555887 | 0.142156 | 3.9104   | 9.21E-05 | 0.00178  |
| SLC20A1      | 4402.934 | 0.500116 | 0.127964 | 3.90826  | 9.30E-05 | 0.001793 |
| ZNF469       | 281.5509 | -0.75433 | 0.19302  | -3.90802 | 9.31E-05 | 0.001793 |
| ELMSAN1      | 977.1904 | -0.46836 | 0.119875 | -3.90704 | 9.34E-05 | 0.001798 |
| SSB          | 2191.4   | 0.48363  | 0.123876 | 3.904151 | 9.46E-05 | 0.001818 |
| c16orf58     | 1338.185 | -0.90109 | 0.230819 | -3.90388 | 9.47E-05 | 0.001818 |
| LMAN2        | 2276.579 | -0.81936 | 0.210035 | -3.90108 | 9.58E-05 | 0.001836 |
| BCCIP        | 1226.81  | 0.508611 | 0.130402 | 3.900325 | 9.61E-05 | 0.001838 |
| LOC100132062 | 89.02648 | -1.07196 | 0.274864 | -3.89995 | 9.62E-05 | 0.001838 |
| HACD3        | 4309.857 | 0.445939 | 0.114345 | 3.899943 | 9.62E-05 | 0.001838 |
| TRAPPC13     | 806.0683 | 0.556385 | 0.142716 | 3.898542 | 9.68E-05 | 0.001847 |
| STMN1        | 6331.67  | 0.484297 | 0.124378 | 3.893751 | 9.87E-05 | 0.001881 |



|           |          |          |          |          |          |          |
|-----------|----------|----------|----------|----------|----------|----------|
| CMPK2     | 28.53795 | 1.496685 | 0.38442  | 3.893362 | 9.89E-05 | 0.001882 |
| TSEN2     | 426.4061 | 0.609458 | 0.156567 | 3.892629 | 9.92E-05 | 0.001885 |
| ICMT      | 1943.712 | 0.496289 | 0.127507 | 3.892248 | 9.93E-05 | 0.001886 |
| TTC19     | 1311.79  | 0.463741 | 0.119233 | 3.889355 | 0.000101 | 0.001905 |
| RN7SL1    | 439667.7 | -0.93673 | 0.240856 | -3.88916 | 0.000101 | 0.001905 |
| GDF15     | 116.6666 | 1.110381 | 0.285567 | 3.888336 | 0.000101 | 0.001908 |
| SSX2IP    | 1230.359 | 0.588899 | 0.151455 | 3.888284 | 0.000101 | 0.001908 |
| TLN1      | 8138.218 | -0.57639 | 0.148254 | -3.88788 | 0.000101 | 0.001908 |
| TBC1D3H   | 378.8471 | -0.66646 | 0.171497 | -3.88611 | 0.000102 | 0.001917 |
| HEG1      | 9011.813 | -0.49662 | 0.127794 | -3.88607 | 0.000102 | 0.001917 |
| RARA      | 388.1533 | -0.68707 | 0.176808 | -3.88596 | 0.000102 | 0.001917 |
| CTSA      | 3332.363 | -0.58448 | 0.150422 | -3.88559 | 0.000102 | 0.001917 |
| UTP11     | 928.654  | 0.551612 | 0.141978 | 3.8852   | 0.000102 | 0.001918 |
| HIST1H2BB | 472.4111 | 0.744499 | 0.191663 | 3.884409 | 0.000103 | 0.001922 |
| CNOT10    | 742.5002 | 0.58305  | 0.150285 | 3.879633 | 0.000105 | 0.001957 |
| CHORDC1   | 1738.637 | 0.583358 | 0.150389 | 3.878983 | 0.000105 | 0.00196  |
| DEK       | 8525.348 | 0.506729 | 0.130692 | 3.877263 | 0.000106 | 0.001972 |
| NIPAL3    | 1256.955 | -0.65004 | 0.167725 | -3.87564 | 0.000106 | 0.001983 |
| PGAM4     | 1400.264 | -0.54951 | 0.141865 | -3.87345 | 0.000107 | 0.001998 |
| TRIM24    | 990.9149 | 0.462551 | 0.119444 | 3.872533 | 0.000108 | 0.002003 |
| NUDT11    | 360.0376 | 0.579402 | 0.149699 | 3.870441 | 0.000109 | 0.002018 |
| SLF1      | 968.0941 | 0.633146 | 0.163691 | 3.867925 | 0.00011  | 0.002037 |
| ZNF85     | 247.53   | 0.772093 | 0.199647 | 3.867285 | 0.00011  | 0.002038 |
| QPCTL     | 264.8592 | -0.95568 | 0.247126 | -3.86719 | 0.00011  | 0.002038 |
| TMEM132B  | 1768.917 | 0.51636  | 0.13364  | 3.863817 | 0.000112 | 0.002062 |
| KIF16B    | 1607.923 | -0.52819 | 0.136703 | -3.86378 | 0.000112 | 0.002062 |
| CIB1      | 637.9511 | -0.76063 | 0.196956 | -3.86195 | 0.000112 | 0.002074 |
| ARMT1     | 595.8659 | 0.527711 | 0.136652 | 3.861707 | 0.000113 | 0.002074 |
| PPIL1     | 963.2751 | 0.480805 | 0.124534 | 3.860834 | 0.000113 | 0.002079 |
| FAM20A    | 89.20873 | -0.93464 | 0.242115 | -3.86032 | 0.000113 | 0.00208  |
| MTBP      | 649.4008 | 0.645289 | 0.167166 | 3.860163 | 0.000113 | 0.00208  |
| ADAMTS5   | 486.8542 | 0.574763 | 0.149118 | 3.854414 | 0.000116 | 0.002125 |
| MRPL3     | 1845.603 | 0.466671 | 0.121086 | 3.854041 | 0.000116 | 0.002125 |
| DIRC2     | 377.6903 | 0.541795 | 0.140579 | 3.854034 | 0.000116 | 0.002125 |
| SNRPG     | 813.4159 | 0.493307 | 0.128041 | 3.852711 | 0.000117 | 0.002134 |
| APIP      | 793.9604 | 0.509965 | 0.132381 | 3.852239 | 0.000117 | 0.002136 |
| ZBTB8OS   | 431.0452 | 0.586222 | 0.152387 | 3.846921 | 0.00012  | 0.00218  |
| XPR1      | 1520.371 | 0.426183 | 0.110794 | 3.846626 | 0.00012  | 0.00218  |
| PDGFC     | 205.8105 | -0.66086 | 0.171814 | -3.84635 | 0.00012  | 0.00218  |
| CAP2      | 2452.61  | 0.396364 | 0.103082 | 3.845118 | 0.00012  | 0.002188 |
| NET1      | 1212.83  | 0.48605  | 0.12649  | 3.842612 | 0.000122 | 0.002208 |
| AMD1      | 2011.632 | 0.575392 | 0.149807 | 3.840889 | 0.000123 | 0.002221 |
| GTPBP10   | 818.1963 | 0.565671 | 0.147307 | 3.840092 | 0.000123 | 0.002226 |
| BZW2      | 2753.562 | 0.428027 | 0.111471 | 3.83979  | 0.000123 | 0.002226 |
| SOGA1     | 1778.786 | -0.58056 | 0.151288 | -3.83745 | 0.000124 | 0.002245 |
| CYP4V2    | 190.341  | 0.749303 | 0.19537  | 3.835308 | 0.000125 | 0.002261 |
| TIMELESS  | 876.8067 | 0.598974 | 0.156184 | 3.835047 | 0.000126 | 0.002261 |
| MYH7B     | 97.47498 | -0.92704 | 0.24183  | -3.83343 | 0.000126 | 0.002274 |
| LAMB1     | 66119.84 | -0.44149 | 0.115178 | -3.83314 | 0.000127 | 0.002274 |
| BAZ1B     | 6154.885 | 0.479049 | 0.124987 | 3.832779 | 0.000127 | 0.002274 |

|           |          |          |          |          |          |          |
|-----------|----------|----------|----------|----------|----------|----------|
| SIL1      | 917.6453 | -0.60262 | 0.157281 | -3.83152 | 0.000127 | 0.002283 |
| EDEM2     | 912.0593 | -0.5195  | 0.135602 | -3.83105 | 0.000128 | 0.002285 |
| TIAM1     | 495.6346 | 0.559402 | 0.146055 | 3.83008  | 0.000128 | 0.002291 |
| LARS      | 7870.08  | 0.459143 | 0.119905 | 3.829227 | 0.000129 | 0.002297 |
| ZMPSTE24  | 1255.687 | 0.572712 | 0.149616 | 3.827869 | 0.000129 | 0.002304 |
| BRCA1     | 2591.788 | 0.664928 | 0.173709 | 3.827825 | 0.000129 | 0.002304 |
| SIPA1L2   | 1086.972 | 0.506506 | 0.13233  | 3.827586 | 0.000129 | 0.002304 |
| SUB1      | 3544.032 | 0.471002 | 0.123084 | 3.826663 | 0.00013  | 0.00231  |
| MTERF3    | 612.8497 | 0.563592 | 0.147359 | 3.824614 | 0.000131 | 0.002327 |
| CPA4      | 606.8518 | -0.9444  | 0.24697  | -3.82394 | 0.000131 | 0.00233  |
| c21orf2   | 264.1682 | -0.78549 | 0.205468 | -3.82293 | 0.000132 | 0.002337 |
| NUDT15    | 943.9505 | 0.455071 | 0.119168 | 3.818754 | 0.000134 | 0.002374 |
| SLC2A3    | 4274.743 | -0.86827 | 0.227432 | -3.8177  | 0.000135 | 0.002382 |
| SORBS3    | 615.4947 | -0.87037 | 0.228117 | -3.81547 | 0.000136 | 0.002401 |
| ABCF2     | 2170.512 | 0.442446 | 0.115978 | 3.814927 | 0.000136 | 0.002403 |
| DDX21     | 4053.873 | 0.536543 | 0.140655 | 3.814597 | 0.000136 | 0.002403 |
| methfd2   | 4229.402 | 0.556894 | 0.146013 | 3.814007 | 0.000137 | 0.002403 |
| rnf219    | 1096.793 | 0.557516 | 0.14618  | 3.813889 | 0.000137 | 0.002403 |
| CSRP2     | 396.5355 | -0.54882 | 0.143925 | -3.81324 | 0.000137 | 0.002403 |
| CDCP1     | 82.54528 | -0.91746 | 0.240607 | -3.81311 | 0.000137 | 0.002403 |
| BTF3L4    | 963.2007 | 0.518736 | 0.136046 | 3.812949 | 0.000137 | 0.002403 |
| ppdpf     | 293.1162 | -0.8787  | 0.230457 | -3.81285 | 0.000137 | 0.002403 |
| IPO7      | 9377.5   | 0.488677 | 0.128171 | 3.812709 | 0.000137 | 0.002403 |
| NUP107    | 2100.943 | 0.552806 | 0.145073 | 3.810538 | 0.000139 | 0.002421 |
| SLC25A33  | 158.6007 | 0.729949 | 0.191661 | 3.808536 | 0.00014  | 0.002438 |
| ORC5      | 440.8143 | 0.604349 | 0.158724 | 3.80755  | 0.00014  | 0.002445 |
| P3H1      | 4506.041 | -0.62606 | 0.164462 | -3.80672 | 0.000141 | 0.002451 |
| APLP1     | 400.4814 | -0.63736 | 0.167443 | -3.80642 | 0.000141 | 0.002451 |
| MRPL15    | 718.7493 | 0.537074 | 0.141156 | 3.804822 | 0.000142 | 0.002464 |
| GSTCD     | 357.7584 | 0.706297 | 0.185712 | 3.803176 | 0.000143 | 0.002473 |
| CASP3     | 1005.197 | 0.484771 | 0.12747  | 3.803016 | 0.000143 | 0.002473 |
| CARNS1    | 31.55838 | -1.52103 | 0.399958 | -3.80298 | 0.000143 | 0.002473 |
| GTF2A2    | 775.9075 | 0.512593 | 0.134792 | 3.802834 | 0.000143 | 0.002473 |
| ATP5B     | 13294.35 | 0.364615 | 0.095918 | 3.801327 | 0.000144 | 0.002484 |
| DOCK4     | 59.73658 | 1.19367  | 0.314062 | 3.80075  | 0.000144 | 0.002484 |
| CCDC102B  | 221.7157 | 0.965642 | 0.25407  | 3.800698 | 0.000144 | 0.002484 |
| DNM1L     | 2855.085 | 0.481266 | 0.126627 | 3.800649 | 0.000144 | 0.002484 |
| PRDX4     | 2234.547 | -0.43759 | 0.115166 | -3.79966 | 0.000145 | 0.002491 |
| ZDHHC9    | 1194.267 | -0.49075 | 0.129229 | -3.79754 | 0.000146 | 0.002509 |
| LRSAM1    | 322.1548 | -0.62121 | 0.163633 | -3.79635 | 0.000147 | 0.002519 |
| HAT1      | 1862.922 | 0.583163 | 0.15369  | 3.794411 | 0.000148 | 0.002536 |
| GLRX2     | 295.3172 | 0.692677 | 0.182619 | 3.793023 | 0.000149 | 0.002547 |
| HNMT      | 218.4085 | 0.639957 | 0.168791 | 3.791422 | 0.00015  | 0.00256  |
| SNX4      | 1089.942 | 0.455721 | 0.120206 | 3.791163 | 0.00015  | 0.00256  |
| NCBP1     | 1986.723 | 0.519241 | 0.137019 | 3.789556 | 0.000151 | 0.00257  |
| FCHSD1    | 551.0612 | -0.71211 | 0.187924 | -3.78933 | 0.000151 | 0.00257  |
| SEPHS1    | 1249.559 | 0.425295 | 0.112239 | 3.789189 | 0.000151 | 0.00257  |
| LOC79160  | 31.90932 | -1.53659 | 0.405523 | -3.78916 | 0.000151 | 0.00257  |
| SEC24D    | 5046.381 | -0.51797 | 0.136715 | -3.78868 | 0.000151 | 0.002572 |
| SNAI3-AS1 | 160.1281 | -0.73735 | 0.194695 | -3.78722 | 0.000152 | 0.002584 |

|           |          |          |          |          |          |          |
|-----------|----------|----------|----------|----------|----------|----------|
| AKR1B10   | 51283.14 | 0.761934 | 0.2012   | 3.786957 | 0.000153 | 0.002584 |
| IRS1      | 3260.224 | -0.40586 | 0.107283 | -3.78307 | 0.000155 | 0.002622 |
| PLK4      | 1029.165 | 0.58843  | 0.155581 | 3.782143 | 0.000155 | 0.002629 |
| LDHA      | 43449.19 | -0.63385 | 0.16766  | -3.7806  | 0.000156 | 0.002642 |
| CHPF      | 510.7149 | -1.12429 | 0.297529 | -3.77874 | 0.000158 | 0.002659 |
| COG2      | 672.4742 | 0.484045 | 0.128115 | 3.778217 | 0.000158 | 0.002659 |
| IMPDH1    | 1227.287 | -0.78225 | 0.207044 | -3.77818 | 0.000158 | 0.002659 |
| Snord43   | 41.85579 | 1.284923 | 0.34017  | 3.777294 | 0.000159 | 0.002666 |
| POLR1B    | 967.1765 | 0.506532 | 0.134124 | 3.776603 | 0.000159 | 0.002671 |
| c12orf4   | 546.0916 | 0.604059 | 0.160214 | 3.770321 | 0.000163 | 0.002732 |
| SAAL1     | 625.1794 | 0.618555 | 0.164062 | 3.770263 | 0.000163 | 0.002732 |
| LASP1     | 5811.98  | -0.41981 | 0.111353 | -3.77011 | 0.000163 | 0.002732 |
| FAM210B   | 1232.934 | 0.425422 | 0.112859 | 3.769486 | 0.000164 | 0.002736 |
| OBSCN     | 1006.775 | -0.87616 | 0.232461 | -3.76905 | 0.000164 | 0.002738 |
| FBXL8     | 48.38733 | -1.41707 | 0.37614  | -3.76739 | 0.000165 | 0.002753 |
| GPR3      | 36.80382 | 1.29053  | 0.342589 | 3.766989 | 0.000165 | 0.002754 |
| RABEP1    | 3170.98  | 0.481674 | 0.128047 | 3.761691 | 0.000169 | 0.00281  |
| NDUFS1    | 3178.421 | 0.405784 | 0.107905 | 3.760559 | 0.00017  | 0.00282  |
| GTF2E1    | 830.1625 | 0.471097 | 0.125282 | 3.76029  | 0.00017  | 0.00282  |
| LDOC1     | 210.3195 | -0.63094 | 0.167832 | -3.75937 | 0.00017  | 0.002827 |
| UTP14A    | 662.9279 | 0.5481   | 0.145818 | 3.758802 | 0.000171 | 0.002831 |
| RANBP6    | 1190.617 | 0.509841 | 0.135666 | 3.758074 | 0.000171 | 0.002836 |
| RGS2      | 366.8852 | 0.760325 | 0.20249  | 3.754876 | 0.000173 | 0.002869 |
| ercc6l    | 864.5571 | 0.643855 | 0.171513 | 3.75398  | 0.000174 | 0.002877 |
| ZNF738    | 521.4911 | 0.544724 | 0.145166 | 3.752424 | 0.000175 | 0.002891 |
| STK38L    | 215.3709 | 0.637769 | 0.170031 | 3.75091  | 0.000176 | 0.002906 |
| PDE12     | 584.9871 | 0.493098 | 0.13147  | 3.750647 | 0.000176 | 0.002906 |
| TP53RK    | 632.4869 | 0.561519 | 0.149746 | 3.749816 | 0.000177 | 0.002912 |
| RTN4IP1   | 225.8187 | 0.65869  | 0.175747 | 3.747947 | 0.000178 | 0.002929 |
| FASTKD5   | 795.366  | 0.550286 | 0.146826 | 3.74787  | 0.000178 | 0.002929 |
| DTX3      | 457.4431 | -0.76148 | 0.203336 | -3.74493 | 0.00018  | 0.00296  |
| HMGB2     | 5380.519 | 0.400782 | 0.107048 | 3.743955 | 0.000181 | 0.002966 |
| NFIL3     | 1784.449 | -0.53255 | 0.142245 | -3.74391 | 0.000181 | 0.002966 |
| RARRES1   | 291.7405 | -0.85642 | 0.228835 | -3.74251 | 0.000182 | 0.002979 |
| RNU5E-1   | 87.31691 | 0.934207 | 0.249658 | 3.741949 | 0.000183 | 0.002983 |
| KCNK6     | 22.37796 | -1.70071 | 0.454651 | -3.7407  | 0.000184 | 0.002995 |
| LYSMD2    | 194.8701 | 0.677707 | 0.181191 | 3.740288 | 0.000184 | 0.002996 |
| S100A10   | 2842.718 | -0.44988 | 0.120309 | -3.7394  | 0.000184 | 0.003004 |
| TMEM134   | 115.8317 | -1.27261 | 0.34056  | -3.7368  | 0.000186 | 0.003032 |
| COPRS     | 1370.644 | 0.44598  | 0.119369 | 3.736144 | 0.000187 | 0.003033 |
| rab11fip5 | 1090.592 | -0.66388 | 0.177691 | -3.73612 | 0.000187 | 0.003033 |
| DIS3L     | 1066.93  | 0.429909 | 0.115074 | 3.735939 | 0.000187 | 0.003033 |
| ASF1A     | 772.9978 | 0.50082  | 0.134076 | 3.735358 | 0.000187 | 0.003036 |
| WFDC13    | 11.19862 | -2.64868 | 0.709227 | -3.7346  | 0.000188 | 0.003042 |
| DENND3    | 270.742  | -0.67629 | 0.181141 | -3.73348 | 0.000189 | 0.003053 |
| PRMT6     | 200.4872 | 0.734891 | 0.196872 | 3.732833 | 0.000189 | 0.003057 |
| CISD2     | 813.2818 | 0.48457  | 0.129894 | 3.730513 | 0.000191 | 0.003082 |
| MAK16     | 1287.228 | 0.53356  | 0.143044 | 3.730028 | 0.000191 | 0.003085 |
| GSKIP     | 241.8414 | 0.671548 | 0.180112 | 3.728497 | 0.000193 | 0.003101 |
| SDHA      | 4628.355 | -0.51025 | 0.136869 | -3.72806 | 0.000193 | 0.003103 |

|          |          |          |          |          |          |          |
|----------|----------|----------|----------|----------|----------|----------|
| SPTLC3   | 704.2632 | -0.60247 | 0.161686 | -3.72616 | 0.000194 | 0.003123 |
| BRD7     | 1439.984 | 0.436586 | 0.117234 | 3.724058 | 0.000196 | 0.003146 |
| STIM2    | 321.7365 | 0.555381 | 0.149155 | 3.723504 | 0.000196 | 0.00315  |
| CHRNA5   | 161.834  | 0.876844 | 0.235569 | 3.722241 | 0.000197 | 0.003162 |
| WNT5B    | 1859.565 | -0.49823 | 0.133891 | -3.72112 | 0.000198 | 0.003173 |
| MBNL3    | 430.6052 | 0.653609 | 0.175735 | 3.719291 | 0.0002   | 0.003193 |
| fank1    | 84.21947 | -0.99062 | 0.266456 | -3.71777 | 0.000201 | 0.003209 |
| HIGD1A   | 1711.897 | 0.552432 | 0.148633 | 3.716739 | 0.000202 | 0.003216 |
| CTSC     | 447.2407 | 0.509436 | 0.137069 | 3.716637 | 0.000202 | 0.003216 |
| ZNF30    | 122.1347 | 0.82269  | 0.221507 | 3.714054 | 0.000204 | 0.003246 |
| RN7SL2   | 410814.3 | -0.88567 | 0.238526 | -3.71308 | 0.000205 | 0.003253 |
| SOCS4    | 1152.401 | 0.476538 | 0.128345 | 3.712951 | 0.000205 | 0.003253 |
| ITGB3    | 1478.106 | -0.53146 | 0.14317  | -3.71212 | 0.000206 | 0.003261 |
| LOXL3    | 172.4761 | -0.71785 | 0.193454 | -3.71071 | 0.000207 | 0.003275 |
| RRAS     | 391.2628 | -1.00527 | 0.270924 | -3.71052 | 0.000207 | 0.003275 |
| TLDC1    | 1086.26  | -0.43229 | 0.116543 | -3.70927 | 0.000208 | 0.003285 |
| CTDSPL   | 884.0377 | 0.459406 | 0.123856 | 3.709205 | 0.000208 | 0.003285 |
| PLAT     | 233.9428 | -0.77372 | 0.208641 | -3.70836 | 0.000209 | 0.003292 |
| KLHL5    | 2438.193 | 0.475273 | 0.128178 | 3.707902 | 0.000209 | 0.003292 |
| STXBP4   | 609.6426 | 0.626382 | 0.168932 | 3.707897 | 0.000209 | 0.003292 |
| PRKCSH   | 2531.014 | -0.71183 | 0.192016 | -3.70717 | 0.00021  | 0.003298 |
| LTBP4    | 283.2046 | -1.08774 | 0.293624 | -3.70455 | 0.000212 | 0.003326 |
| PDCL3    | 195.67   | 0.626181 | 0.169032 | 3.704521 | 0.000212 | 0.003326 |
| P3H3     | 875.6297 | -0.9459  | 0.255514 | -3.70193 | 0.000214 | 0.003357 |
| ARHGEF26 | 148.4881 | 0.769853 | 0.208222 | 3.69727  | 0.000218 | 0.003415 |
| TRIOBP   | 1190.287 | -0.65986 | 0.178525 | -3.69615 | 0.000219 | 0.003427 |
| ACTL6A   | 1735.157 | 0.476705 | 0.128984 | 3.695842 | 0.000219 | 0.003428 |
| SNORD16  | 32.92411 | 1.469919 | 0.397946 | 3.693764 | 0.000221 | 0.003452 |
| CDC123   | 1154.569 | 0.434525 | 0.117711 | 3.691463 | 0.000223 | 0.00348  |
| POM121C  | 1141.282 | -0.41992 | 0.113819 | -3.68935 | 0.000225 | 0.003502 |
| LCAT     | 127.6712 | -0.83492 | 0.226365 | -3.68838 | 0.000226 | 0.003512 |
| ATP2B4   | 4693.028 | -0.49646 | 0.134689 | -3.68599 | 0.000228 | 0.003542 |
| SPAST    | 773.7243 | 0.508002 | 0.13785  | 3.685167 | 0.000229 | 0.003549 |
| B3GALNT2 | 1366.724 | 0.444345 | 0.120659 | 3.682641 | 0.000231 | 0.003581 |
| MYH9     | 20306.46 | -0.58427 | 0.158732 | -3.68086 | 0.000232 | 0.0036   |
| c20orf24 | 2411.384 | 0.417214 | 0.113349 | 3.68078  | 0.000233 | 0.0036   |
| ATG3     | 1457.018 | 0.479231 | 0.130266 | 3.678869 | 0.000234 | 0.003621 |
| ADAT2    | 271.2931 | 0.638419 | 0.173544 | 3.678718 | 0.000234 | 0.003621 |
| CD151    | 4404.363 | -0.9213  | 0.25046  | -3.67844 | 0.000235 | 0.003621 |
| ASIC4    | 21.11674 | -1.71839 | 0.467169 | -3.6783  | 0.000235 | 0.003621 |
| MAPK7    | 233.4875 | -0.9056  | 0.246563 | -3.67289 | 0.00024  | 0.003689 |
| METTL26  | 398.4268 | -0.83516 | 0.227394 | -3.67276 | 0.00024  | 0.003689 |
| BDKRB2   | 99.52329 | -0.94648 | 0.257703 | -3.67275 | 0.00024  | 0.003689 |
| FBXO33   | 431.5527 | 0.531368 | 0.144778 | 3.670235 | 0.000242 | 0.003722 |
| EXOSC9   | 963.0285 | 0.471903 | 0.128621 | 3.668948 | 0.000244 | 0.003735 |
| METTL21B | 590.9876 | -0.5667  | 0.154461 | -3.66886 | 0.000244 | 0.003735 |
| CTAGE4   | 18.43917 | -1.98576 | 0.541393 | -3.66787 | 0.000245 | 0.003746 |
| ICAM5    | 17.95488 | -1.91631 | 0.522611 | -3.66681 | 0.000246 | 0.003756 |
| RAD51AP1 | 1039.464 | 0.518092 | 0.141299 | 3.66663  | 0.000246 | 0.003756 |
| MGLL     | 378.2105 | -0.75379 | 0.205601 | -3.66626 | 0.000246 | 0.003758 |

|              |          |          |          |          |          |          |
|--------------|----------|----------|----------|----------|----------|----------|
| c1orf112     | 615.2451 | 0.639973 | 0.174604 | 3.665272 | 0.000247 | 0.003769 |
| PPHLN1       | 1223.52  | 0.435212 | 0.118749 | 3.664976 | 0.000247 | 0.00377  |
| CLK1         | 1299.815 | -0.51053 | 0.139323 | -3.66436 | 0.000248 | 0.003773 |
| PDIA3P1      | 5326.397 | -0.40734 | 0.111166 | -3.66424 | 0.000248 | 0.003773 |
| QRS1         | 442.9442 | 0.545894 | 0.14906  | 3.662242 | 0.00025  | 0.003798 |
| CCL2         | 83.41843 | 1.201142 | 0.328    | 3.662022 | 0.00025  | 0.003798 |
| CCNB1        | 5534.546 | 0.436342 | 0.119168 | 3.66158  | 0.000251 | 0.003801 |
| GFM1         | 2365.84  | 0.479121 | 0.130869 | 3.661081 | 0.000251 | 0.003802 |
| MEF2A        | 2541.407 | -0.49191 | 0.134366 | -3.66099 | 0.000251 | 0.003802 |
| ATP5G3       | 4961.468 | 0.424905 | 0.116141 | 3.65854  | 0.000254 | 0.003835 |
| LOC100289230 | 127.2575 | -0.88974 | 0.243227 | -3.65806 | 0.000254 | 0.003835 |
| GPRIN3       | 186.7854 | -0.70859 | 0.193708 | -3.65802 | 0.000254 | 0.003835 |
| RAN          | 5721.13  | 0.41791  | 0.11426  | 3.657543 | 0.000255 | 0.003835 |
| LOC100272217 | 54.34175 | -1.19479 | 0.326731 | -3.6568  | 0.000255 | 0.003842 |
| MSH6         | 4371.719 | 0.448915 | 0.122778 | 3.656319 | 0.000256 | 0.003846 |
| RRP15        | 942.7572 | 0.540555 | 0.147877 | 3.655433 | 0.000257 | 0.003855 |
| NCOR2        | 699.393  | -0.78527 | 0.214892 | -3.65424 | 0.000258 | 0.00387  |
| NAA15        | 3064.378 | 0.550611 | 0.150714 | 3.65336  | 0.000259 | 0.003879 |
| NALCN        | 289.8134 | -0.56838 | 0.15569  | -3.65072 | 0.000262 | 0.003913 |
| COL6A1       | 3780.96  | -0.86232 | 0.236212 | -3.65062 | 0.000262 | 0.003913 |
| FAM173B      | 447.0431 | 0.564174 | 0.154571 | 3.649927 | 0.000262 | 0.00392  |
| KCNQ1OT1     | 3035.825 | -0.60008 | 0.164511 | -3.64765 | 0.000265 | 0.003951 |
| Snora5c      | 84.64525 | -1.17084 | 0.321023 | -3.64721 | 0.000265 | 0.003954 |
| SEN1         | 897.6435 | 0.489219 | 0.134232 | 3.644594 | 0.000268 | 0.003991 |
| TXNL1        | 1018.786 | 0.506254 | 0.13894  | 3.643693 | 0.000269 | 0.004001 |
| RHBDF2       | 333.0835 | -0.75437 | 0.207048 | -3.64344 | 0.000269 | 0.004001 |
| SPC25        | 295.0452 | 0.74899  | 0.20559  | 3.643117 | 0.000269 | 0.004002 |
| CHRM2        | 107.039  | -0.89217 | 0.245009 | -3.64139 | 0.000271 | 0.004025 |
| MAGED1       | 5722.749 | -0.67098 | 0.184347 | -3.63978 | 0.000273 | 0.004046 |
| OST4         | 599.8014 | -0.6547  | 0.179908 | -3.63909 | 0.000274 | 0.004053 |
| LDHD         | 21.44717 | -1.62268 | 0.445964 | -3.63859 | 0.000274 | 0.004057 |
| SAE1         | 3603.927 | 0.397451 | 0.109268 | 3.637387 | 0.000275 | 0.004072 |
| INF2         | 316.6303 | -0.81684 | 0.224646 | -3.63614 | 0.000277 | 0.004088 |
| ELAVL2       | 213.27   | 0.75813  | 0.208558 | 3.635108 | 0.000278 | 0.004101 |
| UBE2O        | 1869.815 | -0.63201 | 0.173951 | -3.63326 | 0.00028  | 0.004119 |
| SMC3         | 2848.714 | 0.532898 | 0.146675 | 3.633197 | 0.00028  | 0.004119 |
| GNAS         | 22945.05 | -0.44541 | 0.122613 | -3.63265 | 0.000281 | 0.004124 |
| ZNF252P      | 914.1692 | 0.447665 | 0.123247 | 3.63225  | 0.000281 | 0.004127 |
| STARD4-AS1   | 432.7792 | -0.57295 | 0.157811 | -3.6306  | 0.000283 | 0.004149 |
| CPSF2        | 2072.422 | 0.501001 | 0.138034 | 3.62955  | 0.000284 | 0.004162 |
| GMPPA        | 1193.086 | -0.60738 | 0.167433 | -3.62763 | 0.000286 | 0.004189 |
| ZCCHC10      | 537.0702 | 0.524922 | 0.144754 | 3.626313 | 0.000287 | 0.004207 |
| ELAC1        | 59.34989 | 1.103921 | 0.304441 | 3.62606  | 0.000288 | 0.004207 |
| herc3        | 2348.615 | -0.45308 | 0.125007 | -3.62445 | 0.00029  | 0.004228 |
| SLC1A1       | 658.581  | -0.50284 | 0.138741 | -3.62429 | 0.00029  | 0.004228 |
| UBE2T        | 1211.537 | 0.487306 | 0.134465 | 3.62403  | 0.00029  | 0.004228 |
| FOX1         | 78.70931 | -0.92127 | 0.25428  | -3.62307 | 0.000291 | 0.00424  |
| CHST10       | 199.3341 | 0.677301 | 0.187084 | 3.620301 | 0.000294 | 0.004281 |
| ACSL5        | 570.6892 | 0.49156  | 0.135787 | 3.620072 | 0.000295 | 0.004281 |
| LOC90784     | 223.2018 | 0.643616 | 0.177984 | 3.616147 | 0.000299 | 0.004342 |

|              |          |          |          |          |          |          |
|--------------|----------|----------|----------|----------|----------|----------|
| NUCB1        | 2513.149 | -0.83229 | 0.230302 | -3.61388 | 0.000302 | 0.004376 |
| NFIX         | 1446.762 | -0.50363 | 0.139467 | -3.61108 | 0.000305 | 0.00442  |
| TMX3         | 3198.748 | 0.427311 | 0.118361 | 3.610233 | 0.000306 | 0.004429 |
| slc26a6      | 772.0484 | -0.61286 | 0.169764 | -3.61008 | 0.000306 | 0.004429 |
| CPNE8        | 404.4346 | 0.581842 | 0.16122  | 3.608989 | 0.000307 | 0.004443 |
| RBMXL1       | 1205.424 | 0.49093  | 0.136057 | 3.608266 | 0.000308 | 0.004451 |
| PSG5         | 176.9936 | -0.85177 | 0.236122 | -3.60733 | 0.000309 | 0.004463 |
| EVA1B        | 72.98438 | -1.1188  | 0.310208 | -3.60663 | 0.00031  | 0.004471 |
| SURF4        | 6461.554 | -0.45034 | 0.124907 | -3.60541 | 0.000312 | 0.004482 |
| Cox5a        | 1768.112 | 0.426559 | 0.118316 | 3.605243 | 0.000312 | 0.004482 |
| MTMR11       | 536.3176 | -0.62925 | 0.174537 | -3.60522 | 0.000312 | 0.004482 |
| LOC100506571 | 45.14751 | -1.1884  | 0.32965  | -3.60504 | 0.000312 | 0.004482 |
| SYNPO        | 678.9082 | -0.6384  | 0.177116 | -3.60441 | 0.000313 | 0.004488 |
| CIAPIN1      | 1164.556 | 0.413869 | 0.114854 | 3.603451 | 0.000314 | 0.004501 |
| ZC3H14       | 1449.629 | 0.440047 | 0.122144 | 3.6027   | 0.000315 | 0.00451  |
| ACADVL       | 5594.581 | -0.55331 | 0.153614 | -3.60197 | 0.000316 | 0.004517 |
| ZMIZ1        | 2165.034 | -0.60764 | 0.168711 | -3.60167 | 0.000316 | 0.004517 |
| NAV2         | 615.9153 | -0.81094 | 0.225161 | -3.60158 | 0.000316 | 0.004517 |
| PNCK         | 17.34919 | -1.93763 | 0.538063 | -3.60112 | 0.000317 | 0.00452  |
| CHAF1B       | 800.3204 | 0.51908  | 0.144264 | 3.598128 | 0.000321 | 0.004569 |
| DHRS3        | 163.1856 | -0.91458 | 0.25426  | -3.59702 | 0.000322 | 0.004584 |
| TTC28        | 53.68117 | -1.02908 | 0.286179 | -3.59594 | 0.000323 | 0.004596 |
| SPAG1        | 155.993  | 0.84259  | 0.234322 | 3.595869 | 0.000323 | 0.004596 |
| FRG1         | 378.168  | 0.55678  | 0.154915 | 3.59409  | 0.000326 | 0.004613 |
| C1R          | 7439.401 | -0.70777 | 0.196929 | -3.59406 | 0.000326 | 0.004613 |
| LOC148696    | 98.90188 | -0.83338 | 0.231886 | -3.59391 | 0.000326 | 0.004613 |
| CCDC138      | 303.6673 | 0.632194 | 0.175987 | 3.59227  | 0.000328 | 0.004634 |
| SLC16A2      | 1230.296 | -0.45309 | 0.126129 | -3.59225 | 0.000328 | 0.004634 |
| LOC729737    | 39.71613 | -1.24566 | 0.3468   | -3.59187 | 0.000328 | 0.004637 |
| FARSB        | 2300.686 | 0.509655 | 0.14192  | 3.591148 | 0.000329 | 0.004646 |
| VMA21        | 4186.901 | 0.392581 | 0.109347 | 3.590227 | 0.00033  | 0.004658 |
| ANKFN1       | 12.7722  | 2.719809 | 0.757717 | 3.58948  | 0.000331 | 0.004667 |
| NDFIP2       | 803.5387 | 0.443903 | 0.123719 | 3.588003 | 0.000333 | 0.004687 |
| DNAJB2       | 612.7659 | -0.81388 | 0.226839 | -3.5879  | 0.000333 | 0.004687 |
| ATP5J        | 1305.971 | 0.43045  | 0.120024 | 3.586365 | 0.000335 | 0.004708 |
| SGIP1        | 22.3798  | -1.58134 | 0.440954 | -3.58619 | 0.000336 | 0.004708 |
| TTF2         | 1952.751 | 0.511057 | 0.142515 | 3.585998 | 0.000336 | 0.004708 |
| Snora81      | 185.4001 | 0.790518 | 0.22053  | 3.584622 | 0.000338 | 0.004728 |
| DAP          | 1542.721 | -0.40532 | 0.113079 | -3.58444 | 0.000338 | 0.004728 |
| WDR60        | 1029.728 | -0.42714 | 0.119181 | -3.58399 | 0.000338 | 0.004732 |
| FAM129B      | 2761.911 | -0.85468 | 0.23854  | -3.58296 | 0.00034  | 0.004746 |
| EXOG         | 210.0885 | 0.775403 | 0.216431 | 3.582681 | 0.00034  | 0.004747 |
| GTF2IP4      | 8046.731 | 0.389926 | 0.108878 | 3.581306 | 0.000342 | 0.004767 |
| MRPL35       | 1006.731 | 0.480751 | 0.134286 | 3.580046 | 0.000344 | 0.004786 |
| DUSP4        | 731.018  | 0.57564  | 0.160839 | 3.57899  | 0.000345 | 0.004801 |
| SNTA1        | 520.9644 | -0.80165 | 0.22405  | -3.578   | 0.000346 | 0.004815 |
| NKD2         | 43.65648 | -1.29503 | 0.362086 | -3.57659 | 0.000348 | 0.004833 |
| ABHD13       | 575.1228 | 0.510548 | 0.14275  | 3.576525 | 0.000348 | 0.004833 |
| ZNF669       | 223.3972 | 0.632829 | 0.17695  | 3.576321 | 0.000348 | 0.004833 |
| DBP          | 188.7795 | -0.72792 | 0.20365  | -3.57434 | 0.000351 | 0.004865 |

|              |          |          |          |          |          |          |
|--------------|----------|----------|----------|----------|----------|----------|
| LINC00842    | 559.4271 | -0.74092 | 0.207299 | -3.57413 | 0.000351 | 0.004865 |
| SEH1L        | 988.0141 | 0.479772 | 0.134248 | 3.573775 | 0.000352 | 0.004867 |
| SH3BGR13     | 1369.148 | -0.55074 | 0.154219 | -3.57113 | 0.000355 | 0.004911 |
| qsox1        | 1716.596 | -0.7524  | 0.210699 | -3.57098 | 0.000356 | 0.004911 |
| MANF         | 1874.716 | -0.46439 | 0.130105 | -3.56935 | 0.000358 | 0.004937 |
| STK39        | 807.4347 | 0.497483 | 0.139399 | 3.568764 | 0.000359 | 0.004944 |
| RRM1         | 5850.12  | 0.46215  | 0.129514 | 3.568337 | 0.000359 | 0.004944 |
| DDIT4        | 3360.799 | -0.79483 | 0.222749 | -3.56827 | 0.000359 | 0.004944 |
| CDK1         | 3649.116 | 0.43369  | 0.121561 | 3.567688 | 0.00036  | 0.004949 |
| CCDC34       | 461.9234 | 0.519731 | 0.145685 | 3.567501 | 0.00036  | 0.004949 |
| TRPA1        | 467.3042 | 0.577244 | 0.161815 | 3.567311 | 0.000361 | 0.004949 |
| plrg1        | 1630.53  | 0.449487 | 0.126041 | 3.566185 | 0.000362 | 0.004963 |
| SERF2        | 3518.631 | -0.85138 | 0.238741 | -3.56611 | 0.000362 | 0.004963 |
| TRIM46       | 33.96149 | -1.35988 | 0.381359 | -3.56587 | 0.000363 | 0.004963 |
| CROT         | 1777.819 | 0.409941 | 0.114971 | 3.565591 | 0.000363 | 0.004963 |
| DDX41        | 1547.942 | -0.59553 | 0.16703  | -3.56543 | 0.000363 | 0.004963 |
| UBE2N        | 1733.802 | 0.430381 | 0.120747 | 3.564326 | 0.000365 | 0.004979 |
| GINS4        | 599.0055 | 0.617944 | 0.173386 | 3.563983 | 0.000365 | 0.004981 |
| FAM114A1     | 4628.579 | -0.48738 | 0.136803 | -3.56264 | 0.000367 | 0.005002 |
| MED21        | 829.3306 | 0.502272 | 0.141028 | 3.561499 | 0.000369 | 0.00502  |
| BLMH         | 1451.434 | 0.459425 | 0.129023 | 3.560796 | 0.00037  | 0.005021 |
| NQO1         | 77609.35 | 0.428621 | 0.120379 | 3.560602 | 0.00037  | 0.005021 |
| MEGF8        | 1014.196 | -0.68753 | 0.193101 | -3.56046 | 0.00037  | 0.005021 |
| B4GALT6      | 454.584  | 0.572762 | 0.160869 | 3.560428 | 0.00037  | 0.005021 |
| GUSBP3       | 1198.185 | -0.4025  | 0.113053 | -3.56026 | 0.00037  | 0.005021 |
| MARS         | 3171.7   | 0.517603 | 0.145457 | 3.558454 | 0.000373 | 0.005051 |
| PTDSS1       | 3296.534 | 0.363077 | 0.102118 | 3.555466 | 0.000377 | 0.005103 |
| HLA-C        | 6906.51  | -0.68184 | 0.191785 | -3.55521 | 0.000378 | 0.005103 |
| SKP2         | 1397.666 | 0.436358 | 0.122742 | 3.555084 | 0.000378 | 0.005103 |
| GTF2IP1      | 7799.764 | 0.389536 | 0.109593 | 3.554405 | 0.000379 | 0.005112 |
| GPRC5A       | 524.0093 | -0.75617 | 0.212859 | -3.55245 | 0.000382 | 0.005146 |
| PLAA         | 1234.086 | 0.561536 | 0.158109 | 3.551575 | 0.000383 | 0.005158 |
| INHA         | 31.55672 | -1.43633 | 0.404706 | -3.54906 | 0.000387 | 0.005203 |
| CDKN3        | 713.3214 | 0.503413 | 0.141897 | 3.547734 | 0.000389 | 0.005225 |
| GTF2H1       | 1490.225 | 0.4056   | 0.114341 | 3.547289 | 0.000389 | 0.005229 |
| PHPT1        | 491.1634 | -0.94646 | 0.2669   | -3.54611 | 0.000391 | 0.005245 |
| ap1g2        | 484.5763 | -0.70213 | 0.198013 | -3.54586 | 0.000391 | 0.005245 |
| ARL13B       | 479.6257 | 0.590848 | 0.166634 | 3.545796 | 0.000391 | 0.005245 |
| UCKL1-AS1    | 55.51636 | -1.03177 | 0.291036 | -3.54515 | 0.000392 | 0.005254 |
| PIK3R4       | 1482.259 | 0.394466 | 0.111291 | 3.54446  | 0.000393 | 0.005263 |
| CHAMP1       | 548.7395 | 0.537107 | 0.151613 | 3.542622 | 0.000396 | 0.005295 |
| LOC100129492 | 148.498  | 0.706413 | 0.199499 | 3.540931 | 0.000399 | 0.005324 |
| RBBP7        | 4637.963 | 0.375015 | 0.105944 | 3.539744 | 0.000401 | 0.005344 |
| CCT4         | 5619.428 | 0.442442 | 0.125003 | 3.539455 | 0.000401 | 0.005345 |
| PDGFRB       | 5088.145 | -0.63419 | 0.179209 | -3.53884 | 0.000402 | 0.00535  |
| WFS1         | 357.5759 | -0.81648 | 0.230728 | -3.53873 | 0.000402 | 0.00535  |
| IARS         | 10212.64 | 0.405898 | 0.114737 | 3.537649 | 0.000404 | 0.005368 |
| PGRMC2       | 1317.273 | -0.53305 | 0.150691 | -3.53734 | 0.000404 | 0.005369 |
| PDCD5        | 846.5311 | 0.505109 | 0.142835 | 3.536314 | 0.000406 | 0.005386 |
| ATN1         | 536.697  | -0.55086 | 0.155968 | -3.53188 | 0.000413 | 0.005467 |

|          |          |          |          |          |          |          |
|----------|----------|----------|----------|----------|----------|----------|
| ZBTB25   | 167.8202 | -0.63921 | 0.181001 | -3.53151 | 0.000413 | 0.005468 |
| RPN2     | 13971.69 | -0.39547 | 0.111995 | -3.53113 | 0.000414 | 0.005468 |
| ZNF730   | 248.5153 | 0.666694 | 0.188814 | 3.53096  | 0.000414 | 0.005468 |
| NDUFA4   | 2384.452 | 0.415431 | 0.117654 | 3.530948 | 0.000414 | 0.005468 |
| MYO1C    | 3810.625 | -0.65941 | 0.186767 | -3.53065 | 0.000415 | 0.005469 |
| BAG2     | 1146.721 | 0.529467 | 0.149981 | 3.530221 | 0.000415 | 0.005474 |
| dsn1     | 1707.632 | 0.42323  | 0.120021 | 3.526307 | 0.000421 | 0.005549 |
| BCAR1    | 752.0597 | -0.90371 | 0.256288 | -3.52613 | 0.000422 | 0.005549 |
| MICA     | 561.8252 | -0.51708 | 0.146714 | -3.52442 | 0.000424 | 0.005581 |
| DOCK11   | 864.4166 | 0.5028   | 0.142673 | 3.524133 | 0.000425 | 0.005581 |
| TLE6     | 41.94673 | -1.27196 | 0.360991 | -3.52354 | 0.000426 | 0.005581 |
| PDIK1L   | 480.4262 | 0.5576   | 0.158251 | 3.523514 | 0.000426 | 0.005581 |
| AGAP1    | 633.5407 | -0.49846 | 0.141484 | -3.52308 | 0.000427 | 0.005581 |
| PAFAH1B2 | 4851.881 | 0.370734 | 0.105231 | 3.523066 | 0.000427 | 0.005581 |
| Hist1h1d | 3751.463 | 0.462921 | 0.131398 | 3.523042 | 0.000427 | 0.005581 |
| CLSTN1   | 2255.864 | -0.51531 | 0.146281 | -3.52276 | 0.000427 | 0.005582 |
| CST3     | 1565.647 | -0.91247 | 0.259104 | -3.52163 | 0.000429 | 0.005597 |
| ACADM    | 1638.111 | 0.485375 | 0.137828 | 3.52161  | 0.000429 | 0.005597 |
| AAGAB    | 1423.485 | 0.519479 | 0.14754  | 3.520943 | 0.00043  | 0.005607 |
| AFMID    | 405.2743 | -0.61177 | 0.1738   | -3.51998 | 0.000432 | 0.005622 |
| PSPH     | 893.1869 | 0.427053 | 0.121363 | 3.51881  | 0.000433 | 0.005638 |
| GDPD3    | 70.48606 | -1.03874 | 0.295207 | -3.51869 | 0.000434 | 0.005638 |
| POFUT2   | 2775.418 | -0.65396 | 0.18586  | -3.51858 | 0.000434 | 0.005638 |
| HUNK     | 204.1063 | 0.646662 | 0.183803 | 3.518228 | 0.000434 | 0.00564  |
| GTPBP4   | 1766.334 | 0.430765 | 0.122459 | 3.517624 | 0.000435 | 0.005648 |
| KIF15    | 1816.868 | 0.503981 | 0.143291 | 3.517174 | 0.000436 | 0.005653 |
| PKP4     | 1573.891 | 0.393222 | 0.111884 | 3.514554 | 0.00044  | 0.005705 |
| TBC1D22A | 574.2524 | -0.59546 | 0.169468 | -3.5137  | 0.000442 | 0.005714 |
| SRSF2    | 4370.208 | 0.394981 | 0.112412 | 3.513679 | 0.000442 | 0.005714 |
| ABLIM1   | 190.2782 | -0.81389 | 0.23172  | -3.51239 | 0.000444 | 0.005737 |
| RIPK4    | 475.797  | -0.47961 | 0.136566 | -3.51196 | 0.000445 | 0.005741 |
| WDR35    | 656.8199 | 0.510113 | 0.1454   | 3.508349 | 0.000451 | 0.005815 |
| IGFBP7   | 855.1381 | -0.57502 | 0.163938 | -3.50756 | 0.000452 | 0.005827 |
| TRMT6    | 636.1092 | 0.484954 | 0.138302 | 3.50648  | 0.000454 | 0.005846 |
| POLR2A   | 2071.225 | -0.64129 | 0.183018 | -3.50399 | 0.000458 | 0.005896 |
| PTGS2    | 16.68617 | -1.8698  | 0.533933 | -3.50193 | 0.000462 | 0.005934 |
| BOK      | 102.1943 | -0.85061 | 0.242916 | -3.50166 | 0.000462 | 0.005934 |
| ZNF326   | 523.1867 | 0.623094 | 0.177945 | 3.501605 | 0.000462 | 0.005934 |
| TPI1P3   | 126.2673 | -0.73846 | 0.210987 | -3.50003 | 0.000465 | 0.005965 |
| WDR70    | 1025.508 | 0.429157 | 0.122625 | 3.499753 | 0.000466 | 0.005966 |
| SASS6    | 744.3194 | 0.543461 | 0.155359 | 3.498105 | 0.000469 | 0.005995 |
| CHEK2    | 673.4204 | 0.449154 | 0.128409 | 3.497845 | 0.000469 | 0.005995 |
| ETFA     | 3873.751 | 0.408998 | 0.116931 | 3.497784 | 0.000469 | 0.005995 |
| GCSH     | 578.3818 | 0.574692 | 0.164411 | 3.495468 | 0.000473 | 0.006042 |
| KIAA0101 | 974.3278 | 0.543169 | 0.155424 | 3.494751 | 0.000475 | 0.006054 |
| STRBP    | 780.1367 | 0.509012 | 0.145671 | 3.494263 | 0.000475 | 0.00606  |
| ZGRF1    | 1327.58  | 0.544165 | 0.155779 | 3.493182 | 0.000477 | 0.006076 |
| HERPUD1  | 2681.588 | -0.62918 | 0.180122 | -3.4931  | 0.000477 | 0.006076 |
| SLC12A4  | 1421.969 | -0.70961 | 0.203168 | -3.49274 | 0.000478 | 0.006079 |
| CDC14A   | 199.0673 | 0.62522  | 0.17908  | 3.491277 | 0.000481 | 0.006108 |



|              |          |          |          |          |          |          |
|--------------|----------|----------|----------|----------|----------|----------|
| RNU5D-1      | 35.04098 | 1.207732 | 0.345959 | 3.490965 | 0.000481 | 0.00611  |
| MLH1         | 1145.98  | 0.450905 | 0.129184 | 3.490409 | 0.000482 | 0.006117 |
| TERC         | 105.0191 | -1.09326 | 0.313289 | -3.48962 | 0.000484 | 0.006131 |
| MIER3        | 1427.079 | 0.501572 | 0.143774 | 3.488627 | 0.000486 | 0.006148 |
| GTF3C3       | 1312.291 | 0.415389 | 0.119103 | 3.487641 | 0.000487 | 0.006166 |
| RHCE         | 29.98673 | -1.49013 | 0.42732  | -3.48717 | 0.000488 | 0.006172 |
| NUP88        | 1617.367 | 0.446467 | 0.128064 | 3.486293 | 0.00049  | 0.006187 |
| RNF138       | 855.7151 | 0.558704 | 0.160371 | 3.483824 | 0.000494 | 0.006239 |
| BMP1         | 693.8709 | -0.71923 | 0.20658  | -3.48162 | 0.000498 | 0.006286 |
| TATDN3       | 330.7532 | 0.518338 | 0.1489   | 3.481116 | 0.000499 | 0.006292 |
| RNF14        | 1541.742 | 0.394255 | 0.113296 | 3.479856 | 0.000502 | 0.006313 |
| SESN1        | 106.0525 | 0.759539 | 0.218272 | 3.479786 | 0.000502 | 0.006313 |
| RNGTT        | 1301.784 | 0.436163 | 0.125387 | 3.478542 | 0.000504 | 0.006338 |
| PNRC1        | 1461.47  | -0.51417 | 0.147831 | -3.47806 | 0.000505 | 0.006344 |
| INHBB        | 85.96542 | -0.92318 | 0.265481 | -3.4774  | 0.000506 | 0.006354 |
| SLC39A13     | 367.3939 | -0.94664 | 0.272387 | -3.47535 | 0.00051  | 0.006398 |
| LPAR2        | 53.42417 | -1.07404 | 0.309105 | -3.47468 | 0.000511 | 0.006404 |
| LEPROTL1     | 1165.919 | 0.472696 | 0.136041 | 3.474655 | 0.000512 | 0.006404 |
| LINC01116    | 462.9017 | -0.49113 | 0.141363 | -3.47426 | 0.000512 | 0.006408 |
| DNASE1L1     | 423.5449 | -0.92106 | 0.265191 | -3.47319 | 0.000514 | 0.006429 |
| FXN          | 223.9661 | 0.70014  | 0.2016   | 3.472916 | 0.000515 | 0.00643  |
| LOC100507156 | 412.5254 | -0.80108 | 0.230698 | -3.47243 | 0.000516 | 0.006437 |
| ID4          | 122.6555 | 0.789064 | 0.227275 | 3.471841 | 0.000517 | 0.006445 |
| DCAF13       | 2463.904 | 0.441288 | 0.127141 | 3.470842 | 0.000519 | 0.006464 |
| KIAA1524     | 1587.977 | 0.621405 | 0.179118 | 3.469251 | 0.000522 | 0.006497 |
| abcb10       | 1104.852 | 0.425419 | 0.122646 | 3.468671 | 0.000523 | 0.006506 |
| HSD3B7       | 247.5376 | -0.83174 | 0.239859 | -3.46764 | 0.000525 | 0.006526 |
| EPN2         | 446.5527 | -0.65868 | 0.19008  | -3.46529 | 0.00053  | 0.006578 |
| RFC5         | 860.1237 | 0.459878 | 0.132753 | 3.464164 | 0.000532 | 0.0066   |
| GLG1         | 7865.886 | -0.37014 | 0.106859 | -3.46381 | 0.000533 | 0.006604 |
| ACBD4        | 184.4112 | -0.98754 | 0.285174 | -3.46293 | 0.000534 | 0.00662  |
| FZD7         | 1752.889 | 0.411711 | 0.118974 | 3.460513 | 0.000539 | 0.006674 |
| ZDHH13       | 462.5677 | 0.597314 | 0.172672 | 3.459247 | 0.000542 | 0.0067   |
| YARS         | 3574.516 | 0.433192 | 0.125278 | 3.457846 | 0.000545 | 0.00673  |
| FBXO5        | 1119.783 | 0.508314 | 0.147069 | 3.456289 | 0.000548 | 0.006763 |
| RMND5A       | 1992.065 | 0.401088 | 0.116059 | 3.455881 | 0.000548 | 0.006768 |
| MAN1B1       | 1399.1   | -0.76896 | 0.222568 | -3.45493 | 0.00055  | 0.006787 |
| DCK          | 799.5094 | 0.462878 | 0.134068 | 3.452551 | 0.000555 | 0.006841 |
| SNTB2        | 4451.198 | 0.394215 | 0.114247 | 3.45056  | 0.000559 | 0.006885 |
| TDO2         | 63.93182 | 0.926582 | 0.268542 | 3.450417 | 0.00056  | 0.006885 |
| TOPBP1       | 3161.201 | 0.451155 | 0.130774 | 3.449876 | 0.000561 | 0.006891 |
| EFHD2        | 640.3566 | -0.57818 | 0.16761  | -3.44956 | 0.000562 | 0.006891 |
| rasa4        | 353.3583 | -0.84306 | 0.244399 | -3.44954 | 0.000562 | 0.006891 |
| MYL6B        | 965.9127 | -0.64624 | 0.18739  | -3.44865 | 0.000563 | 0.006908 |
| CCDC59       | 491.6627 | 0.464491 | 0.13471  | 3.448085 | 0.000565 | 0.006911 |
| TAGLN        | 58.04873 | -0.95865 | 0.278026 | -3.44807 | 0.000565 | 0.006911 |
| MRPL13       | 770.3451 | 0.451242 | 0.130875 | 3.447881 | 0.000565 | 0.006911 |
| FBXL16       | 227.8146 | -0.64031 | 0.185762 | -3.44694 | 0.000567 | 0.00693  |
| PLAU         | 809.1147 | 0.616506 | 0.178916 | 3.445792 | 0.000569 | 0.006954 |
| EPHA1        | 41.74774 | 1.144906 | 0.332371 | 3.444663 | 0.000572 | 0.006977 |

|              |          |          |          |          |          |          |
|--------------|----------|----------|----------|----------|----------|----------|
| YTHDF2       | 2329.594 | 0.37659  | 0.10934  | 3.444227 | 0.000573 | 0.006983 |
| ACSS1        | 220.641  | -0.72654 | 0.211053 | -3.44247 | 0.000576 | 0.007023 |
| NBN          | 2090.523 | 0.471714 | 0.137049 | 3.441927 | 0.000578 | 0.007032 |
| CALCRL       | 101.6136 | 1.352881 | 0.393092 | 3.441639 | 0.000578 | 0.007034 |
| fbIn7        | 314.2906 | -0.64866 | 0.188502 | -3.44116 | 0.000579 | 0.007036 |
| HS6ST3       | 705.6427 | -0.67929 | 0.197405 | -3.44111 | 0.000579 | 0.007036 |
| NPRL3        | 252.3265 | -0.67365 | 0.195821 | -3.44011 | 0.000581 | 0.007057 |
| DUT          | 1528.442 | 0.398433 | 0.11583  | 3.439818 | 0.000582 | 0.007059 |
| GRN          | 1943.604 | -0.88938 | 0.258752 | -3.43718 | 0.000588 | 0.007122 |
| CCNA2        | 3001.653 | 0.481156 | 0.140056 | 3.435455 | 0.000592 | 0.007162 |
| DENR         | 1467.322 | 0.480487 | 0.13991  | 3.434267 | 0.000594 | 0.007188 |
| 43711        | 392.2552 | 0.48002  | 0.139834 | 3.432789 | 0.000597 | 0.007222 |
| HAUS1        | 582.6188 | 0.537403 | 0.156587 | 3.431978 | 0.000599 | 0.007238 |
| MYRF         | 182.6129 | -0.69232 | 0.201784 | -3.43098 | 0.000601 | 0.007258 |
| 43526        | 134.2001 | -0.77086 | 0.22469  | -3.43079 | 0.000602 | 0.007258 |
| PA2G4P4      | 398.8599 | 0.505316 | 0.147343 | 3.42953  | 0.000605 | 0.007282 |
| DYNC1LI1     | 1184.606 | 0.407071 | 0.118698 | 3.429477 | 0.000605 | 0.007282 |
| TBC1D3C      | 355.4122 | -0.5593  | 0.163104 | -3.42913 | 0.000606 | 0.007283 |
| C14orf132    | 568.3235 | -0.46593 | 0.135878 | -3.42901 | 0.000606 | 0.007283 |
| mrc2         | 7318.888 | -0.86326 | 0.251854 | -3.42763 | 0.000609 | 0.007314 |
| ABCC5        | 809.6216 | 0.437329 | 0.127601 | 3.427308 | 0.00061  | 0.007316 |
| DNMT1        | 2833.817 | 0.44771  | 0.130636 | 3.427169 | 0.00061  | 0.007316 |
| PA2G4        | 2505.939 | 0.372631 | 0.108747 | 3.426587 | 0.000611 | 0.007326 |
| CENPL        | 485.5919 | 0.490522 | 0.143196 | 3.425518 | 0.000614 | 0.007339 |
| STAT1        | 3299.878 | 0.363668 | 0.106165 | 3.425489 | 0.000614 | 0.007339 |
| CALM2        | 11865.07 | 0.399316 | 0.116576 | 3.425382 | 0.000614 | 0.007339 |
| CENPK        | 1161.468 | 0.592075 | 0.172855 | 3.425263 | 0.000614 | 0.007339 |
| FNTB         | 257.7576 | -0.59668 | 0.174223 | -3.42483 | 0.000615 | 0.00734  |
| PLA2G6       | 108.8034 | -0.79954 | 0.233457 | -3.42477 | 0.000615 | 0.00734  |
| YEATS2       | 3807.93  | -0.36675 | 0.107116 | -3.42387 | 0.000617 | 0.007359 |
| WDYHV1       | 411.1013 | 0.487051 | 0.142274 | 3.423337 | 0.000619 | 0.007368 |
| ARG2         | 273.663  | 0.549504 | 0.16065  | 3.420496 | 0.000625 | 0.00744  |
| VBP1         | 1965.458 | 0.433723 | 0.126949 | 3.416507 | 0.000634 | 0.007544 |
| TMEM94       | 955.2598 | -0.79917 | 0.233945 | -3.41607 | 0.000635 | 0.00755  |
| ATP1B3       | 2210.354 | 0.397039 | 0.116309 | 3.413663 | 0.000641 | 0.007611 |
| VRK2         | 497.6011 | 0.53587  | 0.157134 | 3.410285 | 0.000649 | 0.0077   |
| MNS1         | 121.6232 | 0.830716 | 0.243682 | 3.409019 | 0.000652 | 0.00773  |
| TCEAL3       | 554.9894 | -0.45597 | 0.133809 | -3.40758 | 0.000655 | 0.007765 |
| RAD54L       | 855.6074 | 0.452266 | 0.132756 | 3.406742 | 0.000657 | 0.007783 |
| NENF         | 886.8679 | -0.51545 | 0.151334 | -3.40602 | 0.000659 | 0.007797 |
| TIPIN        | 274.3849 | 0.730819 | 0.214613 | 3.405289 | 0.000661 | 0.007812 |
| C5orf34      | 420.3558 | 0.501743 | 0.147352 | 3.405067 | 0.000661 | 0.007813 |
| POLR1E       | 1039.879 | 0.389551 | 0.114412 | 3.40481  | 0.000662 | 0.007814 |
| GGCX         | 873.7479 | -0.44778 | 0.131539 | -3.40417 | 0.000664 | 0.007826 |
| NOMO2        | 8265.099 | -0.37955 | 0.11153  | -3.40309 | 0.000666 | 0.007847 |
| LRRC40       | 1316.904 | 0.520103 | 0.152835 | 3.403036 | 0.000666 | 0.007847 |
| RPS16        | 1031.693 | -0.62232 | 0.182972 | -3.40116 | 0.000671 | 0.007888 |
| abca2        | 858.508  | -0.87183 | 0.256345 | -3.40102 | 0.000671 | 0.007888 |
| PSMA5        | 2955.414 | 0.372778 | 0.109609 | 3.400999 | 0.000671 | 0.007888 |
| LOC100506562 | 68.88107 | 0.919814 | 0.270531 | 3.40003  | 0.000674 | 0.007906 |

|          |          |          |          |          |          |          |
|----------|----------|----------|----------|----------|----------|----------|
| CHAF1A   | 1075.644 | 0.508369 | 0.149527 | 3.399853 | 0.000674 | 0.007906 |
| NEK3     | 258.9205 | 0.559287 | 0.164509 | 3.399734 | 0.000675 | 0.007906 |
| TMEM5    | 299.5949 | 0.572894 | 0.168528 | 3.399403 | 0.000675 | 0.00791  |
| NT5C3A   | 808.6672 | 0.521647 | 0.153466 | 3.39911  | 0.000676 | 0.007912 |
| RAB11B   | 160.2597 | -0.92796 | 0.273046 | -3.39855 | 0.000677 | 0.007922 |
| METTL18  | 225.4543 | 0.587845 | 0.17298  | 3.398344 | 0.000678 | 0.007922 |
| ZNF195   | 615.8441 | 0.596192 | 0.175482 | 3.397454 | 0.00068  | 0.007942 |
| NCAPG    | 2073.791 | 0.547967 | 0.161329 | 3.396571 | 0.000682 | 0.007962 |
| CRK      | 1472.139 | 0.382263 | 0.112579 | 3.395521 | 0.000685 | 0.007986 |
| znf526   | 303.8375 | -0.53594 | 0.157873 | -3.39474 | 0.000687 | 0.008003 |
| RNFT1    | 295.6006 | 0.520055 | 0.153204 | 3.394519 | 0.000687 | 0.008004 |
| SPOCK1   | 1200.118 | -0.71531 | 0.210762 | -3.39394 | 0.000689 | 0.008015 |
| GALNS    | 662.4957 | -0.54825 | 0.161561 | -3.39343 | 0.00069  | 0.008024 |
| IFI44    | 410.8329 | 0.475066 | 0.140025 | 3.392725 | 0.000692 | 0.008038 |
| USP6NL   | 402.1579 | 0.56003  | 0.165147 | 3.391095 | 0.000696 | 0.008079 |
| MTFP1    | 282.1297 | -0.73108 | 0.215597 | -3.39093 | 0.000697 | 0.008079 |
| SLC10A3  | 316.2018 | -0.77199 | 0.22772  | -3.39008 | 0.000699 | 0.008091 |
| MLPH     | 1172.247 | -0.61554 | 0.181581 | -3.38989 | 0.000699 | 0.008091 |
| TYW3     | 974.3635 | 0.498325 | 0.147027 | 3.389334 | 0.000701 | 0.008102 |
| NUPL2    | 607.8521 | 0.437081 | 0.129007 | 3.388041 | 0.000704 | 0.008132 |
| CCDC142  | 267.1914 | -0.63733 | 0.188119 | -3.38789 | 0.000704 | 0.008132 |
| RWDD1    | 625.7073 | 0.545653 | 0.16109  | 3.387245 | 0.000706 | 0.008145 |
| HSPA12A  | 287.8961 | 0.522039 | 0.15413  | 3.387009 | 0.000707 | 0.008146 |
| AP4E1    | 960.1457 | 0.547118 | 0.161669 | 3.384179 | 0.000714 | 0.008224 |
| SEMA4A   | 59.35154 | -1.09627 | 0.324019 | -3.38336 | 0.000716 | 0.008242 |
| MIR1204  | 32.09287 | 1.246096 | 0.368353 | 3.382881 | 0.000717 | 0.008244 |
| PRRT2    | 113.3126 | -1.03238 | 0.305193 | -3.38271 | 0.000718 | 0.008244 |
| OIP5     | 225.746  | 0.666806 | 0.197147 | 3.382272 | 0.000719 | 0.008251 |
| PRPS2    | 2208.678 | -0.45285 | 0.13392  | -3.38145 | 0.000721 | 0.008269 |
| FAM118B  | 490.1772 | 0.456921 | 0.135152 | 3.380786 | 0.000723 | 0.008283 |
| MCUR1    | 573.9929 | 0.483925 | 0.14318  | 3.379836 | 0.000725 | 0.008306 |
| TCHP     | 427.9105 | 0.462588 | 0.136895 | 3.379136 | 0.000727 | 0.008321 |
| ERI1     | 1144.512 | 0.448399 | 0.132721 | 3.378517 | 0.000729 | 0.008333 |
| NLRX1    | 233.4109 | -0.80081 | 0.237063 | -3.37805 | 0.00073  | 0.008341 |
| LSG1     | 1510.04  | 0.394283 | 0.116742 | 3.377389 | 0.000732 | 0.008351 |
| CEP162   | 270.1372 | 0.73223  | 0.216807 | 3.377328 | 0.000732 | 0.008351 |
| TRIM26   | 687.3854 | 0.440478 | 0.130458 | 3.376382 | 0.000734 | 0.008374 |
| CALCOCO1 | 1171.335 | -0.60936 | 0.180594 | -3.37422 | 0.00074  | 0.008433 |
| CHKA     | 872.9865 | 0.403927 | 0.119743 | 3.373282 | 0.000743 | 0.008456 |
| ADGRE5   | 639.902  | -0.56879 | 0.168631 | -3.37297 | 0.000744 | 0.008459 |
| TERF1    | 872.2543 | 0.504461 | 0.149569 | 3.372753 | 0.000744 | 0.00846  |
| MATR3    | 11842.29 | 0.446854 | 0.132507 | 3.372299 | 0.000745 | 0.008467 |
| CHD1     | 3098.518 | 0.529619 | 0.157095 | 3.371332 | 0.000748 | 0.008491 |
| GUSBP2   | 653.9848 | -0.4747  | 0.140855 | -3.37012 | 0.000751 | 0.008522 |
| MTAP     | 1303.162 | 0.45815  | 0.136036 | 3.367855 | 0.000758 | 0.008582 |
| LAP3     | 1243.913 | 0.408474 | 0.121289 | 3.367781 | 0.000758 | 0.008582 |
| TNNT1    | 640.5988 | -0.78673 | 0.233623 | -3.36753 | 0.000758 | 0.008584 |
| SLC35F2  | 931.242  | 0.437485 | 0.129985 | 3.365652 | 0.000764 | 0.008631 |
| FKBP3    | 500.8349 | 0.508636 | 0.151128 | 3.365599 | 0.000764 | 0.008631 |
| WASH5P   | 467.9653 | -0.50777 | 0.150892 | -3.36515 | 0.000765 | 0.008639 |

|              |          |          |          |          |          |          |
|--------------|----------|----------|----------|----------|----------|----------|
| LAMB2P1      | 50.60478 | -1.11504 | 0.331465 | -3.36398 | 0.000768 | 0.008669 |
| SLC12A2      | 1252.494 | 0.431104 | 0.128243 | 3.361624 | 0.000775 | 0.008737 |
| SMCHD1       | 4148.799 | 0.480112 | 0.14283  | 3.361433 | 0.000775 | 0.008737 |
| THBS3        | 401.2966 | -0.5656  | 0.168286 | -3.36094 | 0.000777 | 0.008746 |
| LYN          | 1199.23  | 0.397645 | 0.118423 | 3.357832 | 0.000786 | 0.008839 |
| ZNF93        | 281.3208 | 0.595534 | 0.177377 | 3.357446 | 0.000787 | 0.008843 |
| natd1        | 123.3294 | -0.73044 | 0.217569 | -3.35729 | 0.000787 | 0.008843 |
| CCDC150      | 207.2361 | 0.796923 | 0.237498 | 3.355491 | 0.000792 | 0.008894 |
| PDGFD        | 6401.766 | -0.44255 | 0.132037 | -3.35173 | 0.000803 | 0.009006 |
| NDUFAF6      | 224.0048 | 0.585293 | 0.174629 | 3.351642 | 0.000803 | 0.009006 |
| CEP55        | 1724.547 | 0.541478 | 0.161585 | 3.351043 | 0.000805 | 0.009019 |
| NLRP1        | 488.7181 | -0.49086 | 0.1465   | -3.3506  | 0.000806 | 0.009022 |
| CACNB1       | 177.7162 | -0.68194 | 0.203531 | -3.35056 | 0.000806 | 0.009022 |
| TMX2         | 2042.197 | 0.365119 | 0.108993 | 3.349946 | 0.000808 | 0.009035 |
| HLA-H        | 1625.344 | -0.92227 | 0.275365 | -3.34928 | 0.00081  | 0.00905  |
| ATR          | 3170.704 | 0.536258 | 0.160167 | 3.348126 | 0.000814 | 0.009081 |
| SOX4         | 1886.466 | 0.403387 | 0.120502 | 3.347545 | 0.000815 | 0.009094 |
| TPM2         | 4625.552 | -0.51776 | 0.154682 | -3.34729 | 0.000816 | 0.009096 |
| GALNT1       | 2081.683 | 0.415805 | 0.124277 | 3.345783 | 0.000821 | 0.009139 |
| PADI3        | 333.3426 | -0.61412 | 0.183569 | -3.34543 | 0.000822 | 0.009144 |
| WDR43        | 2106.099 | 0.463688 | 0.138666 | 3.343928 | 0.000826 | 0.009187 |
| ERH          | 1512.327 | 0.394921 | 0.11811  | 3.343682 | 0.000827 | 0.009188 |
| SEC13        | 3175.434 | -0.54081 | 0.161758 | -3.34335 | 0.000828 | 0.009189 |
| PSMD14       | 2564.988 | 0.479024 | 0.143281 | 3.343247 | 0.000828 | 0.009189 |
| LSM5         | 1040.406 | 0.469469 | 0.140434 | 3.342979 | 0.000829 | 0.009192 |
| PHF14        | 2426.43  | 0.435571 | 0.13033  | 3.342053 | 0.000832 | 0.009215 |
| ILF2         | 4667.524 | 0.363102 | 0.108661 | 3.34161  | 0.000833 | 0.009215 |
| MIER2        | 270.4107 | -0.79841 | 0.238972 | -3.34103 | 0.000835 | 0.009215 |
| IGFBP1       | 349.6875 | -0.80443 | 0.240784 | -3.34089 | 0.000835 | 0.009215 |
| ARHGEF37     | 54.39463 | -1.03098 | 0.308609 | -3.34072 | 0.000836 | 0.009215 |
| ERCC8        | 589.5863 | 0.469172 | 0.140453 | 3.340412 | 0.000837 | 0.009215 |
| COQ3         | 202.6315 | 0.689678 | 0.206468 | 3.340357 | 0.000837 | 0.009215 |
| LOC100294362 | 124.5932 | -0.69153 | 0.207028 | -3.3403  | 0.000837 | 0.009215 |
| GADD45B      | 506.3176 | -0.45984 | 0.137666 | -3.34028 | 0.000837 | 0.009215 |
| TMEM97       | 1460.944 | 0.430715 | 0.128998 | 3.33892  | 0.000841 | 0.009254 |
| PPP1R3G      | 11.27625 | -2.18689 | 0.655076 | -3.33838 | 0.000843 | 0.009265 |
| ZNF521       | 1333.601 | -0.40651 | 0.121804 | -3.33739 | 0.000846 | 0.009292 |
| RNMT         | 1797.977 | -0.50022 | 0.149899 | -3.33708 | 0.000847 | 0.009296 |
| KCNJ2        | 68.6443  | 0.918877 | 0.275471 | 3.335658 | 0.000851 | 0.009337 |
| MRPS31       | 541.8603 | 0.473874 | 0.142111 | 3.334539 | 0.000854 | 0.009368 |
| TUBB3        | 1056.01  | -0.78503 | 0.235503 | -3.3334  | 0.000858 | 0.009397 |
| fastkd3      | 353.7426 | 0.482181 | 0.144657 | 3.333264 | 0.000858 | 0.009397 |
| LINC01002    | 28.63077 | -1.39927 | 0.420064 | -3.3311  | 0.000865 | 0.009464 |
| ARMC1        | 2444.92  | 0.435312 | 0.130713 | 3.330285 | 0.000868 | 0.009485 |
| CAMTA2       | 425.7898 | -0.56743 | 0.170412 | -3.32977 | 0.000869 | 0.009496 |
| c11orf95     | 404.9812 | 0.450693 | 0.13537  | 3.32935  | 0.00087  | 0.009498 |
| POLB         | 460.2813 | 0.470105 | 0.141202 | 3.329305 | 0.000871 | 0.009498 |
| SNORD102     | 92.11695 | 0.855788 | 0.257087 | 3.328781 | 0.000872 | 0.009509 |
| PSMA2        | 4293.022 | 0.376675 | 0.113173 | 3.328323 | 0.000874 | 0.009512 |
| MEX3A        | 497.3297 | 0.466539 | 0.140173 | 3.328304 | 0.000874 | 0.009512 |

|           |          |          |          |          |          |          |
|-----------|----------|----------|----------|----------|----------|----------|
| HELLS     | 1092.28  | 0.75998  | 0.228397 | 3.327447 | 0.000876 | 0.009535 |
| TSPAN3    | 3434.65  | 0.375745 | 0.11293  | 3.327226 | 0.000877 | 0.009536 |
| KMT2D     | 1588.959 | -0.52208 | 0.157017 | -3.32501 | 0.000884 | 0.009605 |
| FAM3A     | 336.6924 | -0.80756 | 0.242957 | -3.32387 | 0.000888 | 0.009638 |
| CEBPZ     | 2117.348 | 0.426075 | 0.128195 | 3.323657 | 0.000888 | 0.009638 |
| RHOBTB1   | 834.9985 | -0.42104 | 0.126793 | -3.32074 | 0.000898 | 0.009724 |
| CD1D      | 386.358  | -0.55386 | 0.1668   | -3.32048 | 0.000899 | 0.009724 |
| KRR1      | 857.7692 | 0.482041 | 0.145173 | 3.320452 | 0.000899 | 0.009724 |
| CHEK1     | 1052.934 | 0.487742 | 0.146892 | 3.320413 | 0.000899 | 0.009724 |
| SSR4      | 1595.028 | -0.66258 | 0.199648 | -3.31873 | 0.000904 | 0.009775 |
| SPANXC    | 141.559  | -0.84122 | 0.253507 | -3.31832 | 0.000906 | 0.009779 |
| UTP18     | 1677.79  | 0.42946  | 0.129424 | 3.318247 | 0.000906 | 0.009779 |
| MRPS35    | 1507.069 | 0.415888 | 0.125378 | 3.317073 | 0.00091  | 0.009808 |
| PAIP1     | 1256.432 | 0.410278 | 0.123689 | 3.317017 | 0.00091  | 0.009808 |
| MFS12     | 386.7774 | -0.73894 | 0.222819 | -3.31634 | 0.000912 | 0.00982  |
| TRO       | 480.8702 | -0.75554 | 0.227829 | -3.31628 | 0.000912 | 0.00982  |
| DUOX1     | 64.10801 | -0.9306  | 0.280737 | -3.31484 | 0.000917 | 0.00986  |
| RPL22L1   | 344.0884 | 0.545718 | 0.164633 | 3.314753 | 0.000917 | 0.00986  |
| SEC61A1   | 6521.184 | -0.41217 | 0.124358 | -3.31441 | 0.000918 | 0.009863 |
| SERINC4   | 182.4304 | -0.66522 | 0.200711 | -3.3143  | 0.000919 | 0.009863 |
| WDR3      | 2867.709 | 0.438163 | 0.132213 | 3.314063 | 0.00092  | 0.009864 |
| DBF4      | 1882.199 | 0.528084 | 0.159411 | 3.312722 | 0.000924 | 0.009905 |
| PPM1G     | 1866.104 | 0.407727 | 0.123111 | 3.311862 | 0.000927 | 0.009928 |
| ZNF551    | 267.6358 | 0.59792  | 0.180569 | 3.311314 | 0.000929 | 0.009941 |
| ARHGAP22  | 175.96   | -0.66326 | 0.200432 | -3.30913 | 0.000936 | 0.010012 |
| PPA1      | 1807.823 | 0.404133 | 0.122192 | 3.307349 | 0.000942 | 0.010069 |
| NUP35     | 380.0548 | 0.600239 | 0.181574 | 3.305751 | 0.000947 | 0.010119 |
| DKC1      | 2191.868 | 0.403245 | 0.122023 | 3.304672 | 0.000951 | 0.010151 |
| SNTB1     | 945.5723 | -0.42412 | 0.128352 | -3.30432 | 0.000952 | 0.010152 |
| ALAS1     | 1732.721 | 0.390524 | 0.118187 | 3.304277 | 0.000952 | 0.010152 |
| PRELID3B  | 4004.667 | 0.378947 | 0.114692 | 3.304031 | 0.000953 | 0.010153 |
| GGT7      | 494.8536 | -0.71821 | 0.217448 | -3.3029  | 0.000957 | 0.010187 |
| VAMP2     | 306.0474 | -0.52641 | 0.159535 | -3.29965 | 0.000968 | 0.010299 |
| FPR3      | 28.01569 | -1.46466 | 0.444077 | -3.29822 | 0.000973 | 0.010342 |
| ZNF37BP   | 734.681  | 0.548323 | 0.166255 | 3.298094 | 0.000973 | 0.010342 |
| LOC440300 | 421.964  | -0.54705 | 0.165889 | -3.29766 | 0.000975 | 0.010351 |
| setmar    | 218.377  | 0.661606 | 0.20065  | 3.297308 | 0.000976 | 0.010353 |
| TRAF3IP2  | 616.6851 | -0.43294 | 0.131305 | -3.29722 | 0.000976 | 0.010353 |
| FAM127A   | 1406.038 | -0.62558 | 0.189745 | -3.29697 | 0.000977 | 0.010353 |
| ABCE1     | 3927.524 | 0.456226 | 0.138383 | 3.296833 | 0.000978 | 0.010353 |
| TMEM198B  | 130.3372 | -0.69866 | 0.211997 | -3.2956  | 0.000982 | 0.010391 |
| TOM1      | 536.2537 | -0.81111 | 0.246151 | -3.29517 | 0.000984 | 0.010399 |
| POLR2B    | 4161.049 | 0.383476 | 0.116387 | 3.294846 | 0.000985 | 0.010399 |
| ercc1     | 919.2246 | -0.51977 | 0.157754 | -3.29482 | 0.000985 | 0.010399 |
| RRP1B     | 1955.377 | 0.350383 | 0.106365 | 3.294171 | 0.000987 | 0.010406 |
| LAMB2     | 1677.706 | -0.81671 | 0.247929 | -3.29413 | 0.000987 | 0.010406 |
| ILVBL     | 493.4303 | -0.6644  | 0.201697 | -3.29404 | 0.000988 | 0.010406 |
| LYPLA1    | 3294.023 | 0.38075  | 0.115632 | 3.292782 | 0.000992 | 0.010446 |
| TRPM4     | 109.1683 | -0.90277 | 0.274196 | -3.29242 | 0.000993 | 0.010452 |
| AFAP1     | 1059.997 | -0.40195 | 0.12214  | -3.29084 | 0.000999 | 0.010504 |

|          |          |          |          |          |          |          |
|----------|----------|----------|----------|----------|----------|----------|
| SOAT1    | 2039.308 | 0.465155 | 0.141406 | 3.2895   | 0.001004 | 0.010546 |
| SMIM13   | 913.459  | 0.431956 | 0.13132  | 3.289335 | 0.001004 | 0.010546 |
| TSNAX    | 948.1371 | 0.45028  | 0.136931 | 3.288379 | 0.001008 | 0.010575 |
| SKA3     | 767.2911 | 0.51726  | 0.157326 | 3.287832 | 0.00101  | 0.010588 |
| SUPT16H  | 3575.904 | 0.424308 | 0.129103 | 3.286597 | 0.001014 | 0.010627 |
| ZNF695   | 103.9417 | 0.702689 | 0.213934 | 3.284604 | 0.001021 | 0.010684 |
| CLIP3    | 122.0922 | -0.75204 | 0.228964 | -3.28452 | 0.001022 | 0.010684 |
| lyrm7    | 1508.952 | 0.405152 | 0.123444 | 3.282075 | 0.00103  | 0.01077  |
| KDELR1   | 2861.758 | -0.52963 | 0.161438 | -3.28067 | 0.001036 | 0.010816 |
| HIBCH    | 499.746  | 0.477751 | 0.145653 | 3.280072 | 0.001038 | 0.010832 |
| PRIMPOL  | 534.7896 | 0.539138 | 0.164379 | 3.279857 | 0.001039 | 0.010833 |
| TARBP1   | 2486.259 | 0.440079 | 0.13419  | 3.279517 | 0.00104  | 0.010839 |
| ALPK2    | 4409.713 | 0.393702 | 0.120061 | 3.279178 | 0.001041 | 0.010844 |
| CENPP    | 132.9413 | 0.770871 | 0.235224 | 3.277175 | 0.001049 | 0.010914 |
| ST3GAL6  | 234.8619 | 0.609586 | 0.186039 | 3.276654 | 0.00105  | 0.010927 |
| VAV3     | 572.7986 | 0.663158 | 0.202437 | 3.275879 | 0.001053 | 0.01095  |
| PTPRU    | 845.8368 | -0.70481 | 0.215193 | -3.27526 | 0.001056 | 0.010967 |
| LAYN     | 1337.145 | -0.40589 | 0.123965 | -3.27422 | 0.00106  | 0.010997 |
| BIVM     | 1735.957 | 0.412568 | 0.126019 | 3.273856 | 0.001061 | 0.010997 |
| CHCHD4   | 403.5344 | 0.488115 | 0.149101 | 3.273717 | 0.001061 | 0.010997 |
| ARHGAP42 | 863.3367 | 0.387045 | 0.118237 | 3.273458 | 0.001062 | 0.011    |
| SAP30L   | 1106.763 | 0.413717 | 0.126396 | 3.273173 | 0.001063 | 0.011003 |
| REEP1    | 68.1465  | 0.893652 | 0.273115 | 3.272074 | 0.001068 | 0.011036 |
| TCTN2    | 641.408  | -0.42303 | 0.12929  | -3.27195 | 0.001068 | 0.011036 |
| PMS1     | 707.5114 | 0.524528 | 0.160404 | 3.270038 | 0.001075 | 0.011104 |
| CENPH    | 1152.941 | 0.44593  | 0.136403 | 3.269206 | 0.001078 | 0.011128 |
| CKAP4    | 7595.878 | -0.34081 | 0.104253 | -3.26903 | 0.001079 | 0.011128 |
| CMC2     | 539.2023 | 0.507482 | 0.155274 | 3.268308 | 0.001082 | 0.011149 |
| EXO5     | 53.21884 | 0.939679 | 0.287596 | 3.267358 | 0.001086 | 0.011179 |
| ZNF92    | 550.6969 | 0.551771 | 0.168886 | 3.267117 | 0.001086 | 0.011181 |
| SNORD56  | 16.73992 | 1.672447 | 0.512018 | 3.266383 | 0.001089 | 0.011201 |
| TMED1    | 342.1117 | -0.81231 | 0.2487   | -3.26622 | 0.00109  | 0.011201 |
| HS6ST1   | 784.2372 | -0.63246 | 0.193647 | -3.26605 | 0.001091 | 0.011201 |
| HEXIM2   | 42.80856 | -1.14991 | 0.352143 | -3.26545 | 0.001093 | 0.011215 |
| ATP5F1   | 4516.413 | 0.363129 | 0.111208 | 3.265318 | 0.001093 | 0.011215 |
| VPS28    | 389.9522 | -0.66389 | 0.203365 | -3.26454 | 0.001096 | 0.011239 |
| TATDN1   | 534.4711 | 0.477297 | 0.146221 | 3.264209 | 0.001098 | 0.011244 |
| PSPC1    | 1155.055 | 0.405335 | 0.124214 | 3.263207 | 0.001102 | 0.011275 |
| RELA     | 961.429  | -0.61977 | 0.189936 | -3.26307 | 0.001102 | 0.011275 |
| CES1P2   | 48.39034 | 1.39592  | 0.427826 | 3.26282  | 0.001103 | 0.011277 |
| SDHB     | 1677.964 | 0.362337 | 0.111104 | 3.261249 | 0.001109 | 0.011332 |
| IZUMO4   | 27.89193 | -1.27575 | 0.391205 | -3.26107 | 0.00111  | 0.011332 |
| FANCL    | 710.4011 | 0.514307 | 0.157737 | 3.260536 | 0.001112 | 0.011346 |
| COQ2     | 414.8265 | 0.533855 | 0.163741 | 3.260355 | 0.001113 | 0.011346 |
| COL16A1  | 954.9312 | -0.66926 | 0.205393 | -3.25842 | 0.00112  | 0.011408 |
| CD109    | 4068.591 | -0.58251 | 0.178771 | -3.25842 | 0.00112  | 0.011408 |
| LRPPRC   | 6212.62  | 0.444756 | 0.136511 | 3.258017 | 0.001122 | 0.011411 |
| abl1     | 1635.388 | -0.50497 | 0.154995 | -3.25797 | 0.001122 | 0.011411 |
| P3H2     | 4150.42  | -0.3481  | 0.106896 | -3.25648 | 0.001128 | 0.011454 |
| MRPL46   | 401.7135 | 0.464826 | 0.142742 | 3.256403 | 0.001128 | 0.011454 |

|          |          |          |          |          |          |          |
|----------|----------|----------|----------|----------|----------|----------|
| CENPQ    | 485.6544 | 0.467969 | 0.143709 | 3.256358 | 0.001129 | 0.011454 |
| C11orf45 | 67.94832 | -0.91521 | 0.281096 | -3.25587 | 0.00113  | 0.011466 |
| GLCE     | 1283.38  | 0.390874 | 0.120062 | 3.255601 | 0.001132 | 0.011469 |
| SRRM2    | 7842.235 | -0.43411 | 0.133352 | -3.25538 | 0.001132 | 0.01147  |
| SNRPE    | 1120.306 | 0.450503 | 0.138429 | 3.254407 | 0.001136 | 0.011502 |
| NCBP3    | 1244.988 | 0.399807 | 0.122865 | 3.254032 | 0.001138 | 0.01151  |
| MTOR     | 3055.984 | 0.37092  | 0.114018 | 3.253173 | 0.001141 | 0.011537 |
| SLC2A10  | 2370.087 | -0.47652 | 0.146568 | -3.25117 | 0.001149 | 0.011602 |
| FTSJ1    | 677.1353 | -0.49711 | 0.152907 | -3.25104 | 0.00115  | 0.011602 |
| MAT2B    | 2469.667 | 0.350289 | 0.107747 | 3.25103  | 0.00115  | 0.011602 |
| SLC27A3  | 94.70918 | -0.9417  | 0.289699 | -3.2506  | 0.001152 | 0.011604 |
| DDX10    | 1592.842 | 0.446118 | 0.137242 | 3.250598 | 0.001152 | 0.011604 |
| SRPK1    | 5967.58  | 0.392184 | 0.120703 | 3.249175 | 0.001157 | 0.011652 |
| PDIA3    | 10387    | -0.39592 | 0.121856 | -3.24904 | 0.001158 | 0.011652 |
| MXRA5    | 79.55937 | -0.90009 | 0.277047 | -3.24887 | 0.001159 | 0.011652 |
| SCYL2    | 1533.636 | 0.453236 | 0.139553 | 3.247772 | 0.001163 | 0.011673 |
| tmem70   | 567.7096 | 0.453451 | 0.13962  | 3.247745 | 0.001163 | 0.011673 |
| VANGL1   | 1684.506 | 0.374053 | 0.115177 | 3.247626 | 0.001164 | 0.011673 |
| Ppial4g  | 61.7688  | 0.870856 | 0.268171 | 3.247388 | 0.001165 | 0.011675 |
| SET      | 9460.687 | 0.368774 | 0.113577 | 3.246901 | 0.001167 | 0.011687 |
| ZNF280C  | 581.6075 | 0.510781 | 0.15735  | 3.246148 | 0.00117  | 0.011709 |
| FAM160B2 | 615.7617 | -0.74838 | 0.230553 | -3.246   | 0.00117  | 0.011709 |
| JMJD6    | 1105.187 | -0.43889 | 0.135219 | -3.24576 | 0.001171 | 0.011711 |
| POLR2K   | 1105.343 | 0.421902 | 0.13     | 3.245405 | 0.001173 | 0.011712 |
| TM9SF4   | 3012.421 | -0.4102  | 0.126396 | -3.24539 | 0.001173 | 0.011712 |
| LRRK1    | 1120.492 | -0.39672 | 0.122255 | -3.24503 | 0.001174 | 0.011719 |
| UBXN6    | 738.3778 | -0.70218 | 0.216412 | -3.24466 | 0.001176 | 0.011726 |
| SF3A3    | 2507.186 | 0.386908 | 0.119262 | 3.244189 | 0.001178 | 0.011733 |
| HSPBAP1  | 111.5279 | 0.70932  | 0.218656 | 3.243996 | 0.001179 | 0.011733 |
| PLSCR1   | 869.2666 | 0.392959 | 0.121136 | 3.243946 | 0.001179 | 0.011733 |
| UPF3B    | 452.5191 | 0.544783 | 0.167982 | 3.243096 | 0.001182 | 0.011753 |
| TTC7A    | 723.9799 | -0.57437 | 0.177137 | -3.24254 | 0.001185 | 0.011768 |
| ZNF878   | 27.6088  | 1.284319 | 0.396108 | 3.242348 | 0.001185 | 0.011769 |
| IGF1R    | 1558.656 | -0.45259 | 0.139609 | -3.24184 | 0.001188 | 0.011782 |
| VEGFB    | 1068.348 | -0.48665 | 0.150126 | -3.24165 | 0.001188 | 0.011783 |
| DFNA5    | 1511.578 | -0.37289 | 0.115095 | -3.23983 | 0.001196 | 0.01185  |
| KDM5B    | 3876.126 | -0.38588 | 0.119127 | -3.23922 | 0.001199 | 0.011868 |
| SLC38A1  | 6464.52  | 0.425072 | 0.131269 | 3.238164 | 0.001203 | 0.011904 |
| TIMM8A   | 280.8297 | 0.553716 | 0.171007 | 3.237973 | 0.001204 | 0.011905 |
| WASF2    | 1682.77  | -0.36555 | 0.112922 | -3.23716 | 0.001207 | 0.011931 |
| CISD1    | 542.3838 | 0.452382 | 0.139756 | 3.236932 | 0.001208 | 0.011933 |
| MIR616   | 32.24392 | 1.150142 | 0.355351 | 3.236634 | 0.001209 | 0.011938 |
| OLA1     | 4473.647 | 0.439051 | 0.135673 | 3.236104 | 0.001212 | 0.011952 |
| CYB5D2   | 282.8802 | -0.54233 | 0.167656 | -3.23476 | 0.001217 | 0.012001 |
| SLC17A5  | 657.6137 | -0.72622 | 0.224523 | -3.23452 | 0.001218 | 0.012003 |
| UBA2     | 4251.909 | 0.393638 | 0.121721 | 3.233936 | 0.001221 | 0.012019 |
| SMAD3    | 9798.041 | -0.47133 | 0.145753 | -3.23379 | 0.001222 | 0.012019 |
| TUBGCP2  | 818.1378 | -0.54954 | 0.16998  | -3.23295 | 0.001225 | 0.012046 |
| nomo3    | 8059.863 | -0.35251 | 0.109052 | -3.23249 | 0.001227 | 0.012057 |
| OTUD6B   | 674.3137 | 0.559623 | 0.173132 | 3.232344 | 0.001228 | 0.012057 |

|              |          |          |          |          |          |          |
|--------------|----------|----------|----------|----------|----------|----------|
| CBX1         | 2802.957 | 0.361402 | 0.111856 | 3.230954 | 0.001234 | 0.012108 |
| PCAT6        | 20.27385 | -1.57569 | 0.48794  | -3.22926 | 0.001241 | 0.012172 |
| DUSP5        | 475.3707 | 0.482164 | 0.149391 | 3.227521 | 0.001249 | 0.012239 |
| CFAP97       | 2622.654 | 0.404498 | 0.125336 | 3.227309 | 0.00125  | 0.01224  |
| SETBP1       | 316.4289 | -0.4813  | 0.149143 | -3.22712 | 0.00125  | 0.01224  |
| FAM92A       | 762.8952 | 0.442219 | 0.137047 | 3.226775 | 0.001252 | 0.012247 |
| LENG9        | 28.65784 | -1.31916 | 0.408853 | -3.2265  | 0.001253 | 0.012251 |
| LOC100294145 | 652.8815 | 0.481787 | 0.149393 | 3.224972 | 0.00126  | 0.012309 |
| ZNF275       | 814.008  | -0.4004  | 0.124175 | -3.22452 | 0.001262 | 0.012319 |
| TMX4         | 1324.595 | 0.433381 | 0.134408 | 3.224381 | 0.001262 | 0.012319 |
| NUP50        | 2548.173 | 0.460805 | 0.142997 | 3.22247  | 0.001271 | 0.012394 |
| RGMB-AS1     | 83.9454  | -0.87002 | 0.270021 | -3.22205 | 0.001273 | 0.012404 |
| C5ORF22      | 988.5102 | 0.47119  | 0.146252 | 3.221765 | 0.001274 | 0.012408 |
| TIMP1        | 1339.005 | -0.78106 | 0.2426   | -3.21954 | 0.001284 | 0.012497 |
| ADAT1        | 681.8373 | 0.46234  | 0.143622 | 3.219135 | 0.001286 | 0.0125   |
| CDK5RAP3     | 2166.574 | -0.53237 | 0.165377 | -3.21912 | 0.001286 | 0.0125   |
| TBK1         | 1365.793 | 0.402031 | 0.124911 | 3.218539 | 0.001288 | 0.012517 |
| HPCAL1       | 1557.285 | -0.62595 | 0.194505 | -3.21815 | 0.00129  | 0.012524 |
| TSSK3        | 196.689  | -0.58852 | 0.182899 | -3.21774 | 0.001292 | 0.012524 |
| MMP25        | 41.23475 | -1.06996 | 0.332526 | -3.21766 | 0.001292 | 0.012524 |
| AZIN1        | 6153.605 | 0.383333 | 0.119145 | 3.217357 | 0.001294 | 0.01253  |
| EIF2S1       | 2178.927 | 0.436341 | 0.135649 | 3.216689 | 0.001297 | 0.012546 |
| RBMX         | 6599.72  | 0.394914 | 0.122781 | 3.216419 | 0.001298 | 0.012546 |
| MT1IP        | 23.85432 | -1.57459 | 0.489568 | -3.21629 | 0.001299 | 0.012546 |
| LOC100507564 | 257.2877 | 0.543768 | 0.169078 | 3.216087 | 0.0013   | 0.012546 |
| CEP97        | 1289.274 | 0.464549 | 0.144449 | 3.216004 | 0.0013   | 0.012546 |
| RASSF7       | 250.0636 | -1.05228 | 0.327212 | -3.21591 | 0.0013   | 0.012546 |
| GOT2         | 3229.423 | 0.34586  | 0.107565 | 3.215354 | 0.001303 | 0.012562 |
| NOC3L        | 1170.729 | 0.473016 | 0.147194 | 3.213554 | 0.001311 | 0.012626 |
| PPAT         | 1134.027 | 0.439355 | 0.13672  | 3.213531 | 0.001311 | 0.012626 |
| IGSF9B       | 95.77858 | -0.74894 | 0.233172 | -3.21198 | 0.001318 | 0.012687 |
| FAM214B      | 430.0423 | -0.62881 | 0.195818 | -3.2112  | 0.001322 | 0.012713 |
| FECH         | 1526.418 | 0.354875 | 0.110526 | 3.210773 | 0.001324 | 0.012724 |
| DPH3         | 595.1503 | 0.497153 | 0.15485  | 3.210542 | 0.001325 | 0.012727 |
| NSL1         | 1511.644 | 0.400749 | 0.124835 | 3.210233 | 0.001326 | 0.01273  |
| GALK2        | 1058.608 | -0.41697 | 0.129894 | -3.2101  | 0.001327 | 0.01273  |
| HSPA6        | 28.01365 | -1.23826 | 0.385775 | -3.20979 | 0.001328 | 0.012736 |
| UTP20        | 2210.508 | 0.488658 | 0.15227  | 3.209162 | 0.001331 | 0.012756 |
| DDX3X        | 5274.836 | 0.405361 | 0.126371 | 3.207719 | 0.001338 | 0.012812 |
| LOC100133331 | 75.38867 | -0.91908 | 0.286659 | -3.20617 | 0.001345 | 0.012873 |
| TMEM209      | 1321.174 | 0.438809 | 0.136872 | 3.205988 | 0.001346 | 0.012874 |
| ROBO3        | 391.2062 | -0.51265 | 0.159917 | -3.20571 | 0.001347 | 0.012878 |
| IFNGR1       | 966.4533 | 0.472091 | 0.147297 | 3.205032 | 0.00135  | 0.012901 |
| PAQR3        | 698.8808 | 0.448175 | 0.139848 | 3.204726 | 0.001352 | 0.012906 |
| ATP11C       | 2384.96  | 0.403122 | 0.12582  | 3.203971 | 0.001355 | 0.012932 |
| ECE1         | 1745.135 | -0.57879 | 0.180668 | -3.20359 | 0.001357 | 0.012937 |
| DYRK1B       | 111.1877 | -0.78633 | 0.245458 | -3.20352 | 0.001358 | 0.012937 |
| STX18        | 422.2007 | 0.478468 | 0.149414 | 3.202304 | 0.001363 | 0.012979 |
| CASP8AP2     | 1356.554 | 0.540512 | 0.168793 | 3.202212 | 0.001364 | 0.012979 |
| APOL6        | 2959.763 | 0.365294 | 0.114092 | 3.201757 | 0.001366 | 0.012992 |



|          |          |          |          |          |          |          |
|----------|----------|----------|----------|----------|----------|----------|
| TEFM     | 334.1685 | 0.567394 | 0.177287 | 3.200421 | 0.001372 | 0.013036 |
| PARP1    | 4781.11  | 0.384851 | 0.120276 | 3.199733 | 0.001376 | 0.013059 |
| GLUL     | 5340.054 | -0.53551 | 0.167383 | -3.19932 | 0.001378 | 0.01307  |
| MYL6     | 7613.784 | -0.39582 | 0.123729 | -3.19908 | 0.001379 | 0.013073 |
| EEF1A2   | 353.8599 | -0.78054 | 0.244006 | -3.19883 | 0.00138  | 0.013076 |
| SBDSP1   | 377.8405 | 0.536233 | 0.167678 | 3.197994 | 0.001384 | 0.013106 |
| SKA1     | 511.1191 | 0.590941 | 0.18483  | 3.197222 | 0.001388 | 0.013133 |
| GTF2I    | 11646.91 | 0.346909 | 0.108626 | 3.193606 | 0.001405 | 0.013291 |
| NDUFAB1  | 1125.5   | 0.396677 | 0.124217 | 3.19342  | 0.001406 | 0.013291 |
| UHRF1BP1 | 1332.366 | 0.385918 | 0.120857 | 3.193172 | 0.001407 | 0.013294 |
| SCO1     | 842.5014 | 0.452452 | 0.141704 | 3.192931 | 0.001408 | 0.013297 |
| AKR1C4   | 112.7166 | 0.691005 | 0.216458 | 3.192332 | 0.001411 | 0.013317 |
| AIMP2    | 264.292  | 0.608612 | 0.190709 | 3.191312 | 0.001416 | 0.013356 |
| coa6     | 757.3154 | 0.444939 | 0.139458 | 3.190495 | 0.00142  | 0.013385 |
| KLF4     | 64.32228 | 0.928908 | 0.291222 | 3.189692 | 0.001424 | 0.0134   |
| XPO1     | 9350.622 | 0.454842 | 0.142606 | 3.189504 | 0.001425 | 0.0134   |
| WHRN     | 99.74984 | -0.84777 | 0.265801 | -3.1895  | 0.001425 | 0.0134   |
| NDC1     | 2881.246 | 0.461985 | 0.144847 | 3.189466 | 0.001425 | 0.0134   |
| PLD3     | 1200.833 | -0.85102 | 0.266867 | -3.18892 | 0.001428 | 0.013418 |
| ADAMTS13 | 27.73389 | -1.21977 | 0.382543 | -3.18857 | 0.00143  | 0.013425 |
| MEIS3    | 320.7537 | -0.76706 | 0.240639 | -3.18758 | 0.001435 | 0.01345  |
| SERF1A   | 783.6534 | 0.392862 | 0.12325  | 3.187513 | 0.001435 | 0.01345  |
| H6PD     | 1786.278 | -0.54637 | 0.171419 | -3.18732 | 0.001436 | 0.013451 |
| PPARGC1A | 118.6691 | 0.795572 | 0.249662 | 3.186595 | 0.00144  | 0.013477 |
| KLC4     | 417.6157 | -0.71447 | 0.224256 | -3.18594 | 0.001443 | 0.013499 |
| PNPLA2   | 551.5787 | -0.75535 | 0.237133 | -3.18535 | 0.001446 | 0.013518 |
| DAP3     | 2301.344 | 0.352274 | 0.110647 | 3.183775 | 0.001454 | 0.013579 |
| ETV5     | 956.3428 | 0.591127 | 0.185682 | 3.183554 | 0.001455 | 0.013579 |
| psg4     | 1954.021 | -0.61118 | 0.191982 | -3.18352 | 0.001455 | 0.013579 |
| MTMR9LP  | 57.45759 | -0.86063 | 0.270362 | -3.18325 | 0.001456 | 0.013584 |
| Uqcrc2   | 5684.627 | 0.348734 | 0.109575 | 3.182602 | 0.00146  | 0.013601 |
| NPR2     | 738.8378 | -0.44401 | 0.139517 | -3.18244 | 0.00146  | 0.013601 |
| SERF1B   | 792.4041 | 0.38627  | 0.121379 | 3.182359 | 0.001461 | 0.013601 |
| DYNLT3   | 1321.926 | -0.42345 | 0.133087 | -3.18176 | 0.001464 | 0.01362  |
| PHF20L1  | 2515.132 | 0.453455 | 0.142523 | 3.181614 | 0.001465 | 0.01362  |
| ZNF404   | 161.5091 | -0.61882 | 0.194589 | -3.18012 | 0.001472 | 0.013682 |
| NDUFB3   | 726.3489 | 0.415465 | 0.130653 | 3.179912 | 0.001473 | 0.013683 |
| PRPF4    | 1123.081 | 0.369521 | 0.116263 | 3.178323 | 0.001481 | 0.01375  |
| MKKS     | 1097.986 | 0.483691 | 0.152196 | 3.178087 | 0.001483 | 0.013753 |
| ZNF470   | 430.4853 | -0.53221 | 0.167489 | -3.1776  | 0.001485 | 0.013768 |
| GNAI2    | 3450.37  | -0.52435 | 0.16512  | -3.17557 | 0.001495 | 0.013857 |
| KIF23    | 3775.091 | 0.484135 | 0.15248  | 3.175074 | 0.001498 | 0.013872 |
| brca2    | 2626.456 | 0.626242 | 0.197264 | 3.17464  | 0.0015   | 0.013877 |
| parp2    | 495.4883 | 0.46655  | 0.146962 | 3.174625 | 0.0015   | 0.013877 |
| FBXO45   | 1436.891 | 0.414248 | 0.130507 | 3.174152 | 0.001503 | 0.013891 |
| TRPT1    | 298.4773 | -0.6998  | 0.220506 | -3.17362 | 0.001506 | 0.013908 |
| CPED1    | 1116.562 | -0.47653 | 0.150162 | -3.17345 | 0.001506 | 0.013908 |
| MAPK8IP3 | 578.4679 | -0.72938 | 0.229972 | -3.17159 | 0.001516 | 0.013989 |
| ASPN     | 32.66183 | 1.294988 | 0.408332 | 3.171411 | 0.001517 | 0.013989 |
| ALDH6A1  | 473.8889 | -0.45671 | 0.14402  | -3.17114 | 0.001518 | 0.013994 |

|          |          |          |          |          |          |          |
|----------|----------|----------|----------|----------|----------|----------|
| TOMM5    | 1289.27  | 0.40932  | 0.129095 | 3.170678 | 0.001521 | 0.014008 |
| ITM2C    | 3151.075 | -0.65217 | 0.205703 | -3.17046 | 0.001522 | 0.01401  |
| MTCH2    | 2756.321 | 0.377427 | 0.119084 | 3.169413 | 0.001527 | 0.014041 |
| NGDN     | 356.597  | 0.47741  | 0.150636 | 3.169303 | 0.001528 | 0.014041 |
| MDM1     | 405.9488 | 0.487086 | 0.153764 | 3.167744 | 0.001536 | 0.014104 |
| ZNF180   | 362.6213 | 0.517397 | 0.163338 | 3.167649 | 0.001537 | 0.014104 |
| EXOSC2   | 1137.245 | 0.407407 | 0.128672 | 3.166234 | 0.001544 | 0.01416  |
| INCA1    | 172.9666 | -0.68082 | 0.215031 | -3.16614 | 0.001545 | 0.01416  |
| SPEG     | 268.8239 | -0.70813 | 0.223683 | -3.16579 | 0.001547 | 0.014169 |
| TRIM33   | 2724.628 | 0.440106 | 0.139045 | 3.165205 | 0.00155  | 0.014179 |
| CD81     | 2899.561 | -0.69542 | 0.219714 | -3.16513 | 0.00155  | 0.014179 |
| NDUFB6   | 694.4587 | 0.429352 | 0.135653 | 3.165067 | 0.00155  | 0.014179 |
| TBC1D4   | 1860.635 | 0.376384 | 0.118945 | 3.16435  | 0.001554 | 0.014206 |
| DGKD     | 5766.869 | -0.43615 | 0.137889 | -3.16302 | 0.001561 | 0.014249 |
| SLC38A9  | 386.4602 | 0.536215 | 0.169533 | 3.162901 | 0.001562 | 0.014249 |
| PINK1    | 1596.583 | -0.5117  | 0.161786 | -3.16282 | 0.001563 | 0.014249 |
| hla-a    | 17286.04 | -0.63172 | 0.199736 | -3.16278 | 0.001563 | 0.014249 |
| MTFR2    | 134.4023 | 0.658925 | 0.208406 | 3.161731 | 0.001568 | 0.014284 |
| GMPS     | 3930.239 | 0.405804 | 0.128355 | 3.161576 | 0.001569 | 0.014284 |
| CTIF     | 523.7567 | -0.58201 | 0.184091 | -3.16151 | 0.00157  | 0.014284 |
| ZBTB24   | 594.1442 | 0.441412 | 0.139627 | 3.161371 | 0.00157  | 0.014284 |
| XPO4     | 2745.362 | 0.503773 | 0.159368 | 3.16107  | 0.001572 | 0.014291 |
| LMAN1    | 12274.86 | -0.50699 | 0.160414 | -3.16051 | 0.001575 | 0.01431  |
| DTNA     | 40.32796 | -1.0266  | 0.324901 | -3.15973 | 0.001579 | 0.01434  |
| PPIH     | 957.4226 | 0.377963 | 0.119665 | 3.158513 | 0.001586 | 0.014387 |
| COPG1    | 6800.256 | -0.48028 | 0.152062 | -3.15842 | 0.001586 | 0.014387 |
| ZNF480   | 780.3596 | 0.538823 | 0.170613 | 3.158154 | 0.001588 | 0.014392 |
| LARP7    | 1098.231 | 0.392423 | 0.124302 | 3.157014 | 0.001594 | 0.01444  |
| ADSS     | 1679.679 | 0.3875   | 0.122792 | 3.155737 | 0.001601 | 0.014495 |
| SLC35A2  | 505.3996 | -0.60826 | 0.192778 | -3.15522 | 0.001604 | 0.01451  |
| NTF3     | 22.84963 | -1.54773 | 0.490558 | -3.15505 | 0.001605 | 0.01451  |
| SDCBP2   | 36.84407 | -1.09576 | 0.347318 | -3.15491 | 0.001605 | 0.01451  |
| ARIH2    | 2406.741 | 0.338252 | 0.107271 | 3.153245 | 0.001615 | 0.014585 |
| RPP40    | 244.8249 | 0.553425 | 0.175583 | 3.151922 | 0.001622 | 0.01464  |
| TEAD2    | 992.4377 | 0.45487  | 0.144327 | 3.151664 | 0.001623 | 0.01464  |
| Snord72  | 26.9857  | 1.34384  | 0.426394 | 3.151638 | 0.001624 | 0.01464  |
| C8orf44  | 235.5781 | -0.54945 | 0.174354 | -3.15136 | 0.001625 | 0.014645 |
| SCYL1    | 1457.132 | -0.60823 | 0.193055 | -3.15055 | 0.00163  | 0.014677 |
| MTHFR    | 362.0643 | -0.53775 | 0.170876 | -3.14702 | 0.001649 | 0.014847 |
| P4HTM    | 305.9639 | -0.75728 | 0.240733 | -3.14572 | 0.001657 | 0.014904 |
| TOR3A    | 723.3729 | 0.40339  | 0.128261 | 3.145064 | 0.001661 | 0.014929 |
| BCLAF1   | 5555.292 | 0.475977 | 0.151351 | 3.144863 | 0.001662 | 0.014931 |
| ZNF473   | 517.8484 | 0.427302 | 0.135942 | 3.143273 | 0.001671 | 0.014996 |
| C9orf163 | 13.20067 | -1.95007 | 0.6204   | -3.14324 | 0.001671 | 0.014996 |
| SUSD1    | 244.644  | -0.51723 | 0.164565 | -3.14299 | 0.001672 | 0.014997 |
| RBM47    | 367.1828 | 0.493935 | 0.15716  | 3.142887 | 0.001673 | 0.014997 |
| PEX6     | 1185.154 | -0.58045 | 0.184725 | -3.14226 | 0.001676 | 0.015016 |
| NDUFA9   | 1761.546 | 0.377545 | 0.120154 | 3.14218  | 0.001677 | 0.015016 |
| MROH1    | 369.6588 | -0.75552 | 0.240496 | -3.14151 | 0.001681 | 0.015041 |
| FXYS5    | 1196.667 | -0.54915 | 0.174857 | -3.14054 | 0.001686 | 0.015082 |

|           |          |          |          |          |          |          |
|-----------|----------|----------|----------|----------|----------|----------|
| APTX      | 822.1561 | 0.382265 | 0.121794 | 3.138614 | 0.001697 | 0.015173 |
| PIWIL2    | 27.56696 | -1.4725  | 0.469194 | -3.13836 | 0.001699 | 0.015177 |
| GPR37     | 173.4163 | -0.58489 | 0.186397 | -3.13789 | 0.001702 | 0.015193 |
| RAD51C    | 350.5514 | 0.448041 | 0.142821 | 3.137072 | 0.001706 | 0.015227 |
| WDR13     | 383.8782 | -0.80721 | 0.257433 | -3.1356  | 0.001715 | 0.015284 |
| SMC4      | 8853.741 | 0.523028 | 0.166805 | 3.135563 | 0.001715 | 0.015284 |
| PXN       | 1657.245 | -0.46148 | 0.147194 | -3.1352  | 0.001717 | 0.015284 |
| MTRR      | 959.8698 | 0.367854 | 0.117332 | 3.135144 | 0.001718 | 0.015284 |
| UBA3      | 2019.651 | 0.396922 | 0.126605 | 3.135117 | 0.001718 | 0.015284 |
| FAM171B   | 122.9866 | 0.641471 | 0.204638 | 3.134667 | 0.00172  | 0.015299 |
| TBPL1     | 424.7881 | 0.449053 | 0.143291 | 3.133864 | 0.001725 | 0.015332 |
| TLE3      | 251.3001 | -0.54684 | 0.174561 | -3.13268 | 0.001732 | 0.015385 |
| STEAP1    | 514.5061 | 0.437405 | 0.139654 | 3.132062 | 0.001736 | 0.015396 |
| GOLGA2    | 2691.995 | -0.53073 | 0.169451 | -3.13204 | 0.001736 | 0.015396 |
| NCSTN     | 1498.073 | -0.39057 | 0.124704 | -3.13196 | 0.001736 | 0.015396 |
| rmu12     | 135.4497 | 0.613742 | 0.196072 | 3.130189 | 0.001747 | 0.015476 |
| PMM1      | 462.0679 | -0.69787 | 0.222954 | -3.13012 | 0.001747 | 0.015476 |
| KLHL42    | 1168.319 | 0.414238 | 0.132349 | 3.129907 | 0.001749 | 0.015477 |
| NEDD1     | 1241.858 | 0.460312 | 0.14708  | 3.129663 | 0.00175  | 0.015477 |
| SLC35E2   | 412.3671 | -0.54445 | 0.17397  | -3.12959 | 0.00175  | 0.015477 |
| tmem187   | 124.4943 | -0.75582 | 0.241542 | -3.12914 | 0.001753 | 0.015492 |
| NAA50     | 5833.001 | 0.403703 | 0.129032 | 3.128703 | 0.001756 | 0.015506 |
| FLNA      | 30380.83 | -0.75829 | 0.242379 | -3.12853 | 0.001757 | 0.015506 |
| SALL1     | 1295.191 | -0.38367 | 0.122674 | -3.12759 | 0.001762 | 0.015547 |
| ZC3H8     | 199.6392 | 0.590009 | 0.188669 | 3.127209 | 0.001765 | 0.015558 |
| DEPDC1    | 3623.222 | 0.462889 | 0.148033 | 3.126937 | 0.001766 | 0.015564 |
| ADAMTSL4  | 214.1298 | -0.65773 | 0.21039  | -3.12625 | 0.001771 | 0.015591 |
| SMAD1     | 313.4731 | 0.50005  | 0.16022  | 3.121015 | 0.001802 | 0.015862 |
| FOXO1     | 413.2065 | -0.49233 | 0.157784 | -3.12029 | 0.001807 | 0.015892 |
| BRMS1L    | 175.2439 | 0.638536 | 0.204656 | 3.120051 | 0.001808 | 0.015896 |
| BCL9L     | 836.1412 | -0.72406 | 0.232146 | -3.11899 | 0.001815 | 0.015944 |
| PARP9     | 570.3798 | 0.43041  | 0.13805  | 3.117791 | 0.001822 | 0.015999 |
| RANBP1    | 1745.811 | 0.392856 | 0.12601  | 3.117649 | 0.001823 | 0.015999 |
| OBSL1     | 1326.702 | -0.67957 | 0.21804  | -3.1167  | 0.001829 | 0.016032 |
| MOCOS     | 65.97914 | 0.863323 | 0.277079 | 3.115802 | 0.001834 | 0.016072 |
| CDH13     | 2144.228 | -0.38716 | 0.124268 | -3.11549 | 0.001836 | 0.01608  |
| MTHFD1    | 1599.642 | 0.37809  | 0.121509 | 3.111632 | 0.001861 | 0.016275 |
| H2AFV     | 5570.635 | 0.350541 | 0.112659 | 3.111513 | 0.001861 | 0.016275 |
| MAD2L1    | 1858.299 | 0.411058 | 0.132121 | 3.111234 | 0.001863 | 0.016275 |
| NUP98     | 6161.584 | 0.316386 | 0.101692 | 3.111205 | 0.001863 | 0.016275 |
| PHAX      | 1380.741 | 0.359    | 0.115393 | 3.111098 | 0.001864 | 0.016275 |
| ZMYND10   | 34.55283 | -1.28885 | 0.414311 | -3.11082 | 0.001866 | 0.016281 |
| SNX2      | 1609.865 | 0.406471 | 0.130672 | 3.110624 | 0.001867 | 0.016282 |
| AP5M1     | 530.5624 | 0.464473 | 0.149464 | 3.107595 | 0.001886 | 0.016439 |
| SOD1      | 6191.32  | 0.30949  | 0.099596 | 3.107458 | 0.001887 | 0.016439 |
| LOC143666 | 81.48832 | -0.80219 | 0.258338 | -3.10519 | 0.001902 | 0.016556 |
| CUL3      | 4229.457 | 0.384371 | 0.123794 | 3.104922 | 0.001903 | 0.016562 |
| FADS3     | 566.9215 | -0.70074 | 0.225867 | -3.10246 | 0.001919 | 0.016691 |
| TNFSF12   | 64.66118 | -0.88941 | 0.286731 | -3.10189 | 0.001923 | 0.016714 |
| ZNF35     | 275.4925 | 0.584823 | 0.188549 | 3.101712 | 0.001924 | 0.016714 |

|           |          |          |          |          |          |          |
|-----------|----------|----------|----------|----------|----------|----------|
| OSMR      | 6254.545 | -0.36419 | 0.11743  | -3.10134 | 0.001926 | 0.016726 |
| B3GNT9    | 406.1032 | -0.67037 | 0.216169 | -3.10115 | 0.001928 | 0.016727 |
| PKD2      | 1373.507 | 0.432923 | 0.139637 | 3.100349 | 0.001933 | 0.016763 |
| MRPL21    | 661.3592 | 0.391454 | 0.126282 | 3.099834 | 0.001936 | 0.016783 |
| RABIF     | 165.9478 | 0.557363 | 0.179832 | 3.099348 | 0.001939 | 0.016801 |
| TMSB15A   | 65.50227 | 0.86238  | 0.278321 | 3.098507 | 0.001945 | 0.016839 |
| SEC61G    | 3018.057 | -0.39966 | 0.129005 | -3.09804 | 0.001948 | 0.016856 |
| LRRC8B    | 55.45411 | 0.967277 | 0.312312 | 3.097149 | 0.001954 | 0.016898 |
| hdgfrp3   | 1985.723 | 0.469985 | 0.151759 | 3.096929 | 0.001955 | 0.016901 |
| LOC390956 | 14.32166 | 1.72955  | 0.558506 | 3.096741 | 0.001957 | 0.016902 |
| CMTR2     | 899.9736 | 0.397899 | 0.128508 | 3.096293 | 0.00196  | 0.016918 |
| TMEM43    | 2456.981 | -0.39776 | 0.128473 | -3.09607 | 0.001961 | 0.016921 |
| DNAJC4    | 311.6104 | -0.83421 | 0.269472 | -3.09573 | 0.001963 | 0.016926 |
| DCUN1D5   | 1456.176 | 0.414563 | 0.133923 | 3.095529 | 0.001965 | 0.016926 |
| TRIM22    | 894.7955 | 0.371763 | 0.120103 | 3.095364 | 0.001966 | 0.016926 |
| PBXIP1    | 1665.307 | -0.54695 | 0.176714 | -3.09509 | 0.001968 | 0.016926 |
| DNAJB6    | 1040.933 | 0.377242 | 0.121884 | 3.095075 | 0.001968 | 0.016926 |
| ATAD5     | 1819.76  | 0.506346 | 0.163601 | 3.094999 | 0.001968 | 0.016926 |
| SUZ12     | 2921.282 | 0.446321 | 0.144218 | 3.09477  | 0.00197  | 0.01693  |
| TMEM183B  | 1102.762 | 0.350864 | 0.113446 | 3.092768 | 0.001983 | 0.017035 |
| GK3P      | 60.45411 | 0.87592  | 0.283267 | 3.092208 | 0.001987 | 0.017043 |
| TRIAP1    | 498.8231 | 0.47012  | 0.152035 | 3.092175 | 0.001987 | 0.017043 |
| PSIP1     | 3040.765 | 0.426383 | 0.137893 | 3.092131 | 0.001987 | 0.017043 |
| IFIT3     | 252.5391 | 0.570445 | 0.184578 | 3.09054  | 0.001998 | 0.017125 |
| CS        | 3426.954 | 0.370454 | 0.119981 | 3.087607 | 0.002018 | 0.017284 |
| LOC388692 | 399.3088 | -0.51855 | 0.167954 | -3.08746 | 0.002019 | 0.017284 |
| ABLIM3    | 1740.664 | -0.34496 | 0.111742 | -3.08707 | 0.002021 | 0.017298 |
| XXYLT1    | 390.3234 | 0.448389 | 0.145256 | 3.086886 | 0.002023 | 0.017298 |
| MNT       | 271.5105 | -0.54956 | 0.178058 | -3.08639 | 0.002026 | 0.017318 |
| RMDN2     | 58.86945 | 0.822736 | 0.266617 | 3.085832 | 0.00203  | 0.017341 |
| PRX       | 135.1887 | -0.67158 | 0.217647 | -3.08564 | 0.002031 | 0.017342 |
| CCDC80    | 5107.89  | -0.35533 | 0.115182 | -3.08492 | 0.002036 | 0.017374 |
| DDT       | 139.5444 | -0.92834 | 0.300988 | -3.08432 | 0.00204  | 0.0174   |
| CMTM6     | 4457.71  | 0.33963  | 0.110128 | 3.083944 | 0.002043 | 0.017409 |
| ARRDC1    | 121.6073 | -0.76808 | 0.249065 | -3.08384 | 0.002043 | 0.017409 |
| MALT1     | 2444.16  | 0.38838  | 0.125987 | 3.082695 | 0.002051 | 0.017457 |
| ATP5A1    | 9355.17  | 0.301592 | 0.097854 | 3.08205  | 0.002056 | 0.017485 |
| DENND6B   | 41.29169 | -1.04759 | 0.339929 | -3.08178 | 0.002058 | 0.017491 |
| SCRN2     | 613.2869 | -0.78702 | 0.255394 | -3.0816  | 0.002059 | 0.017492 |
| FIGNL1    | 489.9306 | 0.624753 | 0.202761 | 3.081228 | 0.002061 | 0.017504 |
| HDAC9     | 1221.198 | -0.41718 | 0.135425 | -3.08052 | 0.002066 | 0.017537 |
| PRMT2     | 1316.898 | -0.53604 | 0.174033 | -3.08009 | 0.002069 | 0.017552 |
| MKNK2     | 975.0849 | -0.60365 | 0.196025 | -3.07946 | 0.002074 | 0.017579 |
| PDCD2     | 842.4824 | 0.388664 | 0.126256 | 3.078383 | 0.002081 | 0.017634 |
| CACNA1C   | 823.4402 | -0.3764  | 0.122298 | -3.07773 | 0.002086 | 0.017659 |
| SNHG1     | 2143.96  | 0.43241  | 0.140501 | 3.077636 | 0.002086 | 0.017659 |
| SRSF10    | 3125.319 | 0.428857 | 0.139361 | 3.077316 | 0.002089 | 0.017668 |
| CCND1     | 3126.816 | 0.389166 | 0.126484 | 3.076799 | 0.002092 | 0.017689 |
| BTG2      | 54.9416  | 0.938308 | 0.30502  | 3.076212 | 0.002096 | 0.017714 |
| AGAP2-AS1 | 31.70206 | -1.36422 | 0.443524 | -3.07586 | 0.002099 | 0.017725 |

|           |          |          |          |          |          |          |
|-----------|----------|----------|----------|----------|----------|----------|
| KLHL31    | 28.98965 | -1.18484 | 0.385326 | -3.0749  | 0.002106 | 0.017773 |
| RHBDL3    | 252.945  | 0.48408  | 0.157489 | 3.073734 | 0.002114 | 0.017832 |
| MBOAT7    | 756.4849 | -0.51916 | 0.16894  | -3.07301 | 0.002119 | 0.017866 |
| MIS18BP1  | 729.1554 | 0.485406 | 0.157982 | 3.072536 | 0.002122 | 0.017885 |
| FBN2      | 714.9333 | 0.401676 | 0.130744 | 3.07223  | 0.002125 | 0.017893 |
| AGER      | 95.43005 | -0.70754 | 0.230332 | -3.07182 | 0.002128 | 0.017908 |
| DONSON    | 1423.965 | 0.373867 | 0.121724 | 3.071425 | 0.00213  | 0.017913 |
| KATNBL1P6 | 108.1447 | 0.775572 | 0.252512 | 3.07142  | 0.00213  | 0.017913 |
| MST1      | 144.509  | -0.78865 | 0.256798 | -3.07108 | 0.002133 | 0.017923 |
| HMMR      | 2492.284 | 0.548178 | 0.178605 | 3.069221 | 0.002146 | 0.018025 |
| PPL       | 87.66273 | -0.76169 | 0.248387 | -3.06655 | 0.002165 | 0.018177 |
| WBSCR27   | 44.3586  | -1.0874  | 0.354809 | -3.06475 | 0.002179 | 0.018266 |
| MTIF2     | 1518.575 | 0.406632 | 0.132686 | 3.064613 | 0.00218  | 0.018266 |
| HNRNPH1   | 13532.68 | 0.309993 | 0.101162 | 3.064313 | 0.002182 | 0.018266 |
| PNPLA6    | 585.6902 | -0.67792 | 0.221234 | -3.06425 | 0.002182 | 0.018266 |
| TMEM219   | 1012.812 | -0.55784 | 0.182055 | -3.06415 | 0.002183 | 0.018266 |
| MSX1      | 119.4853 | 0.643895 | 0.21014  | 3.064122 | 0.002183 | 0.018266 |
| MVP       | 3220.302 | -0.73524 | 0.240014 | -3.06333 | 0.002189 | 0.018304 |
| TRAPPC10  | 1793.06  | 0.329993 | 0.107756 | 3.062396 | 0.002196 | 0.018352 |
| ELL       | 190.8998 | -0.67822 | 0.221481 | -3.06221 | 0.002197 | 0.018353 |
| CHRNA3    | 39.95327 | -1.06393 | 0.347599 | -3.06079 | 0.002208 | 0.01843  |
| C1orf216  | 659.2374 | 0.383168 | 0.125216 | 3.060065 | 0.002213 | 0.018465 |
| MED17     | 1081.431 | 0.357305 | 0.116788 | 3.059437 | 0.002218 | 0.018494 |
| ATP6AP1L  | 72.3484  | -0.9327  | 0.304939 | -3.05864 | 0.002223 | 0.018528 |
| SLC35B4   | 1226.811 | 0.4754   | 0.155432 | 3.058568 | 0.002224 | 0.018528 |
| DUSP12    | 482.9095 | 0.466899 | 0.152683 | 3.057969 | 0.002228 | 0.018555 |
| STIL      | 2143.448 | 0.465242 | 0.152153 | 3.057735 | 0.00223  | 0.018559 |
| TRHDE-AS1 | 501.4115 | -0.613   | 0.200508 | -3.05726 | 0.002234 | 0.018579 |
| SEMA4G    | 71.65034 | -0.82239 | 0.269068 | -3.05643 | 0.00224  | 0.01861  |
| PIGT      | 2642.304 | -0.56853 | 0.186048 | -3.05581 | 0.002245 | 0.018639 |
| NUP133    | 2087.396 | 0.361611 | 0.11835  | 3.055433 | 0.002247 | 0.018646 |
| FGD5-AS1  | 3107.21  | 0.309367 | 0.101254 | 3.055361 | 0.002248 | 0.018646 |
| ORAI3     | 690.3211 | -0.59442 | 0.194581 | -3.05487 | 0.002252 | 0.018658 |
| LINC01001 | 52.96731 | -1.00899 | 0.330292 | -3.05485 | 0.002252 | 0.018658 |
| LAPTM4B   | 3733.061 | 0.30877  | 0.101082 | 3.054664 | 0.002253 | 0.01866  |
| VASH2     | 371.8371 | 0.519228 | 0.169997 | 3.054345 | 0.002256 | 0.018669 |
| TMTC3     | 2729.595 | 0.409195 | 0.134013 | 3.053402 | 0.002263 | 0.018718 |
| GPR176    | 712.0785 | -0.3886  | 0.127276 | -3.05321 | 0.002264 | 0.01872  |
| POLE2     | 195.5636 | 0.655657 | 0.214805 | 3.052329 | 0.002271 | 0.018765 |
| MGME1     | 1202.779 | 0.404206 | 0.132442 | 3.051943 | 0.002274 | 0.018779 |
| RPP30     | 669.7236 | 0.436285 | 0.142972 | 3.051551 | 0.002277 | 0.018794 |
| ZNF724    | 471.5545 | 0.517739 | 0.169732 | 3.050327 | 0.002286 | 0.01886  |
| SNORD45A  | 104.1565 | 0.731047 | 0.239676 | 3.050145 | 0.002287 | 0.018862 |
| INTS8     | 2475.222 | 0.38892  | 0.127569 | 3.048698 | 0.002298 | 0.018943 |
| PARBPB    | 478.6303 | 0.533128 | 0.174888 | 3.048405 | 0.002301 | 0.018951 |
| PTS       | 441.0995 | 0.42763  | 0.140326 | 3.047397 | 0.002308 | 0.019005 |
| BACE2     | 1765.17  | -0.36013 | 0.118184 | -3.04718 | 0.00231  | 0.019006 |
| ATP6V0A2  | 729.5058 | 0.422303 | 0.138594 | 3.047059 | 0.002311 | 0.019006 |
| CBX8      | 219.1868 | -0.62638 | 0.205776 | -3.04399 | 0.002335 | 0.019191 |
| MRPL32    | 1110.845 | 0.356525 | 0.117133 | 3.043757 | 0.002336 | 0.019195 |

|           |          |          |          |          |          |          |
|-----------|----------|----------|----------|----------|----------|----------|
| SNX8      | 271.225  | -0.68081 | 0.223713 | -3.04322 | 0.002341 | 0.019219 |
| CYB561    | 1182.729 | -0.42752 | 0.140511 | -3.04257 | 0.002346 | 0.019251 |
| ZNF98     | 48.29669 | 0.963705 | 0.316776 | 3.042229 | 0.002348 | 0.019262 |
| XAF1      | 442.3953 | 0.438468 | 0.144148 | 3.041793 | 0.002352 | 0.01928  |
| HIST1H2AD | 20.47922 | 1.751125 | 0.57579  | 3.041259 | 0.002356 | 0.019304 |
| ACTR3     | 9361.368 | 0.352874 | 0.116049 | 3.040743 | 0.00236  | 0.019327 |
| UBC       | 35304.12 | -0.3694  | 0.12154  | -3.0393  | 0.002371 | 0.019409 |
| IGSF8     | 376.2498 | -0.82721 | 0.27234  | -3.03743 | 0.002386 | 0.01952  |
| MOB4      | 1394.552 | 0.378879 | 0.12479  | 3.036127 | 0.002396 | 0.019586 |
| MYO1F     | 49.2109  | -0.93847 | 0.309104 | -3.03609 | 0.002397 | 0.019586 |
| ADH5      | 5013.011 | 0.342509 | 0.112829 | 3.035659 | 0.0024   | 0.019603 |
| NUFIP1    | 499.2917 | 0.477521 | 0.157331 | 3.035125 | 0.002404 | 0.019628 |
| C1orf131  | 316.4164 | 0.467988 | 0.154245 | 3.034049 | 0.002413 | 0.019687 |
| FAM157A   | 41.65305 | -0.96827 | 0.31916  | -3.03379 | 0.002415 | 0.019694 |
| FOXO3     | 1926.297 | -0.34333 | 0.113193 | -3.0331  | 0.002421 | 0.019729 |
| NDUFV2    | 1305.221 | 0.359909 | 0.118681 | 3.032574 | 0.002425 | 0.01974  |
| FAM96A    | 837.4417 | 0.391944 | 0.129249 | 3.032474 | 0.002426 | 0.01974  |
| TPD52     | 1014.776 | -0.51031 | 0.168282 | -3.03245 | 0.002426 | 0.01974  |
| LAMB4     | 351.1157 | -0.45091 | 0.148721 | -3.03193 | 0.00243  | 0.019764 |
| FAM43A    | 203.0292 | 0.578729 | 0.190919 | 3.031272 | 0.002435 | 0.019796 |
| CABIN1    | 2012.371 | -0.46293 | 0.152733 | -3.03096 | 0.002438 | 0.019807 |
| DBR1      | 462.889  | 0.431326 | 0.142425 | 3.028442 | 0.002458 | 0.019962 |
| CCDC121   | 81.81249 | 0.699332 | 0.230977 | 3.027709 | 0.002464 | 0.02     |
| PLEKHM1P1 | 317.0896 | -0.5003  | 0.165282 | -3.02693 | 0.002471 | 0.020041 |
| LBH       | 263.7349 | -0.58636 | 0.193729 | -3.0267  | 0.002472 | 0.020045 |
| TXLNG     | 849.2679 | 0.440885 | 0.145704 | 3.025901 | 0.002479 | 0.020088 |
| PDIA5     | 403.5658 | -0.53757 | 0.177731 | -3.02466 | 0.002489 | 0.020149 |
| PDE4DIP   | 3632.373 | -0.37562 | 0.124189 | -3.02459 | 0.00249  | 0.020149 |
| DNAJC8    | 2425.113 | 0.325867 | 0.107742 | 3.024501 | 0.00249  | 0.020149 |
| SDHD      | 2136.054 | 0.326705 | 0.108061 | 3.023346 | 0.0025   | 0.020206 |
| c5orf30   | 868.1405 | 0.436999 | 0.144542 | 3.023333 | 0.0025   | 0.020206 |
| HNRNP     | 6623.582 | 0.358116 | 0.11851  | 3.021805 | 0.002513 | 0.020298 |
| EFCAB2    | 147.0515 | 0.64749  | 0.214289 | 3.021571 | 0.002515 | 0.020303 |
| 43533     | 227.1682 | -0.54262 | 0.179624 | -3.02088 | 0.00252  | 0.020339 |
| CCT8      | 7180.343 | 0.367362 | 0.121632 | 3.020267 | 0.002526 | 0.020369 |
| Snord52   | 28.05922 | 1.181726 | 0.391446 | 3.018875 | 0.002537 | 0.020452 |
| ATP8B3    | 226.8245 | -0.56243 | 0.186314 | -3.01871 | 0.002539 | 0.020453 |
| LINC00486 | 197.7972 | -0.78053 | 0.258596 | -3.01835 | 0.002542 | 0.020466 |
| ZFP69     | 156.471  | 0.597416 | 0.198035 | 3.016714 | 0.002555 | 0.020566 |
| NEMF      | 1174.129 | 0.407764 | 0.135189 | 3.016242 | 0.002559 | 0.020588 |
| ICOSLG    | 395.8318 | -0.5935  | 0.196802 | -3.01571 | 0.002564 | 0.020607 |
| LIN52     | 199.1527 | 0.51548  | 0.170941 | 3.015542 | 0.002565 | 0.020607 |
| hist1h2bm | 111.0738 | 0.836233 | 0.277364 | 3.014934 | 0.00257  | 0.020619 |
| HYI       | 31.17575 | -1.28417 | 0.425949 | -3.01484 | 0.002571 | 0.020619 |
| TIMM23    | 828.2315 | 0.396829 | 0.131625 | 3.014833 | 0.002571 | 0.020619 |
| PRPF38B   | 1170.861 | 0.369383 | 0.122534 | 3.014546 | 0.002574 | 0.020628 |
| GATS      | 418.8044 | 0.425715 | 0.141239 | 3.01414  | 0.002577 | 0.020645 |
| SYNE2     | 2436.342 | 0.4627   | 0.153546 | 3.013429 | 0.002583 | 0.020683 |
| MTX2      | 942.5705 | 0.40139  | 0.133211 | 3.013191 | 0.002585 | 0.020688 |
| GBF1      | 2820.497 | -0.36293 | 0.120475 | -3.01249 | 0.002591 | 0.020725 |

|            |          |          |          |          |          |          |
|------------|----------|----------|----------|----------|----------|----------|
| FKBP11     | 300.6429 | -0.44572 | 0.147987 | -3.01189 | 0.002596 | 0.020755 |
| FRAT2      | 191.7182 | 0.544769 | 0.180915 | 3.011193 | 0.002602 | 0.020792 |
| SEC31B     | 334.7875 | -0.48723 | 0.161828 | -3.01082 | 0.002605 | 0.020807 |
| CRSP8P     | 167.5579 | 0.564945 | 0.18769  | 3.009994 | 0.002613 | 0.020853 |
| PLP2       | 1956.374 | -0.35039 | 0.116422 | -3.00962 | 0.002616 | 0.020868 |
| DCUN1D1    | 1699.483 | 0.432041 | 0.143625 | 3.008113 | 0.002629 | 0.020961 |
| sdcl       | 449.0052 | 0.520085 | 0.173053 | 3.005344 | 0.002653 | 0.021142 |
| CDK5RAP1   | 822.8666 | 0.356171 | 0.118526 | 3.00499  | 0.002656 | 0.021155 |
| PLEKHG5    | 617.3    | -0.64846 | 0.215821 | -3.00463 | 0.002659 | 0.021169 |
| AGA        | 399.0627 | -0.42609 | 0.141833 | -3.00415 | 0.002663 | 0.021192 |
| COMMD2     | 1274.663 | 0.361403 | 0.120309 | 3.003964 | 0.002665 | 0.021194 |
| S1PR1      | 26.70273 | 1.307854 | 0.435631 | 3.002204 | 0.00268  | 0.021306 |
| CENPF      | 12415.87 | 0.535805 | 0.178485 | 3.001962 | 0.002682 | 0.021309 |
| BPGM       | 756.8221 | 0.405401 | 0.135051 | 3.001845 | 0.002683 | 0.021309 |
| ANKS3      | 231.5355 | -0.62614 | 0.208631 | -3.00118 | 0.002689 | 0.021345 |
| PSMC6      | 915.357  | 0.42327  | 0.141095 | 2.999885 | 0.002701 | 0.021425 |
| SNAPC3     | 1487.146 | -0.42804 | 0.142726 | -2.99903 | 0.002708 | 0.021474 |
| PUS3       | 404.5535 | 0.464975 | 0.155065 | 2.998573 | 0.002712 | 0.021488 |
| ZHX1       | 1640.128 | 0.409398 | 0.136534 | 2.998514 | 0.002713 | 0.021488 |
| P2RX4      | 175.5436 | -0.65371 | 0.218099 | -2.99729 | 0.002724 | 0.021563 |
| ZNF442     | 60.33854 | 0.856107 | 0.285675 | 2.996787 | 0.002728 | 0.021574 |
| WDR53      | 395.4565 | 0.459009 | 0.153171 | 2.996711 | 0.002729 | 0.021574 |
| PIN4       | 610.3701 | 0.397923 | 0.132788 | 2.99667  | 0.002729 | 0.021574 |
| MYLIP      | 425.0683 | 0.551626 | 0.184138 | 2.995724 | 0.002738 | 0.02163  |
| CDK5R1     | 72.7536  | 0.729498 | 0.243554 | 2.995219 | 0.002742 | 0.021655 |
| PPP6R3     | 4645.521 | 0.345714 | 0.115442 | 2.994696 | 0.002747 | 0.021681 |
| MRPL1      | 353.0855 | 0.543986 | 0.181722 | 2.993504 | 0.002758 | 0.021755 |
| FAM193B    | 616.4769 | -0.54922 | 0.18351  | -2.99287 | 0.002764 | 0.021789 |
| chpf2      | 2135.776 | -0.60666 | 0.202927 | -2.98953 | 0.002794 | 0.022009 |
| GLRX3      | 1575.063 | 0.373523 | 0.124948 | 2.989437 | 0.002795 | 0.022009 |
| c10orf54   | 45.43669 | -0.92483 | 0.309375 | -2.98933 | 0.002796 | 0.022009 |
| KNL1       | 2134.58  | 0.50121  | 0.16768  | 2.989084 | 0.002798 | 0.022016 |
| DLGAP1-AS2 | 138.5523 | 0.66087  | 0.221121 | 2.988728 | 0.002801 | 0.02203  |
| INO80B     | 174.1049 | -0.60658 | 0.203001 | -2.98804 | 0.002808 | 0.022069 |
| CHST8      | 16.55478 | -1.75888 | 0.588713 | -2.98767 | 0.002811 | 0.022084 |
| SUMO1      | 1845.023 | 0.349625 | 0.117059 | 2.986735 | 0.00282  | 0.022141 |
| SDAD1      | 1243.81  | 0.418462 | 0.140118 | 2.986498 | 0.002822 | 0.022142 |
| GPC6       | 39.8363  | -1.03238 | 0.345693 | -2.9864  | 0.002823 | 0.022142 |
| EBF1       | 356.2557 | 0.41754  | 0.139836 | 2.985917 | 0.002827 | 0.022166 |
| IQGAP3     | 2073.573 | -0.37397 | 0.125258 | -2.98557 | 0.00283  | 0.02217  |
| MND1       | 200.9477 | 0.65244  | 0.218546 | 2.985371 | 0.002832 | 0.02217  |
| ITGB3BP    | 1016.479 | 0.476217 | 0.159531 | 2.985101 | 0.002835 | 0.02217  |
| VPS50      | 1704.742 | 0.419892 | 0.140663 | 2.985091 | 0.002835 | 0.02217  |
| NDC80      | 1048.265 | 0.474786 | 0.159052 | 2.985088 | 0.002835 | 0.02217  |
| CHID1      | 1297.995 | -0.64113 | 0.214815 | -2.98458 | 0.00284  | 0.022186 |
| AMPD2      | 2201.45  | -0.64292 | 0.215415 | -2.98456 | 0.00284  | 0.022186 |
| HARBI1     | 97.02781 | 0.649381 | 0.217599 | 2.9843   | 0.002842 | 0.022193 |
| HDLBP      | 27011.27 | -0.40591 | 0.136091 | -2.9826  | 0.002858 | 0.022306 |
| GXYLT1     | 805.5752 | 0.545755 | 0.183082 | 2.980936 | 0.002874 | 0.022416 |
| ZNF254     | 754.529  | 0.490531 | 0.164576 | 2.980585 | 0.002877 | 0.02243  |

|          |          |          |          |          |          |          |
|----------|----------|----------|----------|----------|----------|----------|
| ALDH1A1  | 147.0575 | 0.8089   | 0.271516 | 2.979201 | 0.00289  | 0.02252  |
| SNRPD3   | 2400.584 | 0.318751 | 0.107041 | 2.97785  | 0.002903 | 0.0226   |
| DUSP5P1  | 38.945   | -1.01158 | 0.339705 | -2.97781 | 0.002903 | 0.0226   |
| TNS3     | 14799.71 | -0.40098 | 0.134666 | -2.97762 | 0.002905 | 0.022603 |
| RNF181   | 1024.67  | -0.4953  | 0.166351 | -2.97745 | 0.002907 | 0.022604 |
| SMARCD1  | 932.4935 | 0.369673 | 0.124171 | 2.977135 | 0.00291  | 0.022616 |
| SOX11    | 1170.117 | 0.444645 | 0.149377 | 2.976653 | 0.002914 | 0.022639 |
| DCLRE1A  | 478.0925 | 0.479644 | 0.161143 | 2.976513 | 0.002915 | 0.022639 |
| PRRC1    | 4598.725 | -0.4563  | 0.153322 | -2.97611 | 0.002919 | 0.022657 |
| 43709    | 76.52148 | -0.78449 | 0.263631 | -2.97572 | 0.002923 | 0.022675 |
| MPHOSPH6 | 979.8544 | 0.422662 | 0.14207  | 2.975037 | 0.00293  | 0.022714 |
| MAMSTR   | 36.93991 | -1.01724 | 0.341959 | -2.97475 | 0.002932 | 0.022724 |
| AKR7A2   | 812.3334 | -0.44942 | 0.151096 | -2.97438 | 0.002936 | 0.02274  |
| DOCK6    | 250.7541 | -0.52748 | 0.177365 | -2.974   | 0.002939 | 0.022757 |
| grpel2   | 1315.138 | 0.420897 | 0.141579 | 2.972873 | 0.00295  | 0.022829 |
| TCEB3C   | 22.86634 | -1.35061 | 0.454672 | -2.97051 | 0.002973 | 0.022994 |
| MMACHC   | 658.0477 | 0.602788 | 0.202952 | 2.970098 | 0.002977 | 0.023013 |
| MIR3153  | 37.07724 | 1.130115 | 0.380547 | 2.96971  | 0.002981 | 0.02303  |
| RABGGTB  | 2029.799 | 0.440355 | 0.148332 | 2.96872  | 0.00299  | 0.023082 |
| ERGIC3   | 5977.589 | -0.49373 | 0.166324 | -2.9685  | 0.002993 | 0.023086 |
| TM2D2    | 692.635  | 0.373738 | 0.125912 | 2.968247 | 0.002995 | 0.023094 |
| DHCR7    | 2245.808 | -0.57458 | 0.193629 | -2.96743 | 0.003003 | 0.023144 |
| TRAM2    | 6481.027 | -0.35062 | 0.118172 | -2.96706 | 0.003007 | 0.023154 |
| KCNMA1   | 2013.842 | -0.45303 | 0.152689 | -2.96699 | 0.003007 | 0.023154 |
| FLJ31356 | 68.06816 | -0.78856 | 0.265842 | -2.96626 | 0.003014 | 0.023198 |
| RBM22    | 1296.571 | 0.332786 | 0.112198 | 2.966058 | 0.003016 | 0.023201 |
| TRIM14   | 512.6973 | 0.510899 | 0.172307 | 2.965053 | 0.003026 | 0.023265 |
| MAN1A1   | 168.5774 | 0.564326 | 0.190499 | 2.96236  | 0.003053 | 0.023458 |
| SH3GL1   | 759.0512 | -0.81688 | 0.27595  | -2.96025 | 0.003074 | 0.023607 |
| VCAM1    | 1621.364 | 0.746324 | 0.252127 | 2.960108 | 0.003075 | 0.023607 |
| GALK1    | 179.5351 | -0.89671 | 0.30298  | -2.95964 | 0.00308  | 0.023631 |
| IPO9     | 4504.134 | 0.372448 | 0.125867 | 2.959057 | 0.003086 | 0.023664 |
| GOS2     | 262.417  | -0.46941 | 0.158653 | -2.9587  | 0.003089 | 0.023679 |
| SKIV2L2  | 3795.305 | 0.396868 | 0.134144 | 2.958509 | 0.003091 | 0.023683 |
| LRRC46   | 54.62866 | -0.90175 | 0.304819 | -2.95831 | 0.003093 | 0.023686 |
| RIOK1    | 519.2671 | 0.460428 | 0.155668 | 2.957765 | 0.003099 | 0.023716 |
| MTMR12   | 981.5602 | 0.41526  | 0.140431 | 2.957027 | 0.003106 | 0.023754 |
| idh1     | 4968.834 | 0.320703 | 0.10846  | 2.956893 | 0.003108 | 0.023754 |
| c11orf68 | 857.3913 | -0.66872 | 0.226164 | -2.95682 | 0.003108 | 0.023754 |
| LMF2     | 607.253  | -0.79674 | 0.269515 | -2.9562  | 0.003115 | 0.02379  |
| COPA     | 12592.47 | -0.36277 | 0.122763 | -2.95509 | 0.003126 | 0.023864 |
| PHLPP2   | 1117.382 | 0.416631 | 0.141013 | 2.954555 | 0.003131 | 0.023893 |
| POLR3B   | 291.549  | 0.679598 | 0.230041 | 2.954244 | 0.003134 | 0.023906 |
| TMEM130  | 146.3221 | -0.60018 | 0.203257 | -2.95281 | 0.003149 | 0.024005 |
| STAU2    | 1319.501 | 0.392389 | 0.132901 | 2.952497 | 0.003152 | 0.024018 |
| PPP6C    | 1838.422 | 0.340272 | 0.115292 | 2.951385 | 0.003164 | 0.024092 |
| NDUFB5   | 1770.264 | 0.356398 | 0.120818 | 2.949881 | 0.003179 | 0.024198 |
| ZSWIM8   | 707.6249 | -0.60149 | 0.203926 | -2.94955 | 0.003182 | 0.024212 |
| SUN2     | 2119.521 | -0.6462  | 0.219205 | -2.9479  | 0.003199 | 0.024329 |
| PSMC2    | 2964.712 | 0.348151 | 0.118169 | 2.946199 | 0.003217 | 0.024452 |



|              |          |          |          |          |          |          |
|--------------|----------|----------|----------|----------|----------|----------|
| SNAPC5       | 209.183  | 0.512504 | 0.173966 | 2.945997 | 0.003219 | 0.024456 |
| LOC100147773 | 31.36728 | -1.05636 | 0.35869  | -2.94506 | 0.003229 | 0.024518 |
| CDC23        | 2151.119 | 0.338339 | 0.114897 | 2.944724 | 0.003232 | 0.024532 |
| KIF11        | 4137.12  | 0.449878 | 0.152886 | 2.942581 | 0.003255 | 0.024691 |
| PRKAR2A-AS1  | 74.48826 | -0.74507 | 0.253266 | -2.94183 | 0.003263 | 0.024737 |
| SNHG3        | 1801.92  | 0.360994 | 0.122716 | 2.941703 | 0.003264 | 0.024737 |
| PHYKPL       | 739.5877 | -0.4867  | 0.165481 | -2.94114 | 0.00327  | 0.02477  |
| LGALS3BP     | 5811.775 | -0.6629  | 0.225467 | -2.94013 | 0.003281 | 0.024838 |
| 43717        | 4089.815 | -0.5317  | 0.180909 | -2.93906 | 0.003292 | 0.024911 |
| LOC100507291 | 107.2818 | -0.61919 | 0.210702 | -2.9387  | 0.003296 | 0.024928 |
| NUP155       | 3588.437 | 0.449899 | 0.153104 | 2.938524 | 0.003298 | 0.02493  |
| CNPY3        | 718.9424 | -0.53333 | 0.181523 | -2.9381  | 0.003302 | 0.024953 |
| MED15        | 605.1993 | -0.60068 | 0.204466 | -2.93778 | 0.003306 | 0.024966 |
| KPNB1        | 11646.48 | 0.309984 | 0.105531 | 2.937366 | 0.00331  | 0.024987 |
| nomo1        | 8001.715 | -0.32025 | 0.109083 | -2.93583 | 0.003327 | 0.025099 |
| MAP3K7CL     | 32.7552  | -1.03993 | 0.354255 | -2.93553 | 0.00333  | 0.025111 |
| KIAA0586     | 742.3005 | 0.415213 | 0.141459 | 2.935217 | 0.003333 | 0.025124 |
| NFE2L1       | 3318.507 | -0.43797 | 0.149265 | -2.93415 | 0.003345 | 0.025186 |
| SERBP1       | 8593.328 | 0.362733 | 0.123625 | 2.934145 | 0.003345 | 0.025186 |
| BET1         | 2637.943 | -0.43161 | 0.147139 | -2.93334 | 0.003353 | 0.02524  |
| MTMR6        | 2491.153 | 0.375659 | 0.128089 | 2.932788 | 0.003359 | 0.025272 |
| PCGF6        | 248.5074 | 0.491751 | 0.167725 | 2.931891 | 0.003369 | 0.02531  |
| ZNF385A      | 32.61339 | -1.13911 | 0.388526 | -2.93187 | 0.003369 | 0.02531  |
| RAB43        | 813.1103 | -0.6576  | 0.224345 | -2.9312  | 0.003377 | 0.025346 |
| HNRNPA1P10   | 5391.71  | 0.302858 | 0.103325 | 2.931128 | 0.003377 | 0.025346 |
| TPM1         | 11303.26 | -0.44103 | 0.150482 | -2.93075 | 0.003381 | 0.025364 |
| DNM2         | 2556.932 | -0.52103 | 0.177808 | -2.93027 | 0.003387 | 0.025391 |
| BEND5        | 11.58377 | -2.34521 | 0.800491 | -2.92972 | 0.003393 | 0.025414 |
| PLIN3        | 1595.051 | -0.42872 | 0.146337 | -2.92968 | 0.003393 | 0.025414 |
| IRF7         | 100.7992 | -0.95753 | 0.326902 | -2.92912 | 0.003399 | 0.025448 |
| YEATS4       | 234.464  | 0.528969 | 0.180613 | 2.928739 | 0.003403 | 0.025455 |
| IFT140       | 589.5671 | -0.58842 | 0.200913 | -2.92873 | 0.003404 | 0.025455 |
| NUSAP1       | 4510.868 | 0.337046 | 0.115089 | 2.928566 | 0.003405 | 0.025456 |
| RUSC2        | 753.0965 | -0.58466 | 0.199658 | -2.92829 | 0.003408 | 0.025456 |
| NUP210L      | 54.99444 | 0.88226  | 0.301291 | 2.928267 | 0.003409 | 0.025456 |
| LOC90246     | 44.65602 | -0.92175 | 0.31482  | -2.92786 | 0.003413 | 0.025477 |
| CGB7         | 18.28869 | -1.70308 | 0.581744 | -2.92754 | 0.003417 | 0.025492 |
| MPC1         | 327.1773 | 0.450617 | 0.153946 | 2.927108 | 0.003421 | 0.025509 |
| RBM27        | 3003.176 | 0.357241 | 0.122049 | 2.927027 | 0.003422 | 0.025509 |
| COMMD8       | 351.3324 | 0.460602 | 0.157372 | 2.926841 | 0.003424 | 0.025512 |
| RTCB         | 2569.975 | 0.314647 | 0.107511 | 2.926641 | 0.003426 | 0.025513 |
| ARAP1        | 1171.732 | -0.59587 | 0.203611 | -2.92653 | 0.003428 | 0.025513 |
| PPP2CA       | 4417.275 | 0.370116 | 0.12648  | 2.926281 | 0.00343  | 0.025521 |
| ECT2         | 4523.649 | 0.38024  | 0.129961 | 2.925803 | 0.003436 | 0.025548 |
| LRR1         | 286.112  | 0.479593 | 0.164008 | 2.924204 | 0.003453 | 0.025667 |
| rnu11        | 70.84642 | 0.817897 | 0.279746 | 2.923717 | 0.003459 | 0.025695 |
| PITPNM2      | 485.8411 | -0.59773 | 0.204504 | -2.92285 | 0.003468 | 0.025749 |
| IDE          | 2130.315 | 0.397074 | 0.135856 | 2.922754 | 0.00347  | 0.025749 |
| PPARD        | 508.3622 | -0.61777 | 0.211398 | -2.92231 | 0.003475 | 0.025764 |
| ZNF100       | 555.3233 | 0.516159 | 0.176629 | 2.922276 | 0.003475 | 0.025764 |

|          |          |          |          |          |          |          |
|----------|----------|----------|----------|----------|----------|----------|
| MRPS10   | 1779.421 | 0.424131 | 0.145264 | 2.91973  | 0.003503 | 0.025948 |
| RAD51B   | 142.8861 | 0.652481 | 0.223475 | 2.919701 | 0.003504 | 0.025948 |
| NSUN2    | 2446.757 | 0.334262 | 0.114489 | 2.919611 | 0.003505 | 0.025948 |
| ZNF43    | 589.9655 | 0.54426  | 0.186523 | 2.917922 | 0.003524 | 0.026077 |
| ASUN     | 1301.224 | 0.394946 | 0.135373 | 2.917457 | 0.003529 | 0.026103 |
| TMEM184B | 1357.961 | -0.51917 | 0.177964 | -2.91728 | 0.003531 | 0.026106 |
| MUC1     | 32.66331 | -1.09744 | 0.376212 | -2.91707 | 0.003533 | 0.02611  |
| DHX15    | 4569.276 | 0.346105 | 0.118667 | 2.916602 | 0.003539 | 0.026137 |
| METTL7A  | 263.2332 | 0.502283 | 0.172232 | 2.91632  | 0.003542 | 0.026148 |
| SMARCC1  | 4727.938 | 0.336692 | 0.115508 | 2.914889 | 0.003558 | 0.026256 |
| NKX2-1   | 30.87271 | -1.20022 | 0.411783 | -2.91468 | 0.003561 | 0.026261 |
| AMOTL2   | 2682.14  | -0.38572 | 0.132375 | -2.91383 | 0.00357  | 0.02632  |
| ARSA     | 233.2601 | -0.82907 | 0.284552 | -2.9136  | 0.003573 | 0.026327 |
| TFAP2A   | 967.7362 | -0.36353 | 0.124792 | -2.91305 | 0.003579 | 0.026348 |
| PRIM2    | 674.4287 | 0.557811 | 0.191487 | 2.91305  | 0.003579 | 0.026348 |
| SPATA20  | 1093.054 | -0.67754 | 0.23263  | -2.9125  | 0.003585 | 0.026382 |
| BEND3    | 132.6073 | 0.578005 | 0.198472 | 2.912278 | 0.003588 | 0.026388 |
| NLGN2    | 484.6472 | -0.5046  | 0.173291 | -2.91187 | 0.003593 | 0.02641  |
| cemip    | 274.8503 | -0.50432 | 0.173214 | -2.91153 | 0.003597 | 0.026421 |
| ZNF133   | 618.4399 | -0.37873 | 0.130084 | -2.91144 | 0.003598 | 0.026421 |
| SNORD24  | 18.30244 | 1.376162 | 0.472748 | 2.910985 | 0.003603 | 0.026447 |
| XYLT2    | 839.6552 | -0.63724 | 0.218967 | -2.91021 | 0.003612 | 0.0265   |
| RNASET2  | 210.6823 | -0.5684  | 0.195348 | -2.90969 | 0.003618 | 0.026532 |
| ATP6V1C1 | 2929.496 | 0.343746 | 0.118153 | 2.909328 | 0.003622 | 0.02655  |
| HEXIM1   | 510.3137 | -0.38535 | 0.132482 | -2.90872 | 0.003629 | 0.026589 |
| MRE11    | 2124.327 | 0.436619 | 0.150154 | 2.907811 | 0.00364  | 0.026654 |
| NR1D2    | 2325.249 | 0.386756 | 0.133022 | 2.907463 | 0.003644 | 0.026671 |
| PPA2     | 1144.655 | 0.449887 | 0.154759 | 2.907019 | 0.003649 | 0.026696 |
| FAM133DP | 1000.927 | 0.430181 | 0.148005 | 2.906518 | 0.003655 | 0.026726 |
| RBM25    | 2197.593 | 0.36435  | 0.125366 | 2.906294 | 0.003657 | 0.026729 |
| ACTA2    | 136.0152 | -0.66849 | 0.230024 | -2.90619 | 0.003659 | 0.026729 |
| mettl2a  | 656.0849 | 0.379243 | 0.130504 | 2.905984 | 0.003661 | 0.026734 |
| YIF1A    | 1028.731 | -0.79223 | 0.272714 | -2.90498 | 0.003673 | 0.026801 |
| TPD52L2  | 2857.539 | -0.36552 | 0.125835 | -2.90475 | 0.003675 | 0.026801 |
| CDCA7L   | 1673.458 | 0.374561 | 0.128954 | 2.904614 | 0.003677 | 0.026801 |
| TMEM39A  | 1841.459 | -0.44295 | 0.152501 | -2.9046  | 0.003677 | 0.026801 |
| SNORD18B | 23.83366 | 1.39899  | 0.48181  | 2.903612 | 0.003689 | 0.026873 |
| A1BG     | 90.06338 | -0.837   | 0.288287 | -2.90335 | 0.003692 | 0.026883 |
| LENG8    | 1302.978 | -0.62924 | 0.216769 | -2.90283 | 0.003698 | 0.026916 |
| RRAGA    | 1246.165 | -0.3455  | 0.119047 | -2.90219 | 0.003706 | 0.026957 |
| STX16    | 2423.28  | -0.41064 | 0.141531 | -2.90144 | 0.003714 | 0.027009 |
| PAGR1    | 677.5312 | -0.367   | 0.126527 | -2.9006  | 0.003725 | 0.027069 |
| FASTKD1  | 775.7978 | 0.473409 | 0.163233 | 2.900198 | 0.003729 | 0.027091 |
| fancm    | 430.8747 | 0.600776 | 0.207175 | 2.899851 | 0.003733 | 0.027101 |
| CUL2     | 1203.649 | 0.388967 | 0.134141 | 2.899678 | 0.003735 | 0.027101 |
| ABCD3    | 3515.092 | 0.375958 | 0.129657 | 2.89964  | 0.003736 | 0.027101 |
| TRAF3IP1 | 554.1542 | 0.376611 | 0.129888 | 2.899491 | 0.003738 | 0.027101 |
| DAPK3    | 309.4426 | -0.78798 | 0.271784 | -2.89928 | 0.00374  | 0.027107 |
| GPRIN1   | 398.8723 | 0.496395 | 0.171225 | 2.899077 | 0.003743 | 0.027112 |
| CRAT     | 673.8422 | -0.56538 | 0.195051 | -2.89861 | 0.003748 | 0.027139 |

|          |          |          |          |          |          |          |
|----------|----------|----------|----------|----------|----------|----------|
| CAAP1    | 423.309  | 0.44111  | 0.152194 | 2.89833  | 0.003752 | 0.027151 |
| SNX19    | 2689.245 | 0.301244 | 0.104001 | 2.896553 | 0.003773 | 0.027292 |
| ZFP91    | 3706.593 | 0.339316 | 0.117172 | 2.895873 | 0.003781 | 0.027331 |
| FASTK    | 637.9064 | -0.76548 | 0.264341 | -2.89582 | 0.003782 | 0.027331 |
| FLOT1    | 5832.12  | -0.4834  | 0.166988 | -2.89482 | 0.003794 | 0.027398 |
| RRP36    | 1304.871 | 0.320419 | 0.11069  | 2.894758 | 0.003795 | 0.027398 |
| ELOVL6   | 520.852  | 0.536884 | 0.185492 | 2.894383 | 0.003799 | 0.027417 |
| AQP3     | 32.51511 | -1.02362 | 0.353748 | -2.89365 | 0.003808 | 0.027468 |
| CD99     | 4936.777 | -0.43355 | 0.149884 | -2.89259 | 0.003821 | 0.027547 |
| ZIC4     | 96.16453 | -0.6496  | 0.224596 | -2.89228 | 0.003825 | 0.027547 |
| KIAA1841 | 444.6825 | 0.437017 | 0.151103 | 2.892174 | 0.003826 | 0.027547 |
| CD83     | 62.43496 | 0.758118 | 0.262153 | 2.891895 | 0.003829 | 0.027558 |
| KIF24    | 520.3521 | 0.443604 | 0.153412 | 2.891586 | 0.003833 | 0.027571 |
| ELF4     | 1396.937 | -0.34044 | 0.117739 | -2.89146 | 0.003835 | 0.027571 |
| TRAPPC1  | 713.285  | -0.45632 | 0.157874 | -2.89039 | 0.003848 | 0.027652 |
| SEMA5A   | 1396.562 | -0.35207 | 0.121863 | -2.88906 | 0.003864 | 0.027756 |
| HPS3     | 4124.292 | -0.38844 | 0.134487 | -2.88831 | 0.003873 | 0.02781  |
| YIF1B    | 452.5175 | -0.6878  | 0.23815  | -2.8881  | 0.003876 | 0.027815 |
| HADH     | 913.9854 | 0.337624 | 0.116939 | 2.887187 | 0.003887 | 0.027883 |
| P3H4     | 830.7247 | -0.69506 | 0.240773 | -2.88681 | 0.003892 | 0.027903 |
| MDH1     | 3321.048 | 0.295575 | 0.102395 | 2.886632 | 0.003894 | 0.027903 |
| RHOT1    | 1623.851 | 0.36921  | 0.127909 | 2.886517 | 0.003895 | 0.027903 |
| CDK8     | 511.7165 | 0.397038 | 0.137557 | 2.886359 | 0.003897 | 0.027905 |
| FAM175B  | 642.3161 | 0.360688 | 0.124986 | 2.885819 | 0.003904 | 0.027936 |
| EPC2     | 653.9727 | 0.377114 | 0.130696 | 2.885431 | 0.003909 | 0.027948 |
| LMF1     | 141.7461 | -0.82128 | 0.284706 | -2.88465 | 0.003919 | 0.028005 |
| NUDT5    | 904.1083 | 0.340087 | 0.117965 | 2.88295  | 0.00394  | 0.028143 |
| mocs2    | 805.7082 | 0.35576  | 0.123409 | 2.882776 | 0.003942 | 0.028146 |
| MMP19    | 147.4769 | -0.58697 | 0.203684 | -2.88177 | 0.003954 | 0.028201 |
| BUB1B    | 2342.654 | 0.473628 | 0.164354 | 2.881757 | 0.003955 | 0.028201 |
| TAPBP    | 4582.306 | -0.51318 | 0.1781   | -2.88144 | 0.003959 | 0.028201 |
| KDM2A    | 2572.309 | -0.31647 | 0.10983  | -2.88143 | 0.003959 | 0.028201 |
| RPL10    | 8824.844 | -0.46598 | 0.161785 | -2.88024 | 0.003974 | 0.028294 |
| PRC1     | 7083.219 | 0.316727 | 0.109984 | 2.879768 | 0.00398  | 0.028314 |
| TNC      | 1468.719 | -0.63826 | 0.221638 | -2.87974 | 0.00398  | 0.028314 |
| CGRRF1   | 108.5295 | 0.633454 | 0.220026 | 2.878993 | 0.003989 | 0.028363 |
| VPS33A   | 387.5134 | 0.418937 | 0.145532 | 2.878647 | 0.003994 | 0.028363 |
| JUN      | 3150.272 | 0.459753 | 0.159722 | 2.878459 | 0.003996 | 0.028363 |
| ZNF358   | 277.5571 | -0.7763  | 0.269697 | -2.87842 | 0.003997 | 0.028363 |
| QTRT2    | 1082.978 | 0.404937 | 0.140687 | 2.878274 | 0.003999 | 0.028363 |
| PSMG2    | 721.9869 | 0.402228 | 0.139756 | 2.878069 | 0.004001 | 0.028363 |
| CLGN     | 30.83314 | 1.169671 | 0.406444 | 2.877813 | 0.004004 | 0.028363 |
| TMEM133  | 248.0529 | 0.497009 | 0.172705 | 2.877793 | 0.004005 | 0.028363 |
| ATP5C1   | 3283.355 | 0.352816 | 0.122601 | 2.877753 | 0.004005 | 0.028363 |
| MICU2    | 1092.847 | 0.485901 | 0.168849 | 2.87773  | 0.004005 | 0.028363 |
| RGS9     | 116.2938 | -0.70991 | 0.246702 | -2.8776  | 0.004007 | 0.028363 |
| KNTC1    | 4970.637 | 0.412467 | 0.143377 | 2.876798 | 0.004017 | 0.028421 |
| ITGA1    | 560.4915 | -0.3932  | 0.13671  | -2.87615 | 0.004026 | 0.028467 |
| SLC41A1  | 1240.989 | -0.33796 | 0.11758  | -2.87425 | 0.00405  | 0.028625 |
| SLTM     | 2297.842 | 0.343933 | 0.119666 | 2.87411  | 0.004052 | 0.028625 |

|           |          |          |          |          |          |          |
|-----------|----------|----------|----------|----------|----------|----------|
| GLTP      | 586.7717 | -0.36421 | 0.126743 | -2.87365 | 0.004058 | 0.028654 |
| PRKDC     | 25452.4  | 0.440361 | 0.153285 | 2.872822 | 0.004068 | 0.028716 |
| POLL      | 256.1228 | -0.64324 | 0.223927 | -2.87256 | 0.004072 | 0.028726 |
| MAGEE1    | 208.0793 | 0.480656 | 0.16736  | 2.871984 | 0.004079 | 0.028766 |
| KLHL8     | 807.8922 | 0.395029 | 0.137566 | 2.871559 | 0.004085 | 0.028791 |
| C14orf1   | 524.3429 | -0.40038 | 0.139493 | -2.87022 | 0.004102 | 0.028901 |
| CECR5     | 717.329  | -0.59706 | 0.208048 | -2.8698  | 0.004107 | 0.028925 |
| TGS1      | 1258.678 | 0.405215 | 0.141273 | 2.868317 | 0.004127 | 0.029048 |
| PHF5A     | 890.473  | 0.345113 | 0.12033  | 2.868039 | 0.00413  | 0.02906  |
| KIF2A     | 2236.136 | 0.3954   | 0.137876 | 2.86779  | 0.004134 | 0.029067 |
| TMEM214   | 2042.791 | -0.5847  | 0.203892 | -2.86767 | 0.004135 | 0.029067 |
| MC1R      | 134.4787 | -0.7487  | 0.261137 | -2.86709 | 0.004143 | 0.029095 |
| SND1      | 8576.739 | -0.33921 | 0.118323 | -2.86683 | 0.004146 | 0.029106 |
| LTBP2     | 95.9111  | -0.66894 | 0.233377 | -2.86635 | 0.004152 | 0.029136 |
| PLEKHS1   | 40.77    | 1.17779  | 0.411195 | 2.864311 | 0.004179 | 0.029306 |
| U2SURP    | 5889.019 | 0.419282 | 0.146386 | 2.864227 | 0.00418  | 0.029306 |
| SEMA3A    | 1630.724 | -0.53184 | 0.185699 | -2.86401 | 0.004183 | 0.029313 |
| WDR12     | 825.3699 | 0.386024 | 0.134795 | 2.863792 | 0.004186 | 0.029319 |
| SPDL1     | 1595.2   | 0.528265 | 0.184491 | 2.863358 | 0.004192 | 0.029342 |
| ISCU      | 705.5128 | 0.369165 | 0.128932 | 2.863241 | 0.004193 | 0.029342 |
| MVD       | 502.7836 | -0.82902 | 0.28955  | -2.86312 | 0.004195 | 0.029342 |
| NIFK      | 953.1815 | 0.399209 | 0.13945  | 2.862742 | 0.0042   | 0.029363 |
| LINC00663 | 71.12888 | -0.80046 | 0.279667 | -2.86219 | 0.004207 | 0.029401 |
| NAA20     | 1417.888 | 0.334647 | 0.116927 | 2.862021 | 0.004209 | 0.029404 |
| FAXC      | 115.1528 | 0.602488 | 0.210549 | 2.861514 | 0.004216 | 0.029437 |
| Mdn1      | 3915.764 | 0.380928 | 0.13317  | 2.860466 | 0.00423  | 0.029521 |
| STRIP1    | 881.9725 | 0.357492 | 0.125008 | 2.859752 | 0.00424  | 0.029575 |
| EMC9      | 87.62428 | -0.67614 | 0.236474 | -2.85926 | 0.004246 | 0.029598 |
| AHCTF1    | 3977.516 | 0.415316 | 0.145255 | 2.859215 | 0.004247 | 0.029598 |
| SUCLA2    | 1852.821 | 0.3519   | 0.123094 | 2.85878  | 0.004253 | 0.029617 |
| BAIAP2L1  | 682.4503 | -0.35464 | 0.124054 | -2.85873 | 0.004253 | 0.029617 |
| PDE7A     | 1340.96  | 0.40721  | 0.142465 | 2.858304 | 0.004259 | 0.029643 |
| POP4      | 552.6051 | 0.37084  | 0.12975  | 2.858112 | 0.004262 | 0.029648 |
| TAF5      | 284.0446 | 0.537636 | 0.188174 | 2.857112 | 0.004275 | 0.029728 |
| gbp1      | 829.3934 | 0.429598 | 0.150398 | 2.856397 | 0.004285 | 0.029781 |
| AKR1C3    | 11916    | 0.523841 | 0.183454 | 2.855432 | 0.004298 | 0.029859 |
| Uqcrh     | 4795.147 | 0.292356 | 0.102402 | 2.854968 | 0.004304 | 0.029889 |
| AURKA     | 3880.39  | 0.339583 | 0.11898  | 2.854114 | 0.004316 | 0.029956 |
| FDXACB1   | 189.0455 | 0.480217 | 0.168308 | 2.853202 | 0.004328 | 0.030028 |
| RAB10     | 4657.455 | 0.351209 | 0.123148 | 2.851925 | 0.004346 | 0.030132 |
| TMCO3     | 2902.764 | -0.29713 | 0.10419  | -2.85182 | 0.004347 | 0.030132 |
| THOC7     | 1300.776 | 0.353817 | 0.124088 | 2.851332 | 0.004354 | 0.030151 |
| IL7R      | 346.4588 | 0.766453 | 0.268843 | 2.850934 | 0.004359 | 0.030163 |
| MRAS      | 527.1031 | 0.389216 | 0.136532 | 2.850738 | 0.004362 | 0.030163 |
| DNAJC6    | 237.5493 | 0.488216 | 0.171266 | 2.850634 | 0.004363 | 0.030163 |
| PKN1      | 1197.809 | -0.66511 | 0.233396 | -2.84969 | 0.004376 | 0.030239 |
| FAM136A   | 1080.506 | 0.361662 | 0.127054 | 2.84653  | 0.00442  | 0.030507 |
| SOBP      | 319.8569 | 0.514981 | 0.18092  | 2.846454 | 0.004421 | 0.030507 |
| dnmbp     | 1034.671 | -0.35296 | 0.124012 | -2.84621 | 0.004424 | 0.030507 |
| CRNKL1    | 1840.415 | 0.342899 | 0.120477 | 2.84618  | 0.004425 | 0.030507 |

|              |          |          |          |          |          |          |
|--------------|----------|----------|----------|----------|----------|----------|
| HDAC2        | 2456.041 | 0.397813 | 0.139793 | 2.845734 | 0.004431 | 0.030536 |
| CALM1        | 2531.956 | 0.358507 | 0.126012 | 2.845019 | 0.004441 | 0.030577 |
| ADGRG1       | 105.0122 | -0.69489 | 0.244251 | -2.84497 | 0.004442 | 0.030577 |
| PRICKLE2     | 1248.804 | -0.32895 | 0.115632 | -2.84481 | 0.004444 | 0.030577 |
| ANKRD37      | 34.76745 | -1.18486 | 0.41651  | -2.84473 | 0.004445 | 0.030577 |
| NDUFA6       | 2203.181 | 0.314909 | 0.110718 | 2.844241 | 0.004452 | 0.030611 |
| BRD8         | 2265.481 | 0.312311 | 0.109829 | 2.843607 | 0.004461 | 0.030658 |
| LINC00847    | 216.7869 | -0.61162 | 0.215125 | -2.84309 | 0.004468 | 0.030694 |
| SLC26A1      | 17.46633 | -1.48047 | 0.520799 | -2.84268 | 0.004474 | 0.03072  |
| SLC39A7      | 5146.295 | -0.49417 | 0.173862 | -2.84231 | 0.004479 | 0.030742 |
| SERAC1       | 345.0324 | 0.575522 | 0.202516 | 2.841855 | 0.004485 | 0.030772 |
| ZNF664       | 1974.079 | 0.341524 | 0.1202   | 2.841299 | 0.004493 | 0.030807 |
| TMEM189      | 941.2224 | -0.40415 | 0.142244 | -2.84121 | 0.004494 | 0.030807 |
| NDUFA12      | 836.1491 | 0.369008 | 0.129894 | 2.840848 | 0.004499 | 0.030829 |
| RSPH3        | 265.0336 | -0.53586 | 0.188746 | -2.83909 | 0.004524 | 0.030973 |
| AFG3L1P      | 377.0807 | 0.407127 | 0.143402 | 2.83907  | 0.004525 | 0.030973 |
| ZNF710       | 416.6317 | -0.46821 | 0.165007 | -2.83752 | 0.004547 | 0.03111  |
| LINC00115    | 50.87556 | -0.8923  | 0.31448  | -2.83738 | 0.004549 | 0.03111  |
| Psg9         | 50.82628 | -0.91045 | 0.3209   | -2.83718 | 0.004551 | 0.031116 |
| LIMD1        | 644.8005 | -0.39819 | 0.140364 | -2.83688 | 0.004556 | 0.031131 |
| CCDC66       | 514.74   | 0.477534 | 0.168343 | 2.836674 | 0.004559 | 0.031132 |
| KLHL2        | 700.991  | 0.401985 | 0.141714 | 2.836596 | 0.00456  | 0.031132 |
| WASF3        | 186.765  | 0.553398 | 0.195129 | 2.83607  | 0.004567 | 0.031169 |
| POMP         | 2987.636 | 0.371248 | 0.131038 | 2.833126 | 0.00461  | 0.031444 |
| CHAC2        | 67.69396 | 0.927177 | 0.32729  | 2.832894 | 0.004613 | 0.031453 |
| ASAH1        | 912.8038 | 0.377341 | 0.133247 | 2.831885 | 0.004627 | 0.031538 |
| ATMIN        | 1595.317 | 0.325601 | 0.114985 | 2.831681 | 0.00463  | 0.031544 |
| FLJ23867     | 101.708  | -0.73206 | 0.258578 | -2.8311  | 0.004639 | 0.031574 |
| ZNF471       | 440.8266 | -0.4188  | 0.147929 | -2.8311  | 0.004639 | 0.031574 |
| DSEL         | 909.0731 | 0.371715 | 0.131325 | 2.830503 | 0.004647 | 0.031619 |
| IQCG         | 385.1948 | -0.44562 | 0.157458 | -2.83007 | 0.004654 | 0.031648 |
| MAPKAPK5     | 897.4782 | 0.327587 | 0.115789 | 2.829166 | 0.004667 | 0.031708 |
| EID2         | 224.9056 | 0.505341 | 0.178618 | 2.829166 | 0.004667 | 0.031708 |
| HDDC2        | 819.1115 | 0.34264  | 0.121115 | 2.82904  | 0.004669 | 0.031708 |
| HLA-B        | 8298.653 | -0.54089 | 0.191269 | -2.82789 | 0.004686 | 0.031808 |
| HCG27        | 71.36792 | -0.72937 | 0.257941 | -2.82767 | 0.004689 | 0.031808 |
| ARHGDIA      | 797.9846 | -0.58122 | 0.205552 | -2.82761 | 0.00469  | 0.031808 |
| WDR75        | 1279.985 | 0.388168 | 0.1373   | 2.827154 | 0.004696 | 0.031839 |
| PFDN4        | 843.1044 | 0.468977 | 0.165901 | 2.826847 | 0.004701 | 0.031856 |
| NEMP1        | 2433.24  | 0.358933 | 0.126992 | 2.826415 | 0.004707 | 0.031885 |
| LOC100129917 | 269.3705 | -0.50293 | 0.177967 | -2.82596 | 0.004714 | 0.031916 |
| nbl1         | 282.1307 | -0.69303 | 0.245343 | -2.82472 | 0.004732 | 0.032026 |
| TMEM63B      | 691.4652 | -0.43488 | 0.153988 | -2.8241  | 0.004741 | 0.032074 |
| RNPEPL1      | 382.0182 | -0.79808 | 0.282722 | -2.82284 | 0.00476  | 0.032186 |
| RPL28        | 2747.358 | -0.60844 | 0.215584 | -2.82231 | 0.004768 | 0.032225 |
| DHX29        | 2310.137 | 0.377296 | 0.133728 | 2.821368 | 0.004782 | 0.032297 |
| HCN2         | 351.7106 | -0.68831 | 0.243968 | -2.82131 | 0.004783 | 0.032297 |
| CTSD         | 7980.383 | -1.22318 | 0.433598 | -2.821   | 0.004787 | 0.032315 |
| FAM49B       | 1883.533 | 0.375729 | 0.133214 | 2.820489 | 0.004795 | 0.032352 |
| MFAP4        | 35.65035 | -1.05117 | 0.372764 | -2.81993 | 0.004803 | 0.032394 |

|            |          |          |          |          |          |          |
|------------|----------|----------|----------|----------|----------|----------|
| B9D1       | 177.3928 | -0.69801 | 0.247556 | -2.81961 | 0.004808 | 0.032412 |
| CD69       | 17.77335 | -1.38205 | 0.490243 | -2.81912 | 0.004816 | 0.032448 |
| RARRES2    | 57.49642 | -0.78759 | 0.279597 | -2.81688 | 0.004849 | 0.032661 |
| TEX22      | 17.96161 | -1.67404 | 0.594343 | -2.81661 | 0.004853 | 0.032673 |
| GSAP       | 336.4832 | -0.48888 | 0.17358  | -2.81644 | 0.004856 | 0.032677 |
| TMEM138    | 647.0592 | 0.367202 | 0.130498 | 2.813856 | 0.004895 | 0.032926 |
| SLC7A5P2   | 359.6811 | -0.42534 | 0.151191 | -2.81325 | 0.004904 | 0.032974 |
| bri3       | 1449.366 | -0.51951 | 0.184756 | -2.81189 | 0.004925 | 0.033099 |
| OGFRL1     | 272.9856 | 0.474888 | 0.168949 | 2.810842 | 0.004941 | 0.033193 |
| NSUN6      | 299.2595 | 0.515739 | 0.183505 | 2.810498 | 0.004946 | 0.033214 |
| dlg4       | 622.3387 | -0.51654 | 0.183811 | -2.81016 | 0.004952 | 0.033234 |
| NCOA5      | 591.2344 | 0.430387 | 0.153178 | 2.809714 | 0.004959 | 0.033266 |
| METTL14    | 603.6312 | 0.405929 | 0.144483 | 2.809526 | 0.004961 | 0.033271 |
| PEX1       | 1616.204 | 0.380214 | 0.135366 | 2.808788 | 0.004973 | 0.033333 |
| CASP6      | 235.1044 | 0.480791 | 0.171202 | 2.808325 | 0.00498  | 0.033366 |
| FBXO22     | 627.2161 | 0.386215 | 0.137583 | 2.807145 | 0.004998 | 0.033474 |
| ATP1A1-AS1 | 118.9331 | -0.5662  | 0.201715 | -2.80694 | 0.005002 | 0.033476 |
| GEN1       | 820.4946 | 0.592261 | 0.211009 | 2.806811 | 0.005003 | 0.033476 |
| CCDC24     | 147.9468 | -0.68059 | 0.242488 | -2.80671 | 0.005005 | 0.033476 |
| RFTN1      | 1368.785 | -0.424   | 0.151104 | -2.80604 | 0.005015 | 0.033526 |
| ZNF785     | 319.4485 | -0.48685 | 0.173507 | -2.80595 | 0.005017 | 0.033526 |
| NBEAL2     | 290.8341 | -0.60629 | 0.216089 | -2.80576 | 0.00502  | 0.033531 |
| SLC25A3    | 6936.451 | 0.296727 | 0.10577  | 2.805389 | 0.005026 | 0.033555 |
| SLC46A3    | 568.1591 | 0.437382 | 0.155941 | 2.804799 | 0.005035 | 0.0336   |
| CDK18      | 203.4464 | -0.65381 | 0.233113 | -2.80469 | 0.005037 | 0.0336   |
| TBCA       | 1742.155 | 0.325831 | 0.116184 | 2.804446 | 0.00504  | 0.03361  |
| NFIB       | 583.6698 | 0.423262 | 0.150953 | 2.803939 | 0.005048 | 0.033646 |
| DDX58      | 272.2034 | 0.546107 | 0.19484  | 2.802851 | 0.005065 | 0.033733 |
| IQSEC2     | 196.9423 | -0.53442 | 0.190692 | -2.80252 | 0.00507  | 0.033753 |
| BSCL2      | 944.8532 | -0.48335 | 0.172522 | -2.80168 | 0.005084 | 0.033826 |
| RWDD4      | 630.7171 | 0.481453 | 0.171866 | 2.801329 | 0.005089 | 0.033849 |
| CAPNS1     | 3507.556 | -0.47177 | 0.168528 | -2.79933 | 0.005121 | 0.034031 |
| GNB2       | 1187.03  | -0.71617 | 0.255838 | -2.79932 | 0.005121 | 0.034031 |
| SLC34A3    | 16.71462 | -1.40822 | 0.503398 | -2.79743 | 0.005151 | 0.034216 |
| GLDN       | 2002.877 | 0.417909 | 0.149427 | 2.796751 | 0.005162 | 0.034269 |
| TNFRSF25   | 162.3588 | -0.64007 | 0.228878 | -2.79654 | 0.005165 | 0.034269 |
| MAP2K6     | 155.4098 | 0.669634 | 0.239454 | 2.796508 | 0.005166 | 0.034269 |
| GPR173     | 111.1734 | -0.60917 | 0.217888 | -2.79581 | 0.005177 | 0.034309 |
| COP55      | 1587.849 | 0.315049 | 0.112692 | 2.795663 | 0.005179 | 0.034309 |
| HMG2       | 6416.419 | 0.341032 | 0.121989 | 2.795595 | 0.00518  | 0.034309 |
| FAM89A     | 194.9435 | 0.514244 | 0.183949 | 2.795577 | 0.005181 | 0.034309 |
| ARHGAP1    | 1124.525 | -0.54808 | 0.196087 | -2.7951  | 0.005188 | 0.034346 |
| UBE2W      | 1308.441 | 0.389    | 0.139185 | 2.794837 | 0.005193 | 0.034358 |
| SPTA1      | 27.37705 | 1.118803 | 0.400384 | 2.794323 | 0.005201 | 0.034397 |
| PRPF40A    | 5325.919 | 0.383623 | 0.137293 | 2.794199 | 0.005203 | 0.034397 |
| RABAC1     | 403.3369 | -0.78596 | 0.281314 | -2.79388 | 0.005208 | 0.034415 |
| FKBP2      | 702.2152 | -0.60601 | 0.216936 | -2.7935  | 0.005214 | 0.034441 |
| FAM196A    | 98.78693 | 0.639799 | 0.229132 | 2.792275 | 0.005234 | 0.034543 |
| IPO11      | 1864.68  | 0.392422 | 0.140572 | 2.791611 | 0.005245 | 0.034599 |
| NDUFB9     | 1693.392 | 0.329552 | 0.11809  | 2.79068  | 0.00526  | 0.034676 |

|              |          |          |          |          |          |          |
|--------------|----------|----------|----------|----------|----------|----------|
| DTD2         | 325.0554 | 0.458702 | 0.164373 | 2.790618 | 0.005261 | 0.034676 |
| PRDX1        | 44072.17 | 0.417055 | 0.149488 | 2.789889 | 0.005273 | 0.034739 |
| DECR1        | 1239.268 | 0.351095 | 0.125963 | 2.787289 | 0.005315 | 0.034989 |
| ZNF436-AS1   | 416.6883 | -0.54509 | 0.195597 | -2.78681 | 0.005323 | 0.035012 |
| MAP4         | 7646.918 | -0.27649 | 0.099213 | -2.7868  | 0.005323 | 0.035012 |
| COBLL1       | 478.0004 | 0.47671  | 0.171125 | 2.785743 | 0.005341 | 0.035111 |
| APC2         | 87.7159  | -0.86446 | 0.310333 | -2.78557 | 0.005343 | 0.035115 |
| SCG2         | 445.1864 | 0.478701 | 0.171895 | 2.784852 | 0.005355 | 0.035171 |
| PAXBP1       | 1887.086 | 0.378448 | 0.135899 | 2.784779 | 0.005356 | 0.035171 |
| PCBP3        | 226.5512 | -0.49019 | 0.176072 | -2.78401 | 0.005369 | 0.035239 |
| MRPS17       | 473.5914 | 0.382832 | 0.137522 | 2.783792 | 0.005373 | 0.035248 |
| ISYNA1       | 104.0919 | -0.83247 | 0.299101 | -2.78324 | 0.005382 | 0.035293 |
| NRCAM        | 135.6528 | 0.592938 | 0.213058 | 2.782993 | 0.005386 | 0.035305 |
| TBX6         | 38.75859 | -1.03396 | 0.371582 | -2.7826  | 0.005393 | 0.035333 |
| TUT1         | 548.834  | -0.49189 | 0.176791 | -2.78234 | 0.005397 | 0.035341 |
| ttc30a       | 754.5889 | -0.34974 | 0.125706 | -2.78225 | 0.005398 | 0.035341 |
| TRMT12       | 408.5157 | 0.416388 | 0.149686 | 2.781748 | 0.005407 | 0.035381 |
| MIPOL1       | 195.9529 | 0.537721 | 0.193379 | 2.780664 | 0.005425 | 0.035484 |
| RAB40C       | 160.1546 | -0.61697 | 0.222034 | -2.77873 | 0.005457 | 0.035681 |
| CAPZB        | 2562.568 | -0.36677 | 0.132142 | -2.77562 | 0.00551  | 0.036009 |
| C12orf57     | 276.0339 | -0.8555  | 0.308265 | -2.77521 | 0.005517 | 0.036039 |
| RBMS2        | 1648.759 | -0.38244 | 0.137854 | -2.77423 | 0.005533 | 0.036132 |
| znf519       | 553.7815 | 0.50788  | 0.183104 | 2.773716 | 0.005542 | 0.036174 |
| PIEZO2       | 413.4838 | -0.39984 | 0.144216 | -2.77252 | 0.005562 | 0.036276 |
| LOC100507022 | 26.27324 | -1.2091  | 0.436253 | -2.77155 | 0.005579 | 0.036369 |
| RNASEH2B     | 260.4775 | 0.453531 | 0.163696 | 2.770567 | 0.005596 | 0.036464 |
| DENND4B      | 646.5463 | -0.42754 | 0.154359 | -2.76978 | 0.005609 | 0.036537 |
| RPP14        | 570.0994 | 0.364095 | 0.13146  | 2.769614 | 0.005612 | 0.03654  |
| LRRFIP1      | 4520.424 | -0.38732 | 0.139873 | -2.76909 | 0.005621 | 0.036583 |
| tmem199      | 346.7141 | 0.417499 | 0.150788 | 2.768775 | 0.005627 | 0.036595 |
| ARPC5L       | 354.3088 | 0.394369 | 0.142442 | 2.768635 | 0.005629 | 0.036595 |
| RECQL5       | 664.2169 | -0.41876 | 0.151256 | -2.76854 | 0.005631 | 0.036595 |
| ARHGEF18     | 735.7457 | -0.48737 | 0.176043 | -2.76844 | 0.005633 | 0.036595 |
| LSS          | 1752.926 | -0.53453 | 0.193121 | -2.76784 | 0.005643 | 0.036647 |
| POLE3        | 1316.568 | 0.32037  | 0.115791 | 2.766792 | 0.005661 | 0.036748 |
| ttc21a       | 102.7515 | -0.61975 | 0.224005 | -2.76667 | 0.005663 | 0.036748 |
| PAX2         | 24.23417 | -1.11638 | 0.403536 | -2.7665  | 0.005666 | 0.036752 |
| C11orf58     | 4169.812 | 0.312881 | 0.113133 | 2.765598 | 0.005682 | 0.036838 |
| MAPRE1       | 4274.991 | 0.353034 | 0.127681 | 2.764982 | 0.005693 | 0.036892 |
| MVB12A       | 235.9422 | -0.7207  | 0.26073  | -2.76415 | 0.005707 | 0.036959 |
| NNAT         | 64.36713 | -0.82303 | 0.297757 | -2.76411 | 0.005708 | 0.036959 |
| PLXNC1       | 113.1041 | 0.610527 | 0.220922 | 2.763537 | 0.005718 | 0.037009 |
| STRAP        | 2812.067 | 0.339422 | 0.122848 | 2.762954 | 0.005728 | 0.03706  |
| gk           | 267.4256 | 0.495795 | 0.17947  | 2.762549 | 0.005735 | 0.037083 |
| DPYSL4       | 344.385  | -0.62281 | 0.225454 | -2.76248 | 0.005736 | 0.037083 |
| SGPL1        | 1051.372 | 0.317011 | 0.114785 | 2.761782 | 0.005749 | 0.037146 |
| C20orf203    | 24.40917 | -1.2781  | 0.462944 | -2.76082 | 0.005766 | 0.037229 |
| CD70         | 49.12286 | -0.82491 | 0.298973 | -2.75914 | 0.005795 | 0.037401 |
| C3           | 597.9884 | -0.55986 | 0.202974 | -2.75827 | 0.005811 | 0.037474 |
| PDP1         | 2481.975 | 0.356197 | 0.129144 | 2.758145 | 0.005813 | 0.037474 |

|           |          |          |          |          |          |          |
|-----------|----------|----------|----------|----------|----------|----------|
| GUSBP1    | 643.1519 | -0.38675 | 0.140224 | -2.7581  | 0.005814 | 0.037474 |
| GM2A      | 2262.051 | -0.35069 | 0.127163 | -2.75779 | 0.005819 | 0.037493 |
| PER2      | 580.8656 | -0.45686 | 0.165685 | -2.75742 | 0.005826 | 0.037519 |
| RAB20     | 400.5412 | -0.46523 | 0.168776 | -2.75649 | 0.005843 | 0.037611 |
| MINPP1    | 456.7394 | 0.446246 | 0.161906 | 2.756197 | 0.005848 | 0.037629 |
| C11orf24  | 624.5925 | -0.48194 | 0.174872 | -2.75599 | 0.005852 | 0.037638 |
| ABCB6     | 2222.104 | -0.42049 | 0.152621 | -2.75513 | 0.005867 | 0.037721 |
| PLEC      | 8408.487 | -0.75365 | 0.273568 | -2.75489 | 0.005871 | 0.037722 |
| Snord45b  | 72.09388 | 0.824462 | 0.299277 | 2.754846 | 0.005872 | 0.037722 |
| TMEM33    | 2630.371 | 0.363777 | 0.132088 | 2.75405  | 0.005886 | 0.037798 |
| ARSD      | 425.3079 | -0.37004 | 0.134371 | -2.75384 | 0.00589  | 0.037805 |
| TUBGCP5   | 743.3037 | 0.412667 | 0.149858 | 2.753714 | 0.005892 | 0.037805 |
| GDE1      | 2152.013 | 0.298242 | 0.108322 | 2.753302 | 0.0059   | 0.037837 |
| NUDT21    | 6662.104 | 0.33254  | 0.12091  | 2.750319 | 0.005954 | 0.038168 |
| SNORD18A  | 12.63511 | 1.589018 | 0.577802 | 2.750107 | 0.005958 | 0.038176 |
| HOXD10    | 382.2465 | -0.39447 | 0.143469 | -2.74954 | 0.005968 | 0.038226 |
| TCEB1     | 1215.568 | 0.367241 | 0.133592 | 2.748979 | 0.005978 | 0.038267 |
| ADAM22    | 241.5513 | 0.493451 | 0.179507 | 2.748927 | 0.005979 | 0.038267 |
| MAFK      | 240.8491 | -0.79093 | 0.28774  | -2.74878 | 0.005982 | 0.038267 |
| LARP4     | 3274.48  | 0.429473 | 0.156251 | 2.748605 | 0.005985 | 0.038272 |
| SLC36A1   | 259.3451 | 0.468646 | 0.170522 | 2.748305 | 0.00599  | 0.038292 |
| STXBP1    | 468.3504 | -0.43274 | 0.157492 | -2.74773 | 0.006001 | 0.038343 |
| MFS10     | 271.2063 | -0.76972 | 0.280169 | -2.74732 | 0.006008 | 0.038359 |
| PLS1      | 104.7633 | 0.804766 | 0.292927 | 2.747322 | 0.006008 | 0.038359 |
| ATP7A     | 2903.083 | -0.3243  | 0.118062 | -2.74689 | 0.006016 | 0.038386 |
| YWHAH     | 2590.442 | 0.336291 | 0.122429 | 2.746823 | 0.006018 | 0.038386 |
| METAP2    | 2452.902 | 0.348328 | 0.12682  | 2.746639 | 0.006021 | 0.038391 |
| ISOC1     | 613.0923 | 0.341943 | 0.124505 | 2.746431 | 0.006025 | 0.0384   |
| TPR       | 8244.838 | 0.366582 | 0.1335   | 2.745923 | 0.006034 | 0.038443 |
| trik      | 1471.121 | -0.44982 | 0.16385  | -2.74529 | 0.006046 | 0.038486 |
| CD27-AS1  | 283.7966 | -0.55679 | 0.202876 | -2.7445  | 0.00606  | 0.038554 |
| WDCP      | 416.8933 | 0.402749 | 0.146751 | 2.744438 | 0.006061 | 0.038554 |
| ZC3H13    | 2132.125 | 0.328404 | 0.119701 | 2.743542 | 0.006078 | 0.038644 |
| TOR1A     | 634.1079 | 0.345205 | 0.125834 | 2.743339 | 0.006082 | 0.038651 |
| OSER1-AS1 | 251.2293 | -0.46283 | 0.168793 | -2.74203 | 0.006106 | 0.03879  |
| BLOC1S2   | 332.4151 | 0.41376  | 0.15091  | 2.741761 | 0.006111 | 0.038806 |
| SRPX      | 597.3375 | -0.3478  | 0.126877 | -2.7412  | 0.006121 | 0.038856 |
| KREMEN1   | 1055.704 | -0.47956 | 0.175038 | -2.73974 | 0.006149 | 0.039013 |
| DHX35     | 818.6343 | 0.342588 | 0.12505  | 2.739599 | 0.006151 | 0.039014 |
| SLC5A6    | 395.7807 | 0.492965 | 0.179973 | 2.739108 | 0.006161 | 0.039045 |
| ABHD1     | 40.08664 | -0.92616 | 0.33813  | -2.73907 | 0.006161 | 0.039045 |
| SRP19     | 943.8903 | 0.379296 | 0.138554 | 2.737541 | 0.00619  | 0.039197 |
| PAX6      | 141.7695 | 0.620498 | 0.226673 | 2.737417 | 0.006192 | 0.039197 |
| PM20D2    | 486.8651 | 0.451775 | 0.165039 | 2.737384 | 0.006193 | 0.039197 |
| THAP9     | 201.7719 | 0.536672 | 0.196068 | 2.737173 | 0.006197 | 0.039206 |
| R3HDM4    | 444.9041 | -0.59398 | 0.217035 | -2.7368  | 0.006204 | 0.039224 |
| TMEM183A  | 1174.874 | 0.306653 | 0.112051 | 2.736741 | 0.006205 | 0.039224 |
| HLTF      | 7702.671 | 0.341283 | 0.12471  | 2.736617 | 0.006207 | 0.039224 |
| FBXW4     | 233.7258 | -0.60755 | 0.222044 | -2.73619 | 0.006216 | 0.039251 |
| SMC2      | 2517.916 | 0.422901 | 0.154562 | 2.736124 | 0.006217 | 0.039251 |



|            |          |          |          |          |          |          |
|------------|----------|----------|----------|----------|----------|----------|
| PCIF1      | 533.7355 | -0.59629 | 0.218003 | -2.73525 | 0.006233 | 0.03934  |
| LINC00482  | 15.82965 | -1.43649 | 0.525349 | -2.73435 | 0.00625  | 0.039431 |
| ZFPL1      | 323.948  | -0.75096 | 0.274696 | -2.7338  | 0.006261 | 0.039481 |
| LONP1      | 1274.791 | -0.58958 | 0.215724 | -2.73304 | 0.006275 | 0.039544 |
| ZNF446     | 112.6696 | -0.84083 | 0.307668 | -2.73293 | 0.006277 | 0.039544 |
| ACTN1      | 4540.458 | -0.42568 | 0.155763 | -2.73286 | 0.006279 | 0.039544 |
| CDKN2AIP   | 449.3265 | 0.407451 | 0.149128 | 2.73223  | 0.006291 | 0.039596 |
| EFNA5      | 101.071  | 0.667306 | 0.244241 | 2.732167 | 0.006292 | 0.039596 |
| S1PR2      | 192.002  | -0.56786 | 0.207858 | -2.73197 | 0.006296 | 0.039603 |
| EPOR       | 159.4972 | -0.647   | 0.236864 | -2.73153 | 0.006304 | 0.03964  |
| MPP3       | 269.0056 | -0.50846 | 0.186176 | -2.73108 | 0.006313 | 0.039677 |
| MRPL50     | 426.321  | 0.423633 | 0.155123 | 2.730955 | 0.006315 | 0.039677 |
| LZTS2      | 577.517  | -0.72729 | 0.266388 | -2.73021 | 0.006329 | 0.039751 |
| GMFB       | 1706.714 | 0.378927 | 0.13881  | 2.729825 | 0.006337 | 0.039778 |
| SIPA1L3    | 443.3931 | -0.46579 | 0.170637 | -2.72968 | 0.00634  | 0.039778 |
| KCNK1      | 249.8877 | -0.52221 | 0.191316 | -2.72958 | 0.006342 | 0.039778 |
| SELENOT    | 2024.578 | 0.33469  | 0.122692 | 2.727877 | 0.006374 | 0.039968 |
| TNFSF13    | 19.21771 | -1.28734 | 0.471955 | -2.72768 | 0.006378 | 0.039969 |
| PCMTD2     | 1429.209 | 0.307799 | 0.112846 | 2.727596 | 0.00638  | 0.039969 |
| PUS7       | 1187.981 | 0.392005 | 0.143732 | 2.727327 | 0.006385 | 0.039973 |
| MAN2B1     | 992.5405 | -0.61361 | 0.22499  | -2.7273  | 0.006386 | 0.039973 |
| ITGA4      | 851.0354 | 0.424727 | 0.155761 | 2.726787 | 0.006395 | 0.040019 |
| MEAF6      | 826.8251 | 0.321536 | 0.117955 | 2.725913 | 0.006412 | 0.040109 |
| EED        | 716.2981 | 0.378968 | 0.139043 | 2.725537 | 0.00642  | 0.040137 |
| HYOU1      | 6640.322 | -0.38747 | 0.142168 | -2.72541 | 0.006422 | 0.040137 |
| LMO7       | 3426.463 | 0.337977 | 0.124029 | 2.724987 | 0.00643  | 0.040157 |
| SELENOM    | 241.8992 | -0.75899 | 0.278531 | -2.72498 | 0.006431 | 0.040157 |
| NAPA-AS1   | 40.46442 | -0.92147 | 0.33823  | -2.72438 | 0.006442 | 0.040214 |
| PSG1       | 107.2149 | -0.65751 | 0.241401 | -2.72371 | 0.006455 | 0.040279 |
| MCM3AP-AS1 | 145.4778 | 0.521173 | 0.191535 | 2.721034 | 0.006508 | 0.040562 |
| YES1       | 2914.024 | 0.34868  | 0.128148 | 2.720922 | 0.00651  | 0.040562 |
| PMPCB      | 1658.816 | 0.348493 | 0.128082 | 2.720866 | 0.006511 | 0.040562 |
| SMOX       | 511.4901 | -0.59671 | 0.21939  | -2.71986 | 0.006531 | 0.040669 |
| OSBPL7     | 306.1987 | -0.56728 | 0.208593 | -2.71955 | 0.006537 | 0.040688 |
| EBP        | 1054.69  | -0.42519 | 0.156354 | -2.71944 | 0.006539 | 0.040688 |
| DDX18      | 2856.2   | 0.354279 | 0.13034  | 2.718113 | 0.006566 | 0.040835 |
| NREP       | 1133.837 | -0.3082  | 0.113425 | -2.71724 | 0.006583 | 0.040927 |
| ZBTB4      | 2480.955 | -0.35509 | 0.130756 | -2.71568 | 0.006614 | 0.041103 |
| DERA       | 900.5602 | 0.355854 | 0.131066 | 2.715079 | 0.006626 | 0.041155 |
| CSAD       | 339.1064 | -0.44093 | 0.162406 | -2.71499 | 0.006628 | 0.041155 |
| rab9b      | 143.9169 | 0.562909 | 0.20747  | 2.713209 | 0.006664 | 0.041358 |
| MGAT5B     | 203.9366 | -0.61104 | 0.225219 | -2.7131  | 0.006666 | 0.041358 |
| LBHD1      | 661.4002 | 0.356188 | 0.131312 | 2.712529 | 0.006677 | 0.041413 |
| HDAC6      | 1219.063 | -0.52262 | 0.192729 | -2.71169 | 0.006694 | 0.041484 |
| PLCD3      | 465.5472 | -0.57673 | 0.212685 | -2.71165 | 0.006695 | 0.041484 |
| LOC646644  | 83.49971 | 0.681097 | 0.251183 | 2.711556 | 0.006697 | 0.041484 |
| ANAPC4     | 640.0625 | 0.394039 | 0.145352 | 2.710933 | 0.006709 | 0.041546 |
| PSMD7      | 1184.206 | 0.328065 | 0.121037 | 2.710457 | 0.006719 | 0.041589 |
| SLC27A1    | 273.6022 | -0.69404 | 0.256085 | -2.71021 | 0.006724 | 0.041602 |
| UBXN2A     | 497.9749 | 0.395279 | 0.145855 | 2.710084 | 0.006727 | 0.041602 |

|              |          |          |          |          |          |          |
|--------------|----------|----------|----------|----------|----------|----------|
| SLC25A40     | 1383.144 | 0.382804 | 0.141297 | 2.70922  | 0.006744 | 0.041694 |
| PLPPR2       | 298.0414 | -0.56535 | 0.208699 | -2.70893 | 0.00675  | 0.041714 |
| LOC100507071 | 99.25482 | -0.8197  | 0.302676 | -2.70817 | 0.006766 | 0.041793 |
| NUP37        | 825.4159 | 0.364789 | 0.134729 | 2.70757  | 0.006778 | 0.041851 |
| ATP1A1       | 7568.474 | -0.26971 | 0.099629 | -2.70718 | 0.006786 | 0.041884 |
| CKS1B        | 1736.587 | 0.304661 | 0.11255  | 2.706898 | 0.006792 | 0.041903 |
| OSBPL2       | 1557.623 | -0.37517 | 0.13863  | -2.70625 | 0.006805 | 0.041952 |
| POLR3K       | 170.391  | 0.504051 | 0.186273 | 2.705972 | 0.00681  | 0.041962 |
| COL6A2       | 3514.048 | -1.15452 | 0.426799 | -2.70506 | 0.006829 | 0.04205  |
| NPY4R        | 99.86526 | -0.7642  | 0.282521 | -2.70493 | 0.006832 | 0.04205  |
| CDC40        | 985.9923 | 0.368422 | 0.136248 | 2.70406  | 0.00685  | 0.042144 |
| ASF1B        | 764.7088 | 0.430307 | 0.159145 | 2.703866 | 0.006854 | 0.042152 |
| CDC42EP2     | 130.6557 | -0.59182 | 0.218977 | -2.70267 | 0.006879 | 0.042275 |
| slc9a3r2     | 254.5627 | -0.68118 | 0.252041 | -2.70264 | 0.006879 | 0.042275 |
| ACOT8        | 370.2141 | -0.52517 | 0.194432 | -2.70107 | 0.006912 | 0.042458 |
| CAPN5        | 198.3373 | -0.52904 | 0.19596  | -2.69976 | 0.006939 | 0.042608 |
| ASPM         | 10552.33 | 0.461272 | 0.170875 | 2.699468 | 0.006945 | 0.042629 |
| RFNG         | 246.7655 | -0.81258 | 0.301276 | -2.69711 | 0.006994 | 0.042881 |
| ZNF747       | 158.2899 | -0.51863 | 0.192304 | -2.6969  | 0.006999 | 0.042881 |
| STAP2        | 266.6027 | -0.46196 | 0.171293 | -2.69689 | 0.006999 | 0.042881 |
| SIK1         | 176.8759 | -0.49721 | 0.18437  | -2.6968  | 0.007001 | 0.042881 |
| BTBD10       | 830.425  | 0.365585 | 0.135571 | 2.696634 | 0.007004 | 0.042881 |
| PLCD1        | 292.6472 | -0.55883 | 0.207237 | -2.69658 | 0.007006 | 0.042881 |
| SUMF2        | 1953.916 | -0.34115 | 0.126557 | -2.69563 | 0.007026 | 0.042987 |
| PMM2         | 1081.463 | -0.34864 | 0.129347 | -2.69539 | 0.007031 | 0.042992 |
| DNM1P35      | 44.57559 | -0.8443  | 0.313255 | -2.69524 | 0.007034 | 0.042992 |
| MBLAC2       | 392.5919 | 0.416487 | 0.154536 | 2.695077 | 0.007037 | 0.042992 |
| ZNF90        | 206.0396 | 0.689086 | 0.255685 | 2.695055 | 0.007038 | 0.042992 |
| VPS51        | 542.0526 | -0.65183 | 0.241894 | -2.69467 | 0.007046 | 0.043024 |
| HOXD9        | 73.83125 | -0.67719 | 0.251424 | -2.69344 | 0.007072 | 0.043164 |
| ZNF264       | 1402.51  | -0.34704 | 0.128852 | -2.69333 | 0.007074 | 0.043164 |
| TPRG1L       | 420.5022 | -0.4268  | 0.158486 | -2.69297 | 0.007082 | 0.043194 |
| EIF2S2       | 5390.987 | 0.328477 | 0.121983 | 2.692813 | 0.007085 | 0.043197 |
| MCCC2        | 1675.768 | 0.343905 | 0.127746 | 2.692105 | 0.0071   | 0.04327  |
| RPL36        | 2461.203 | -0.64694 | 0.24032  | -2.69198 | 0.007103 | 0.04327  |
| COL4A2       | 6714.437 | -0.54096 | 0.20098  | -2.6916  | 0.007111 | 0.043302 |
| EGFR-AS1     | 66.78555 | -0.85666 | 0.318322 | -2.69118 | 0.00712  | 0.04334  |
| FGGY         | 333.5548 | -0.39798 | 0.1479   | -2.69086 | 0.007127 | 0.043364 |
| AHNAK        | 102699   | -0.36707 | 0.136445 | -2.69027 | 0.007139 | 0.043424 |
| TTLL3        | 305.4659 | -0.4887  | 0.181679 | -2.68991 | 0.007147 | 0.043454 |
| TRPM7        | 3661.231 | 0.37688  | 0.140128 | 2.689549 | 0.007155 | 0.043484 |
| CNTLN        | 723.102  | 0.486697 | 0.180994 | 2.689019 | 0.007166 | 0.043536 |
| PYCR1        | 2167.429 | -0.62497 | 0.232549 | -2.6875  | 0.007199 | 0.043717 |
| C2orf69      | 793.6813 | 0.408029 | 0.151838 | 2.687264 | 0.007204 | 0.043731 |
| B3GNT2       | 797.7341 | 0.363273 | 0.135213 | 2.686663 | 0.007217 | 0.043793 |
| FCGRT        | 659.0044 | -0.61791 | 0.230013 | -2.68642 | 0.007222 | 0.043807 |
| BSDC1        | 1883.879 | -0.43317 | 0.161283 | -2.68581 | 0.007235 | 0.04387  |
| KATNA1       | 382.1901 | 0.40446  | 0.150619 | 2.685328 | 0.007246 | 0.043916 |
| CELSR1       | 2085.158 | -0.41966 | 0.156336 | -2.68439 | 0.007266 | 0.044023 |
| FRAT1        | 45.92993 | 0.911378 | 0.339534 | 2.684198 | 0.00727  | 0.04403  |

|           |          |          |          |          |          |          |
|-----------|----------|----------|----------|----------|----------|----------|
| SLC45A1   | 26.35742 | -1.07161 | 0.39938  | -2.68318 | 0.007293 | 0.044147 |
| MGRN1     | 432.9328 | -0.54179 | 0.201963 | -2.6826  | 0.007305 | 0.044191 |
| WNK4      | 42.72183 | -0.86287 | 0.321673 | -2.68245 | 0.007308 | 0.044191 |
| LZTR1     | 794.8    | -0.51975 | 0.193765 | -2.68235 | 0.007311 | 0.044191 |
| CHN1      | 325.0982 | 0.418732 | 0.156108 | 2.682324 | 0.007311 | 0.044191 |
| SMARCE1   | 3937.441 | 0.274575 | 0.102421 | 2.680854 | 0.007343 | 0.044368 |
| CLIP2     | 937.7974 | -0.63098 | 0.235398 | -2.68048 | 0.007352 | 0.0444   |
| COIL      | 623.3066 | 0.346694 | 0.129379 | 2.679682 | 0.007369 | 0.044469 |
| VPS36     | 1967.209 | 0.330768 | 0.123439 | 2.679606 | 0.007371 | 0.044469 |
| NAT9      | 762.5072 | -0.52047 | 0.194236 | -2.67957 | 0.007372 | 0.044469 |
| EOGT      | 440.157  | 0.42977  | 0.160543 | 2.676979 | 0.007429 | 0.044797 |
| CACNB3    | 371.6029 | -0.49424 | 0.184691 | -2.67605 | 0.00745  | 0.044904 |
| REPS1     | 705.5516 | 0.335854 | 0.125517 | 2.675757 | 0.007456 | 0.044908 |
| ZNF678    | 555.4275 | 0.474416 | 0.177327 | 2.67537  | 0.007465 | 0.044934 |
| C2orf72   | 212.8628 | -0.47867 | 0.178927 | -2.67524 | 0.007468 | 0.044934 |
| PIGW      | 417.5852 | 0.452402 | 0.169112 | 2.675157 | 0.007469 | 0.044934 |
| GPRASP2   | 371.3383 | 0.41394  | 0.154742 | 2.675038 | 0.007472 | 0.044934 |
| RBM45     | 508.0386 | 0.386999 | 0.144713 | 2.674252 | 0.00749  | 0.045022 |
| KDELR2    | 13446.7  | -0.38249 | 0.143046 | -2.67393 | 0.007497 | 0.045047 |
| ZNF829    | 207.7593 | 0.447972 | 0.16755  | 2.673668 | 0.007503 | 0.045066 |
| PIAS2     | 990.5504 | -0.37723 | 0.141124 | -2.67304 | 0.007517 | 0.045129 |
| ANP32E    | 2277.239 | 0.371556 | 0.13901  | 2.672872 | 0.007521 | 0.045129 |
| POLR1A    | 1215.931 | 0.360783 | 0.134983 | 2.672808 | 0.007522 | 0.045129 |
| RPL7      | 5376.133 | 0.302299 | 0.113125 | 2.672257 | 0.007534 | 0.045159 |
| dnase2    | 713.9502 | -0.51061 | 0.191082 | -2.67218 | 0.007536 | 0.045159 |
| B3GLCT    | 512.3824 | 0.442069 | 0.165437 | 2.672134 | 0.007537 | 0.045159 |
| ZC4H2     | 279.7844 | 0.453599 | 0.169756 | 2.672062 | 0.007539 | 0.045159 |
| RP9       | 345.0332 | 0.402263 | 0.15056  | 2.67177  | 0.007545 | 0.045181 |
| PRC1-AS1  | 55.60527 | 0.755554 | 0.282826 | 2.671445 | 0.007553 | 0.045192 |
| LINC00896 | 32.08853 | -1.10062 | 0.411999 | -2.67142 | 0.007553 | 0.045192 |
| TBL2      | 1179.442 | -0.38858 | 0.145518 | -2.67032 | 0.007578 | 0.045306 |
| TIMM8B    | 488.2993 | 0.43415  | 0.162594 | 2.670154 | 0.007582 | 0.045306 |
| TFE3      | 1170.662 | -0.40332 | 0.151053 | -2.67005 | 0.007584 | 0.045306 |
| TMEM106A  | 272.1759 | -0.46906 | 0.175675 | -2.67002 | 0.007585 | 0.045306 |
| BRI3BP    | 135.8881 | 0.54815  | 0.205315 | 2.669798 | 0.00759  | 0.045306 |
| HDHD2     | 664.691  | 0.357824 | 0.134056 | 2.669208 | 0.007603 | 0.045368 |
| SGSM3     | 942.1345 | -0.63025 | 0.23617  | -2.66864 | 0.007616 | 0.045427 |
| CARD19    | 301.5819 | -0.71906 | 0.269494 | -2.6682  | 0.007626 | 0.045454 |
| C9orf129  | 99.50185 | -0.87863 | 0.329298 | -2.66819 | 0.007626 | 0.045454 |
| AGPAT1    | 995.0696 | -0.46921 | 0.175869 | -2.66794 | 0.007632 | 0.045469 |
| MRPS36    | 564.8789 | 0.387362 | 0.145205 | 2.667692 | 0.007637 | 0.045486 |
| PDXDC1    | 5732.43  | -0.401   | 0.150341 | -2.66726 | 0.007647 | 0.045511 |
| EME2      | 32.65339 | -1.09341 | 0.409941 | -2.66724 | 0.007648 | 0.045511 |
| PDXDC2P   | 1296.102 | -0.4129  | 0.154824 | -2.66692 | 0.007655 | 0.045537 |
| ZFYVE28   | 58.64614 | -0.79068 | 0.296501 | -2.6667  | 0.00766  | 0.04555  |
| CPQ       | 483.6606 | -0.39698 | 0.1489   | -2.66611 | 0.007673 | 0.045597 |
| STK32B    | 700.3926 | 0.335126 | 0.125702 | 2.666038 | 0.007675 | 0.045597 |
| SYNM      | 487.1781 | 0.362486 | 0.135973 | 2.665875 | 0.007679 | 0.045597 |
| ZDHHC23   | 203.0162 | 0.467083 | 0.175218 | 2.665726 | 0.007682 | 0.045597 |
| LINC01011 | 84.47928 | -0.6907  | 0.259107 | -2.66571 | 0.007683 | 0.045597 |

|           |          |          |          |          |          |          |
|-----------|----------|----------|----------|----------|----------|----------|
| PAPSS2    | 2746.868 | -0.30238 | 0.113476 | -2.66472 | 0.007705 | 0.045713 |
| ORC3      | 964.9702 | 0.370333 | 0.139008 | 2.664109 | 0.007719 | 0.045762 |
| SLC9A3    | 114.451  | -0.81949 | 0.307605 | -2.6641  | 0.007719 | 0.045762 |
| CRTC1     | 175.7836 | -0.57836 | 0.21714  | -2.66352 | 0.007733 | 0.045824 |
| C19orf24  | 84.20164 | -0.83251 | 0.312629 | -2.66293 | 0.007746 | 0.045887 |
| NUP50-AS1 | 129.8962 | 0.546804 | 0.205362 | 2.662633 | 0.007753 | 0.04591  |
| UBE2F     | 577.7182 | 0.35425  | 0.133074 | 2.662059 | 0.007766 | 0.04596  |
| WTAP      | 1259.539 | 0.338939 | 0.127328 | 2.661935 | 0.007769 | 0.04596  |
| SMARCA5   | 3571.188 | 0.365138 | 0.137173 | 2.661874 | 0.007771 | 0.04596  |
| LMBR1L    | 409.7273 | -0.45052 | 0.169284 | -2.66133 | 0.007783 | 0.046017 |
| LINC01605 | 43.8375  | -0.85095 | 0.319766 | -2.66116 | 0.007787 | 0.046022 |
| PPM1E     | 92.64147 | 0.782423 | 0.294041 | 2.660934 | 0.007792 | 0.046027 |
| RIDA      | 500.892  | 0.364135 | 0.136848 | 2.660868 | 0.007794 | 0.046027 |
| ACTL10    | 73.18484 | -0.66938 | 0.251703 | -2.65941 | 0.007828 | 0.046209 |
| VIPR2     | 45.34636 | -0.99368 | 0.37369  | -2.65912 | 0.007835 | 0.046232 |
| TPP2      | 4301.865 | 0.349567 | 0.131474 | 2.658836 | 0.007841 | 0.046253 |
| TSC22D1   | 3604.874 | 0.371804 | 0.13987  | 2.658216 | 0.007856 | 0.04632  |
| DMWD      | 324.1658 | -0.50763 | 0.190995 | -2.65784 | 0.007864 | 0.046354 |
| FN3K      | 27.83762 | -1.09495 | 0.412005 | -2.65762 | 0.00787  | 0.046367 |
| tap2      | 1013.534 | 0.366138 | 0.137802 | 2.656982 | 0.007884 | 0.046426 |
| PCDHB19P  | 22.58895 | -1.27173 | 0.478644 | -2.65693 | 0.007886 | 0.046426 |
| SHISA4    | 340.6883 | -0.61877 | 0.232907 | -2.65673 | 0.00789  | 0.046436 |
| TDP2      | 2877.338 | 0.463439 | 0.174462 | 2.656385 | 0.007898 | 0.046466 |
| LOC728613 | 40.36913 | -0.84478 | 0.318067 | -2.65598 | 0.007908 | 0.046504 |
| C9orf40   | 251.4866 | 0.478726 | 0.180257 | 2.655797 | 0.007912 | 0.046512 |
| UFD1L     | 877.3817 | 0.423618 | 0.159516 | 2.655655 | 0.007915 | 0.046513 |
| LINC00672 | 60.13062 | 0.808529 | 0.3045   | 2.655269 | 0.007925 | 0.046549 |
| HARS2     | 1827.763 | 0.294094 | 0.110819 | 2.653814 | 0.007959 | 0.046732 |
| MEMO1     | 432.6844 | 0.399225 | 0.150447 | 2.653589 | 0.007964 | 0.046734 |
| UNC45A    | 1295.822 | -0.58302 | 0.219715 | -2.65354 | 0.007965 | 0.046734 |
| SLC38A10  | 654.088  | -0.58752 | 0.221426 | -2.65335 | 0.00797  | 0.046741 |
| POLR3F    | 555.2328 | 0.379307 | 0.142965 | 2.653154 | 0.007974 | 0.046741 |
| DHX57     | 991.2286 | 0.355756 | 0.134118 | 2.652564 | 0.007988 | 0.046799 |
| CCT7      | 6497.779 | 0.286432 | 0.107991 | 2.652377 | 0.007993 | 0.046807 |
| MORF4     | 30.26671 | 1.025943 | 0.386861 | 2.651967 | 0.008002 | 0.046846 |
| ACSL4     | 6597.908 | 0.309433 | 0.116706 | 2.651397 | 0.008016 | 0.046908 |
| NUMBL     | 352.9976 | -0.58372 | 0.220236 | -2.65042 | 0.008039 | 0.047026 |
| FAM46C    | 230.3388 | -0.5553  | 0.20954  | -2.65011 | 0.008046 | 0.047051 |
| RPL8      | 9642.481 | -0.55025 | 0.207664 | -2.64973 | 0.008056 | 0.047087 |
| RAB11FIP1 | 176.0193 | -0.51712 | 0.195196 | -2.64923 | 0.008068 | 0.047138 |
| RPS6KA5   | 165.2251 | 0.569485 | 0.215052 | 2.648123 | 0.008094 | 0.047257 |
| ABCD1     | 171.9881 | -0.77262 | 0.291828 | -2.64751 | 0.008109 | 0.047325 |
| TADA3     | 933.4211 | -0.47299 | 0.178667 | -2.64734 | 0.008113 | 0.04733  |
| ENDOD1    | 448.9064 | 0.411215 | 0.15539  | 2.646348 | 0.008137 | 0.047452 |
| DUSP6     | 109.2401 | 0.571072 | 0.215899 | 2.64509  | 0.008167 | 0.047611 |
| LYSMD3    | 1477.309 | -0.43612 | 0.164896 | -2.64483 | 0.008173 | 0.047629 |
| IGBP1     | 1273.045 | -0.33346 | 0.126121 | -2.64395 | 0.008194 | 0.047721 |
| PGBD1     | 400.9516 | 0.385252 | 0.145713 | 2.643921 | 0.008195 | 0.047721 |
| RANBP2    | 7744.804 | 0.376915 | 0.142599 | 2.643184 | 0.008213 | 0.047807 |
| BOLA3     | 268.8019 | 0.485575 | 0.183728 | 2.642908 | 0.00822  | 0.047828 |

|            |          |          |          |          |          |          |
|------------|----------|----------|----------|----------|----------|----------|
| SNX29      | 594.1011 | -0.36757 | 0.139095 | -2.64261 | 0.008227 | 0.047852 |
| PRPH       | 89.19275 | 0.612314 | 0.231902 | 2.640395 | 0.008281 | 0.048132 |
| SLC9A6     | 1087.482 | 0.318984 | 0.12081  | 2.640381 | 0.008281 | 0.048132 |
| LINC00167  | 26.12816 | 1.024478 | 0.388029 | 2.640207 | 0.008286 | 0.048132 |
| ACER3      | 875.6053 | 0.429604 | 0.162721 | 2.640124 | 0.008288 | 0.048132 |
| HJURP      | 4796.988 | 0.268167 | 0.101584 | 2.639843 | 0.008294 | 0.048154 |
| TOM1L2     | 742.1135 | -0.45617 | 0.172862 | -2.63892 | 0.008317 | 0.048267 |
| MLEC       | 8028.479 | -0.29159 | 0.110511 | -2.63855 | 0.008326 | 0.048295 |
| ENG        | 631.3725 | -0.53713 | 0.203575 | -2.63847 | 0.008328 | 0.048295 |
| HMG20B     | 929.7916 | -0.55605 | 0.210806 | -2.63775 | 0.008346 | 0.048379 |
| PCED1B     | 89.27285 | -0.61816 | 0.234394 | -2.63727 | 0.008358 | 0.048429 |
| YIPF3      | 1631.532 | -0.54552 | 0.206895 | -2.63671 | 0.008371 | 0.048491 |
| OSBPL10    | 359.2494 | -0.39174 | 0.148629 | -2.63571 | 0.008396 | 0.048616 |
| PLEKHA2    | 3129.054 | -0.35212 | 0.133617 | -2.63532 | 0.008406 | 0.048653 |
| ULK1       | 393.0758 | -0.53823 | 0.204337 | -2.63402 | 0.008438 | 0.048804 |
| FDX1       | 531.7038 | 0.475387 | 0.18054  | 2.63314  | 0.00846  | 0.048912 |
| PRRC2B     | 4543.783 | -0.39054 | 0.148366 | -2.63225 | 0.008482 | 0.049022 |
| METRNL     | 186.4956 | -0.681   | 0.258896 | -2.63038 | 0.008529 | 0.049274 |
| TIMM17A    | 2190.307 | 0.298441 | 0.113474 | 2.630049 | 0.008537 | 0.049304 |
| OSGEPL1    | 321.4263 | 0.426627 | 0.16226  | 2.629277 | 0.008557 | 0.04939  |
| Mirlet7bhg | 579.4909 | -0.591   | 0.224784 | -2.6292  | 0.008559 | 0.04939  |
| DNASE1     | 252.6212 | -0.48199 | 0.183401 | -2.62804 | 0.008588 | 0.04954  |
| RPAP1      | 573.4553 | -0.44448 | 0.16922  | -2.62663 | 0.008623 | 0.049721 |
| E2F8       | 306.6427 | 0.479774 | 0.182664 | 2.626546 | 0.008626 | 0.049721 |
| RPLP1      | 2373.318 | -0.58359 | 0.222243 | -2.62593 | 0.008641 | 0.04978  |
| MTF2       | 1658.928 | 0.415166 | 0.158104 | 2.625894 | 0.008642 | 0.04978  |
| SGO1       | 487.4111 | 0.428767 | 0.163311 | 2.625458 | 0.008653 | 0.049815 |
| RNF8       | 751.1501 | 0.359281 | 0.136848 | 2.625398 | 0.008655 | 0.049815 |
| CREB3L2    | 2836.261 | -0.41818 | 0.159354 | -2.62421 | 0.008685 | 0.049971 |
| SPATA5     | 1469.469 | 0.419258 | 0.159781 | 2.623956 | 0.008692 | 0.049989 |
| STON2      | 135.2855 | 0.665949 | 0.253811 | 2.623804 | 0.008695 | 0.049993 |
