# Supplementary material for: RNA Sequencing in Hypoxia-Adapted T98G Glioblastoma Cells Provides Supportive Evidence for IRE1 as a Potential Therapeutic Target
Source: MDPI journal article supplement (doi:10.3390/genes14040841), 2023-03-31
Supplement: s1 [file s1]

Table S11. DrugBank analysis searched a subset of the hypoxia upregulated DEGs (601 with  $p < 0.01$ ) with its target database and identified four molecules targeting genes upregulated in hypoxic T98G cells.

| Drug                                                                                             | Target   | Gene Lists                                                                                                            |
|--------------------------------------------------------------------------------------------------|----------|-----------------------------------------------------------------------------------------------------------------------|
| Tenecteplase-<br>FDA-approved for<br>myocardial<br>infarction                                    | 5 genes  | CALR,CLEC3B,LRP1,PLAUR,SERPINE1                                                                                       |
| succinic acid-<br>“general purpose<br>food additive” not<br>subject to<br>regulatory<br>approval | 7 genes  | P3H1,P3H3,P4HA1,P4HA2,PLOD1,PLOD3,SDHA                                                                                |
| artemimol- active<br>metabolite of<br>artesunate, which<br>is FDA-approved<br>for malaria        | 13 genes | LDOA,ENO1,GAPDH,GPI,LDHA,LGALS1,MYH9,P4HB,PGAM1,PGK1,PKM,TPI1,VIM                                                     |
| copper- trace<br>mineral not<br>subject to<br>regulatory<br>approval                             | 22 genes | ANG,APLP1,CALR,CLEC3B,CP,ENO1,GAPDH,GPI,GSN,HSP90B1,HSPA5,LDHA,LOX,MT1E<br>MT1X,MT2A,P4HB,PAM,PGAM1,PGK1,PKM,SERPINE1 |
