# Supplementary material for: RNA Sequencing in Hypoxia-Adapted T98G Glioblastoma Cells Provides Supportive Evidence for IRE1 as a Potential Therapeutic Target
Source: MDPI journal article supplement (doi:10.3390/genes14040841), 2023-03-31
Supplement: s1 [file s1]

Supplementary Table S10. T98G GBM Panther Gene Ontology Reactome Analysis of DEGS Upregulated in Normoxia Sorted by P-value.

|                                                     |                                      |                                                     |                 |   |                     |          |                       |  |                            |  |                    |
|-----------------------------------------------------|--------------------------------------|-----------------------------------------------------|-----------------|---|---------------------|----------|-----------------------|--|----------------------------|--|--------------------|
| Analysis Type:                                      |                                      | PANTHER Overrepresentation Test (Released 20221013) |                 |   |                     |          |                       |  |                            |  |                    |
| Annotation Version and Release Date:                |                                      | Reactome version 77 Released 2021-10-01             |                 |   |                     |          |                       |  |                            |  |                    |
| Analyzed List:                                      | upload_1 (Homo sapiens)              |                                                     |                 |   |                     |          |                       |  |                            |  |                    |
| Reference List:                                     | Homo sapiens (all genes in database) |                                                     |                 |   |                     |          |                       |  |                            |  |                    |
| Test Type: FISHER                                   |                                      |                                                     |                 |   |                     |          |                       |  |                            |  |                    |
| Correction:                                         | BONFERRONI                           |                                                     |                 |   |                     |          |                       |  |                            |  |                    |
| Bonferroni count:                                   | 2229                                 |                                                     |                 |   |                     |          |                       |  |                            |  |                    |
| Reactome pathways                                   | Homo sapiens -                       | REFLIST (20589)                                     | upload_1 (1340) |   | upload_1 (expected) |          | upload_1 (over/under) |  | upload_1 (fold Enrichment) |  | upload_1 (P-value) |
| Unclassified (UNCLASSIFIED)                         |                                      | 10082                                               | 454             |   | 656.17              |          | -                     |  | .69                        |  | 0.00E00            |
| Cell Cycle (R-HSA-1640170)                          |                                      | 648                                                 | 171             |   | 42.17               |          | +                     |  | 4.05                       |  | 1.69E-44           |
| Cell Cycle, Mitotic (R-HSA-69278)                   |                                      | 517                                                 | 136             |   | 33.65               |          | +                     |  | 4.04                       |  | 1.72E-34           |
| Metabolism of RNA (R-HSA-8953854)                   |                                      | 661                                                 | 143             |   | 43.02               |          | +                     |  | 3.32                       |  | 1.70E-28           |
| Cell Cycle Checkpoints (R-HSA-69620)                |                                      | 271                                                 | 90              |   | 17.64               |          | +                     |  | 5.10                       |  | 4.82E-28           |
| Gene expression (Transcription) (R-HSA-74160)       |                                      | 1454                                                | 197             |   | 94.63               |          | +                     |  | 2.08                       |  | 5.46E-17           |
| Mitotic G1 phase and G1/S transition (R-HSA-453279) | 147                                  | 53                                                  | 9.57            | + | 5.54                | 6.47E-17 |                       |  |                            |  |                    |
| G1/S Transition (R-HSA-69206)                       | 130                                  | 50                                                  | 8.46            | + | 5.91                | 8.28E-17 |                       |  |                            |  |                    |
| Mitotic Metaphase and Anaphase (R-HSA-2555396)      | 228                                  | 65                                                  | 14.84           | + | 4.38                | 1.04E-16 |                       |  |                            |  |                    |
| M Phase (R-HSA-68886)                               | 375                                  | 84                                                  | 24.41           | + | 3.44                | 1.80E-16 |                       |  |                            |  |                    |
| DNA Replication (R-HSA-69306)                       | 159                                  | 54                                                  | 10.35           | + | 5.22                | 2.59E-16 |                       |  |                            |  |                    |
| Mitotic Anaphase (R-HSA-68882)                      | 227                                  | 64                                                  | 14.77           | + | 4.33                | 3.24E-16 |                       |  |                            |  |                    |
| S Phase (R-HSA-69242)                               | 161                                  | 54                                                  | 10.48           | + | 5.15                | 4.11E-16 |                       |  |                            |  |                    |
| Synthesis of DNA (R-HSA-69239)                      | 119                                  | 46                                                  | 7.74            | + | 5.94                | 2.26E-15 |                       |  |                            |  |                    |
| Process Capped Intron-Cont Pre-mRNA (R-HSA-72203)   | 238                                  | 64                                                  | 15.49           | + | 4.13                | 2.43E-15 |                       |  |                            |  |                    |
| G2/M Checkpoints (R-HSA-69481)                      | 150                                  | 49                                                  | 9.76            | + | 5.02                | 4.72E-14 |                       |  |                            |  |                    |
| DNA Repair (R-HSA-73894)                            | 310                                  | 70                                                  | 20.18           | + | 3.47                | 1.61E-13 |                       |  |                            |  |                    |
| Separation of Sister Chromatids (R-HSA-2467813)     | 187                                  | 51                                                  | 12.17           | + | 4.19                | 5.09E-12 |                       |  |                            |  |                    |
| Mitotic Spindle Checkpoint (R-HSA-69618)            | 109                                  | 38                                                  | 7.09            | + | 5.36                | 3.44E-11 |                       |  |                            |  |                    |
| DNA Double-Strand Break Repair (R-HSA-5693532)      | 149                                  | 44                                                  | 9.70            | + | 4.54                | 4.10E-11 |                       |  |                            |  |                    |
| Amp sig kinetochore MAD2 inhib sig (R-HSA-141444)   | 92                                   | 35                                                  | 5.99            | + | 5.85                | 4.61E-11 |                       |  |                            |  |                    |

|                                                        |      |     |       |   |       |          |
|--------------------------------------------------------|------|-----|-------|---|-------|----------|
| Amplif of signal from the kinetochores (R-HSA-141424)  | 92   | 35  | 5.99  | + | 5.85  | 4.61E-11 |
| RNA Polymerase II Transcription (R-HSA-73857)          | 1319 | 164 | 85.84 | + | 1.91  | 1.38E-10 |
| Resolu of Sister Chromatid Cohesion (R-HSA-2500257)    | 123  | 39  | 8.01  | + | 4.87  | 1.93E-10 |
| Mitotic Prometaphase (R-HSA-68877)                     | 199  | 49  | 12.95 | + | 3.78  | 4.82E-10 |
| mRNA Splicing - Major Pathway (R-HSA-72163)            | 180  | 46  | 11.71 | + | 3.93  | 8.60E-10 |
| tRNA processing (R-HSA-72306)                          | 104  | 35  | 6.77  | + | 5.17  | 8.70E-10 |
| Chromosome Maintenance (R-HSA-73886)                   | 120  | 37  | 7.81  | + | 4.74  | 1.67E-09 |
| Homology Directed Repair (R-HSA-5693538)               | 120  | 37  | 7.81  | + | 4.74  | 1.67E-09 |
| DNA Replication Pre-Initiation (R-HSA-69002)           | 116  | 36  | 7.55  | + | 4.77  | 2.91E-09 |
| DNA strand elongation (R-HSA-69190)                    | 32   | 21  | 2.08  | + | 10.08 | 2.97E-09 |
| mRNA Splicing (R-HSA-72172)                            | 188  | 46  | 12.24 | + | 3.76  | 3.17E-09 |
| Activation of pre-replicative complex (R-HSA-68962)    | 33   | 21  | 2.15  | + | 9.78  | 4.58E-09 |
| EML4 and NUDC mitotic spindle form (R-HSA-9648025)     | 115  | 35  | 7.48  | + | 4.68  | 9.44E-09 |
| Activation of ATR in res to rep stress (R-HSA-176187)  | 37   | 21  | 2.41  | + | 8.72  | 2.32E-08 |
| Transcriptional Regulation by TP53 (R-HSA-3700989)     | 360  | 64  | 23.43 | + | 2.73  | 4.47E-08 |
| HDR Homologous Recomb/(SSA) (R-HSA-5693567)            | 114  | 33  | 7.42  | + | 4.45  | 1.17E-07 |
| HDR Homologous Recomb (HRR) (R-HSA-5685942)            | 66   | 25  | 4.30  | + | 5.82  | 2.58E-07 |
| snRNP Assembly (R-HSA-191859)                          | 50   | 22  | 3.25  | + | 6.76  | 3.47E-07 |
| Metabolism of non-coding RNA (R-HSA-194441)            | 50   | 22  | 3.25  | + | 6.76  | 3.47E-07 |
| RHO GTPases Activate Formins (R-HSA-5663220)           | 136  | 35  | 8.85  | + | 3.95  | 4.69E-07 |
| TCA cycle and respira electron trans (R-HSA-1428517)   | 176  | 40  | 11.45 | + | 3.49  | 6.05E-07 |
| Homologous DNA Pair/Strand Excha (R-HSA-5693579)       | 42   | 20  | 2.73  | + | 7.32  | 7.95E-07 |
| Switching origins to post-replicat state (R-HSA-69052) | 90   | 28  | 5.86  | + | 4.78  | 8.56E-07 |
| Generic Transcription Pathway (R-HSA-212436)           | 1197 | 139 | 77.90 | + | 1.78  | 9.58E-07 |
| Diseases of DNA repair (R-HSA-9675135)                 | 33   | 18  | 2.15  | + | 8.38  | 1.13E-06 |
| tRNA processing in the nucleus (R-HSA-6784531)         | 55   | 22  | 3.58  | + | 6.15  | 1.47E-06 |
| Presynaptic homolo DNA strd exch (R-HSA-5693616)       | 39   | 19  | 2.54  | + | 7.49  | 1.63E-06 |
| Trans of Mat Transcript to Cytoplasm (R-HSA-72202)     | 80   | 26  | 5.21  | + | 4.99  | 1.67E-06 |
| Orc1 removal from chromatin (R-HSA-68949)              | 70   | 23  | 4.56  | + | 5.05  | 1.33E-05 |

|                                                           |     |    |       |   |      |          |
|-----------------------------------------------------------|-----|----|-------|---|------|----------|
| Cellular responses to stress (R-HSA-2262752)              | 718 | 91 | 46.73 | + | 1.95 | 3.21E-05 |
| Def HDR PALB2 BRCA2/RAD51/RAD51C-(HSA-9704646) 24         |     | 14 | 1.56  | + | 8.96 | 5.09E-05 |
| Diseases of DNA Dble-Strd Break Rep (R-HSA-9675136) 24    |     | 14 | 1.56  | + | 8.96 | 5.09E-05 |
| Def HDR (HRR) due to PALB2 loss fxn (R-HSA-9701193) 24    |     | 14 | 1.56  | + | 8.96 | 5.09E-05 |
| Def HDR (HRR) due to BRCA1 loss fxn (R-HSA-9701192) 24    |     | 14 | 1.56  | + | 8.96 | 5.09E-05 |
| Def HDR (HRR) PALB2 loss BRCA1 bin (R-HSA-9704331) 24     |     | 14 | 1.56  | + | 8.96 | 5.09E-05 |
| Interact of Rev with host cellular prot (R-HSA-177243) 34 |     | 16 | 2.21  | + | 7.23 | 5.24E-05 |
| Extension of Telomeres (R-HSA-180786) 51                  |     | 19 | 3.32  | + | 5.72 | 5.39E-05 |
| Trans mRNAs Intronless Transcripts (R-HSA-159234) 40      |     | 17 | 2.60  | + | 6.53 | 6.29E-05 |
| Trans mRNA Intron-ContTranscript (R-HSA-159236) 71        |     | 22 | 4.62  | + | 4.76 | 6.80E-05 |
| Assembly of the pre-replicative cmplx (R-HSA-68867) 99    |     | 26 | 6.44  | + | 4.04 | 6.83E-05 |
| Cellular responses to stimuli (R-HSA-8953897) 732         |     | 91 | 47.64 | + | 1.91 | 9.44E-05 |
| Resolun of D-loop Strd Anneal (SDSA) (R-HSA-5693554) 26   |     | 14 | 1.69  | + | 8.27 | 1.09E-04 |
| Respiratory electron transport (R-HSA-611105) 102         |     | 26 | 6.64  | + | 3.92 | 1.14E-04 |
| Reg of HSF1-med heat shock resp (R-HSA-3371453) 68        |     | 21 | 4.43  | + | 4.75 | 1.46E-04 |
| Res Holliday Junction Intermediates (R-HSA-5693568) 32    |     | 15 | 2.08  | + | 7.20 | 1.50E-04 |
| Rev-mediated nucexport HIV RNA (R-HSA-165054) 32          |     | 15 | 2.08  | + | 7.20 | 1.50E-04 |
| Tran SLBP Dependant Mature mRNA (R-HSA-159230) 33         |     | 15 | 2.15  | + | 6.98 | 2.05E-04 |
| Resolution of D-Loop Structures (R-HSA-5693537) 33        |     | 15 | 2.15  | + | 6.98 | 2.05E-04 |
| G1/S-Specific Transcription (R-HSA-69205) 28              |     | 14 | 1.82  | + | 7.68 | 2.21E-04 |
| Trans mRNA intronless Transcript (R-HSA-159231) 39        |     | 16 | 2.54  | + | 6.30 | 2.37E-04 |
| SUMOylation (R-HSA-2990846) 163                           |     | 33 | 10.61 | + | 3.11 | 2.37E-04 |
| G2/M DNA damage checkpoint (R-HSA-69473) 78               |     | 22 | 5.08  | + | 4.33 | 2.73E-04 |
| NEP/NS2 Inter Cellular Export Machin (R-HSA-168333) 29    |     | 14 | 1.89  | + | 7.42 | 3.09E-04 |
| Mitochondrial protein import (R-HSA-1268020) 65           |     | 20 | 4.23  | + | 4.73 | 3.14E-04 |
| Host Interactions of HIV factors (R-HSA-162909) 124       |     | 28 | 8.07  | + | 3.47 | 3.15E-04 |
| Translation (R-HSA-72766) 293                             |     | 47 | 19.07 | + | 2.46 | 3.27E-04 |
| Regulation of mitotic cell cycle (R-HSA-453276) 87        |     | 23 | 5.66  | + | 4.06 | 3.81E-04 |
| APC/C-mediated degr of cell cycle prot (R-HSA-174143) 87  |     | 23 | 5.66  | + | 4.06 | 3.81E-04 |

|                                                      |      |     |        |   |       |          |
|------------------------------------------------------|------|-----|--------|---|-------|----------|
| Regulation of TP53 Activity (R-HSA-5633007)          | 159  | 32  | 10.35  | + | 3.09  | 4.13E-04 |
| Resp ATP syn uncoupling prot (R-HSA-163200)          | 126  | 28  | 8.20   | + | 3.41  | 4.19E-04 |
| Export Viral Ribonucleoprot Nucleus (R-HSA-168274)   | 30   | 14  | 1.95   | + | 7.17  | 4.28E-04 |
| Processing of DNA dble-strd break (R-HSA-5693607)    | 81   | 22  | 5.27   | + | 4.17  | 4.74E-04 |
| Unwinding of DNA (R-HSA-176974)                      | 12   | 10  | .78    | + | 12.80 | 5.14E-04 |
| Nuclear import of Rev protein (R-HSA-180746)         | 31   | 14  | 2.02   | + | 6.94  | 5.86E-04 |
| GPCR ligand binding (R-HSA-500792)                   | 463  | 6   | 30.13  | - | .20   | 5.95E-04 |
| HDR (SSA) (R-HSA-5685938)                            | 37   | 15  | 2.41   | + | 6.23  | 6.68E-04 |
| Transport SLBP indep Mature mRNA (R-HSA-159227)      | 32   | 14  | 2.08   | + | 6.72  | 7.96E-04 |
| SUMOylation of SUMOylation proteins (R-HSA-4085377)  | 32   | 14  | 2.08   | + | 6.72  | 7.96E-04 |
| HIV Infection (R-HSA-162906)                         | 227  | 39  | 14.77  | + | 2.64  | 8.71E-04 |
| Reg TP53 Activity through Phosphory(R-HSA-6804756)   | 92   | 23  | 5.99   | + | 3.84  | 8.86E-04 |
| E2F mediated reg of DNA replication (R-HSA-113510)   | 22   | 12  | 1.43   | + | 8.38  | 8.96E-04 |
| rRNA processing nucleus cytosol (R-HSA-8868773)      | 192  | 35  | 12.50  | + | 2.80  | 9.00E-04 |
| Metabolism (R-HSA-1430728)                           | 2087 | 197 | 135.83 | + | 1.45  | 9.92E-04 |
| SUMOylation DNA damage response(R-HSA-3108214)       | 71   | 20  | 4.62   | + | 4.33  | 1.03E-03 |
| Nuclear Pore Complex Disassembly (R-HSA-3301854)     | 33   | 14  | 2.15   | + | 6.52  | 1.07E-03 |
| CDT1 assoc with the CDC6:ORC:origin (R-HSA-68827)    | 58   | 18  | 3.77   | + | 4.77  | 1.18E-03 |
| Mitochondrial translation (R-HSA-5368287)            | 94   | 23  | 6.12   | + | 3.76  | 1.22E-03 |
| Metabolism of proteins (R-HSA-392499)                | 1914 | 183 | 124.57 | + | 1.47  | 1.25E-03 |
| Telomere C-strand (Lagging Strd) Syn (R-HSA-174417)  | 34   | 14  | 2.21   | + | 6.33  | 1.43E-03 |
| Mitochondrial translation elongation (R-HSA-5389840) | 88   | 22  | 5.73   | + | 3.84  | 1.57E-03 |
| Cellular response to heat stress (R-HSA-3371556)     | 88   | 22  | 5.73   | + | 3.84  | 1.57E-03 |
| Mitochondrial translation initiation (R-HSA-5368286) | 88   | 22  | 5.73   | + | 3.84  | 1.57E-03 |
| rRNA processing (R-HSA-72312)                        | 202  | 36  | 13.15  | + | 2.74  | 1.62E-03 |
| Trans Ribonucleoproteins Nucleus (R-HSA-168271)      | 29   | 13  | 1.89   | + | 6.89  | 1.68E-03 |
| rRNA modification nucleus/cytosol (R-HSA-6790901)    | 60   | 18  | 3.90   | + | 4.61  | 1.78E-03 |
| Nuclear Envelope Breakdown (R-HSA-2980766)           | 47   | 16  | 3.06   | + | 5.23  | 1.83E-03 |
| rRNA processing nucleolus/cytosol (R-HSA-6791226)    | 182  | 33  | 11.85  | + | 2.79  | 2.12E-03 |

|                                                        |     |    |       |   |       |          |
|--------------------------------------------------------|-----|----|-------|---|-------|----------|
| SUMO E3 ligases SUMOylate (R-HSA-3108232)              | 157 | 30 | 10.22 | + | 2.94  | 2.55E-03 |
| Lagging Strand Synthesis (R-HSA-69186)                 | 20  | 11 | 1.30  | + | 8.45  | 2.58E-03 |
| Vpr-mediated nuc import of PICs (R-HSA-180910)         | 31  | 13 | 2.02  | + | 6.44  | 3.04E-03 |
| SUMOylation of DNA replication prot (R-HSA-4615885)    | 43  | 15 | 2.80  | + | 5.36  | 3.13E-03 |
| Telomere Maintenance (R-HSA-157579)                    | 93  | 22 | 6.05  | + | 3.63  | 3.47E-03 |
| NS1 Mediated Effect Host Pathways (R-HSA-168276)       | 38  | 14 | 2.47  | + | 5.66  | 4.15E-03 |
| Antiviral mech by IFN-stim genes (R-HSA-1169410)       | 79  | 20 | 5.14  | + | 3.89  | 4.23E-03 |
| Regof APC/C actvs G1/S anaphase (R-HSA-176408)         | 80  | 20 | 5.21  | + | 3.84  | 4.98E-03 |
| Sig Rho GTPases RHOBTB3 (R-HSA-9716542)                | 685 | 80 | 44.58 | + | 1.79  | 5.19E-03 |
| Mitochondrial translation term(R-HSA-5419276)          | 88  | 21 | 5.73  | + | 3.67  | 5.29E-03 |
| Mitotic Prophase (R-HSA-68875)                         | 104 | 23 | 6.77  | + | 3.40  | 5.44E-03 |
| RNA Polymerase II Transcription Term (R-HSA-73856)     | 66  | 18 | 4.30  | + | 4.19  | 5.63E-03 |
| SCF(Skp2) degradation of p27/p21 (R-HSA-187577)        | 59  | 17 | 3.84  | + | 4.43  | 5.69E-03 |
| Cyclin E associated G1/S transition (R-HSA-69202)      | 82  | 20 | 5.34  | + | 3.75  | 6.88E-03 |
| Interactions of Vpr with host cell prot (R-HSA-176033) | 34  | 13 | 2.21  | + | 5.87  | 6.94E-03 |
| APC/C:Cdc20 med deg mitotic prot (R-HSA-176409)        | 75  | 19 | 4.88  | + | 3.89  | 7.53E-03 |
| Nucleosome assembly (R-HSA-774815)                     | 54  | 16 | 3.51  | + | 4.55  | 8.27E-03 |
| Dep CENPA nucleosomes centromere (R-HSA-606279)        | 54  | 16 | 3.51  | + | 4.55  | 8.27E-03 |
| Viral Messenger RNA Synthesis (R-HSA-168325)           | 41  | 14 | 2.67  | + | 5.25  | 8.60E-03 |
| Reg by Glucokinase Regulatory Protein (R-HSA-170822)   | 29  | 12 | 1.89  | + | 6.36  | 8.65E-03 |
| Def TPR suscep thyroid pap carci (R-HSA-5619107)       | 29  | 12 | 1.89  | + | 6.36  | 8.65E-03 |
| RHO GTPase Effectors (R-HSA-195258)                    | 288 | 43 | 18.74 | + | 2.29  | 8.76E-03 |
| APC/C APC/C:Cdc20 med deg mit prot (R-HSA-176814)      | 76  | 19 | 4.95  | + | 3.84  | 8.87E-03 |
| SUMO ubiquitinylation proteins (R-HSA-3232142)         | 35  | 13 | 2.28  | + | 5.71  | 8.99E-03 |
| Cyclin A:Cdk2-assoc S phase entry (R-HSA-69656)        | 84  | 20 | 5.47  | + | 3.66  | 9.40E-03 |
| Leading Strand Synthesis (R-HSA-69109)                 | 14  | 9  | .91   | + | 9.88  | 9.63E-03 |
| Polymerase switching (R-HSA-69091)                     | 14  | 9  | .91   | + | 9.88  | 9.63E-03 |
| Postmitotic nucpore complex (R-HSA-9615933)            | 24  | 11 | 1.56  | + | 7.04  | 1.01E-02 |
| Folding of actin by CCT/TrIC (R-HSA-390450)            | 10  | 8  | .65   | + | 12.29 | 1.07E-02 |

|                                                         |     |      |       |      |          |          |
|---------------------------------------------------------|-----|------|-------|------|----------|----------|
| tRNA Aminoacylation (R-HSA-379724)                      | 42  | 14   | 2.73  | +    | 5.12     | 1.08E-02 |
| Nuclear Envelope (NE) Reassembly (R-HSA-2995410)        | 70  | 18   | 4.56  | +    | 3.95     | 1.13E-02 |
| Glucose metabolism (R-HSA-70326)                        | 86  | 20   | 5.60  | +    | 3.57     | 1.27E-02 |
| ISG15 antiviral mechanism (R-HSA-1169408)71             | 18  | 4.62 | +     | 3.90 | 1.34E-02 |          |
| SUMOylationRNA binding proteins (R-HSA-4570464)         | 43  | 14   | 2.80  | +    | 5.00     | 1.36E-02 |
| Res AP sites multiple-nucleotide (R-HSA-110373)         | 25  | 11   | 1.63  | +    | 6.76     | 1.38E-02 |
| CDK-med Phosphor removal of Cdc6 (R-HSA-69017)          | 72  | 18   | 4.69  | +    | 3.84     | 1.58E-02 |
| Cdc20:Phospho-APC/C deg Cyclin A (R-HSA-174184)         | 72  | 18   | 4.69  | +    | 3.84     | 1.58E-02 |
| Signaling by GPCR (R-HSA-372790)                        | 697 | 18   | 45.36 | -    | .40      | 1.69E-02 |
| Signaling by Rho GTPases (R-HSA-194315)                 | 670 | 77   | 43.61 | +    | 1.77     | 1.74E-02 |
| CDC6 assoc w/ORC:origin complex (R-HSA-68689)           | 11  | 8    | .72   | +    | 11.17    | 1.75E-02 |
| Polymerase switch C-strand telomere (R-HSA-174411)      | 26  | 11   | 1.69  | +    | 6.50     | 1.85E-02 |
| APC:Cdc20 deg cell cycle checkpoint (R-HSA-179419)      | 73  | 18   | 4.75  | +    | 3.79     | 1.86E-02 |
| G1/S DNA Damage Checkpoints (R-HSA-69615)               | 66  | 17   | 4.30  | +    | 3.96     | 2.02E-02 |
| HIV Life Cycle (R-HSA-162587)                           | 149 | 27   | 9.70  | +    | 2.78     | 2.02E-02 |
| GPCR downstream signalling (R-HSA-388396)               | 624 | 15   | 40.61 | -    | .37      | 2.39E-02 |
| SUMOylation of chromatin org (R-HSA-4551638)            | 53  | 15   | 3.45  | +    | 4.35     | 2.63E-02 |
| Transcriptional Regulation by E2F6 (R-HSA-8953750)      | 34  | 12   | 2.21  | +    | 5.42     | 3.21E-02 |
| Class A/1 (Rhodopsin-like receptors) (R-HSA-373076)     | 331 | 4    | 21.54 | -    | .19      | 3.27E-02 |
| Diseases of programmed cell death (R-HSA-9645723)       | 70  | 17   | 4.56  | +    | 3.73     | 3.89E-02 |
| E2F inhibition of pre-replication comp (R-HSA-113507) 9 |     | 7    | .59   | +    | 11.95    | 4.90E-02 |
