# Supplementary material for: RNA Sequencing in Hypoxia-Adapted T98G Glioblastoma Cells Provides Supportive Evidence for IRE1 as a Potential Therapeutic Target
Source: MDPI journal article supplement (doi:10.3390/genes14040841), 2023-03-31
Supplement: s1 [file s1]

Supplementary Table S4. All T98G GBM cell DEGs upregulated in normoxia at p<0.05

| GeneID    | baseMean | log2FoldCI | lfcSE    | stat     | p value  | q value  |
|-----------|----------|------------|----------|----------|----------|----------|
| PI15      | 2669.702 | 1.78405    | 0.13761  | 12.9645  | 1.94E-38 | 3.34E-35 |
| EGR1      | 877.8106 | 2.491494   | 0.222938 | 11.17573 | 5.36E-29 | 4.60E-26 |
| CTGF      | 1097.947 | 1.64391    | 0.161169 | 10.19995 | 1.98E-24 | 1.13E-21 |
| CYR61     | 3677.11  | 1.468209   | 0.144759 | 10.14246 | 3.58E-24 | 1.97E-21 |
| FOS       | 295.3963 | 2.383275   | 0.253047 | 9.418324 | 4.58E-21 | 1.91E-18 |
| TFRC      | 7722.422 | 1.640606   | 0.180698 | 9.079288 | 1.09E-19 | 3.59E-17 |
| CXCL8     | 299.0977 | 1.839728   | 0.212647 | 8.651543 | 5.08E-18 | 1.54E-15 |
| TNFRSF11I | 4666.286 | 1.487649   | 0.187016 | 7.95465  | 1.80E-15 | 4.47E-13 |
| KITLG     | 1394.838 | 0.991629   | 0.128947 | 7.690227 | 1.47E-14 | 3.49E-12 |
| DUSP1     | 1051.617 | 1.497167   | 0.195303 | 7.665878 | 1.78E-14 | 4.09E-12 |
| POP1      | 783.1456 | 1.249457   | 0.167539 | 7.457714 | 8.80E-14 | 1.91E-11 |
| Iacc1     | 606.4675 | 1.26657    | 0.173179 | 7.313664 | 2.60E-13 | 5.42E-11 |
| PSAT1     | 1533.36  | 1.325041   | 0.181923 | 7.283531 | 3.25E-13 | 6.69E-11 |
| PIK3R3    | 670.3225 | 0.985647   | 0.141609 | 6.960314 | 3.40E-12 | 6.02E-10 |
| DDX5      | 13116.55 | 0.800512   | 0.115746 | 6.916121 | 4.64E-12 | 7.96E-10 |
| RDH10     | 901.3256 | 0.869352   | 0.129363 | 6.720276 | 1.81E-11 | 2.75E-09 |
| PCNA      | 3854.774 | 0.980489   | 0.148324 | 6.610442 | 3.83E-11 | 5.63E-09 |
| CDCA7     | 2235.654 | 0.713928   | 0.110635 | 6.45299  | 1.10E-10 | 1.46E-08 |
| SCG5      | 211.3164 | 1.267086   | 0.196564 | 6.446181 | 1.15E-10 | 1.51E-08 |
| SHISA2    | 235.052  | 1.048679   | 0.163668 | 6.407364 | 1.48E-10 | 1.90E-08 |
| SFPQ      | 7584.664 | 0.795397   | 0.126042 | 6.31056  | 2.78E-10 | 3.41E-08 |
| HSPA8     | 40716.35 | 0.706301   | 0.112216 | 6.294108 | 3.09E-10 | 3.67E-08 |
| TRA2B     | 4366.643 | 0.773512   | 0.124615 | 6.207202 | 5.39E-10 | 6.08E-08 |
| GADD45A   | 783.5922 | 0.83058    | 0.134204 | 6.18896  | 6.06E-10 | 6.75E-08 |
| GART      | 3448.805 | 0.659168   | 0.10657  | 6.185335 | 6.20E-10 | 6.83E-08 |
| PMAIP1    | 1088.664 | 0.909972   | 0.14742  | 6.172671 | 6.71E-10 | 7.30E-08 |
| IER2      | 623.5147 | 1.114078   | 0.180974 | 6.15601  | 7.46E-10 | 8.00E-08 |
| TIGAR     | 174.8846 | 1.289796   | 0.211424 | 6.100532 | 1.06E-09 | 1.10E-07 |
| GSG2      | 424.1537 | 0.861177   | 0.141871 | 6.07013  | 1.28E-09 | 1.30E-07 |
| ZNF367    | 548.71   | 0.826676   | 0.136542 | 6.054383 | 1.41E-09 | 1.42E-07 |
| CCNE2     | 893.0958 | 0.894382   | 0.148077 | 6.039986 | 1.54E-09 | 1.54E-07 |
| KLHL23    | 292.2275 | 1.029756   | 0.170475 | 6.040503 | 1.54E-09 | 1.54E-07 |
| AUNIP     | 166.7726 | 1.28921    | 0.215088 | 5.993864 | 2.05E-09 | 1.99E-07 |
| HEATR3    | 600.0289 | 0.801331   | 0.136362 | 5.876518 | 4.19E-09 | 3.87E-07 |
| c21orf91  | 1611.904 | 0.6895     | 0.117621 | 5.862033 | 4.57E-09 | 4.18E-07 |
| LUCAT1    | 3183.657 | 0.688319   | 0.117573 | 5.854385 | 4.79E-09 | 4.35E-07 |
| EXO1      | 2011.458 | 0.857153   | 0.146623 | 5.845947 | 5.04E-09 | 4.52E-07 |
| MCM10     | 921.1119 | 0.96972    | 0.166285 | 5.831673 | 5.49E-09 | 4.84E-07 |
| FAM111B   | 924.3134 | 1.119156   | 0.192398 | 5.816894 | 6.00E-09 | 5.23E-07 |
| MCM3      | 3922.175 | 0.734859   | 0.126989 | 5.786793 | 7.17E-09 | 6.15E-07 |
| IQGAP2    | 380.7855 | 0.865655   | 0.150188 | 5.763827 | 8.22E-09 | 6.86E-07 |
| CDC25A    | 532.5141 | 0.936443   | 0.162728 | 5.754652 | 8.68E-09 | 7.17E-07 |
| WDR76     | 1455.676 | 0.826085   | 0.144525 | 5.715846 | 1.09E-08 | 8.82E-07 |
| MCMBP     | 2228.833 | 0.638522   | 0.112036 | 5.699282 | 1.20E-08 | 9.62E-07 |
| FH        | 2535.557 | 0.632683   | 0.111114 | 5.694015 | 1.24E-08 | 9.87E-07 |
| GPATCH4   | 583.4927 | 0.742189   | 0.130575 | 5.684017 | 1.32E-08 | 1.04E-06 |

|          |          |          |          |          |          |          |
|----------|----------|----------|----------|----------|----------|----------|
| ENTPD1   | 438.7558 | 0.800894 | 0.142104 | 5.635974 | 1.74E-08 | 1.36E-06 |
| PFKFB2   | 561.4499 | 0.73704  | 0.131393 | 5.609414 | 2.03E-08 | 1.57E-06 |
| COA7     | 559.5563 | 0.719686 | 0.128334 | 5.607929 | 2.05E-08 | 1.57E-06 |
| NOP56    | 3518.039 | 0.58398  | 0.104198 | 5.604529 | 2.09E-08 | 1.59E-06 |
| CYCS     | 6820.99  | 0.778907 | 0.140572 | 5.540995 | 3.01E-08 | 2.21E-06 |
| CLSPN    | 1196.813 | 1.056944 | 0.190952 | 5.535138 | 3.11E-08 | 2.26E-06 |
| PPARGC1B | 341.8861 | 0.896473 | 0.162132 | 5.529277 | 3.22E-08 | 2.32E-06 |
| tsen15   | 1518.106 | 0.724348 | 0.131262 | 5.51835  | 3.42E-08 | 2.46E-06 |
| DNA2     | 689.2989 | 0.841584 | 0.152653 | 5.513055 | 3.53E-08 | 2.51E-06 |
| POLD3    | 1877.853 | 0.676032 | 0.122987 | 5.496783 | 3.87E-08 | 2.71E-06 |
| NASP     | 5272.571 | 0.687186 | 0.125006 | 5.497239 | 3.86E-08 | 2.71E-06 |
| RFC3     | 1624.258 | 0.802648 | 0.146219 | 5.489368 | 4.03E-08 | 2.80E-06 |
| ODC1     | 859.7376 | 0.93184  | 0.169969 | 5.482407 | 4.20E-08 | 2.90E-06 |
| ENC1     | 839.5628 | 0.685143 | 0.125217 | 5.471645 | 4.46E-08 | 3.06E-06 |
| LDHB     | 13073.54 | 0.56985  | 0.104926 | 5.430951 | 5.61E-08 | 3.65E-06 |
| CTPS1    | 2419.762 | 0.839909 | 0.154669 | 5.430376 | 5.62E-08 | 3.65E-06 |
| DTL      | 2092.301 | 0.770959 | 0.142261 | 5.419336 | 5.98E-08 | 3.86E-06 |
| DDX20    | 879.8137 | 0.697551 | 0.129427 | 5.389539 | 7.06E-08 | 4.51E-06 |
| IER5     | 513.7023 | 0.801623 | 0.149884 | 5.348303 | 8.88E-08 | 5.59E-06 |
| CCT5     | 9552.853 | 0.601051 | 0.112603 | 5.337805 | 9.41E-08 | 5.88E-06 |
| NDUFAF4  | 229.3103 | 0.955177 | 0.179201 | 5.330195 | 9.81E-08 | 6.08E-06 |
| HSPH1    | 4665.711 | 0.865963 | 0.163789 | 5.287077 | 1.24E-07 | 7.44E-06 |
| ZFAND5   | 6311.246 | 0.563584 | 0.10676  | 5.278977 | 1.30E-07 | 7.71E-06 |
| RFX5     | 1450.598 | 0.585096 | 0.110884 | 5.276658 | 1.32E-07 | 7.78E-06 |
| DNAJA1   | 4438.737 | 0.614367 | 0.116882 | 5.256318 | 1.47E-07 | 8.59E-06 |
| DNAJC9   | 774.6746 | 0.66513  | 0.127013 | 5.236725 | 1.63E-07 | 9.49E-06 |
| ESCO2    | 1025.033 | 0.862836 | 0.165935 | 5.19985  | 1.99E-07 | 1.14E-05 |
| TRMT10C  | 535.5218 | 0.726907 | 0.14054  | 5.172232 | 2.31E-07 | 1.29E-05 |
| PRMT3    | 1064.353 | 0.770658 | 0.149005 | 5.172026 | 2.32E-07 | 1.29E-05 |
| PBK      | 1848.373 | 0.722676 | 0.140428 | 5.146232 | 2.66E-07 | 1.46E-05 |
| HNRNPAB  | 3038.272 | 0.58556  | 0.114192 | 5.127828 | 2.93E-07 | 1.60E-05 |
| hspe1    | 1665.885 | 0.684127 | 0.133802 | 5.112985 | 3.17E-07 | 1.71E-05 |
| BAZ1A    | 1361.233 | 0.676948 | 0.133092 | 5.086324 | 3.65E-07 | 1.93E-05 |
| DHX9     | 5947.319 | 0.678591 | 0.133423 | 5.085999 | 3.66E-07 | 1.93E-05 |
| PNO1     | 583.881  | 0.706961 | 0.139157 | 5.080326 | 3.77E-07 | 1.99E-05 |
| PRIM1    | 607.3454 | 0.867387 | 0.171393 | 5.060805 | 4.17E-07 | 2.18E-05 |
| CACYBP   | 1915.875 | 0.666583 | 0.132238 | 5.040777 | 4.64E-07 | 2.39E-05 |
| GIN52    | 603.2847 | 0.789599 | 0.156649 | 5.040578 | 4.64E-07 | 2.39E-05 |
| HMGB1    | 9584.834 | 0.56804  | 0.1136   | 5.000337 | 5.72E-07 | 2.92E-05 |
| WDR77    | 1044.19  | 0.595666 | 0.119639 | 4.978865 | 6.40E-07 | 3.22E-05 |
| VRK1     | 707.7021 | 0.671449 | 0.135063 | 4.971357 | 6.65E-07 | 3.32E-05 |
| MCM8     | 2839.051 | 0.714733 | 0.144342 | 4.951658 | 7.36E-07 | 3.62E-05 |
| CCNL1    | 2593.827 | 0.690908 | 0.139862 | 4.939926 | 7.82E-07 | 3.82E-05 |
| AKIRIN1  | 1265.135 | 0.589515 | 0.119451 | 4.935187 | 8.01E-07 | 3.90E-05 |
| CDC6     | 1593.919 | 0.7968   | 0.161603 | 4.930609 | 8.20E-07 | 3.98E-05 |
| PNPT1    | 1504.912 | 0.745288 | 0.151732 | 4.91186  | 9.02E-07 | 4.31E-05 |
| UNG      | 1027.105 | 0.579814 | 0.118099 | 4.909559 | 9.13E-07 | 4.35E-05 |

|          |          |          |          |          |          |          |
|----------|----------|----------|----------|----------|----------|----------|
| LOC28456 | 90.20389 | 1.593347 | 0.324772 | 4.906049 | 9.29E-07 | 4.40E-05 |
| BLM      | 1085.069 | 0.898194 | 0.184128 | 4.878093 | 1.07E-06 | 5.03E-05 |
| PNN      | 2217.124 | 0.622697 | 0.127851 | 4.870479 | 1.11E-06 | 5.21E-05 |
| CCT6A    | 7045.031 | 0.619087 | 0.127945 | 4.838686 | 1.31E-06 | 5.93E-05 |
| POLA1    | 1603.506 | 0.757618 | 0.156612 | 4.837541 | 1.31E-06 | 5.95E-05 |
| SLC7A2   | 651.9876 | 0.692198 | 0.143405 | 4.826885 | 1.39E-06 | 6.22E-05 |
| PSMG1    | 1001.864 | 0.700472 | 0.145815 | 4.803847 | 1.56E-06 | 6.96E-05 |
| THEM4    | 234.9952 | 0.786793 | 0.164245 | 4.790364 | 1.66E-06 | 7.38E-05 |
| RBBP8    | 993.8348 | 0.698662 | 0.146015 | 4.784858 | 1.71E-06 | 7.57E-05 |
| DDIAS    | 562.4455 | 0.888305 | 0.185727 | 4.782867 | 1.73E-06 | 7.62E-05 |
| TWISTNB  | 1367.75  | 0.65195  | 0.1364   | 4.779708 | 1.76E-06 | 7.68E-05 |
| NEIL3    | 2362.113 | 0.586876 | 0.122939 | 4.773701 | 1.81E-06 | 7.84E-05 |
| EXOSC8   | 1043.18  | 0.686423 | 0.144076 | 4.764308 | 1.90E-06 | 8.07E-05 |
| SRSF7    | 2754.503 | 0.512673 | 0.107721 | 4.759252 | 1.94E-06 | 8.24E-05 |
| PSME3    | 1633.461 | 0.588409 | 0.123792 | 4.753221 | 2.00E-06 | 8.47E-05 |
| GPD2     | 3477.235 | 0.542356 | 0.114148 | 4.751322 | 2.02E-06 | 8.50E-05 |
| NAMPT    | 7878.546 | 0.779129 | 0.163966 | 4.751781 | 2.02E-06 | 8.50E-05 |
| MRPL47   | 1108.602 | 0.715143 | 0.15068  | 4.746105 | 2.07E-06 | 8.69E-05 |
| adamts1  | 1077.846 | 0.567912 | 0.119696 | 4.744606 | 2.09E-06 | 8.72E-05 |
| XRCC2    | 777.5377 | 0.805818 | 0.17042  | 4.728418 | 2.26E-06 | 9.31E-05 |
| C1QBP    | 2555.133 | 0.572709 | 0.121246 | 4.723516 | 2.32E-06 | 9.47E-05 |
| ASNS     | 2524.259 | 0.955662 | 0.20249  | 4.719545 | 2.36E-06 | 9.60E-05 |
| NCL      | 12364.94 | 0.466317 | 0.098994 | 4.710547 | 2.47E-06 | 0.0001   |
| KPNA2    | 8139.075 | 0.586748 | 0.124731 | 4.704123 | 2.55E-06 | 0.000103 |
| LYPD6    | 293.2479 | 0.848537 | 0.180718 | 4.695378 | 2.66E-06 | 0.000107 |
| AIFM1    | 1274.634 | 0.546611 | 0.116576 | 4.688886 | 2.75E-06 | 0.00011  |
| ATAD2    | 6168.357 | 0.667786 | 0.142588 | 4.683315 | 2.82E-06 | 0.000113 |
| RBL1     | 1039.713 | 0.721863 | 0.154121 | 4.683724 | 2.82E-06 | 0.000113 |
| HSPA4    | 6388.567 | 0.59885  | 0.128325 | 4.666648 | 3.06E-06 | 0.00012  |
| MIS18A   | 659.581  | 0.617301 | 0.132266 | 4.667111 | 3.05E-06 | 0.00012  |
| SNRPD1   | 1036.657 | 0.676358 | 0.144923 | 4.667001 | 3.06E-06 | 0.00012  |
| USP1     | 3167.17  | 0.649761 | 0.13969  | 4.651435 | 3.30E-06 | 0.000129 |
| ME2      | 977.3506 | 0.673818 | 0.144894 | 4.65041  | 3.31E-06 | 0.000129 |
| H3F3B    | 8940.676 | 0.482505 | 0.103797 | 4.64857  | 3.34E-06 | 0.00013  |
| FEN1     | 1734.044 | 0.622321 | 0.134161 | 4.638598 | 3.51E-06 | 0.000135 |
| SRSF6    | 4835.01  | 0.53682  | 0.115886 | 4.632319 | 3.62E-06 | 0.000139 |
| NMI      | 159.1007 | 0.858399 | 0.185411 | 4.629712 | 3.66E-06 | 0.000141 |
| PTPN22   | 34.21963 | 1.721924 | 0.372676 | 4.620427 | 3.83E-06 | 0.000146 |
| C5       | 582.3693 | 0.659106 | 0.143008 | 4.608864 | 4.05E-06 | 0.000154 |
| CSE1L    | 8516.429 | 0.664581 | 0.14462  | 4.59536  | 4.32E-06 | 0.000164 |
| BCL2     | 123.8175 | 1.005552 | 0.218842 | 4.594884 | 4.33E-06 | 0.000164 |
| CCNE1    | 244.2311 | 0.728109 | 0.15859  | 4.59114  | 4.41E-06 | 0.000166 |
| CEP78    | 600.4745 | 0.68181  | 0.148775 | 4.582837 | 4.59E-06 | 0.000172 |
| CCDC77   | 1082.023 | 0.566474 | 0.123639 | 4.581686 | 4.61E-06 | 0.000173 |
| NCAPD3   | 3054.847 | 0.55256  | 0.12065  | 4.579857 | 4.65E-06 | 0.000173 |
| DDX52    | 1581.712 | 0.569109 | 0.124255 | 4.580181 | 4.65E-06 | 0.000173 |
| FOSB     | 67.2697  | 1.905692 | 0.416993 | 4.570082 | 4.88E-06 | 0.000181 |

|         |          |          |          |          |          |          |
|---------|----------|----------|----------|----------|----------|----------|
| SRSF3   | 5762.315 | 0.610597 | 0.133627 | 4.56942  | 4.89E-06 | 0.000181 |
| CDC7    | 859.6008 | 0.789045 | 0.17282  | 4.565708 | 4.98E-06 | 0.000184 |
| GINS3   | 375.8762 | 0.89911  | 0.197096 | 4.561792 | 5.07E-06 | 0.000187 |
| MELK    | 2006.291 | 0.645094 | 0.141476 | 4.559756 | 5.12E-06 | 0.000188 |
| SLBP    | 1447.455 | 0.502377 | 0.110432 | 4.54918  | 5.39E-06 | 0.000196 |
| HSPA9   | 11089.71 | 0.526688 | 0.115773 | 4.549326 | 5.38E-06 | 0.000196 |
| GMNN    | 794.1303 | 0.687533 | 0.151539 | 4.536993 | 5.71E-06 | 0.000206 |
| E2F3    | 977.9507 | 0.580014 | 0.127856 | 4.536476 | 5.72E-06 | 0.000206 |
| RFC4    | 1375.136 | 0.606945 | 0.133817 | 4.535633 | 5.74E-06 | 0.000206 |
| RWDD2B  | 549.8174 | 0.631746 | 0.139321 | 4.534466 | 5.77E-06 | 0.000206 |
| EIF5    | 3131.432 | 0.637464 | 0.140584 | 4.534407 | 5.78E-06 | 0.000206 |
| UTP15   | 1005.264 | 0.645369 | 0.14234  | 4.53401  | 5.79E-06 | 0.000206 |
| TTL     | 1646.663 | 0.624558 | 0.137873 | 4.529957 | 5.90E-06 | 0.000209 |
| SNORD83 | 47.69684 | 1.461059 | 0.323418 | 4.517555 | 6.26E-06 | 0.000218 |
| STARD7  | 5427.193 | 0.471    | 0.104382 | 4.512253 | 6.41E-06 | 0.000223 |
| EZH2    | 1535.623 | 0.666656 | 0.147904 | 4.507357 | 6.56E-06 | 0.000228 |
| RFK     | 386.6413 | 0.706749 | 0.156983 | 4.502064 | 6.73E-06 | 0.000232 |
| WDHD1   | 1166.715 | 0.663814 | 0.147575 | 4.498137 | 6.86E-06 | 0.000235 |
| AP1AR   | 409.8483 | 0.673742 | 0.149925 | 4.493848 | 6.99E-06 | 0.000239 |
| AXIN2   | 115.0192 | 0.930537 | 0.207296 | 4.488926 | 7.16E-06 | 0.000244 |
| RAD54B  | 694.1189 | 0.847843 | 0.189049 | 4.484767 | 7.30E-06 | 0.000249 |
| RRS1    | 205.3103 | 0.768418 | 0.171411 | 4.482895 | 7.36E-06 | 0.00025  |
| FKBP5   | 893.8275 | 0.683288 | 0.152494 | 4.480766 | 7.44E-06 | 0.000252 |
| c4orf46 | 755.1967 | 0.609629 | 0.136141 | 4.477921 | 7.54E-06 | 0.000254 |
| URB2    | 611.7297 | 0.619194 | 0.138498 | 4.470776 | 7.79E-06 | 0.00026  |
| GINS1   | 1662.054 | 0.57823  | 0.129757 | 4.456244 | 8.34E-06 | 0.000277 |
| NDUFAF5 | 534.5568 | 0.605206 | 0.136192 | 4.443767 | 8.84E-06 | 0.000292 |
| TFAM    | 985.5704 | 0.635265 | 0.14318  | 4.43682  | 9.13E-06 | 0.000299 |
| ORC6    | 705.1521 | 0.658185 | 0.148346 | 4.436823 | 9.13E-06 | 0.000299 |
| PDSS1   | 164.4121 | 0.865597 | 0.195092 | 4.436864 | 9.13E-06 | 0.000299 |
| RNF157  | 103.1491 | 1.001328 | 0.225781 | 4.43496  | 9.21E-06 | 0.000301 |
| IFRD1   | 2684.869 | 0.548818 | 0.123829 | 4.432052 | 9.33E-06 | 0.000303 |
| POLA2   | 950.5683 | 0.568322 | 0.12824  | 4.431719 | 9.35E-06 | 0.000303 |
| TPRKB   | 463.5785 | 0.790751 | 0.178405 | 4.432336 | 9.32E-06 | 0.000303 |
| TCP1    | 4525.464 | 0.514482 | 0.116199 | 4.427578 | 9.53E-06 | 0.000308 |
| CMSS1   | 848.649  | 0.565967 | 0.127818 | 4.427902 | 9.52E-06 | 0.000308 |
| LIN9    | 607.3986 | 0.749347 | 0.169345 | 4.424967 | 9.65E-06 | 0.000311 |
| EIF2B3  | 1262.196 | 0.542045 | 0.122643 | 4.419707 | 9.88E-06 | 0.000317 |
| KLF6    | 1684.197 | 0.497802 | 0.113009 | 4.404974 | 1.06E-05 | 0.000337 |
| OXCT1   | 976.0887 | 0.744502 | 0.169065 | 4.403632 | 1.06E-05 | 0.000338 |
| NOP58   | 1814.955 | 0.582853 | 0.132535 | 4.397738 | 1.09E-05 | 0.000347 |
| SCLY    | 206.4235 | 0.849927 | 0.19344  | 4.393753 | 1.11E-05 | 0.000351 |
| LMNB1   | 5072.943 | 0.531103 | 0.12103  | 4.388205 | 1.14E-05 | 0.000356 |
| vsig10  | 531.0818 | 0.591811 | 0.134863 | 4.388239 | 1.14E-05 | 0.000356 |
| MCM6    | 1672.669 | 0.68401  | 0.155954 | 4.385987 | 1.15E-05 | 0.000359 |
| TMEM19  | 669.0629 | 0.714285 | 0.16287  | 4.385613 | 1.16E-05 | 0.000359 |
| LYAR    | 383.6739 | 0.666255 | 0.15212  | 4.379805 | 1.19E-05 | 0.000366 |

|          |          |          |          |          |          |          |
|----------|----------|----------|----------|----------|----------|----------|
| PHTF2    | 2372.678 | 0.542239 | 0.123831 | 4.378876 | 1.19E-05 | 0.000367 |
| CACHD1   | 184.1777 | 0.746028 | 0.170407 | 4.377909 | 1.20E-05 | 0.000368 |
| SLC25A13 | 1650.363 | 0.582728 | 0.133169 | 4.375855 | 1.21E-05 | 0.00037  |
| KIAA1551 | 2065.285 | 0.604334 | 0.138191 | 4.373193 | 1.22E-05 | 0.000374 |
| UBLCP1   | 1187.183 | 0.643271 | 0.147184 | 4.370522 | 1.24E-05 | 0.000378 |
| E2F6     | 415.0482 | 0.672164 | 0.153819 | 4.369842 | 1.24E-05 | 0.000379 |
| TLR4     | 626.1234 | 0.651504 | 0.149348 | 4.362329 | 1.29E-05 | 0.000387 |
| MSH2     | 1636.841 | 0.686923 | 0.157465 | 4.362382 | 1.29E-05 | 0.000387 |
| MIR21    | 157.5361 | 0.942655 | 0.216257 | 4.358952 | 1.31E-05 | 0.000392 |
| ENPP2    | 232.5724 | 0.73419  | 0.168759 | 4.350514 | 1.36E-05 | 0.000407 |
| RFWD3    | 2750.607 | 0.515312 | 0.118509 | 4.348304 | 1.37E-05 | 0.000409 |
| TRIM2    | 900.4993 | 0.526453 | 0.121089 | 4.347666 | 1.38E-05 | 0.000409 |
| COPS3    | 1871.554 | 0.565374 | 0.130006 | 4.348831 | 1.37E-05 | 0.000409 |
| SLIRP    | 552.5996 | 0.629582 | 0.144855 | 4.3463   | 1.38E-05 | 0.00041  |
| PPM1D    | 367.8828 | 0.673666 | 0.155071 | 4.344247 | 1.40E-05 | 0.000413 |
| magoh    | 492.946  | 0.572842 | 0.131882 | 4.343584 | 1.40E-05 | 0.000414 |
| ANAPC7   | 1143.883 | 0.550988 | 0.126953 | 4.340111 | 1.42E-05 | 0.000418 |
| RNU5B-1  | 32.41905 | 1.68059  | 0.387498 | 4.337026 | 1.44E-05 | 0.000423 |
| GPD1L    | 378.0724 | 0.620809 | 0.143252 | 4.333694 | 1.47E-05 | 0.000428 |
| CCT2     | 5071.488 | 0.529059 | 0.1221   | 4.333    | 1.47E-05 | 0.000428 |
| CBFB     | 3202.159 | 0.505378 | 0.116662 | 4.331972 | 1.48E-05 | 0.000429 |
| LTV1     | 758.1636 | 0.632712 | 0.146078 | 4.331325 | 1.48E-05 | 0.000429 |
| HNRNPA2I | 11820.04 | 0.525805 | 0.121436 | 4.329885 | 1.49E-05 | 0.000431 |
| CCDC69   | 304.458  | 0.783443 | 0.180984 | 4.328796 | 1.50E-05 | 0.000433 |
| TMEM38B  | 496.8883 | 0.6239   | 0.144337 | 4.32252  | 1.54E-05 | 0.000444 |
| FANCI    | 3817.234 | 0.630866 | 0.146043 | 4.319734 | 1.56E-05 | 0.000447 |
| SUSD5    | 319.8774 | 0.652333 | 0.151263 | 4.312566 | 1.61E-05 | 0.00046  |
| Snhg4    | 284.0418 | 0.71584  | 0.166009 | 4.312064 | 1.62E-05 | 0.00046  |
| EEF1E1   | 857.7722 | 0.616613 | 0.143032 | 4.311016 | 1.63E-05 | 0.000461 |
| SMC6     | 1465.223 | 0.623235 | 0.144586 | 4.310472 | 1.63E-05 | 0.000461 |
| DHFR     | 2826.267 | 0.645542 | 0.149821 | 4.308755 | 1.64E-05 | 0.000463 |
| NOL11    | 1782.578 | 0.598396 | 0.138928 | 4.307235 | 1.65E-05 | 0.000466 |
| HMGB3    | 1806.959 | 0.522547 | 0.12138  | 4.305044 | 1.67E-05 | 0.000469 |
| CENPN    | 1518.278 | 0.586231 | 0.136423 | 4.297154 | 1.73E-05 | 0.000483 |
| TXNDC9   | 1004.775 | 0.596982 | 0.13898  | 4.29545  | 1.74E-05 | 0.000486 |
| ASNSD1   | 791.067  | 0.625451 | 0.145718 | 4.292202 | 1.77E-05 | 0.000491 |
| BCL2L11  | 321.2735 | 0.672272 | 0.156674 | 4.290883 | 1.78E-05 | 0.000493 |
| CYP1B1   | 651.3673 | 0.576621 | 0.134417 | 4.289795 | 1.79E-05 | 0.000494 |
| TMPO     | 5366.277 | 0.635284 | 0.14825  | 4.285217 | 1.83E-05 | 0.000502 |
| polr3g   | 537.3754 | 0.715522 | 0.166961 | 4.285572 | 1.82E-05 | 0.000502 |
| PAK1IP1  | 727.9656 | 0.695901 | 0.162583 | 4.28029  | 1.87E-05 | 0.000513 |
| FAM111A  | 2622.419 | 0.576455 | 0.134731 | 4.278579 | 1.88E-05 | 0.000515 |
| UBE2G1   | 2330.862 | 0.561254 | 0.131205 | 4.277691 | 1.89E-05 | 0.000516 |
| TARS     | 5865.215 | 0.51203  | 0.119817 | 4.273417 | 1.93E-05 | 0.000524 |
| THAP12   | 1731.446 | 0.599931 | 0.140532 | 4.269001 | 1.96E-05 | 0.000533 |
| nfbiz    | 552.0548 | 0.858263 | 0.20132  | 4.263175 | 2.02E-05 | 0.000544 |
| CBX3     | 7441.843 | 0.474981 | 0.111511 | 4.259493 | 2.05E-05 | 0.000551 |

|           |          |          |          |          |          |          |
|-----------|----------|----------|----------|----------|----------|----------|
| BRIX1     | 2585.732 | 0.600416 | 0.140965 | 4.259335 | 2.05E-05 | 0.000551 |
| IDH3A     | 1221.453 | 0.570514 | 0.134629 | 4.237679 | 2.26E-05 | 0.000602 |
| AHSA1     | 1050.562 | 0.480802 | 0.113492 | 4.23645  | 2.27E-05 | 0.000604 |
| ZWILCH    | 1010.639 | 0.731988 | 0.172937 | 4.232696 | 2.31E-05 | 0.000611 |
| TMOD2     | 514.1772 | 0.631982 | 0.149484 | 4.227751 | 2.36E-05 | 0.000624 |
| DENND6A   | 1045.948 | 0.533348 | 0.126173 | 4.227113 | 2.37E-05 | 0.000625 |
| UBR7      | 659.8517 | 0.59146  | 0.140313 | 4.215283 | 2.49E-05 | 0.000653 |
| FYTTD1    | 2887.794 | 0.50157  | 0.119046 | 4.213262 | 2.52E-05 | 0.000657 |
| MMS22L    | 1323.186 | 0.696719 | 0.165395 | 4.212453 | 2.53E-05 | 0.000658 |
| TOPORS    | 1129.199 | 0.54778  | 0.130107 | 4.210212 | 2.55E-05 | 0.000663 |
| SPRTN     | 412.8003 | 0.63786  | 0.15154  | 4.209191 | 2.56E-05 | 0.000665 |
| SKA2      | 1007.272 | 0.576828 | 0.1371   | 4.207348 | 2.58E-05 | 0.000668 |
| NIPA2     | 1905.977 | 0.510511 | 0.121401 | 4.205176 | 2.61E-05 | 0.000672 |
| INTS7     | 971.6041 | 0.580236 | 0.138278 | 4.196172 | 2.71E-05 | 0.000697 |
| CLIP1-AS1 | 54.11978 | 1.31394  | 0.313331 | 4.193458 | 2.75E-05 | 0.000703 |
| CHCHD3    | 1775.964 | 0.581099 | 0.138771 | 4.187465 | 2.82E-05 | 0.00072  |
| FN1       | 12081.67 | 1.018395 | 0.243266 | 4.18634  | 2.83E-05 | 0.000721 |
| SEL1L3    | 950.9192 | 0.645639 | 0.154485 | 4.17931  | 2.92E-05 | 0.000742 |
| HSPA14    | 535.4488 | 0.5558   | 0.133095 | 4.175975 | 2.97E-05 | 0.000751 |
| LONRF2    | 189.6938 | 0.742885 | 0.177893 | 4.176011 | 2.97E-05 | 0.000751 |
| MCM4      | 4792.613 | 0.527086 | 0.126234 | 4.175483 | 2.97E-05 | 0.000751 |
| CDC45     | 703.8402 | 0.600145 | 0.14374  | 4.175227 | 2.98E-05 | 0.000751 |
| EXTL2     | 569.8102 | 0.599368 | 0.143727 | 4.170184 | 3.04E-05 | 0.000764 |
| MRPL42    | 1572.417 | 0.557661 | 0.13385  | 4.166316 | 3.10E-05 | 0.000775 |
| PSMA4     | 3701.197 | 0.578308 | 0.138859 | 4.164726 | 3.12E-05 | 0.000779 |
| HNRNPM    | 2247.605 | 0.603378 | 0.14491  | 4.163804 | 3.13E-05 | 0.00078  |
| ENOX2     | 302.8747 | 0.619711 | 0.148863 | 4.162961 | 3.14E-05 | 0.00078  |
| LRRCC1    | 393.801  | 0.758377 | 0.182171 | 4.162991 | 3.14E-05 | 0.00078  |
| H2AFZ     | 6449.602 | 0.459572 | 0.110427 | 4.161757 | 3.16E-05 | 0.000782 |
| GGCT      | 1176.737 | 0.580885 | 0.139585 | 4.161524 | 3.16E-05 | 0.000782 |
| PSMD1     | 6361.368 | 0.602537 | 0.144855 | 4.159575 | 3.19E-05 | 0.000785 |
| POGLUT1   | 784.9292 | 0.637733 | 0.153309 | 4.159784 | 3.19E-05 | 0.000785 |
| NCR3LG1   | 224.9052 | 0.757618 | 0.182216 | 4.157793 | 3.21E-05 | 0.000789 |
| MAT2A     | 5849.947 | 0.521667 | 0.125521 | 4.15603  | 3.24E-05 | 0.000793 |
| SLC25A12  | 626.3402 | 0.615595 | 0.148177 | 4.15445  | 3.26E-05 | 0.000798 |
| GOT1      | 1020.582 | 0.49747  | 0.120139 | 4.140786 | 3.46E-05 | 0.000841 |
| Uqcrrf1   | 1689.958 | 0.511706 | 0.123755 | 4.134832 | 3.55E-05 | 0.000861 |
| Hpfr1     | 436.2353 | 0.660433 | 0.159717 | 4.135013 | 3.55E-05 | 0.000861 |
| STIP1     | 5036.861 | 0.416991 | 0.10087  | 4.133943 | 3.57E-05 | 0.000863 |
| NARS      | 5017.518 | 0.484483 | 0.117265 | 4.131517 | 3.60E-05 | 0.000871 |
| CEP76     | 257.9219 | 0.670463 | 0.16232  | 4.130509 | 3.62E-05 | 0.000872 |
| GDAP1     | 224.5303 | 0.833125 | 0.201734 | 4.129822 | 3.63E-05 | 0.000873 |
| DCLRE1B   | 454.224  | 0.569442 | 0.138036 | 4.125308 | 3.70E-05 | 0.000887 |
| HSPD1     | 9531.703 | 0.605183 | 0.146834 | 4.121545 | 3.76E-05 | 0.000901 |
| RCBTB1    | 1637.245 | 0.478805 | 0.116194 | 4.120747 | 3.78E-05 | 0.000901 |
| E2F2      | 238.3504 | 0.771641 | 0.187474 | 4.115994 | 3.86E-05 | 0.000918 |
| AASDHPPT  | 1919.406 | 0.493688 | 0.120053 | 4.112238 | 3.92E-05 | 0.000931 |

|          |          |          |          |          |          |          |
|----------|----------|----------|----------|----------|----------|----------|
| NSMCE4A  | 334.8864 | 0.625117 | 0.152145 | 4.108682 | 3.98E-05 | 0.000944 |
| CCT3     | 5625.268 | 0.445744 | 0.108637 | 4.103049 | 4.08E-05 | 0.000965 |
| NME1     | 946.0908 | 0.616804 | 0.15047  | 4.099192 | 4.15E-05 | 0.00098  |
| ZWINT    | 1449.285 | 0.55225  | 0.13497  | 4.091648 | 4.28E-05 | 0.001005 |
| MARS2    | 130.3377 | 0.855678 | 0.209202 | 4.090189 | 4.31E-05 | 0.00101  |
| CNST     | 1076.652 | 0.508492 | 0.124455 | 4.085754 | 4.39E-05 | 0.001025 |
| PHTF1    | 1124.021 | 0.538513 | 0.131817 | 4.085297 | 4.40E-05 | 0.001025 |
| OSTM1    | 1311.964 | 0.547964 | 0.134123 | 4.085524 | 4.40E-05 | 0.001025 |
| NIP7     | 868.0237 | 0.523233 | 0.128104 | 4.084431 | 4.42E-05 | 0.001027 |
| OSBPL11  | 560.9682 | 0.646512 | 0.158439 | 4.080511 | 4.49E-05 | 0.001042 |
| PSMA3    | 1463.176 | 0.530469 | 0.130063 | 4.078557 | 4.53E-05 | 0.001049 |
| GNAL     | 103.3022 | 0.861326 | 0.211716 | 4.068311 | 4.74E-05 | 0.001089 |
| SUCLG1   | 1519.13  | 0.476102 | 0.117062 | 4.067094 | 4.76E-05 | 0.001091 |
| SUV39H2  | 697.601  | 0.609772 | 0.149935 | 4.066922 | 4.76E-05 | 0.001091 |
| RNU5A-1  | 58.44421 | 1.202262 | 0.29561  | 4.067053 | 4.76E-05 | 0.001091 |
| HNRNPA1  | 6675.304 | 0.438894 | 0.107927 | 4.066564 | 4.77E-05 | 0.001091 |
| SLC35G1  | 122.396  | 0.874797 | 0.215255 | 4.06401  | 4.82E-05 | 0.001102 |
| TRIM37   | 2090.643 | 0.516182 | 0.127082 | 4.061798 | 4.87E-05 | 0.00111  |
| TEX30    | 339.3209 | 0.640302 | 0.157855 | 4.056266 | 4.99E-05 | 0.001131 |
| MFSD14B  | 1469.618 | 0.457743 | 0.112895 | 4.054601 | 5.02E-05 | 0.001132 |
| sfmbt1   | 648.7294 | 0.551417 | 0.135996 | 4.054654 | 5.02E-05 | 0.001132 |
| AEN      | 498.9594 | 0.633787 | 0.156364 | 4.053286 | 5.05E-05 | 0.001136 |
| NAE1     | 2436.951 | 0.528342 | 0.130621 | 4.044846 | 5.24E-05 | 0.001173 |
| AASS     | 1266.609 | 0.481774 | 0.119202 | 4.041649 | 5.31E-05 | 0.001181 |
| RAVER2   | 896.2663 | 0.539717 | 0.133559 | 4.041028 | 5.32E-05 | 0.001182 |
| SNRNP40  | 1518.503 | 0.467341 | 0.115706 | 4.039045 | 5.37E-05 | 0.001185 |
| CDC42SE2 | 1490.085 | 0.505091 | 0.125028 | 4.03982  | 5.35E-05 | 0.001185 |
| RPF1     | 966.2458 | 0.532723 | 0.13188  | 4.039467 | 5.36E-05 | 0.001185 |
| LRRC17   | 176.4167 | 0.9347   | 0.231693 | 4.034213 | 5.48E-05 | 0.001206 |
| DSCC1    | 439.7489 | 0.859863 | 0.213201 | 4.033118 | 5.50E-05 | 0.00121  |
| XRCC5    | 14078.21 | 0.502653 | 0.124822 | 4.026945 | 5.65E-05 | 0.001238 |
| ACAT1    | 2031.962 | 0.516546 | 0.128292 | 4.02634  | 5.67E-05 | 0.001238 |
| TEX2     | 914.6268 | 0.490327 | 0.121839 | 4.024366 | 5.71E-05 | 0.001244 |
| RRM2     | 3147.234 | 0.551097 | 0.136961 | 4.023753 | 5.73E-05 | 0.001245 |
| HTATSF1  | 1825.912 | 0.462964 | 0.115272 | 4.016261 | 5.91E-05 | 0.001273 |
| hps5     | 1157.498 | 0.526709 | 0.131143 | 4.01631  | 5.91E-05 | 0.001273 |
| COX7B    | 3372.939 | 0.467032 | 0.116309 | 4.015447 | 5.93E-05 | 0.001274 |
| LMO4     | 1335.352 | 0.441357 | 0.110114 | 4.008199 | 6.12E-05 | 0.001306 |
| CPSF3    | 1323.699 | 0.515949 | 0.128826 | 4.00501  | 6.20E-05 | 0.001322 |
| DDX46    | 3224.55  | 0.554217 | 0.138392 | 4.004698 | 6.21E-05 | 0.001322 |
| UROS     | 546.8939 | 0.570734 | 0.142529 | 4.004329 | 6.22E-05 | 0.001322 |
| DLD      | 2302.178 | 0.565288 | 0.141189 | 4.00376  | 6.23E-05 | 0.001324 |
| GLO1     | 4664.534 | 0.4697   | 0.117326 | 4.003377 | 6.24E-05 | 0.001324 |
| TBC1D31  | 967.6874 | 0.549151 | 0.137264 | 4.000684 | 6.32E-05 | 0.001336 |
| TMEM126  | 904.132  | 0.529053 | 0.132549 | 3.991365 | 6.57E-05 | 0.001385 |
| CHUK     | 856.324  | 0.655334 | 0.164283 | 3.989057 | 6.63E-05 | 0.001395 |
| CLCN5    | 301.7194 | 0.6874   | 0.172394 | 3.987372 | 6.68E-05 | 0.001403 |

|           |          |          |          |          |          |          |
|-----------|----------|----------|----------|----------|----------|----------|
| ZW10      | 1084.753 | 0.549583 | 0.137969 | 3.983387 | 6.79E-05 | 0.001419 |
| TOE1      | 434.3269 | 0.606063 | 0.152135 | 3.983728 | 6.78E-05 | 0.001419 |
| DLAT      | 1980.932 | 0.484608 | 0.121685 | 3.982474 | 6.82E-05 | 0.001421 |
| USP39     | 1237.227 | 0.452906 | 0.113779 | 3.980566 | 6.88E-05 | 0.001426 |
| ING3      | 327.1714 | 0.598415 | 0.150367 | 3.979689 | 6.90E-05 | 0.00143  |
| ORC1      | 873.7576 | 0.54598  | 0.137263 | 3.977612 | 6.96E-05 | 0.00144  |
| PPID      | 952.1961 | 0.454574 | 0.114414 | 3.973059 | 7.10E-05 | 0.001463 |
| CENPU     | 763.9998 | 0.659898 | 0.1661   | 3.972904 | 7.10E-05 | 0.001463 |
| HNRNPA1I  | 2990.676 | 0.446192 | 0.112461 | 3.96752  | 7.26E-05 | 0.001489 |
| FANCD2    | 2012.584 | 0.566761 | 0.142889 | 3.966441 | 7.30E-05 | 0.001494 |
| MASTL     | 1452.618 | 0.513255 | 0.129441 | 3.965165 | 7.33E-05 | 0.001498 |
| SLC16A9   | 209.8081 | 0.722997 | 0.182525 | 3.961089 | 7.46E-05 | 0.00152  |
| NOL9      | 1296.021 | 0.492855 | 0.124481 | 3.959281 | 7.52E-05 | 0.001527 |
| LINC00578 | 17.26975 | 2.152065 | 0.543699 | 3.958192 | 7.55E-05 | 0.00153  |
| ETF1      | 5165.253 | 0.472522 | 0.119436 | 3.956265 | 7.61E-05 | 0.00154  |
| PIGX      | 1213.938 | 0.471257 | 0.119155 | 3.954997 | 7.65E-05 | 0.001543 |
| POLQ      | 2014.276 | 0.648023 | 0.163838 | 3.955274 | 7.64E-05 | 0.001543 |
| XPO5      | 2533.483 | 0.443224 | 0.112129 | 3.952797 | 7.72E-05 | 0.001555 |
| EIF4E     | 1505.389 | 0.553233 | 0.140185 | 3.946449 | 7.93E-05 | 0.001592 |
| KIAA1549  | 1295.595 | 0.448894 | 0.113774 | 3.945476 | 7.96E-05 | 0.001597 |
| SMC1A     | 3086.628 | 0.431741 | 0.109464 | 3.944134 | 8.01E-05 | 0.001597 |
| TRIB1     | 1106.425 | 0.613487 | 0.155522 | 3.944704 | 7.99E-05 | 0.001597 |
| NCAPH     | 1071.262 | 0.498791 | 0.12656  | 3.941153 | 8.11E-05 | 0.001613 |
| DIMT1     | 1018.171 | 0.524042 | 0.13323  | 3.933354 | 8.38E-05 | 0.001656 |
| ERCC4     | 768.8277 | 0.544246 | 0.138396 | 3.932535 | 8.41E-05 | 0.001659 |
| GCLM      | 10047.48 | 0.472594 | 0.120285 | 3.928953 | 8.53E-05 | 0.00168  |
| RUVBL1    | 1823.89  | 0.433197 | 0.110275 | 3.928342 | 8.55E-05 | 0.001682 |
| BRIP1     | 1456.197 | 0.731897 | 0.186341 | 3.927724 | 8.58E-05 | 0.001684 |
| HOMER1    | 641.2216 | 0.612116 | 0.155893 | 3.926508 | 8.62E-05 | 0.001691 |
| GCSHP5    | 1005.449 | 0.560766 | 0.143029 | 3.920633 | 8.83E-05 | 0.001728 |
| RMI2      | 493.9503 | 0.638576 | 0.1629   | 3.920058 | 8.85E-05 | 0.00173  |
| SLC1A3    | 120.2188 | 0.819034 | 0.208954 | 3.91969  | 8.87E-05 | 0.00173  |
| CEBPG     | 1470.889 | 0.531159 | 0.135577 | 3.917765 | 8.94E-05 | 0.00174  |
| AFG3L2    | 1996.287 | 0.413744 | 0.10576  | 3.912111 | 9.15E-05 | 0.001774 |
| NUP205    | 4961.427 | 0.502995 | 0.128622 | 3.910638 | 9.21E-05 | 0.00178  |
| LBR       | 3623.932 | 0.505126 | 0.129161 | 3.910813 | 9.20E-05 | 0.00178  |
| PSMD6     | 1482.09  | 0.555887 | 0.142156 | 3.9104   | 9.21E-05 | 0.00178  |
| SLC20A1   | 4402.934 | 0.500116 | 0.127964 | 3.90826  | 9.30E-05 | 0.001793 |
| SSB       | 2191.4   | 0.48363  | 0.123876 | 3.904151 | 9.46E-05 | 0.001818 |
| HACD3     | 4309.857 | 0.445939 | 0.114345 | 3.899943 | 9.62E-05 | 0.001838 |
| BCCIP     | 1226.81  | 0.508611 | 0.130402 | 3.900325 | 9.61E-05 | 0.001838 |
| TRAPPC13  | 806.0683 | 0.556385 | 0.142716 | 3.898542 | 9.68E-05 | 0.001847 |
| STMN1     | 6331.67  | 0.484297 | 0.124378 | 3.893751 | 9.87E-05 | 0.001881 |
| CMPK2     | 28.53795 | 1.496685 | 0.38442  | 3.893362 | 9.89E-05 | 0.001882 |
| TSEN2     | 426.4061 | 0.609458 | 0.156567 | 3.892629 | 9.92E-05 | 0.001885 |
| ICMT      | 1943.712 | 0.496289 | 0.127507 | 3.892248 | 9.93E-05 | 0.001886 |
| TTC19     | 1311.79  | 0.463741 | 0.119233 | 3.889355 | 0.000101 | 0.001905 |



|           |          |          |          |          |          |          |
|-----------|----------|----------|----------|----------|----------|----------|
| SSX2IP    | 1230.359 | 0.588899 | 0.151455 | 3.888284 | 0.000101 | 0.001908 |
| GDF15     | 116.6666 | 1.110381 | 0.285567 | 3.888336 | 0.000101 | 0.001908 |
| UTP11     | 928.654  | 0.551612 | 0.141978 | 3.8852   | 0.000102 | 0.001918 |
| HIST1H2BF | 472.4111 | 0.744499 | 0.191663 | 3.884409 | 0.000103 | 0.001922 |
| CNOT10    | 742.5002 | 0.58305  | 0.150285 | 3.879633 | 0.000105 | 0.001957 |
| CHORDC1   | 1738.637 | 0.583358 | 0.150389 | 3.878983 | 0.000105 | 0.00196  |
| DEK       | 8525.348 | 0.506729 | 0.130692 | 3.877263 | 0.000106 | 0.001972 |
| TRIM24    | 990.9149 | 0.462551 | 0.119444 | 3.872533 | 0.000108 | 0.002003 |
| NUDT11    | 360.0376 | 0.579402 | 0.149699 | 3.870441 | 0.000109 | 0.002018 |
| SLF1      | 968.0941 | 0.633146 | 0.163691 | 3.867925 | 0.00011  | 0.002037 |
| ZNF85     | 247.53   | 0.772093 | 0.199647 | 3.867285 | 0.00011  | 0.002038 |
| TMEM132   | 1768.917 | 0.51636  | 0.13364  | 3.863817 | 0.000112 | 0.002062 |
| ARMT1     | 595.8659 | 0.527711 | 0.136652 | 3.861707 | 0.000113 | 0.002074 |
| PPIL1     | 963.2751 | 0.480805 | 0.124534 | 3.860834 | 0.000113 | 0.002079 |
| MTBP      | 649.4008 | 0.645289 | 0.167166 | 3.860163 | 0.000113 | 0.00208  |
| MRPL3     | 1845.603 | 0.466671 | 0.121086 | 3.854041 | 0.000116 | 0.002125 |
| DIRC2     | 377.6903 | 0.541795 | 0.140579 | 3.854034 | 0.000116 | 0.002125 |
| ADAMTS5   | 486.8542 | 0.574763 | 0.149118 | 3.854414 | 0.000116 | 0.002125 |
| SNRPG     | 813.4159 | 0.493307 | 0.128041 | 3.852711 | 0.000117 | 0.002134 |
| APIP      | 793.9604 | 0.509965 | 0.132381 | 3.852239 | 0.000117 | 0.002136 |
| XPR1      | 1520.371 | 0.426183 | 0.110794 | 3.846626 | 0.00012  | 0.00218  |
| ZBTB8OS   | 431.0452 | 0.586222 | 0.152387 | 3.846921 | 0.00012  | 0.00218  |
| CAP2      | 2452.61  | 0.396364 | 0.103082 | 3.845118 | 0.00012  | 0.002188 |
| NET1      | 1212.83  | 0.48605  | 0.12649  | 3.842612 | 0.000122 | 0.002208 |
| AMD1      | 2011.632 | 0.575392 | 0.149807 | 3.840889 | 0.000123 | 0.002221 |
| GTPBP10   | 818.1963 | 0.565671 | 0.147307 | 3.840092 | 0.000123 | 0.002226 |
| BZW2      | 2753.562 | 0.428027 | 0.111471 | 3.83979  | 0.000123 | 0.002226 |
| TIMELESS  | 876.8067 | 0.598974 | 0.156184 | 3.835047 | 0.000126 | 0.002261 |
| CYP4V2    | 190.341  | 0.749303 | 0.19537  | 3.835308 | 0.000125 | 0.002261 |
| BAZ1B     | 6154.885 | 0.479049 | 0.124987 | 3.832779 | 0.000127 | 0.002274 |
| TIAM1     | 495.6346 | 0.559402 | 0.146055 | 3.83008  | 0.000128 | 0.002291 |
| LARS      | 7870.08  | 0.459143 | 0.119905 | 3.829227 | 0.000129 | 0.002297 |
| SIPA1L2   | 1086.972 | 0.506506 | 0.13233  | 3.827586 | 0.000129 | 0.002304 |
| ZMPSTE24  | 1255.687 | 0.572712 | 0.149616 | 3.827869 | 0.000129 | 0.002304 |
| BRCA1     | 2591.788 | 0.664928 | 0.173709 | 3.827825 | 0.000129 | 0.002304 |
| SUB1      | 3544.032 | 0.471002 | 0.123084 | 3.826663 | 0.00013  | 0.00231  |
| MTERF3    | 612.8497 | 0.563592 | 0.147359 | 3.824614 | 0.000131 | 0.002327 |
| NUDT15    | 943.9505 | 0.455071 | 0.119168 | 3.818754 | 0.000134 | 0.002374 |
| ABCF2     | 2170.512 | 0.442446 | 0.115978 | 3.814927 | 0.000136 | 0.002403 |
| IPO7      | 9377.5   | 0.488677 | 0.128171 | 3.812709 | 0.000137 | 0.002403 |
| BTF3L4    | 963.2007 | 0.518736 | 0.136046 | 3.812949 | 0.000137 | 0.002403 |
| DDX21     | 4053.873 | 0.536543 | 0.140655 | 3.814597 | 0.000136 | 0.002403 |
| mthfd2    | 4229.402 | 0.556894 | 0.146013 | 3.814007 | 0.000137 | 0.002403 |
| rnf219    | 1096.793 | 0.557516 | 0.14618  | 3.813889 | 0.000137 | 0.002403 |
| NUP107    | 2100.943 | 0.552806 | 0.145073 | 3.810538 | 0.000139 | 0.002421 |
| SLC25A33  | 158.6007 | 0.729949 | 0.191661 | 3.808536 | 0.00014  | 0.002438 |
| ORC5      | 440.8143 | 0.604349 | 0.158724 | 3.80755  | 0.00014  | 0.002445 |

|          |          |          |          |          |          |          |
|----------|----------|----------|----------|----------|----------|----------|
| MRPL15   | 718.7493 | 0.537074 | 0.141156 | 3.804822 | 0.000142 | 0.002464 |
| CASP3    | 1005.197 | 0.484771 | 0.12747  | 3.803016 | 0.000143 | 0.002473 |
| GTF2A2   | 775.9075 | 0.512593 | 0.134792 | 3.802834 | 0.000143 | 0.002473 |
| GSTCD    | 357.7584 | 0.706297 | 0.185712 | 3.803176 | 0.000143 | 0.002473 |
| ATP5B    | 13294.35 | 0.364615 | 0.095918 | 3.801327 | 0.000144 | 0.002484 |
| DNM1L    | 2855.085 | 0.481266 | 0.126627 | 3.800649 | 0.000144 | 0.002484 |
| CCDC102B | 221.7157 | 0.965642 | 0.25407  | 3.800698 | 0.000144 | 0.002484 |
| DOCK4    | 59.73658 | 1.19367  | 0.314062 | 3.80075  | 0.000144 | 0.002484 |
| HAT1     | 1862.922 | 0.583163 | 0.15369  | 3.794411 | 0.000148 | 0.002536 |
| GLRX2    | 295.3172 | 0.692677 | 0.182619 | 3.793023 | 0.000149 | 0.002547 |
| SNX4     | 1089.942 | 0.455721 | 0.120206 | 3.791163 | 0.00015  | 0.00256  |
| HNMT     | 218.4085 | 0.639957 | 0.168791 | 3.791422 | 0.00015  | 0.00256  |
| SEPHS1   | 1249.559 | 0.425295 | 0.112239 | 3.789189 | 0.000151 | 0.00257  |
| NCBP1    | 1986.723 | 0.519241 | 0.137019 | 3.789556 | 0.000151 | 0.00257  |
| AKR1B10  | 51283.14 | 0.761934 | 0.2012   | 3.786957 | 0.000153 | 0.002584 |
| PLK4     | 1029.165 | 0.58843  | 0.155581 | 3.782143 | 0.000155 | 0.002629 |
| COG2     | 672.4742 | 0.484045 | 0.128115 | 3.778217 | 0.000158 | 0.002659 |
| Snord43  | 41.85579 | 1.284923 | 0.34017  | 3.777294 | 0.000159 | 0.002666 |
| POLR1B   | 967.1765 | 0.506532 | 0.134124 | 3.776603 | 0.000159 | 0.002671 |
| c12orf4  | 546.0916 | 0.604059 | 0.160214 | 3.770321 | 0.000163 | 0.002732 |
| SAAL1    | 625.1794 | 0.618555 | 0.164062 | 3.770263 | 0.000163 | 0.002732 |
| FAM210B  | 1232.934 | 0.425422 | 0.112859 | 3.769486 | 0.000164 | 0.002736 |
| GPR3     | 36.80382 | 1.29053  | 0.342589 | 3.766989 | 0.000165 | 0.002754 |
| RABEP1   | 3170.98  | 0.481674 | 0.128047 | 3.761691 | 0.000169 | 0.00281  |
| NDUFS1   | 3178.421 | 0.405784 | 0.107905 | 3.760559 | 0.00017  | 0.00282  |
| GTF2E1   | 830.1625 | 0.471097 | 0.125282 | 3.76029  | 0.00017  | 0.00282  |
| UTP14A   | 662.9279 | 0.5481   | 0.145818 | 3.758802 | 0.000171 | 0.002831 |
| RANBP6   | 1190.617 | 0.509841 | 0.135666 | 3.758074 | 0.000171 | 0.002836 |
| RGS2     | 366.8852 | 0.760325 | 0.20249  | 3.754876 | 0.000173 | 0.002869 |
| ercc6l   | 864.5571 | 0.643855 | 0.171513 | 3.75398  | 0.000174 | 0.002877 |
| ZNF738   | 521.4911 | 0.544724 | 0.145166 | 3.752424 | 0.000175 | 0.002891 |
| PDE12    | 584.9871 | 0.493098 | 0.13147  | 3.750647 | 0.000176 | 0.002906 |
| STK38L   | 215.3709 | 0.637769 | 0.170031 | 3.75091  | 0.000176 | 0.002906 |
| TP53RK   | 632.4869 | 0.561519 | 0.149746 | 3.749816 | 0.000177 | 0.002912 |
| FASTKD5  | 795.366  | 0.550286 | 0.146826 | 3.74787  | 0.000178 | 0.002929 |
| RTN4IP1  | 225.8187 | 0.65869  | 0.175747 | 3.747947 | 0.000178 | 0.002929 |
| HMGB2    | 5380.519 | 0.400782 | 0.107048 | 3.743955 | 0.000181 | 0.002966 |
| RNU5E-1  | 87.31691 | 0.934207 | 0.249658 | 3.741949 | 0.000183 | 0.002983 |
| LYSMD2   | 194.8701 | 0.677707 | 0.181191 | 3.740288 | 0.000184 | 0.002996 |
| DIS3L    | 1066.93  | 0.429909 | 0.115074 | 3.735939 | 0.000187 | 0.003033 |
| COPRS    | 1370.644 | 0.44598  | 0.119369 | 3.736144 | 0.000187 | 0.003033 |
| ASF1A    | 772.9978 | 0.50082  | 0.134076 | 3.735358 | 0.000187 | 0.003036 |
| PRMT6    | 200.4872 | 0.734891 | 0.196872 | 3.732833 | 0.000189 | 0.003057 |
| CISD2    | 813.2818 | 0.48457  | 0.129894 | 3.730513 | 0.000191 | 0.003082 |
| MAK16    | 1287.228 | 0.53356  | 0.143044 | 3.730028 | 0.000191 | 0.003085 |
| GSKIP    | 241.8414 | 0.671548 | 0.180112 | 3.728497 | 0.000193 | 0.003101 |
| BRD7     | 1439.984 | 0.436586 | 0.117234 | 3.724058 | 0.000196 | 0.003146 |

|          |          |          |          |          |          |          |
|----------|----------|----------|----------|----------|----------|----------|
| STIM2    | 321.7365 | 0.555381 | 0.149155 | 3.723504 | 0.000196 | 0.00315  |
| CHRNA5   | 161.834  | 0.876844 | 0.235569 | 3.722241 | 0.000197 | 0.003162 |
| MBNL3    | 430.6052 | 0.653609 | 0.175735 | 3.719291 | 0.0002   | 0.003193 |
| CTSC     | 447.2407 | 0.509436 | 0.137069 | 3.716637 | 0.000202 | 0.003216 |
| HIGD1A   | 1711.897 | 0.552432 | 0.148633 | 3.716739 | 0.000202 | 0.003216 |
| ZNF30    | 122.1347 | 0.82269  | 0.221507 | 3.714054 | 0.000204 | 0.003246 |
| SOCS4    | 1152.401 | 0.476538 | 0.128345 | 3.712951 | 0.000205 | 0.003253 |
| CTDSPL   | 884.0377 | 0.459406 | 0.123856 | 3.709205 | 0.000208 | 0.003285 |
| KLHL5    | 2438.193 | 0.475273 | 0.128178 | 3.707902 | 0.000209 | 0.003292 |
| STXBP4   | 609.6426 | 0.626382 | 0.168932 | 3.707897 | 0.000209 | 0.003292 |
| PDCL3    | 195.67   | 0.626181 | 0.169032 | 3.704521 | 0.000212 | 0.003326 |
| ARHGEF26 | 148.4881 | 0.769853 | 0.208222 | 3.69727  | 0.000218 | 0.003415 |
| ACTL6A   | 1735.157 | 0.476705 | 0.128984 | 3.695842 | 0.000219 | 0.003428 |
| SNORD16  | 32.92411 | 1.469919 | 0.397946 | 3.693764 | 0.000221 | 0.003452 |
| CDC123   | 1154.569 | 0.434525 | 0.117711 | 3.691463 | 0.000223 | 0.00348  |
| SPAST    | 773.7243 | 0.508002 | 0.13785  | 3.685167 | 0.000229 | 0.003549 |
| B3GALNT2 | 1366.724 | 0.444345 | 0.120659 | 3.682641 | 0.000231 | 0.003581 |
| c20orf24 | 2411.384 | 0.417214 | 0.113349 | 3.68078  | 0.000233 | 0.0036   |
| ATG3     | 1457.018 | 0.479231 | 0.130266 | 3.678869 | 0.000234 | 0.003621 |
| ADAT2    | 271.2931 | 0.638419 | 0.173544 | 3.678718 | 0.000234 | 0.003621 |
| FBXO33   | 431.5527 | 0.531368 | 0.144778 | 3.670235 | 0.000242 | 0.003722 |
| EXOSC9   | 963.0285 | 0.471903 | 0.128621 | 3.668948 | 0.000244 | 0.003735 |
| RAD51AP1 | 1039.464 | 0.518092 | 0.141299 | 3.66663  | 0.000246 | 0.003756 |
| c1orf112 | 615.2451 | 0.639973 | 0.174604 | 3.665272 | 0.000247 | 0.003769 |
| PPHLN1   | 1223.52  | 0.435212 | 0.118749 | 3.664976 | 0.000247 | 0.00377  |
| QRSL1    | 442.9442 | 0.545894 | 0.14906  | 3.662242 | 0.00025  | 0.003798 |
| CCL2     | 83.41843 | 1.201142 | 0.328    | 3.662022 | 0.00025  | 0.003798 |
| CCNB1    | 5534.546 | 0.436342 | 0.119168 | 3.66158  | 0.000251 | 0.003801 |
| GFM1     | 2365.84  | 0.479121 | 0.130869 | 3.661081 | 0.000251 | 0.003802 |
| RAN      | 5721.13  | 0.41791  | 0.11426  | 3.657543 | 0.000255 | 0.003835 |
| ATP5G3   | 4961.468 | 0.424905 | 0.116141 | 3.65854  | 0.000254 | 0.003835 |
| MSH6     | 4371.719 | 0.448915 | 0.122778 | 3.656319 | 0.000256 | 0.003846 |
| RRP15    | 942.7572 | 0.540555 | 0.147877 | 3.655433 | 0.000257 | 0.003855 |
| NAA15    | 3064.378 | 0.550611 | 0.150714 | 3.65336  | 0.000259 | 0.003879 |
| FAM173B  | 447.0431 | 0.564174 | 0.154571 | 3.649927 | 0.000262 | 0.00392  |
| SENP1    | 897.6435 | 0.489219 | 0.134232 | 3.644594 | 0.000268 | 0.003991 |
| TXNL1    | 1018.786 | 0.506254 | 0.13894  | 3.643693 | 0.000269 | 0.004001 |
| SPC25    | 295.0452 | 0.74899  | 0.20559  | 3.643117 | 0.000269 | 0.004002 |
| SAE1     | 3603.927 | 0.397451 | 0.109268 | 3.637387 | 0.000275 | 0.004072 |
| ELAVL2   | 213.27   | 0.75813  | 0.208558 | 3.635108 | 0.000278 | 0.004101 |
| SMC3     | 2848.714 | 0.532898 | 0.146675 | 3.633197 | 0.00028  | 0.004119 |
| ZNF252P  | 914.1692 | 0.447665 | 0.123247 | 3.63225  | 0.000281 | 0.004127 |
| CPSF2    | 2072.422 | 0.501001 | 0.138034 | 3.62955  | 0.000284 | 0.004162 |
| ZCCHC10  | 537.0702 | 0.524922 | 0.144754 | 3.626313 | 0.000287 | 0.004207 |
| ELAC1    | 59.34989 | 1.103921 | 0.304441 | 3.62606  | 0.000288 | 0.004207 |
| UBE2T    | 1211.537 | 0.487306 | 0.134465 | 3.62403  | 0.00029  | 0.004228 |
| ACSL5    | 570.6892 | 0.49156  | 0.135787 | 3.620072 | 0.000295 | 0.004281 |

|          |          |          |          |          |          |          |
|----------|----------|----------|----------|----------|----------|----------|
| CHST10   | 199.3341 | 0.677301 | 0.187084 | 3.620301 | 0.000294 | 0.004281 |
| LOC90784 | 223.2018 | 0.643616 | 0.177984 | 3.616147 | 0.000299 | 0.004342 |
| TMX3     | 3198.748 | 0.427311 | 0.118361 | 3.610233 | 0.000306 | 0.004429 |
| CPNE8    | 404.4346 | 0.581842 | 0.16122  | 3.608989 | 0.000307 | 0.004443 |
| RBMXL1   | 1205.424 | 0.49093  | 0.136057 | 3.608266 | 0.000308 | 0.004451 |
| Cox5a    | 1768.112 | 0.426559 | 0.118316 | 3.605243 | 0.000312 | 0.004482 |
| CIAPIN1  | 1164.556 | 0.413869 | 0.114854 | 3.603451 | 0.000314 | 0.004501 |
| ZC3H14   | 1449.629 | 0.440047 | 0.122144 | 3.6027   | 0.000315 | 0.00451  |
| CHAF1B   | 800.3204 | 0.51908  | 0.144264 | 3.598128 | 0.000321 | 0.004569 |
| SPAG1    | 155.993  | 0.84259  | 0.234322 | 3.595869 | 0.000323 | 0.004596 |
| FRG1     | 378.168  | 0.55678  | 0.154915 | 3.59409  | 0.000326 | 0.004613 |
| CCDC138  | 303.6673 | 0.632194 | 0.175987 | 3.59227  | 0.000328 | 0.004634 |
| FARSB    | 2300.686 | 0.509655 | 0.14192  | 3.591148 | 0.000329 | 0.004646 |
| VMA21    | 4186.901 | 0.392581 | 0.109347 | 3.590227 | 0.00033  | 0.004658 |
| ANKFN1   | 12.7722  | 2.719809 | 0.757717 | 3.58948  | 0.000331 | 0.004667 |
| NDFIP2   | 803.5387 | 0.443903 | 0.123719 | 3.588003 | 0.000333 | 0.004687 |
| ATP5J    | 1305.971 | 0.43045  | 0.120024 | 3.586365 | 0.000335 | 0.004708 |
| TTF2     | 1952.751 | 0.511057 | 0.142515 | 3.585998 | 0.000336 | 0.004708 |
| Snora81  | 185.4001 | 0.790518 | 0.22053  | 3.584622 | 0.000338 | 0.004728 |
| EXOG     | 210.0885 | 0.775403 | 0.216431 | 3.582681 | 0.00034  | 0.004747 |
| GTF2IP4  | 8046.731 | 0.389926 | 0.108878 | 3.581306 | 0.000342 | 0.004767 |
| MRPL35   | 1006.731 | 0.480751 | 0.134286 | 3.580046 | 0.000344 | 0.004786 |
| DUSP4    | 731.018  | 0.57564  | 0.160839 | 3.57899  | 0.000345 | 0.004801 |
| ABHD13   | 575.1228 | 0.510548 | 0.14275  | 3.576525 | 0.000348 | 0.004833 |
| ZNF669   | 223.3972 | 0.632829 | 0.17695  | 3.576321 | 0.000348 | 0.004833 |
| SEH1L    | 988.0141 | 0.479772 | 0.134248 | 3.573775 | 0.000352 | 0.004867 |
| STK39    | 807.4347 | 0.497483 | 0.139399 | 3.568764 | 0.000359 | 0.004944 |
| RRM1     | 5850.12  | 0.46215  | 0.129514 | 3.568337 | 0.000359 | 0.004944 |
| CDK1     | 3649.116 | 0.43369  | 0.121561 | 3.567688 | 0.00036  | 0.004949 |
| CCDC34   | 461.9234 | 0.519731 | 0.145685 | 3.567501 | 0.00036  | 0.004949 |
| TRPA1    | 467.3042 | 0.577244 | 0.161815 | 3.567311 | 0.000361 | 0.004949 |
| CROT     | 1777.819 | 0.409941 | 0.114971 | 3.565591 | 0.000363 | 0.004963 |
| plrg1    | 1630.53  | 0.449487 | 0.126041 | 3.566185 | 0.000362 | 0.004963 |
| UBE2N    | 1733.802 | 0.430381 | 0.120747 | 3.564326 | 0.000365 | 0.004979 |
| GIN54    | 599.0055 | 0.617944 | 0.173386 | 3.563983 | 0.000365 | 0.004981 |
| MED21    | 829.3306 | 0.502272 | 0.141028 | 3.561499 | 0.000369 | 0.00502  |
| NQO1     | 77609.35 | 0.428621 | 0.120379 | 3.560602 | 0.00037  | 0.005021 |
| BLMH     | 1451.434 | 0.459425 | 0.129023 | 3.560796 | 0.00037  | 0.005021 |
| B4GALT6  | 454.584  | 0.572762 | 0.160869 | 3.560428 | 0.00037  | 0.005021 |
| MARS     | 3171.7   | 0.517603 | 0.145457 | 3.558454 | 0.000373 | 0.005051 |
| PTDSS1   | 3296.534 | 0.363077 | 0.102118 | 3.555466 | 0.000377 | 0.005103 |
| SKP2     | 1397.666 | 0.436358 | 0.122742 | 3.555084 | 0.000378 | 0.005103 |
| GTF2IP1  | 7799.764 | 0.389536 | 0.109593 | 3.554405 | 0.000379 | 0.005112 |
| PLAA     | 1234.086 | 0.561536 | 0.158109 | 3.551575 | 0.000383 | 0.005158 |
| CDKN3    | 713.3214 | 0.503413 | 0.141897 | 3.547734 | 0.000389 | 0.005225 |
| GTF2H1   | 1490.225 | 0.4056   | 0.114341 | 3.547289 | 0.000389 | 0.005229 |
| ARL13B   | 479.6257 | 0.590848 | 0.166634 | 3.545796 | 0.000391 | 0.005245 |

|           |          |          |          |          |          |          |
|-----------|----------|----------|----------|----------|----------|----------|
| PIK3R4    | 1482.259 | 0.394466 | 0.111291 | 3.54446  | 0.000393 | 0.005263 |
| CHAMP1    | 548.7395 | 0.537107 | 0.151613 | 3.542622 | 0.000396 | 0.005295 |
| LOC100121 | 148.498  | 0.706413 | 0.199499 | 3.540931 | 0.000399 | 0.005324 |
| RBBP7     | 4637.963 | 0.375015 | 0.105944 | 3.539744 | 0.000401 | 0.005344 |
| CCT4      | 5619.428 | 0.442442 | 0.125003 | 3.539455 | 0.000401 | 0.005345 |
| IARS      | 10212.64 | 0.405898 | 0.114737 | 3.537649 | 0.000404 | 0.005368 |
| PDCD5     | 846.5311 | 0.505109 | 0.142835 | 3.536314 | 0.000406 | 0.005386 |
| NDUFA4    | 2384.452 | 0.415431 | 0.117654 | 3.530948 | 0.000414 | 0.005468 |
| ZNF730    | 248.5153 | 0.666694 | 0.188814 | 3.53096  | 0.000414 | 0.005468 |
| BAG2      | 1146.721 | 0.529467 | 0.149981 | 3.530221 | 0.000415 | 0.005474 |
| dsn1      | 1707.632 | 0.42323  | 0.120021 | 3.526307 | 0.000421 | 0.005549 |
| PAFAH1B2  | 4851.881 | 0.370734 | 0.105231 | 3.523066 | 0.000427 | 0.005581 |
| Hist1h1d  | 3751.463 | 0.462921 | 0.131398 | 3.523042 | 0.000427 | 0.005581 |
| DOCK11    | 864.4166 | 0.5028   | 0.142673 | 3.524133 | 0.000425 | 0.005581 |
| PDIK1L    | 480.4262 | 0.5576   | 0.158251 | 3.523514 | 0.000426 | 0.005581 |
| ACADM     | 1638.111 | 0.485375 | 0.137828 | 3.52161  | 0.000429 | 0.005597 |
| AAGAB     | 1423.485 | 0.519479 | 0.14754  | 3.520943 | 0.00043  | 0.005607 |
| PSPH      | 893.1869 | 0.427053 | 0.121363 | 3.51881  | 0.000433 | 0.005638 |
| HUNK      | 204.1063 | 0.646662 | 0.183803 | 3.518228 | 0.000434 | 0.00564  |
| GTPBP4    | 1766.334 | 0.430765 | 0.122459 | 3.517624 | 0.000435 | 0.005648 |
| KIF15     | 1816.868 | 0.503981 | 0.143291 | 3.517174 | 0.000436 | 0.005653 |
| PKP4      | 1573.891 | 0.393222 | 0.111884 | 3.514554 | 0.00044  | 0.005705 |
| SRSF2     | 4370.208 | 0.394981 | 0.112412 | 3.513679 | 0.000442 | 0.005714 |
| WDR35     | 656.8199 | 0.510113 | 0.1454   | 3.508349 | 0.000451 | 0.005815 |
| TRMT6     | 636.1092 | 0.484954 | 0.138302 | 3.50648  | 0.000454 | 0.005846 |
| ZNF326    | 523.1867 | 0.623094 | 0.177945 | 3.501605 | 0.000462 | 0.005934 |
| WDR70     | 1025.508 | 0.429157 | 0.122625 | 3.499753 | 0.000466 | 0.005966 |
| ETFA      | 3873.751 | 0.408998 | 0.116931 | 3.497784 | 0.000469 | 0.005995 |
| CHEK2     | 673.4204 | 0.449154 | 0.128409 | 3.497845 | 0.000469 | 0.005995 |
| SASS6     | 744.3194 | 0.543461 | 0.155359 | 3.498105 | 0.000469 | 0.005995 |
| GCSH      | 578.3818 | 0.574692 | 0.164411 | 3.495468 | 0.000473 | 0.006042 |
| KIAA0101  | 974.3278 | 0.543169 | 0.155424 | 3.494751 | 0.000475 | 0.006054 |
| STRBP     | 780.1367 | 0.509012 | 0.145671 | 3.494263 | 0.000475 | 0.00606  |
| ZGRF1     | 1327.58  | 0.544165 | 0.155779 | 3.493182 | 0.000477 | 0.006076 |
| CDC14A    | 199.0673 | 0.62522  | 0.17908  | 3.491277 | 0.000481 | 0.006108 |
| RNU5D-1   | 35.04098 | 1.207732 | 0.345959 | 3.490965 | 0.000481 | 0.00611  |
| MLH1      | 1145.98  | 0.450905 | 0.129184 | 3.490409 | 0.000482 | 0.006117 |
| MIER3     | 1427.079 | 0.501572 | 0.143774 | 3.488627 | 0.000486 | 0.006148 |
| GTF3C3    | 1312.291 | 0.415389 | 0.119103 | 3.487641 | 0.000487 | 0.006166 |
| NUP88     | 1617.367 | 0.446467 | 0.128064 | 3.486293 | 0.00049  | 0.006187 |
| RNF138    | 855.7151 | 0.558704 | 0.160371 | 3.483824 | 0.000494 | 0.006239 |
| TATDN3    | 330.7532 | 0.518338 | 0.1489   | 3.481116 | 0.000499 | 0.006292 |
| RNF14     | 1541.742 | 0.394255 | 0.113296 | 3.479856 | 0.000502 | 0.006313 |
| SESN1     | 106.0525 | 0.759539 | 0.218272 | 3.479786 | 0.000502 | 0.006313 |
| RNGTT     | 1301.784 | 0.436163 | 0.125387 | 3.478542 | 0.000504 | 0.006338 |
| LEPROTL1  | 1165.919 | 0.472696 | 0.136041 | 3.474655 | 0.000512 | 0.006404 |
| FXN       | 223.9661 | 0.70014  | 0.2016   | 3.472916 | 0.000515 | 0.00643  |

|          |          |          |          |          |          |          |
|----------|----------|----------|----------|----------|----------|----------|
| ID4      | 122.6555 | 0.789064 | 0.227275 | 3.471841 | 0.000517 | 0.006445 |
| DCAF13   | 2463.904 | 0.441288 | 0.127141 | 3.470842 | 0.000519 | 0.006464 |
| KIAA1524 | 1587.977 | 0.621405 | 0.179118 | 3.469251 | 0.000522 | 0.006497 |
| abcb10   | 1104.852 | 0.425419 | 0.122646 | 3.468671 | 0.000523 | 0.006506 |
| RFC5     | 860.1237 | 0.459878 | 0.132753 | 3.464164 | 0.000532 | 0.0066   |
| FZD7     | 1752.889 | 0.411711 | 0.118974 | 3.460513 | 0.000539 | 0.006674 |
| ZDHC13   | 462.5677 | 0.597314 | 0.172672 | 3.459247 | 0.000542 | 0.0067   |
| YARS     | 3574.516 | 0.433192 | 0.125278 | 3.457846 | 0.000545 | 0.00673  |
| FBXO5    | 1119.783 | 0.508314 | 0.147069 | 3.456289 | 0.000548 | 0.006763 |
| RMND5A   | 1992.065 | 0.401088 | 0.116059 | 3.455881 | 0.000548 | 0.006768 |
| DCK      | 799.5094 | 0.462878 | 0.134068 | 3.452551 | 0.000555 | 0.006841 |
| SNTB2    | 4451.198 | 0.394215 | 0.114247 | 3.45056  | 0.000559 | 0.006885 |
| TDO2     | 63.93182 | 0.926582 | 0.268542 | 3.450417 | 0.00056  | 0.006885 |
| TOPBP1   | 3161.201 | 0.451155 | 0.130774 | 3.449876 | 0.000561 | 0.006891 |
| MRPL13   | 770.3451 | 0.451242 | 0.130875 | 3.447881 | 0.000565 | 0.006911 |
| CCDC59   | 491.6627 | 0.464491 | 0.13471  | 3.448085 | 0.000565 | 0.006911 |
| PLAU     | 809.1147 | 0.616506 | 0.178916 | 3.445792 | 0.000569 | 0.006954 |
| EPHA1    | 41.74774 | 1.144906 | 0.332371 | 3.444663 | 0.000572 | 0.006977 |
| YTHDF2   | 2329.594 | 0.37659  | 0.10934  | 3.444227 | 0.000573 | 0.006983 |
| NBN      | 2090.523 | 0.471714 | 0.137049 | 3.441927 | 0.000578 | 0.007032 |
| CALCRL   | 101.6136 | 1.352881 | 0.393092 | 3.441639 | 0.000578 | 0.007034 |
| DUT      | 1528.442 | 0.398433 | 0.11583  | 3.439818 | 0.000582 | 0.007059 |
| CCNA2    | 3001.653 | 0.481156 | 0.140056 | 3.435455 | 0.000592 | 0.007162 |
| DENR     | 1467.322 | 0.480487 | 0.13991  | 3.434267 | 0.000594 | 0.007188 |
| 43711    | 392.2552 | 0.48002  | 0.139834 | 3.432789 | 0.000597 | 0.007222 |
| HAUS1    | 582.6188 | 0.537403 | 0.156587 | 3.431978 | 0.000599 | 0.007238 |
| DYNC1LI1 | 1184.606 | 0.407071 | 0.118698 | 3.429477 | 0.000605 | 0.007282 |
| PA2G4P4  | 398.8599 | 0.505316 | 0.147343 | 3.42953  | 0.000605 | 0.007282 |
| ABCC5    | 809.6216 | 0.437329 | 0.127601 | 3.427308 | 0.00061  | 0.007316 |
| DNMT1    | 2833.817 | 0.44771  | 0.130636 | 3.427169 | 0.00061  | 0.007316 |
| PA2G4    | 2505.939 | 0.372631 | 0.108747 | 3.426587 | 0.000611 | 0.007326 |
| STAT1    | 3299.878 | 0.363668 | 0.106165 | 3.425489 | 0.000614 | 0.007339 |
| CALM2    | 11865.07 | 0.399316 | 0.116576 | 3.425382 | 0.000614 | 0.007339 |
| CENPL    | 485.5919 | 0.490522 | 0.143196 | 3.425518 | 0.000614 | 0.007339 |
| CENPK    | 1161.468 | 0.592075 | 0.172855 | 3.425263 | 0.000614 | 0.007339 |
| WDYHV1   | 411.1013 | 0.487051 | 0.142274 | 3.423337 | 0.000619 | 0.007368 |
| ARG2     | 273.663  | 0.549504 | 0.16065  | 3.420496 | 0.000625 | 0.00744  |
| VBP1     | 1965.458 | 0.433723 | 0.126949 | 3.416507 | 0.000634 | 0.007544 |
| ATP1B3   | 2210.354 | 0.397039 | 0.116309 | 3.413663 | 0.000641 | 0.007611 |
| VRK2     | 497.6011 | 0.53587  | 0.157134 | 3.410285 | 0.000649 | 0.0077   |
| MNS1     | 121.6232 | 0.830716 | 0.243682 | 3.409019 | 0.000652 | 0.00773  |
| RAD54L   | 855.6074 | 0.452266 | 0.132756 | 3.406742 | 0.000657 | 0.007783 |
| TIPIN    | 274.3849 | 0.730819 | 0.214613 | 3.405289 | 0.000661 | 0.007812 |
| C5orf34  | 420.3558 | 0.501743 | 0.147352 | 3.405067 | 0.000661 | 0.007813 |
| POLR1E   | 1039.879 | 0.389551 | 0.114412 | 3.40481  | 0.000662 | 0.007814 |
| LRRC40   | 1316.904 | 0.520103 | 0.152835 | 3.403036 | 0.000666 | 0.007847 |
| PSMA5    | 2955.414 | 0.372778 | 0.109609 | 3.400999 | 0.000671 | 0.007888 |

|           |          |          |          |          |          |          |
|-----------|----------|----------|----------|----------|----------|----------|
| CHAF1A    | 1075.644 | 0.508369 | 0.149527 | 3.399853 | 0.000674 | 0.007906 |
| NEK3      | 258.9205 | 0.559287 | 0.164509 | 3.399734 | 0.000675 | 0.007906 |
| LOC100501 | 68.88107 | 0.919814 | 0.270531 | 3.40003  | 0.000674 | 0.007906 |
| TMEM5     | 299.5949 | 0.572894 | 0.168528 | 3.399403 | 0.000675 | 0.00791  |
| NT5C3A    | 808.6672 | 0.521647 | 0.153466 | 3.39911  | 0.000676 | 0.007912 |
| METTL18   | 225.4543 | 0.587845 | 0.17298  | 3.398344 | 0.000678 | 0.007922 |
| ZNF195    | 615.8441 | 0.596192 | 0.175482 | 3.397454 | 0.00068  | 0.007942 |
| NCAPG     | 2073.791 | 0.547967 | 0.161329 | 3.396571 | 0.000682 | 0.007962 |
| CRK       | 1472.139 | 0.382263 | 0.112579 | 3.395521 | 0.000685 | 0.007986 |
| RNFT1     | 295.6006 | 0.520055 | 0.153204 | 3.394519 | 0.000687 | 0.008004 |
| IFI44     | 410.8329 | 0.475066 | 0.140025 | 3.392725 | 0.000692 | 0.008038 |
| USP6NL    | 402.1579 | 0.56003  | 0.165147 | 3.391095 | 0.000696 | 0.008079 |
| TYW3      | 974.3635 | 0.498325 | 0.147027 | 3.389334 | 0.000701 | 0.008102 |
| NUPL2     | 607.8521 | 0.437081 | 0.129007 | 3.388041 | 0.000704 | 0.008132 |
| RWDD1     | 625.7073 | 0.545653 | 0.16109  | 3.387245 | 0.000706 | 0.008145 |
| HSPA12A   | 287.8961 | 0.522039 | 0.15413  | 3.387009 | 0.000707 | 0.008146 |
| AP4E1     | 960.1457 | 0.547118 | 0.161669 | 3.384179 | 0.000714 | 0.008224 |
| MIR1204   | 32.09287 | 1.246096 | 0.368353 | 3.382881 | 0.000717 | 0.008244 |
| OIP5      | 225.746  | 0.666806 | 0.197147 | 3.382272 | 0.000719 | 0.008251 |
| FAM118B   | 490.1772 | 0.456921 | 0.135152 | 3.380786 | 0.000723 | 0.008283 |
| MCUR1     | 573.9929 | 0.483925 | 0.14318  | 3.379836 | 0.000725 | 0.008306 |
| TCHP      | 427.9105 | 0.462588 | 0.136895 | 3.379136 | 0.000727 | 0.008321 |
| ERI1      | 1144.512 | 0.448399 | 0.132721 | 3.378517 | 0.000729 | 0.008333 |
| LSG1      | 1510.04  | 0.394283 | 0.116742 | 3.377389 | 0.000732 | 0.008351 |
| CEP162    | 270.1372 | 0.73223  | 0.216807 | 3.377328 | 0.000732 | 0.008351 |
| TRIM26    | 687.3854 | 0.440478 | 0.130458 | 3.376382 | 0.000734 | 0.008374 |
| CHKA      | 872.9865 | 0.403927 | 0.119743 | 3.373282 | 0.000743 | 0.008456 |
| TERF1     | 872.2543 | 0.504461 | 0.149569 | 3.372753 | 0.000744 | 0.00846  |
| MATR3     | 11842.29 | 0.446854 | 0.132507 | 3.372299 | 0.000745 | 0.008467 |
| CHD1      | 3098.518 | 0.529619 | 0.157095 | 3.371332 | 0.000748 | 0.008491 |
| LAP3      | 1243.913 | 0.408474 | 0.121289 | 3.367781 | 0.000758 | 0.008582 |
| MTAP      | 1303.162 | 0.45815  | 0.136036 | 3.367855 | 0.000758 | 0.008582 |
| SLC35F2   | 931.242  | 0.437485 | 0.129985 | 3.365652 | 0.000764 | 0.008631 |
| FKBP3     | 500.8349 | 0.508636 | 0.151128 | 3.365599 | 0.000764 | 0.008631 |
| SLC12A2   | 1252.494 | 0.431104 | 0.128243 | 3.361624 | 0.000775 | 0.008737 |
| SMCHD1    | 4148.799 | 0.480112 | 0.14283  | 3.361433 | 0.000775 | 0.008737 |
| LYN       | 1199.23  | 0.397645 | 0.118423 | 3.357832 | 0.000786 | 0.008839 |
| ZNF93     | 281.3208 | 0.595534 | 0.177377 | 3.357446 | 0.000787 | 0.008843 |
| CCDC150   | 207.2361 | 0.796923 | 0.237498 | 3.355491 | 0.000792 | 0.008894 |
| NDUFAF6   | 224.0048 | 0.585293 | 0.174629 | 3.351642 | 0.000803 | 0.009006 |
| CEP55     | 1724.547 | 0.541478 | 0.161585 | 3.351043 | 0.000805 | 0.009019 |
| TMX2      | 2042.197 | 0.365119 | 0.108993 | 3.349946 | 0.000808 | 0.009035 |
| ATR       | 3170.704 | 0.536258 | 0.160167 | 3.348126 | 0.000814 | 0.009081 |
| SOX4      | 1886.466 | 0.403387 | 0.120502 | 3.347545 | 0.000815 | 0.009094 |
| GALNT1    | 2081.683 | 0.415805 | 0.124277 | 3.345783 | 0.000821 | 0.009139 |
| WDR43     | 2106.099 | 0.463688 | 0.138666 | 3.343928 | 0.000826 | 0.009187 |
| ERH       | 1512.327 | 0.394921 | 0.11811  | 3.343682 | 0.000827 | 0.009188 |

|          |          |          |          |          |          |          |
|----------|----------|----------|----------|----------|----------|----------|
| PSMD14   | 2564.988 | 0.479024 | 0.143281 | 3.343247 | 0.000828 | 0.009189 |
| LSM5     | 1040.406 | 0.469469 | 0.140434 | 3.342979 | 0.000829 | 0.009192 |
| ILF2     | 4667.524 | 0.363102 | 0.108661 | 3.34161  | 0.000833 | 0.009215 |
| PHF14    | 2426.43  | 0.435571 | 0.13033  | 3.342053 | 0.000832 | 0.009215 |
| ERCC8    | 589.5863 | 0.469172 | 0.140453 | 3.340412 | 0.000837 | 0.009215 |
| COQ3     | 202.6315 | 0.689678 | 0.206468 | 3.340357 | 0.000837 | 0.009215 |
| TMEM97   | 1460.944 | 0.430715 | 0.128998 | 3.33892  | 0.000841 | 0.009254 |
| KCNJ2    | 68.6443  | 0.918877 | 0.275471 | 3.335658 | 0.000851 | 0.009337 |
| MRPS31   | 541.8603 | 0.473874 | 0.142111 | 3.334539 | 0.000854 | 0.009368 |
| fastkd3  | 353.7426 | 0.482181 | 0.144657 | 3.333264 | 0.000858 | 0.009397 |
| ARMC1    | 2444.92  | 0.435312 | 0.130713 | 3.330285 | 0.000868 | 0.009485 |
| c11orf95 | 404.9812 | 0.450693 | 0.13537  | 3.32935  | 0.00087  | 0.009498 |
| POLB     | 460.2813 | 0.470105 | 0.141202 | 3.329305 | 0.000871 | 0.009498 |
| SNORD102 | 92.11695 | 0.855788 | 0.257087 | 3.328781 | 0.000872 | 0.009509 |
| PSMA2    | 4293.022 | 0.376675 | 0.113173 | 3.328323 | 0.000874 | 0.009512 |
| MEX3A    | 497.3297 | 0.466539 | 0.140173 | 3.328304 | 0.000874 | 0.009512 |
| HELLS    | 1092.28  | 0.75998  | 0.228397 | 3.327447 | 0.000876 | 0.009535 |
| TSPAN3   | 3434.65  | 0.375745 | 0.11293  | 3.327226 | 0.000877 | 0.009536 |
| CEBPZ    | 2117.348 | 0.426075 | 0.128195 | 3.323657 | 0.000888 | 0.009638 |
| KRR1     | 857.7692 | 0.482041 | 0.145173 | 3.320452 | 0.000899 | 0.009724 |
| CHEK1    | 1052.934 | 0.487742 | 0.146892 | 3.320413 | 0.000899 | 0.009724 |
| UTP18    | 1677.79  | 0.42946  | 0.129424 | 3.318247 | 0.000906 | 0.009779 |
| PAIP1    | 1256.432 | 0.410278 | 0.123689 | 3.317017 | 0.00091  | 0.009808 |
| MRPS35   | 1507.069 | 0.415888 | 0.125378 | 3.317073 | 0.00091  | 0.009808 |
| RPL22L1  | 344.0884 | 0.545718 | 0.164633 | 3.314753 | 0.000917 | 0.00986  |
| WDR3     | 2867.709 | 0.438163 | 0.132213 | 3.314063 | 0.00092  | 0.009864 |
| DBF4     | 1882.199 | 0.528084 | 0.159411 | 3.312722 | 0.000924 | 0.009905 |
| PPM1G    | 1866.104 | 0.407727 | 0.123111 | 3.311862 | 0.000927 | 0.009928 |
| ZNF551   | 267.6358 | 0.59792  | 0.180569 | 3.311314 | 0.000929 | 0.009941 |
| PPA1     | 1807.823 | 0.404133 | 0.122192 | 3.307349 | 0.000942 | 0.010069 |
| NUP35    | 380.0548 | 0.600239 | 0.181574 | 3.305751 | 0.000947 | 0.010119 |
| DKC1     | 2191.868 | 0.403245 | 0.122023 | 3.304672 | 0.000951 | 0.010151 |
| ALAS1    | 1732.721 | 0.390524 | 0.118187 | 3.304277 | 0.000952 | 0.010152 |
| PRELID3B | 4004.667 | 0.378947 | 0.114692 | 3.304031 | 0.000953 | 0.010153 |
| ZNF37BP  | 734.681  | 0.548323 | 0.166255 | 3.298094 | 0.000973 | 0.010342 |
| setmar   | 218.377  | 0.661606 | 0.20065  | 3.297308 | 0.000976 | 0.010353 |
| ABCE1    | 3927.524 | 0.456226 | 0.138383 | 3.296833 | 0.000978 | 0.010353 |
| POLR2B   | 4161.049 | 0.383476 | 0.116387 | 3.294846 | 0.000985 | 0.010399 |
| RRP1B    | 1955.377 | 0.350383 | 0.106365 | 3.294171 | 0.000987 | 0.010406 |
| LYPLA1   | 3294.023 | 0.38075  | 0.115632 | 3.292782 | 0.000992 | 0.010446 |
| SMIM13   | 913.459  | 0.431956 | 0.13132  | 3.289335 | 0.001004 | 0.010546 |
| SOAT1    | 2039.308 | 0.465155 | 0.141406 | 3.2895   | 0.001004 | 0.010546 |
| TSNAX    | 948.1371 | 0.45028  | 0.136931 | 3.288379 | 0.001008 | 0.010575 |
| SKA3     | 767.2911 | 0.51726  | 0.157326 | 3.287832 | 0.00101  | 0.010588 |
| SUPT16H  | 3575.904 | 0.424308 | 0.129103 | 3.286597 | 0.001014 | 0.010627 |
| ZNF695   | 103.9417 | 0.702689 | 0.213934 | 3.284604 | 0.001021 | 0.010684 |
| lyrm7    | 1508.952 | 0.405152 | 0.123444 | 3.282075 | 0.00103  | 0.01077  |



|          |          |          |          |          |          |          |
|----------|----------|----------|----------|----------|----------|----------|
| HIBCH    | 499.746  | 0.477751 | 0.145653 | 3.280072 | 0.001038 | 0.010832 |
| PRIMPOL  | 534.7896 | 0.539138 | 0.164379 | 3.279857 | 0.001039 | 0.010833 |
| TARBP1   | 2486.259 | 0.440079 | 0.13419  | 3.279517 | 0.00104  | 0.010839 |
| ALPK2    | 4409.713 | 0.393702 | 0.120061 | 3.279178 | 0.001041 | 0.010844 |
| CENPP    | 132.9413 | 0.770871 | 0.235224 | 3.277175 | 0.001049 | 0.010914 |
| ST3GAL6  | 234.8619 | 0.609586 | 0.186039 | 3.276654 | 0.00105  | 0.010927 |
| VAV3     | 572.7986 | 0.663158 | 0.202437 | 3.275879 | 0.001053 | 0.01095  |
| BIVM     | 1735.957 | 0.412568 | 0.126019 | 3.273856 | 0.001061 | 0.010997 |
| CHCHD4   | 403.5344 | 0.488115 | 0.149101 | 3.273717 | 0.001061 | 0.010997 |
| ARHGAP42 | 863.3367 | 0.387045 | 0.118237 | 3.273458 | 0.001062 | 0.011    |
| SAP30L   | 1106.763 | 0.413717 | 0.126396 | 3.273173 | 0.001063 | 0.011003 |
| REEP1    | 68.1465  | 0.893652 | 0.273115 | 3.272074 | 0.001068 | 0.011036 |
| PMS1     | 707.5114 | 0.524528 | 0.160404 | 3.270038 | 0.001075 | 0.011104 |
| CENPH    | 1152.941 | 0.44593  | 0.136403 | 3.269206 | 0.001078 | 0.011128 |
| CMC2     | 539.2023 | 0.507482 | 0.155274 | 3.268308 | 0.001082 | 0.011149 |
| EXO5     | 53.21884 | 0.939679 | 0.287596 | 3.267358 | 0.001086 | 0.011179 |
| ZNF92    | 550.6969 | 0.551771 | 0.168886 | 3.267117 | 0.001086 | 0.011181 |
| SNORD56  | 16.73992 | 1.672447 | 0.512018 | 3.266383 | 0.001089 | 0.011201 |
| ATP5F1   | 4516.413 | 0.363129 | 0.111208 | 3.265318 | 0.001093 | 0.011215 |
| TATDN1   | 534.4711 | 0.477297 | 0.146221 | 3.264209 | 0.001098 | 0.011244 |
| PSPC1    | 1155.055 | 0.405335 | 0.124214 | 3.263207 | 0.001102 | 0.011275 |
| CES1P2   | 48.39034 | 1.39592  | 0.427826 | 3.26282  | 0.001103 | 0.011277 |
| SDHB     | 1677.964 | 0.362337 | 0.111104 | 3.261249 | 0.001109 | 0.011332 |
| FANCL    | 710.4011 | 0.514307 | 0.157737 | 3.260536 | 0.001112 | 0.011346 |
| COQ2     | 414.8265 | 0.533855 | 0.163741 | 3.260355 | 0.001113 | 0.011346 |
| LRPPRC   | 6212.62  | 0.444756 | 0.136511 | 3.258017 | 0.001122 | 0.011411 |
| MRPL46   | 401.7135 | 0.464826 | 0.142742 | 3.256403 | 0.001128 | 0.011454 |
| CENPQ    | 485.6544 | 0.467969 | 0.143709 | 3.256358 | 0.001129 | 0.011454 |
| GLCE     | 1283.38  | 0.390874 | 0.120062 | 3.255601 | 0.001132 | 0.011469 |
| SNRPE    | 1120.306 | 0.450503 | 0.138429 | 3.254407 | 0.001136 | 0.011502 |
| NCBP3    | 1244.988 | 0.399807 | 0.122865 | 3.254032 | 0.001138 | 0.01151  |
| MTOR     | 3055.984 | 0.37092  | 0.114018 | 3.253173 | 0.001141 | 0.011537 |
| MAT2B    | 2469.667 | 0.350289 | 0.107747 | 3.25103  | 0.00115  | 0.011602 |
| DDX10    | 1592.842 | 0.446118 | 0.137242 | 3.250598 | 0.001152 | 0.011604 |
| SRPK1    | 5967.58  | 0.392184 | 0.120703 | 3.249175 | 0.001157 | 0.011652 |
| VANGL1   | 1684.506 | 0.374053 | 0.115177 | 3.247626 | 0.001164 | 0.011673 |
| SCYL2    | 1533.636 | 0.453236 | 0.139553 | 3.247772 | 0.001163 | 0.011673 |
| tmem70   | 567.7096 | 0.453451 | 0.13962  | 3.247745 | 0.001163 | 0.011673 |
| Ppial4g  | 61.7688  | 0.870856 | 0.268171 | 3.247388 | 0.001165 | 0.011675 |
| SET      | 9460.687 | 0.368774 | 0.113577 | 3.246901 | 0.001167 | 0.011687 |
| ZNF280C  | 581.6075 | 0.510781 | 0.15735  | 3.246148 | 0.00117  | 0.011709 |
| POLR2K   | 1105.343 | 0.421902 | 0.13     | 3.245405 | 0.001173 | 0.011712 |
| SF3A3    | 2507.186 | 0.386908 | 0.119262 | 3.244189 | 0.001178 | 0.011733 |
| PLSCR1   | 869.2666 | 0.392959 | 0.121136 | 3.243946 | 0.001179 | 0.011733 |
| HSPBAP1  | 111.5279 | 0.70932  | 0.218656 | 3.243996 | 0.001179 | 0.011733 |
| UPF3B    | 452.5191 | 0.544783 | 0.167982 | 3.243096 | 0.001182 | 0.011753 |
| ZNF878   | 27.6088  | 1.284319 | 0.396108 | 3.242348 | 0.001185 | 0.011769 |

|          |          |          |          |          |          |          |
|----------|----------|----------|----------|----------|----------|----------|
| SLC38A1  | 6464.52  | 0.425072 | 0.131269 | 3.238164 | 0.001203 | 0.011904 |
| TIMM8A   | 280.8297 | 0.553716 | 0.171007 | 3.237973 | 0.001204 | 0.011905 |
| CISD1    | 542.3838 | 0.452382 | 0.139756 | 3.236932 | 0.001208 | 0.011933 |
| MIR616   | 32.24392 | 1.150142 | 0.355351 | 3.236634 | 0.001209 | 0.011938 |
| OLA1     | 4473.647 | 0.439051 | 0.135673 | 3.236104 | 0.001212 | 0.011952 |
| UBA2     | 4251.909 | 0.393638 | 0.121721 | 3.233936 | 0.001221 | 0.012019 |
| OTUD6B   | 674.3137 | 0.559623 | 0.173132 | 3.232344 | 0.001228 | 0.012057 |
| CBX1     | 2802.957 | 0.361402 | 0.111856 | 3.230954 | 0.001234 | 0.012108 |
| DUSP5    | 475.3707 | 0.482164 | 0.149391 | 3.227521 | 0.001249 | 0.012239 |
| CFAP97   | 2622.654 | 0.404498 | 0.125336 | 3.227309 | 0.00125  | 0.01224  |
| FAM92A   | 762.8952 | 0.442219 | 0.137047 | 3.226775 | 0.001252 | 0.012247 |
| LOC10029 | 652.8815 | 0.481787 | 0.149393 | 3.224972 | 0.00126  | 0.012309 |
| TMX4     | 1324.595 | 0.433381 | 0.134408 | 3.224381 | 0.001262 | 0.012319 |
| NUP50    | 2548.173 | 0.460805 | 0.142997 | 3.22247  | 0.001271 | 0.012394 |
| C5ORF22  | 988.5102 | 0.47119  | 0.146252 | 3.221765 | 0.001274 | 0.012408 |
| ADAT1    | 681.8373 | 0.46234  | 0.143622 | 3.219135 | 0.001286 | 0.0125   |
| TBK1     | 1365.793 | 0.402031 | 0.124911 | 3.218539 | 0.001288 | 0.012517 |
| AZIN1    | 6153.605 | 0.383333 | 0.119145 | 3.217357 | 0.001294 | 0.01253  |
| RBMX     | 6599.72  | 0.394914 | 0.122781 | 3.216419 | 0.001298 | 0.012546 |
| EIF2S1   | 2178.927 | 0.436341 | 0.135649 | 3.216689 | 0.001297 | 0.012546 |
| CEP97    | 1289.274 | 0.464549 | 0.144449 | 3.216004 | 0.0013   | 0.012546 |
| LOC10050 | 257.2877 | 0.543768 | 0.169078 | 3.216087 | 0.0013   | 0.012546 |
| GOT2     | 3229.423 | 0.34586  | 0.107565 | 3.215354 | 0.001303 | 0.012562 |
| PPAT     | 1134.027 | 0.439355 | 0.13672  | 3.213531 | 0.001311 | 0.012626 |
| NOC3L    | 1170.729 | 0.473016 | 0.147194 | 3.213554 | 0.001311 | 0.012626 |
| FECH     | 1526.418 | 0.354875 | 0.110526 | 3.210773 | 0.001324 | 0.012724 |
| DPH3     | 595.1503 | 0.497153 | 0.15485  | 3.210542 | 0.001325 | 0.012727 |
| NSL1     | 1511.644 | 0.400749 | 0.124835 | 3.210233 | 0.001326 | 0.01273  |
| UTP20    | 2210.508 | 0.488658 | 0.15227  | 3.209162 | 0.001331 | 0.012756 |
| DDX3X    | 5274.836 | 0.405361 | 0.126371 | 3.207719 | 0.001338 | 0.012812 |
| TMEM209  | 1321.174 | 0.438809 | 0.136872 | 3.205988 | 0.001346 | 0.012874 |
| IFNGR1   | 966.4533 | 0.472091 | 0.147297 | 3.205032 | 0.00135  | 0.012901 |
| PAQR3    | 698.8808 | 0.448175 | 0.139848 | 3.204726 | 0.001352 | 0.012906 |
| ATP11C   | 2384.96  | 0.403122 | 0.12582  | 3.203971 | 0.001355 | 0.012932 |
| STX18    | 422.2007 | 0.478468 | 0.149414 | 3.202304 | 0.001363 | 0.012979 |
| CASP8AP2 | 1356.554 | 0.540512 | 0.168793 | 3.202212 | 0.001364 | 0.012979 |
| APOL6    | 2959.763 | 0.365294 | 0.114092 | 3.201757 | 0.001366 | 0.012992 |
| TEFM     | 334.1685 | 0.567394 | 0.177287 | 3.200421 | 0.001372 | 0.013036 |
| PARP1    | 4781.11  | 0.384851 | 0.120276 | 3.199733 | 0.001376 | 0.013059 |
| SBDSP1   | 377.8405 | 0.536233 | 0.167678 | 3.197994 | 0.001384 | 0.013106 |
| SKA1     | 511.1191 | 0.590941 | 0.18483  | 3.197222 | 0.001388 | 0.013133 |
| GTF2I    | 11646.91 | 0.346909 | 0.108626 | 3.193606 | 0.001405 | 0.013291 |
| NDUFAB1  | 1125.5   | 0.396677 | 0.124217 | 3.19342  | 0.001406 | 0.013291 |
| UHRF1BP1 | 1332.366 | 0.385918 | 0.120857 | 3.193172 | 0.001407 | 0.013294 |
| SCO1     | 842.5014 | 0.452452 | 0.141704 | 3.192931 | 0.001408 | 0.013297 |
| AKR1C4   | 112.7166 | 0.691005 | 0.216458 | 3.192332 | 0.001411 | 0.013317 |
| AIMP2    | 264.292  | 0.608612 | 0.190709 | 3.191312 | 0.001416 | 0.013356 |

|          |          |          |          |          |          |          |
|----------|----------|----------|----------|----------|----------|----------|
| coa6     | 757.3154 | 0.444939 | 0.139458 | 3.190495 | 0.00142  | 0.013385 |
| XPO1     | 9350.622 | 0.454842 | 0.142606 | 3.189504 | 0.001425 | 0.0134   |
| NDC1     | 2881.246 | 0.461985 | 0.144847 | 3.189466 | 0.001425 | 0.0134   |
| KLF4     | 64.32228 | 0.928908 | 0.291222 | 3.189692 | 0.001424 | 0.0134   |
| SERF1A   | 783.6534 | 0.392862 | 0.12325  | 3.187513 | 0.001435 | 0.01345  |
| PPARGC1A | 118.6691 | 0.795572 | 0.249662 | 3.186595 | 0.00144  | 0.013477 |
| DAP3     | 2301.344 | 0.352274 | 0.110647 | 3.183775 | 0.001454 | 0.013579 |
| ETV5     | 956.3428 | 0.591127 | 0.185682 | 3.183554 | 0.001455 | 0.013579 |
| Uqcrc2   | 5684.627 | 0.348734 | 0.109575 | 3.182602 | 0.00146  | 0.013601 |
| SERF1B   | 792.4041 | 0.38627  | 0.121379 | 3.182359 | 0.001461 | 0.013601 |
| PHF20L1  | 2515.132 | 0.453455 | 0.142523 | 3.181614 | 0.001465 | 0.01362  |
| NDUFB3   | 726.3489 | 0.415465 | 0.130653 | 3.179912 | 0.001473 | 0.013683 |
| PRPF4    | 1123.081 | 0.369521 | 0.116263 | 3.178323 | 0.001481 | 0.01375  |
| MKKS     | 1097.986 | 0.483691 | 0.152196 | 3.178087 | 0.001483 | 0.013753 |
| KIF23    | 3775.091 | 0.484135 | 0.15248  | 3.175074 | 0.001498 | 0.013872 |
| parp2    | 495.4883 | 0.46655  | 0.146962 | 3.174625 | 0.0015   | 0.013877 |
| brca2    | 2626.456 | 0.626242 | 0.197264 | 3.17464  | 0.0015   | 0.013877 |
| FBXO45   | 1436.891 | 0.414248 | 0.130507 | 3.174152 | 0.001503 | 0.013891 |
| ASPN     | 32.66183 | 1.294988 | 0.408332 | 3.171411 | 0.001517 | 0.013989 |
| TOMM5    | 1289.27  | 0.40932  | 0.129095 | 3.170678 | 0.001521 | 0.014008 |
| MTCH2    | 2756.321 | 0.377427 | 0.119084 | 3.169413 | 0.001527 | 0.014041 |
| NGDN     | 356.597  | 0.47741  | 0.150636 | 3.169303 | 0.001528 | 0.014041 |
| MDM1     | 405.9488 | 0.487086 | 0.153764 | 3.167744 | 0.001536 | 0.014104 |
| ZNF180   | 362.6213 | 0.517397 | 0.163338 | 3.167649 | 0.001537 | 0.014104 |
| EXOSC2   | 1137.245 | 0.407407 | 0.128672 | 3.166234 | 0.001544 | 0.01416  |
| NDUFB6   | 694.4587 | 0.429352 | 0.135653 | 3.165067 | 0.00155  | 0.014179 |
| TRIM33   | 2724.628 | 0.440106 | 0.139045 | 3.165205 | 0.00155  | 0.014179 |
| TBC1D4   | 1860.635 | 0.376384 | 0.118945 | 3.16435  | 0.001554 | 0.014206 |
| SLC38A9  | 386.4602 | 0.536215 | 0.169533 | 3.162901 | 0.001562 | 0.014249 |
| GMPS     | 3930.239 | 0.405804 | 0.128355 | 3.161576 | 0.001569 | 0.014284 |
| ZBTB24   | 594.1442 | 0.441412 | 0.139627 | 3.161371 | 0.00157  | 0.014284 |
| MTFR2    | 134.4023 | 0.658925 | 0.208406 | 3.161731 | 0.001568 | 0.014284 |
| XPO4     | 2745.362 | 0.503773 | 0.159368 | 3.16107  | 0.001572 | 0.014291 |
| PPIH     | 957.4226 | 0.377963 | 0.119665 | 3.158513 | 0.001586 | 0.014387 |
| ZNF480   | 780.3596 | 0.538823 | 0.170613 | 3.158154 | 0.001588 | 0.014392 |
| LARP7    | 1098.231 | 0.392423 | 0.124302 | 3.157014 | 0.001594 | 0.01444  |
| ADSS     | 1679.679 | 0.3875   | 0.122792 | 3.155737 | 0.001601 | 0.014495 |
| ARIH2    | 2406.741 | 0.338252 | 0.107271 | 3.153245 | 0.001615 | 0.014585 |
| TEAD2    | 992.4377 | 0.45487  | 0.144327 | 3.151664 | 0.001623 | 0.01464  |
| RPP40    | 244.8249 | 0.553425 | 0.175583 | 3.151922 | 0.001622 | 0.01464  |
| Snord72  | 26.9857  | 1.34384  | 0.426394 | 3.151638 | 0.001624 | 0.01464  |
| TOR3A    | 723.3729 | 0.40339  | 0.128261 | 3.145064 | 0.001661 | 0.014929 |
| BCLAF1   | 5555.292 | 0.475977 | 0.151351 | 3.144863 | 0.001662 | 0.014931 |
| ZNF473   | 517.8484 | 0.427302 | 0.135942 | 3.143273 | 0.001671 | 0.014996 |
| RBM47    | 367.1828 | 0.493935 | 0.15716  | 3.142887 | 0.001673 | 0.014997 |
| NDUFA9   | 1761.546 | 0.377545 | 0.120154 | 3.14218  | 0.001677 | 0.015016 |
| APTX     | 822.1561 | 0.382265 | 0.121794 | 3.138614 | 0.001697 | 0.015173 |

|           |          |          |          |          |          |          |
|-----------|----------|----------|----------|----------|----------|----------|
| RAD51C    | 350.5514 | 0.448041 | 0.142821 | 3.137072 | 0.001706 | 0.015227 |
| MTRR      | 959.8698 | 0.367854 | 0.117332 | 3.135144 | 0.001718 | 0.015284 |
| UBA3      | 2019.651 | 0.396922 | 0.126605 | 3.135117 | 0.001718 | 0.015284 |
| SMC4      | 8853.741 | 0.523028 | 0.166805 | 3.135563 | 0.001715 | 0.015284 |
| FAM171B   | 122.9866 | 0.641471 | 0.204638 | 3.134667 | 0.00172  | 0.015299 |
| TBPL1     | 424.7881 | 0.449053 | 0.143291 | 3.133864 | 0.001725 | 0.015332 |
| STEAP1    | 514.5061 | 0.437405 | 0.139654 | 3.132062 | 0.001736 | 0.015396 |
| rnu12     | 135.4497 | 0.613742 | 0.196072 | 3.130189 | 0.001747 | 0.015476 |
| KLHL42    | 1168.319 | 0.414238 | 0.132349 | 3.129907 | 0.001749 | 0.015477 |
| NEDD1     | 1241.858 | 0.460312 | 0.14708  | 3.129663 | 0.00175  | 0.015477 |
| NAA50     | 5833.001 | 0.403703 | 0.129032 | 3.128703 | 0.001756 | 0.015506 |
| ZC3H8     | 199.6392 | 0.590009 | 0.188669 | 3.127209 | 0.001765 | 0.015558 |
| DEPDC1    | 3623.222 | 0.462889 | 0.148033 | 3.126937 | 0.001766 | 0.015564 |
| SMAD1     | 313.4731 | 0.50005  | 0.16022  | 3.121015 | 0.001802 | 0.015862 |
| BRMS1L    | 175.2439 | 0.638536 | 0.204656 | 3.120051 | 0.001808 | 0.015896 |
| RANBP1    | 1745.811 | 0.392856 | 0.12601  | 3.117649 | 0.001823 | 0.015999 |
| PARP9     | 570.3798 | 0.43041  | 0.13805  | 3.117791 | 0.001822 | 0.015999 |
| MOCOS     | 65.97914 | 0.863323 | 0.277079 | 3.115802 | 0.001834 | 0.016072 |
| NUP98     | 6161.584 | 0.316386 | 0.101692 | 3.111205 | 0.001863 | 0.016275 |
| H2AFV     | 5570.635 | 0.350541 | 0.112659 | 3.111513 | 0.001861 | 0.016275 |
| PHAX      | 1380.741 | 0.359    | 0.115393 | 3.111098 | 0.001864 | 0.016275 |
| MTHFD1    | 1599.642 | 0.37809  | 0.121509 | 3.111632 | 0.001861 | 0.016275 |
| MAD2L1    | 1858.299 | 0.411058 | 0.132121 | 3.111234 | 0.001863 | 0.016275 |
| SNX2      | 1609.865 | 0.406471 | 0.130672 | 3.110624 | 0.001867 | 0.016282 |
| SOD1      | 6191.32  | 0.30949  | 0.099596 | 3.107458 | 0.001887 | 0.016439 |
| AP5M1     | 530.5624 | 0.464473 | 0.149464 | 3.107595 | 0.001886 | 0.016439 |
| CUL3      | 4229.457 | 0.384371 | 0.123794 | 3.104922 | 0.001903 | 0.016562 |
| ZNF35     | 275.4925 | 0.584823 | 0.188549 | 3.101712 | 0.001924 | 0.016714 |
| PKD2      | 1373.507 | 0.432923 | 0.139637 | 3.100349 | 0.001933 | 0.016763 |
| MRPL21    | 661.3592 | 0.391454 | 0.126282 | 3.099834 | 0.001936 | 0.016783 |
| RAB1F     | 165.9478 | 0.557363 | 0.179832 | 3.099348 | 0.001939 | 0.016801 |
| TMSB15A   | 65.50227 | 0.86238  | 0.278321 | 3.098507 | 0.001945 | 0.016839 |
| LRRC8B    | 55.45411 | 0.967277 | 0.312312 | 3.097149 | 0.001954 | 0.016898 |
| hdgfrp3   | 1985.723 | 0.469985 | 0.151759 | 3.096929 | 0.001955 | 0.016901 |
| LOC390951 | 14.32166 | 1.72955  | 0.558506 | 3.096741 | 0.001957 | 0.016902 |
| CMTR2     | 899.9736 | 0.397899 | 0.128508 | 3.096293 | 0.00196  | 0.016918 |
| TRIM22    | 894.7955 | 0.371763 | 0.120103 | 3.095364 | 0.001966 | 0.016926 |
| DNAJB6    | 1040.933 | 0.377242 | 0.121884 | 3.095075 | 0.001968 | 0.016926 |
| DCUN1D5   | 1456.176 | 0.414563 | 0.133923 | 3.095529 | 0.001965 | 0.016926 |
| ATAD5     | 1819.76  | 0.506346 | 0.163601 | 3.094999 | 0.001968 | 0.016926 |
| SUZ12     | 2921.282 | 0.446321 | 0.144218 | 3.09477  | 0.00197  | 0.01693  |
| TMEM183   | 1102.762 | 0.350864 | 0.113446 | 3.092768 | 0.001983 | 0.017035 |
| PSIP1     | 3040.765 | 0.426383 | 0.137893 | 3.092131 | 0.001987 | 0.017043 |
| TRIAP1    | 498.8231 | 0.47012  | 0.152035 | 3.092175 | 0.001987 | 0.017043 |
| GK3P      | 60.45411 | 0.87592  | 0.283267 | 3.092208 | 0.001987 | 0.017043 |
| IFIT3     | 252.5391 | 0.570445 | 0.184578 | 3.09054  | 0.001998 | 0.017125 |
| CS        | 3426.954 | 0.370454 | 0.119981 | 3.087607 | 0.002018 | 0.017284 |

|           |          |          |          |          |          |          |
|-----------|----------|----------|----------|----------|----------|----------|
| XXYLT1    | 390.3234 | 0.448389 | 0.145256 | 3.086886 | 0.002023 | 0.017298 |
| RMDN2     | 58.86945 | 0.822736 | 0.266617 | 3.085832 | 0.00203  | 0.017341 |
| CMTM6     | 4457.71  | 0.33963  | 0.110128 | 3.083944 | 0.002043 | 0.017409 |
| MALT1     | 2444.16  | 0.38838  | 0.125987 | 3.082695 | 0.002051 | 0.017457 |
| ATP5A1    | 9355.17  | 0.301592 | 0.097854 | 3.08205  | 0.002056 | 0.017485 |
| FIGNL1    | 489.9306 | 0.624753 | 0.202761 | 3.081228 | 0.002061 | 0.017504 |
| PDCD2     | 842.4824 | 0.388664 | 0.126256 | 3.078383 | 0.002081 | 0.017634 |
| SNHG1     | 2143.96  | 0.43241  | 0.140501 | 3.077636 | 0.002086 | 0.017659 |
| SRSF10    | 3125.319 | 0.428857 | 0.139361 | 3.077316 | 0.002089 | 0.017668 |
| CCND1     | 3126.816 | 0.389166 | 0.126484 | 3.076799 | 0.002092 | 0.017689 |
| BTG2      | 54.9416  | 0.938308 | 0.30502  | 3.076212 | 0.002096 | 0.017714 |
| RHBDL3    | 252.945  | 0.48408  | 0.157489 | 3.073734 | 0.002114 | 0.017832 |
| MIS18BP1  | 729.1554 | 0.485406 | 0.157982 | 3.072536 | 0.002122 | 0.017885 |
| FBN2      | 714.9333 | 0.401676 | 0.130744 | 3.07223  | 0.002125 | 0.017893 |
| DONSON    | 1423.965 | 0.373867 | 0.121724 | 3.071425 | 0.00213  | 0.017913 |
| KATNBL1P  | 108.1447 | 0.775572 | 0.252512 | 3.07142  | 0.00213  | 0.017913 |
| HMMR      | 2492.284 | 0.548178 | 0.178605 | 3.069221 | 0.002146 | 0.018025 |
| HNRNPH1   | 13532.68 | 0.309993 | 0.101162 | 3.064313 | 0.002182 | 0.018266 |
| MTIF2     | 1518.575 | 0.406632 | 0.132686 | 3.064613 | 0.00218  | 0.018266 |
| MSX1      | 119.4853 | 0.643895 | 0.21014  | 3.064122 | 0.002183 | 0.018266 |
| TRAPPC10  | 1793.06  | 0.329993 | 0.107756 | 3.062396 | 0.002196 | 0.018352 |
| c1orf216  | 659.2374 | 0.383168 | 0.125216 | 3.060065 | 0.002213 | 0.018465 |
| MED17     | 1081.431 | 0.357305 | 0.116788 | 3.059437 | 0.002218 | 0.018494 |
| SLC35B4   | 1226.811 | 0.4754   | 0.155432 | 3.058568 | 0.002224 | 0.018528 |
| DUSP12    | 482.9095 | 0.466899 | 0.152683 | 3.057969 | 0.002228 | 0.018555 |
| STIL      | 2143.448 | 0.465242 | 0.152153 | 3.057735 | 0.00223  | 0.018559 |
| FGD5-AS1  | 3107.21  | 0.309367 | 0.101254 | 3.055361 | 0.002248 | 0.018646 |
| NUP133    | 2087.396 | 0.361611 | 0.11835  | 3.055433 | 0.002247 | 0.018646 |
| LAPTM4B   | 3733.061 | 0.30877  | 0.101082 | 3.054664 | 0.002253 | 0.01866  |
| VASH2     | 371.8371 | 0.519228 | 0.169997 | 3.054345 | 0.002256 | 0.018669 |
| TMTC3     | 2729.595 | 0.409195 | 0.134013 | 3.053402 | 0.002263 | 0.018718 |
| POLE2     | 195.5636 | 0.655657 | 0.214805 | 3.052329 | 0.002271 | 0.018765 |
| MGME1     | 1202.779 | 0.404206 | 0.132442 | 3.051943 | 0.002274 | 0.018779 |
| RPP30     | 669.7236 | 0.436285 | 0.142972 | 3.051551 | 0.002277 | 0.018794 |
| ZNF724    | 471.5545 | 0.517739 | 0.169732 | 3.050327 | 0.002286 | 0.01886  |
| SNORD45A  | 104.1565 | 0.731047 | 0.239676 | 3.050145 | 0.002287 | 0.018862 |
| INTS8     | 2475.222 | 0.38892  | 0.127569 | 3.048698 | 0.002298 | 0.018943 |
| PARPBP    | 478.6303 | 0.533128 | 0.174888 | 3.048405 | 0.002301 | 0.018951 |
| PTS       | 441.0995 | 0.42763  | 0.140326 | 3.047397 | 0.002308 | 0.019005 |
| ATP6VOA2  | 729.5058 | 0.422303 | 0.138594 | 3.047059 | 0.002311 | 0.019006 |
| MRPL32    | 1110.845 | 0.356525 | 0.117133 | 3.043757 | 0.002336 | 0.019195 |
| ZNF98     | 48.29669 | 0.963705 | 0.316776 | 3.042229 | 0.002348 | 0.019262 |
| XAF1      | 442.3953 | 0.438468 | 0.144148 | 3.041793 | 0.002352 | 0.01928  |
| HIST1H2AI | 20.47922 | 1.751125 | 0.57579  | 3.041259 | 0.002356 | 0.019304 |
| ACTR3     | 9361.368 | 0.352874 | 0.116049 | 3.040743 | 0.00236  | 0.019327 |
| MOB4      | 1394.552 | 0.378879 | 0.12479  | 3.036127 | 0.002396 | 0.019586 |
| ADH5      | 5013.011 | 0.342509 | 0.112829 | 3.035659 | 0.0024   | 0.019603 |

|           |          |          |          |          |          |          |
|-----------|----------|----------|----------|----------|----------|----------|
| NUFIP1    | 499.2917 | 0.477521 | 0.157331 | 3.035125 | 0.002404 | 0.019628 |
| C1orf131  | 316.4164 | 0.467988 | 0.154245 | 3.034049 | 0.002413 | 0.019687 |
| NDUFV2    | 1305.221 | 0.359909 | 0.118681 | 3.032574 | 0.002425 | 0.01974  |
| FAM96A    | 837.4417 | 0.391944 | 0.129249 | 3.032474 | 0.002426 | 0.01974  |
| FAM43A    | 203.0292 | 0.578729 | 0.190919 | 3.031272 | 0.002435 | 0.019796 |
| DBR1      | 462.889  | 0.431326 | 0.142425 | 3.028442 | 0.002458 | 0.019962 |
| CCDC121   | 81.81249 | 0.699332 | 0.230977 | 3.027709 | 0.002464 | 0.02     |
| TXLNG     | 849.2679 | 0.440885 | 0.145704 | 3.025901 | 0.002479 | 0.020088 |
| DNAJC8    | 2425.113 | 0.325867 | 0.107742 | 3.024501 | 0.00249  | 0.020149 |
| SDHD      | 2136.054 | 0.326705 | 0.108061 | 3.023346 | 0.0025   | 0.020206 |
| c5orf30   | 868.1405 | 0.436999 | 0.144542 | 3.023333 | 0.0025   | 0.020206 |
| HNRNPR    | 6623.582 | 0.358116 | 0.11851  | 3.021805 | 0.002513 | 0.020298 |
| EFCAB2    | 147.0515 | 0.64749  | 0.214289 | 3.021571 | 0.002515 | 0.020303 |
| CCT8      | 7180.343 | 0.367362 | 0.121632 | 3.020267 | 0.002526 | 0.020369 |
| Snord52   | 28.05922 | 1.181726 | 0.391446 | 3.018875 | 0.002537 | 0.020452 |
| ZFP69     | 156.471  | 0.597416 | 0.198035 | 3.016714 | 0.002555 | 0.020566 |
| NEMF      | 1174.129 | 0.407764 | 0.135189 | 3.016242 | 0.002559 | 0.020588 |
| LIN52     | 199.1527 | 0.51548  | 0.170941 | 3.015542 | 0.002565 | 0.020607 |
| TIMM23    | 828.2315 | 0.396829 | 0.131625 | 3.014833 | 0.002571 | 0.020619 |
| hist1h2bm | 111.0738 | 0.836233 | 0.277364 | 3.014934 | 0.00257  | 0.020619 |
| PRPF38B   | 1170.861 | 0.369383 | 0.122534 | 3.014546 | 0.002574 | 0.020628 |
| GATS      | 418.8044 | 0.425715 | 0.141239 | 3.01414  | 0.002577 | 0.020645 |
| SYNE2     | 2436.342 | 0.4627   | 0.153546 | 3.013429 | 0.002583 | 0.020683 |
| MTX2      | 942.5705 | 0.40139  | 0.133211 | 3.013191 | 0.002585 | 0.020688 |
| FRAT2     | 191.7182 | 0.544769 | 0.180915 | 3.011193 | 0.002602 | 0.020792 |
| CRSP8P    | 167.5579 | 0.564945 | 0.18769  | 3.009994 | 0.002613 | 0.020853 |
| DCUN1D1   | 1699.483 | 0.432041 | 0.143625 | 3.008113 | 0.002629 | 0.020961 |
| sdcl      | 449.0052 | 0.520085 | 0.173053 | 3.005344 | 0.002653 | 0.021142 |
| CDK5RAP1  | 822.8666 | 0.356171 | 0.118526 | 3.00499  | 0.002656 | 0.021155 |
| COMMD2    | 1274.663 | 0.361403 | 0.120309 | 3.003964 | 0.002665 | 0.021194 |
| S1PR1     | 26.70273 | 1.307854 | 0.435631 | 3.002204 | 0.00268  | 0.021306 |
| BPGM      | 756.8221 | 0.405401 | 0.135051 | 3.001845 | 0.002683 | 0.021309 |
| CENPF     | 12415.87 | 0.535805 | 0.178485 | 3.001962 | 0.002682 | 0.021309 |
| PSMC6     | 915.357  | 0.42327  | 0.141095 | 2.999885 | 0.002701 | 0.021425 |
| ZHX1      | 1640.128 | 0.409398 | 0.136534 | 2.998514 | 0.002713 | 0.021488 |
| PUS3      | 404.5535 | 0.464975 | 0.155065 | 2.998573 | 0.002712 | 0.021488 |
| PIN4      | 610.3701 | 0.397923 | 0.132788 | 2.99667  | 0.002729 | 0.021574 |
| WDR53     | 395.4565 | 0.459009 | 0.153171 | 2.996711 | 0.002729 | 0.021574 |
| ZNF442    | 60.33854 | 0.856107 | 0.285675 | 2.996787 | 0.002728 | 0.021574 |
| MYLIP     | 425.0683 | 0.551626 | 0.184138 | 2.995724 | 0.002738 | 0.02163  |
| CDK5R1    | 72.7536  | 0.729498 | 0.243554 | 2.995219 | 0.002742 | 0.021655 |
| PPP6R3    | 4645.521 | 0.345714 | 0.115442 | 2.994696 | 0.002747 | 0.021681 |
| MRPL1     | 353.0855 | 0.543986 | 0.181722 | 2.993504 | 0.002758 | 0.021755 |
| GLRX3     | 1575.063 | 0.373523 | 0.124948 | 2.989437 | 0.002795 | 0.022009 |
| KNL1      | 2134.58  | 0.50121  | 0.16768  | 2.989084 | 0.002798 | 0.022016 |
| DLGAP1-A  | 138.5523 | 0.66087  | 0.221121 | 2.988728 | 0.002801 | 0.02203  |
| SUMO1     | 1845.023 | 0.349625 | 0.117059 | 2.986735 | 0.00282  | 0.022141 |

|          |          |          |          |          |          |          |
|----------|----------|----------|----------|----------|----------|----------|
| SDAD1    | 1243.81  | 0.418462 | 0.140118 | 2.986498 | 0.002822 | 0.022142 |
| EBF1     | 356.2557 | 0.41754  | 0.139836 | 2.985917 | 0.002827 | 0.022166 |
| VPS50    | 1704.742 | 0.419892 | 0.140663 | 2.985091 | 0.002835 | 0.02217  |
| NDC80    | 1048.265 | 0.474786 | 0.159052 | 2.985088 | 0.002835 | 0.02217  |
| ITGB3BP  | 1016.479 | 0.476217 | 0.159531 | 2.985101 | 0.002835 | 0.02217  |
| MND1     | 200.9477 | 0.65244  | 0.218546 | 2.985371 | 0.002832 | 0.02217  |
| HARBI1   | 97.02781 | 0.649381 | 0.217599 | 2.9843   | 0.002842 | 0.022193 |
| GXYLT1   | 805.5752 | 0.545755 | 0.183082 | 2.980936 | 0.002874 | 0.022416 |
| ZNF254   | 754.529  | 0.490531 | 0.164576 | 2.980585 | 0.002877 | 0.02243  |
| ALDH1A1  | 147.0575 | 0.8089   | 0.271516 | 2.979201 | 0.00289  | 0.02252  |
| SNRPD3   | 2400.584 | 0.318751 | 0.107041 | 2.97785  | 0.002903 | 0.0226   |
| SMARCD1  | 932.4935 | 0.369673 | 0.124171 | 2.977135 | 0.00291  | 0.022616 |
| SOX11    | 1170.117 | 0.444645 | 0.149377 | 2.976653 | 0.002914 | 0.022639 |
| DCLRE1A  | 478.0925 | 0.479644 | 0.161143 | 2.976513 | 0.002915 | 0.022639 |
| MPHOSPH  | 979.8544 | 0.422662 | 0.14207  | 2.975037 | 0.00293  | 0.022714 |
| grpel2   | 1315.138 | 0.420897 | 0.141579 | 2.972873 | 0.00295  | 0.022829 |
| MMACHC   | 658.0477 | 0.602788 | 0.202952 | 2.970098 | 0.002977 | 0.023013 |
| MIR3153  | 37.07724 | 1.130115 | 0.380547 | 2.96971  | 0.002981 | 0.02303  |
| RABGGTB  | 2029.799 | 0.440355 | 0.148332 | 2.96872  | 0.00299  | 0.023082 |
| TM2D2    | 692.635  | 0.373738 | 0.125912 | 2.968247 | 0.002995 | 0.023094 |
| RBM22    | 1296.571 | 0.332786 | 0.112198 | 2.966058 | 0.003016 | 0.023201 |
| TRIM14   | 512.6973 | 0.510899 | 0.172307 | 2.965053 | 0.003026 | 0.023265 |
| MAN1A1   | 168.5774 | 0.564326 | 0.190499 | 2.96236  | 0.003053 | 0.023458 |
| VCAM1    | 1621.364 | 0.746324 | 0.252127 | 2.960108 | 0.003075 | 0.023607 |
| IPO9     | 4504.134 | 0.372448 | 0.125867 | 2.959057 | 0.003086 | 0.023664 |
| SKIV2L2  | 3795.305 | 0.396868 | 0.134144 | 2.958509 | 0.003091 | 0.023683 |
| RIOK1    | 519.2671 | 0.460428 | 0.155668 | 2.957765 | 0.003099 | 0.023716 |
| idh1     | 4968.834 | 0.320703 | 0.10846  | 2.956893 | 0.003108 | 0.023754 |
| MTMR12   | 981.5602 | 0.41526  | 0.140431 | 2.957027 | 0.003106 | 0.023754 |
| PHLPP2   | 1117.382 | 0.416631 | 0.141013 | 2.954555 | 0.003131 | 0.023893 |
| POLR3B   | 291.549  | 0.679598 | 0.230041 | 2.954244 | 0.003134 | 0.023906 |
| STAU2    | 1319.501 | 0.392389 | 0.132901 | 2.952497 | 0.003152 | 0.024018 |
| PPP6C    | 1838.422 | 0.340272 | 0.115292 | 2.951385 | 0.003164 | 0.024092 |
| NDUFB5   | 1770.264 | 0.356398 | 0.120818 | 2.949881 | 0.003179 | 0.024198 |
| PSMC2    | 2964.712 | 0.348151 | 0.118169 | 2.946199 | 0.003217 | 0.024452 |
| SNAPC5   | 209.183  | 0.512504 | 0.173966 | 2.945997 | 0.003219 | 0.024456 |
| CDC23    | 2151.119 | 0.338339 | 0.114897 | 2.944724 | 0.003232 | 0.024532 |
| KIF11    | 4137.12  | 0.449878 | 0.152886 | 2.942581 | 0.003255 | 0.024691 |
| SNHG3    | 1801.92  | 0.360994 | 0.122716 | 2.941703 | 0.003264 | 0.024737 |
| NUP155   | 3588.437 | 0.449899 | 0.153104 | 2.938524 | 0.003298 | 0.02493  |
| KPNB1    | 11646.48 | 0.309984 | 0.105531 | 2.937366 | 0.00331  | 0.024987 |
| KIAA0586 | 742.3005 | 0.415213 | 0.141459 | 2.935217 | 0.003333 | 0.025124 |
| SERBP1   | 8593.328 | 0.362733 | 0.123625 | 2.934145 | 0.003345 | 0.025186 |
| MTMR6    | 2491.153 | 0.375659 | 0.128089 | 2.932788 | 0.003359 | 0.025272 |
| PCGF6    | 248.5074 | 0.491751 | 0.167725 | 2.931891 | 0.003369 | 0.02531  |
| HNRNPA1  | 5391.71  | 0.302858 | 0.103325 | 2.931128 | 0.003377 | 0.025346 |
| YEATS4   | 234.464  | 0.528969 | 0.180613 | 2.928739 | 0.003403 | 0.025455 |

|          |          |          |          |          |          |          |
|----------|----------|----------|----------|----------|----------|----------|
| NUSAP1   | 4510.868 | 0.337046 | 0.115089 | 2.928566 | 0.003405 | 0.025456 |
| NUP210L  | 54.99444 | 0.88226  | 0.301291 | 2.928267 | 0.003409 | 0.025456 |
| RBM27    | 3003.176 | 0.357241 | 0.122049 | 2.927027 | 0.003422 | 0.025509 |
| MPC1     | 327.1773 | 0.450617 | 0.153946 | 2.927108 | 0.003421 | 0.025509 |
| COMMD8   | 351.3324 | 0.460602 | 0.157372 | 2.926841 | 0.003424 | 0.025512 |
| RTCB     | 2569.975 | 0.314647 | 0.107511 | 2.926641 | 0.003426 | 0.025513 |
| PPP2CA   | 4417.275 | 0.370116 | 0.12648  | 2.926281 | 0.00343  | 0.025521 |
| ECT2     | 4523.649 | 0.38024  | 0.129961 | 2.925803 | 0.003436 | 0.025548 |
| LRR1     | 286.112  | 0.479593 | 0.164008 | 2.924204 | 0.003453 | 0.025667 |
| rnu11    | 70.84642 | 0.817897 | 0.279746 | 2.923717 | 0.003459 | 0.025695 |
| IDE      | 2130.315 | 0.397074 | 0.135856 | 2.922754 | 0.00347  | 0.025749 |
| ZNF100   | 555.3233 | 0.516159 | 0.176629 | 2.922276 | 0.003475 | 0.025764 |
| NSUN2    | 2446.757 | 0.334262 | 0.114489 | 2.919611 | 0.003505 | 0.025948 |
| MRPS10   | 1779.421 | 0.424131 | 0.145264 | 2.91973  | 0.003503 | 0.025948 |
| RAD51B   | 142.8861 | 0.652481 | 0.223475 | 2.919701 | 0.003504 | 0.025948 |
| ZNF43    | 589.9655 | 0.54426  | 0.186523 | 2.917922 | 0.003524 | 0.026077 |
| ASUN     | 1301.224 | 0.394946 | 0.135373 | 2.917457 | 0.003529 | 0.026103 |
| DHX15    | 4569.276 | 0.346105 | 0.118667 | 2.916602 | 0.003539 | 0.026137 |
| METTL7A  | 263.2332 | 0.502283 | 0.172232 | 2.91632  | 0.003542 | 0.026148 |
| SMARCC1  | 4727.938 | 0.336692 | 0.115508 | 2.914889 | 0.003558 | 0.026256 |
| PRIM2    | 674.4287 | 0.557811 | 0.191487 | 2.91305  | 0.003579 | 0.026348 |
| BEND3    | 132.6073 | 0.578005 | 0.198472 | 2.912278 | 0.003588 | 0.026388 |
| SNORD24  | 18.30244 | 1.376162 | 0.472748 | 2.910985 | 0.003603 | 0.026447 |
| ATP6V1C1 | 2929.496 | 0.343746 | 0.118153 | 2.909328 | 0.003622 | 0.02655  |
| MRE11    | 2124.327 | 0.436619 | 0.150154 | 2.907811 | 0.00364  | 0.026654 |
| NR1D2    | 2325.249 | 0.386756 | 0.133022 | 2.907463 | 0.003644 | 0.026671 |
| PPA2     | 1144.655 | 0.449887 | 0.154759 | 2.907019 | 0.003649 | 0.026696 |
| FAM133D  | 1000.927 | 0.430181 | 0.148005 | 2.906518 | 0.003655 | 0.026726 |
| RBM25    | 2197.593 | 0.36435  | 0.125366 | 2.906294 | 0.003657 | 0.026729 |
| mettl2a  | 656.0849 | 0.379243 | 0.130504 | 2.905984 | 0.003661 | 0.026734 |
| CDCA7L   | 1673.458 | 0.374561 | 0.128954 | 2.904614 | 0.003677 | 0.026801 |
| SNORD18E | 23.83366 | 1.39899  | 0.48181  | 2.903612 | 0.003689 | 0.026873 |
| FASTKD1  | 775.7978 | 0.473409 | 0.163233 | 2.900198 | 0.003729 | 0.027091 |
| ABCD3    | 3515.092 | 0.375958 | 0.129657 | 2.89964  | 0.003736 | 0.027101 |
| CUL2     | 1203.649 | 0.388967 | 0.134141 | 2.899678 | 0.003735 | 0.027101 |
| fancm    | 430.8747 | 0.600776 | 0.207175 | 2.899851 | 0.003733 | 0.027101 |
| TRAF3IP1 | 554.1542 | 0.376611 | 0.129888 | 2.899491 | 0.003738 | 0.027101 |
| GPRIN1   | 398.8723 | 0.496395 | 0.171225 | 2.899077 | 0.003743 | 0.027112 |
| CAAP1    | 423.309  | 0.44111  | 0.152194 | 2.89833  | 0.003752 | 0.027151 |
| SNX19    | 2689.245 | 0.301244 | 0.104001 | 2.896553 | 0.003773 | 0.027292 |
| ZFP91    | 3706.593 | 0.339316 | 0.117172 | 2.895873 | 0.003781 | 0.027331 |
| RRP36    | 1304.871 | 0.320419 | 0.11069  | 2.894758 | 0.003795 | 0.027398 |
| ELOVL6   | 520.852  | 0.536884 | 0.185492 | 2.894383 | 0.003799 | 0.027417 |
| KIAA1841 | 444.6825 | 0.437017 | 0.151103 | 2.892174 | 0.003826 | 0.027547 |
| CD83     | 62.43496 | 0.758118 | 0.262153 | 2.891895 | 0.003829 | 0.027558 |
| KIF24    | 520.3521 | 0.443604 | 0.153412 | 2.891586 | 0.003833 | 0.027571 |
| HADH     | 913.9854 | 0.337624 | 0.116939 | 2.887187 | 0.003887 | 0.027883 |



|         |          |          |          |          |          |          |
|---------|----------|----------|----------|----------|----------|----------|
| MDH1    | 3321.048 | 0.295575 | 0.102395 | 2.886632 | 0.003894 | 0.027903 |
| RHOT1   | 1623.851 | 0.36921  | 0.127909 | 2.886517 | 0.003895 | 0.027903 |
| CDK8    | 511.7165 | 0.397038 | 0.137557 | 2.886359 | 0.003897 | 0.027905 |
| FAM175B | 642.3161 | 0.360688 | 0.124986 | 2.885819 | 0.003904 | 0.027936 |
| EPC2    | 653.9727 | 0.377114 | 0.130696 | 2.885431 | 0.003909 | 0.027948 |
| NUDT5   | 904.1083 | 0.340087 | 0.117965 | 2.88295  | 0.00394  | 0.028143 |
| mocs2   | 805.7082 | 0.35576  | 0.123409 | 2.882776 | 0.003942 | 0.028146 |
| BUB1B   | 2342.654 | 0.473628 | 0.164354 | 2.881757 | 0.003955 | 0.028201 |
| PRC1    | 7083.219 | 0.316727 | 0.109984 | 2.879768 | 0.00398  | 0.028314 |
| ATP5C1  | 3283.355 | 0.352816 | 0.122601 | 2.877753 | 0.004005 | 0.028363 |
| PSMG2   | 721.9869 | 0.402228 | 0.139756 | 2.878069 | 0.004001 | 0.028363 |
| QTRT2   | 1082.978 | 0.404937 | 0.140687 | 2.878274 | 0.003999 | 0.028363 |
| VPS33A  | 387.5134 | 0.418937 | 0.145532 | 2.878647 | 0.003994 | 0.028363 |
| JUN     | 3150.272 | 0.459753 | 0.159722 | 2.878459 | 0.003996 | 0.028363 |
| MICU2   | 1092.847 | 0.485901 | 0.168849 | 2.87773  | 0.004005 | 0.028363 |
| TMEM133 | 248.0529 | 0.497009 | 0.172705 | 2.877793 | 0.004005 | 0.028363 |
| CGRRF1  | 108.5295 | 0.633454 | 0.220026 | 2.878993 | 0.003989 | 0.028363 |
| CLGN    | 30.83314 | 1.169671 | 0.406444 | 2.877813 | 0.004004 | 0.028363 |
| KNTC1   | 4970.637 | 0.412467 | 0.143377 | 2.876798 | 0.004017 | 0.028421 |
| SLTM    | 2297.842 | 0.343933 | 0.119666 | 2.87411  | 0.004052 | 0.028625 |
| PRKDC   | 25452.4  | 0.440361 | 0.153285 | 2.872822 | 0.004068 | 0.028716 |
| MAGEE1  | 208.0793 | 0.480656 | 0.16736  | 2.871984 | 0.004079 | 0.028766 |
| KLHL8   | 807.8922 | 0.395029 | 0.137566 | 2.871559 | 0.004085 | 0.028791 |
| TGS1    | 1258.678 | 0.405215 | 0.141273 | 2.868317 | 0.004127 | 0.029048 |
| PHF5A   | 890.473  | 0.345113 | 0.12033  | 2.868039 | 0.00413  | 0.02906  |
| KIF2A   | 2236.136 | 0.3954   | 0.137876 | 2.86779  | 0.004134 | 0.029067 |
| U2SURP  | 5889.019 | 0.419282 | 0.146386 | 2.864227 | 0.00418  | 0.029306 |
| PLEKHS1 | 40.77    | 1.17779  | 0.411195 | 2.864311 | 0.004179 | 0.029306 |
| WDR12   | 825.3699 | 0.386024 | 0.134795 | 2.863792 | 0.004186 | 0.029319 |
| ISCU    | 705.5128 | 0.369165 | 0.128932 | 2.863241 | 0.004193 | 0.029342 |
| SPDL1   | 1595.2   | 0.528265 | 0.184491 | 2.863358 | 0.004192 | 0.029342 |
| NIFK    | 953.1815 | 0.399209 | 0.13945  | 2.862742 | 0.0042   | 0.029363 |
| NAA20   | 1417.888 | 0.334647 | 0.116927 | 2.862021 | 0.004209 | 0.029404 |
| FAXC    | 115.1528 | 0.602488 | 0.210549 | 2.861514 | 0.004216 | 0.029437 |
| Mdn1    | 3915.764 | 0.380928 | 0.13317  | 2.860466 | 0.00423  | 0.029521 |
| STRIP1  | 881.9725 | 0.357492 | 0.125008 | 2.859752 | 0.00424  | 0.029575 |
| AHCTF1  | 3977.516 | 0.415316 | 0.145255 | 2.859215 | 0.004247 | 0.029598 |
| SUCLA2  | 1852.821 | 0.3519   | 0.123094 | 2.85878  | 0.004253 | 0.029617 |
| PDE7A   | 1340.96  | 0.40721  | 0.142465 | 2.858304 | 0.004259 | 0.029643 |
| POP4    | 552.6051 | 0.37084  | 0.12975  | 2.858112 | 0.004262 | 0.029648 |
| TAF5    | 284.0446 | 0.537636 | 0.188174 | 2.857112 | 0.004275 | 0.029728 |
| gbp1    | 829.3934 | 0.429598 | 0.150398 | 2.856397 | 0.004285 | 0.029781 |
| AKR1C3  | 11916    | 0.523841 | 0.183454 | 2.855432 | 0.004298 | 0.029859 |
| Uqcrh   | 4795.147 | 0.292356 | 0.102402 | 2.854968 | 0.004304 | 0.029889 |
| AURKA   | 3880.39  | 0.339583 | 0.11898  | 2.854114 | 0.004316 | 0.029956 |
| FDXACB1 | 189.0455 | 0.480217 | 0.168308 | 2.853202 | 0.004328 | 0.030028 |
| RAB10   | 4657.455 | 0.351209 | 0.123148 | 2.851925 | 0.004346 | 0.030132 |

|          |          |          |          |          |          |          |
|----------|----------|----------|----------|----------|----------|----------|
| THOC7    | 1300.776 | 0.353817 | 0.124088 | 2.851332 | 0.004354 | 0.030151 |
| MRAS     | 527.1031 | 0.389216 | 0.136532 | 2.850738 | 0.004362 | 0.030163 |
| DNAJC6   | 237.5493 | 0.488216 | 0.171266 | 2.850634 | 0.004363 | 0.030163 |
| IL7R     | 346.4588 | 0.766453 | 0.268843 | 2.850934 | 0.004359 | 0.030163 |
| CRNKL1   | 1840.415 | 0.342899 | 0.120477 | 2.84618  | 0.004425 | 0.030507 |
| FAM136A  | 1080.506 | 0.361662 | 0.127054 | 2.84653  | 0.00442  | 0.030507 |
| SOBP     | 319.8569 | 0.514981 | 0.18092  | 2.846454 | 0.004421 | 0.030507 |
| HDAC2    | 2456.041 | 0.397813 | 0.139793 | 2.845734 | 0.004431 | 0.030536 |
| CALM1    | 2531.956 | 0.358507 | 0.126012 | 2.845019 | 0.004441 | 0.030577 |
| NDUFA6   | 2203.181 | 0.314909 | 0.110718 | 2.844241 | 0.004452 | 0.030611 |
| BRD8     | 2265.481 | 0.312311 | 0.109829 | 2.843607 | 0.004461 | 0.030658 |
| SERAC1   | 345.0324 | 0.575522 | 0.202516 | 2.841855 | 0.004485 | 0.030772 |
| ZNF664   | 1974.079 | 0.341524 | 0.1202   | 2.841299 | 0.004493 | 0.030807 |
| NDUFA12  | 836.1491 | 0.369008 | 0.129894 | 2.840848 | 0.004499 | 0.030829 |
| AFG3L1P  | 377.0807 | 0.407127 | 0.143402 | 2.83907  | 0.004525 | 0.030973 |
| KLHL2    | 700.991  | 0.401985 | 0.141714 | 2.836596 | 0.00456  | 0.031132 |
| CCDC66   | 514.74   | 0.477534 | 0.168343 | 2.836674 | 0.004559 | 0.031132 |
| WASF3    | 186.765  | 0.553398 | 0.195129 | 2.83607  | 0.004567 | 0.031169 |
| POMP     | 2987.636 | 0.371248 | 0.131038 | 2.833126 | 0.00461  | 0.031444 |
| CHAC2    | 67.69396 | 0.927177 | 0.32729  | 2.832894 | 0.004613 | 0.031453 |
| ASAH1    | 912.8038 | 0.377341 | 0.133247 | 2.831885 | 0.004627 | 0.031538 |
| ATMIN    | 1595.317 | 0.325601 | 0.114985 | 2.831681 | 0.00463  | 0.031544 |
| DSEL     | 909.0731 | 0.371715 | 0.131325 | 2.830503 | 0.004647 | 0.031619 |
| MAPKAPK1 | 897.4782 | 0.327587 | 0.115789 | 2.829166 | 0.004667 | 0.031708 |
| HDCC2    | 819.1115 | 0.34264  | 0.121115 | 2.82904  | 0.004669 | 0.031708 |
| EID2     | 224.9056 | 0.505341 | 0.178618 | 2.829166 | 0.004667 | 0.031708 |
| WDR75    | 1279.985 | 0.388168 | 0.1373   | 2.827154 | 0.004696 | 0.031839 |
| PFDN4    | 843.1044 | 0.468977 | 0.165901 | 2.826847 | 0.004701 | 0.031856 |
| NEMP1    | 2433.24  | 0.358933 | 0.126992 | 2.826415 | 0.004707 | 0.031885 |
| DHX29    | 2310.137 | 0.377296 | 0.133728 | 2.821368 | 0.004782 | 0.032297 |
| FAM49B   | 1883.533 | 0.375729 | 0.133214 | 2.820489 | 0.004795 | 0.032352 |
| TMEM138  | 647.0592 | 0.367202 | 0.130498 | 2.813856 | 0.004895 | 0.032926 |
| OGFRL1   | 272.9856 | 0.474888 | 0.168949 | 2.810842 | 0.004941 | 0.033193 |
| NSUN6    | 299.2595 | 0.515739 | 0.183505 | 2.810498 | 0.004946 | 0.033214 |
| NCOA5    | 591.2344 | 0.430387 | 0.153178 | 2.809714 | 0.004959 | 0.033266 |
| METTL14  | 603.6312 | 0.405929 | 0.144483 | 2.809526 | 0.004961 | 0.033271 |
| PEX1     | 1616.204 | 0.380214 | 0.135366 | 2.808788 | 0.004973 | 0.033333 |
| CASP6    | 235.1044 | 0.480791 | 0.171202 | 2.808325 | 0.00498  | 0.033366 |
| FBXO22   | 627.2161 | 0.386215 | 0.137583 | 2.807145 | 0.004998 | 0.033474 |
| GEN1     | 820.4946 | 0.592261 | 0.211009 | 2.806811 | 0.005003 | 0.033476 |
| SLC25A3  | 6936.451 | 0.296727 | 0.10577  | 2.805389 | 0.005026 | 0.033555 |
| SLC46A3  | 568.1591 | 0.437382 | 0.155941 | 2.804799 | 0.005035 | 0.0336   |
| TBCA     | 1742.155 | 0.325831 | 0.116184 | 2.804446 | 0.00504  | 0.03361  |
| NFIB     | 583.6698 | 0.423262 | 0.150953 | 2.803939 | 0.005048 | 0.033646 |
| DDX58    | 272.2034 | 0.546107 | 0.19484  | 2.802851 | 0.005065 | 0.033733 |
| RWDD4    | 630.7171 | 0.481453 | 0.171866 | 2.801329 | 0.005089 | 0.033849 |
| GLDN     | 2002.877 | 0.417909 | 0.149427 | 2.796751 | 0.005162 | 0.034269 |

|          |          |          |          |          |          |          |
|----------|----------|----------|----------|----------|----------|----------|
| MAP2K6   | 155.4098 | 0.669634 | 0.239454 | 2.796508 | 0.005166 | 0.034269 |
| COP55    | 1587.849 | 0.315049 | 0.112692 | 2.795663 | 0.005179 | 0.034309 |
| HMG2N    | 6416.419 | 0.341032 | 0.121989 | 2.795595 | 0.00518  | 0.034309 |
| FAM89A   | 194.9435 | 0.514244 | 0.183949 | 2.795577 | 0.005181 | 0.034309 |
| UBE2W    | 1308.441 | 0.389    | 0.139185 | 2.794837 | 0.005193 | 0.034358 |
| PRPF40A  | 5325.919 | 0.383623 | 0.137293 | 2.794199 | 0.005203 | 0.034397 |
| SPTA1    | 27.37705 | 1.118803 | 0.400384 | 2.794323 | 0.005201 | 0.034397 |
| FAM196A  | 98.78693 | 0.639799 | 0.229132 | 2.792275 | 0.005234 | 0.034543 |
| IPO11    | 1864.68  | 0.392422 | 0.140572 | 2.791611 | 0.005245 | 0.034599 |
| NDUFB9   | 1693.392 | 0.329552 | 0.11809  | 2.79068  | 0.00526  | 0.034676 |
| DTD2     | 325.0554 | 0.458702 | 0.164373 | 2.790618 | 0.005261 | 0.034676 |
| PRDX1    | 44072.17 | 0.417055 | 0.149488 | 2.789889 | 0.005273 | 0.034739 |
| DECR1    | 1239.268 | 0.351095 | 0.125963 | 2.787289 | 0.005315 | 0.034989 |
| COBLL1   | 478.0004 | 0.47671  | 0.171125 | 2.785743 | 0.005341 | 0.035111 |
| PAXBP1   | 1887.086 | 0.378448 | 0.135899 | 2.784779 | 0.005356 | 0.035171 |
| SCG2     | 445.1864 | 0.478701 | 0.171895 | 2.784852 | 0.005355 | 0.035171 |
| MRPS17   | 473.5914 | 0.382832 | 0.137522 | 2.783792 | 0.005373 | 0.035248 |
| NRCAM    | 135.6528 | 0.592938 | 0.213058 | 2.782993 | 0.005386 | 0.035305 |
| TRMT12   | 408.5157 | 0.416388 | 0.149686 | 2.781748 | 0.005407 | 0.035381 |
| MIPOL1   | 195.9529 | 0.537721 | 0.193379 | 2.780664 | 0.005425 | 0.035484 |
| znf519   | 553.7815 | 0.50788  | 0.183104 | 2.773716 | 0.005542 | 0.036174 |
| RNASEH2B | 260.4775 | 0.453531 | 0.163696 | 2.770567 | 0.005596 | 0.036464 |
| RPP14    | 570.0994 | 0.364095 | 0.13146  | 2.769614 | 0.005612 | 0.03654  |
| ARPC5L   | 354.3088 | 0.394369 | 0.142442 | 2.768635 | 0.005629 | 0.036595 |
| tmem199  | 346.7141 | 0.417499 | 0.150788 | 2.768775 | 0.005627 | 0.036595 |
| POLE3    | 1316.568 | 0.32037  | 0.115791 | 2.766792 | 0.005661 | 0.036748 |
| C11orf58 | 4169.812 | 0.312881 | 0.113133 | 2.765598 | 0.005682 | 0.036838 |
| MAPRE1   | 4274.991 | 0.353034 | 0.127681 | 2.764982 | 0.005693 | 0.036892 |
| PLXNC1   | 113.1041 | 0.610527 | 0.220922 | 2.763537 | 0.005718 | 0.037009 |
| STRAP    | 2812.067 | 0.339422 | 0.122848 | 2.762954 | 0.005728 | 0.03706  |
| gk       | 267.4256 | 0.495795 | 0.17947  | 2.762549 | 0.005735 | 0.037083 |
| SGPL1    | 1051.372 | 0.317011 | 0.114785 | 2.761782 | 0.005749 | 0.037146 |
| PDP1     | 2481.975 | 0.356197 | 0.129144 | 2.758145 | 0.005813 | 0.037474 |
| MINPP1   | 456.7394 | 0.446246 | 0.161906 | 2.756197 | 0.005848 | 0.037629 |
| Snord45b | 72.09388 | 0.824462 | 0.299277 | 2.754846 | 0.005872 | 0.037722 |
| TMEM33   | 2630.371 | 0.363777 | 0.132088 | 2.75405  | 0.005886 | 0.037798 |
| TUBGCP5  | 743.3037 | 0.412667 | 0.149858 | 2.753714 | 0.005892 | 0.037805 |
| GDE1     | 2152.013 | 0.298242 | 0.108322 | 2.753302 | 0.0059   | 0.037837 |
| NUDT21   | 6662.104 | 0.33254  | 0.12091  | 2.750319 | 0.005954 | 0.038168 |
| SNORD18A | 12.63511 | 1.589018 | 0.577802 | 2.750107 | 0.005958 | 0.038176 |
| TCEB1    | 1215.568 | 0.367241 | 0.133592 | 2.748979 | 0.005978 | 0.038267 |
| ADAM22   | 241.5513 | 0.493451 | 0.179507 | 2.748927 | 0.005979 | 0.038267 |
| LARP4    | 3274.48  | 0.429473 | 0.156251 | 2.748605 | 0.005985 | 0.038272 |
| SLC36A1  | 259.3451 | 0.468646 | 0.170522 | 2.748305 | 0.00599  | 0.038292 |
| PLS1     | 104.7633 | 0.804766 | 0.292927 | 2.747322 | 0.006008 | 0.038359 |
| YWHAH    | 2590.442 | 0.336291 | 0.122429 | 2.746823 | 0.006018 | 0.038386 |
| METAP2   | 2452.902 | 0.348328 | 0.12682  | 2.746639 | 0.006021 | 0.038391 |

|          |          |          |          |          |          |          |
|----------|----------|----------|----------|----------|----------|----------|
| ISOC1    | 613.0923 | 0.341943 | 0.124505 | 2.746431 | 0.006025 | 0.0384   |
| TPR      | 8244.838 | 0.366582 | 0.1335   | 2.745923 | 0.006034 | 0.038443 |
| WDCP     | 416.8933 | 0.402749 | 0.146751 | 2.744438 | 0.006061 | 0.038554 |
| ZC3H13   | 2132.125 | 0.328404 | 0.119701 | 2.743542 | 0.006078 | 0.038644 |
| TOR1A    | 634.1079 | 0.345205 | 0.125834 | 2.743339 | 0.006082 | 0.038651 |
| BLOC1S2  | 332.4151 | 0.41376  | 0.15091  | 2.741761 | 0.006111 | 0.038806 |
| DHX35    | 818.6343 | 0.342588 | 0.12505  | 2.739599 | 0.006151 | 0.039014 |
| SLC5A6   | 395.7807 | 0.492965 | 0.179973 | 2.739108 | 0.006161 | 0.039045 |
| SRP19    | 943.8903 | 0.379296 | 0.138554 | 2.737541 | 0.00619  | 0.039197 |
| PM20D2   | 486.8651 | 0.451775 | 0.165039 | 2.737384 | 0.006193 | 0.039197 |
| PAX6     | 141.7695 | 0.620498 | 0.226673 | 2.737417 | 0.006192 | 0.039197 |
| THAP9    | 201.7719 | 0.536672 | 0.196068 | 2.737173 | 0.006197 | 0.039206 |
| TMEM183  | 1174.874 | 0.306653 | 0.112051 | 2.736741 | 0.006205 | 0.039224 |
| HLTF     | 7702.671 | 0.341283 | 0.12471  | 2.736617 | 0.006207 | 0.039224 |
| SMC2     | 2517.916 | 0.422901 | 0.154562 | 2.736124 | 0.006217 | 0.039251 |
| CDKN2AIP | 449.3265 | 0.407451 | 0.149128 | 2.73223  | 0.006291 | 0.039596 |
| EFNA5    | 101.071  | 0.667306 | 0.244241 | 2.732167 | 0.006292 | 0.039596 |
| MRPL50   | 426.321  | 0.423633 | 0.155123 | 2.730955 | 0.006315 | 0.039677 |
| GMFB     | 1706.714 | 0.378927 | 0.13881  | 2.729825 | 0.006337 | 0.039778 |
| SELENOT  | 2024.578 | 0.33469  | 0.122692 | 2.727877 | 0.006374 | 0.039968 |
| PCMTD2   | 1429.209 | 0.307799 | 0.112846 | 2.727596 | 0.00638  | 0.039969 |
| PUS7     | 1187.981 | 0.392005 | 0.143732 | 2.727327 | 0.006385 | 0.039973 |
| ITGA4    | 851.0354 | 0.424727 | 0.155761 | 2.726787 | 0.006395 | 0.040019 |
| MEAF6    | 826.8251 | 0.321536 | 0.117955 | 2.725913 | 0.006412 | 0.040109 |
| EED      | 716.2981 | 0.378968 | 0.139043 | 2.725537 | 0.00642  | 0.040137 |
| LMO7     | 3426.463 | 0.337977 | 0.124029 | 2.724987 | 0.00643  | 0.040157 |
| PMPCB    | 1658.816 | 0.348493 | 0.128082 | 2.720866 | 0.006511 | 0.040562 |
| YES1     | 2914.024 | 0.34868  | 0.128148 | 2.720922 | 0.00651  | 0.040562 |
| MCM3AP   | 145.4778 | 0.521173 | 0.191535 | 2.721034 | 0.006508 | 0.040562 |
| DDX18    | 2856.2   | 0.354279 | 0.13034  | 2.718113 | 0.006566 | 0.040835 |
| DERA     | 900.5602 | 0.355854 | 0.131066 | 2.715079 | 0.006626 | 0.041155 |
| rab9b    | 143.9169 | 0.562909 | 0.20747  | 2.713209 | 0.006664 | 0.041358 |
| LBHD1    | 661.4002 | 0.356188 | 0.131312 | 2.712529 | 0.006677 | 0.041413 |
| LOC64664 | 83.49971 | 0.681097 | 0.251183 | 2.711556 | 0.006697 | 0.041484 |
| ANAPC4   | 640.0625 | 0.394039 | 0.145352 | 2.710933 | 0.006709 | 0.041546 |
| PSMD7    | 1184.206 | 0.328065 | 0.121037 | 2.710457 | 0.006719 | 0.041589 |
| UBXN2A   | 497.9749 | 0.395279 | 0.145855 | 2.710084 | 0.006727 | 0.041602 |
| SLC25A40 | 1383.144 | 0.382804 | 0.141297 | 2.70922  | 0.006744 | 0.041694 |
| NUP37    | 825.4159 | 0.364789 | 0.134729 | 2.70757  | 0.006778 | 0.041851 |
| CKS1B    | 1736.587 | 0.304661 | 0.11255  | 2.706898 | 0.006792 | 0.041903 |
| POLR3K   | 170.391  | 0.504051 | 0.186273 | 2.705972 | 0.00681  | 0.041962 |
| CDC40    | 985.9923 | 0.368422 | 0.136248 | 2.70406  | 0.00685  | 0.042144 |
| ASF1B    | 764.7088 | 0.430307 | 0.159145 | 2.703866 | 0.006854 | 0.042152 |
| ASPM     | 10552.33 | 0.461272 | 0.170875 | 2.699468 | 0.006945 | 0.042629 |
| BTBD10   | 830.425  | 0.365585 | 0.135571 | 2.696634 | 0.007004 | 0.042881 |
| MBLAC2   | 392.5919 | 0.416487 | 0.154536 | 2.695077 | 0.007037 | 0.042992 |
| ZNF90    | 206.0396 | 0.689086 | 0.255685 | 2.695055 | 0.007038 | 0.042992 |

|           |          |          |          |          |          |          |
|-----------|----------|----------|----------|----------|----------|----------|
| EIF2S2    | 5390.987 | 0.328477 | 0.121983 | 2.692813 | 0.007085 | 0.043197 |
| MCCC2     | 1675.768 | 0.343905 | 0.127746 | 2.692105 | 0.0071   | 0.04327  |
| TRPM7     | 3661.231 | 0.37688  | 0.140128 | 2.689549 | 0.007155 | 0.043484 |
| CNTLN     | 723.102  | 0.486697 | 0.180994 | 2.689019 | 0.007166 | 0.043536 |
| C2orf69   | 793.6813 | 0.408029 | 0.151838 | 2.687264 | 0.007204 | 0.043731 |
| B3GNT2    | 797.7341 | 0.363273 | 0.135213 | 2.686663 | 0.007217 | 0.043793 |
| KATNA1    | 382.1901 | 0.40446  | 0.150619 | 2.685328 | 0.007246 | 0.043916 |
| FRAT1     | 45.92993 | 0.911378 | 0.339534 | 2.684198 | 0.00727  | 0.04403  |
| CHN1      | 325.0982 | 0.418732 | 0.156108 | 2.682324 | 0.007311 | 0.044191 |
| SMARCE1   | 3937.441 | 0.274575 | 0.102421 | 2.680854 | 0.007343 | 0.044368 |
| VPS36     | 1967.209 | 0.330768 | 0.123439 | 2.679606 | 0.007371 | 0.044469 |
| COIL      | 623.3066 | 0.346694 | 0.129379 | 2.679682 | 0.007369 | 0.044469 |
| EOGT      | 440.157  | 0.42977  | 0.160543 | 2.676979 | 0.007429 | 0.044797 |
| REPS1     | 705.5516 | 0.335854 | 0.125517 | 2.675757 | 0.007456 | 0.044908 |
| GPRASP2   | 371.3383 | 0.41394  | 0.154742 | 2.675038 | 0.007472 | 0.044934 |
| PIGW      | 417.5852 | 0.452402 | 0.169112 | 2.675157 | 0.007469 | 0.044934 |
| ZNF678    | 555.4275 | 0.474416 | 0.177327 | 2.67537  | 0.007465 | 0.044934 |
| RBM45     | 508.0386 | 0.386999 | 0.144713 | 2.674252 | 0.00749  | 0.045022 |
| ZNF829    | 207.7593 | 0.447972 | 0.16755  | 2.673668 | 0.007503 | 0.045066 |
| POLR1A    | 1215.931 | 0.360783 | 0.134983 | 2.672808 | 0.007522 | 0.045129 |
| ANP32E    | 2277.239 | 0.371556 | 0.13901  | 2.672872 | 0.007521 | 0.045129 |
| RPL7      | 5376.133 | 0.302299 | 0.113125 | 2.672257 | 0.007534 | 0.045159 |
| B3GLCT    | 512.3824 | 0.442069 | 0.165437 | 2.672134 | 0.007537 | 0.045159 |
| ZC4H2     | 279.7844 | 0.453599 | 0.169756 | 2.672062 | 0.007539 | 0.045159 |
| RP9       | 345.0332 | 0.402263 | 0.15056  | 2.67177  | 0.007545 | 0.045181 |
| PRC1-AS1  | 55.60527 | 0.755554 | 0.282826 | 2.671445 | 0.007553 | 0.045192 |
| TIMM8B    | 488.2993 | 0.43415  | 0.162594 | 2.670154 | 0.007582 | 0.045306 |
| BRI3BP    | 135.8881 | 0.54815  | 0.205315 | 2.669798 | 0.00759  | 0.045306 |
| HDHD2     | 664.691  | 0.357824 | 0.134056 | 2.669208 | 0.007603 | 0.045368 |
| MRPS36    | 564.8789 | 0.387362 | 0.145205 | 2.667692 | 0.007637 | 0.045486 |
| STK32B    | 700.3926 | 0.335126 | 0.125702 | 2.666038 | 0.007675 | 0.045597 |
| SYNM      | 487.1781 | 0.362486 | 0.135973 | 2.665875 | 0.007679 | 0.045597 |
| ZDHHC23   | 203.0162 | 0.467083 | 0.175218 | 2.665726 | 0.007682 | 0.045597 |
| ORC3      | 964.9702 | 0.370333 | 0.139008 | 2.664109 | 0.007719 | 0.045762 |
| NUP50-AS  | 129.8962 | 0.546804 | 0.205362 | 2.662633 | 0.007753 | 0.04591  |
| WTAP      | 1259.539 | 0.338939 | 0.127328 | 2.661935 | 0.007769 | 0.04596  |
| UBE2F     | 577.7182 | 0.35425  | 0.133074 | 2.662059 | 0.007766 | 0.04596  |
| SMARCA5   | 3571.188 | 0.365138 | 0.137173 | 2.661874 | 0.007771 | 0.04596  |
| RIDA      | 500.892  | 0.364135 | 0.136848 | 2.660868 | 0.007794 | 0.046027 |
| PPM1E     | 92.64147 | 0.782423 | 0.294041 | 2.660934 | 0.007792 | 0.046027 |
| TPP2      | 4301.865 | 0.349567 | 0.131474 | 2.658836 | 0.007841 | 0.046253 |
| TSC22D1   | 3604.874 | 0.371804 | 0.13987  | 2.658216 | 0.007856 | 0.04632  |
| tap2      | 1013.534 | 0.366138 | 0.137802 | 2.656982 | 0.007884 | 0.046426 |
| TDP2      | 2877.338 | 0.463439 | 0.174462 | 2.656385 | 0.007898 | 0.046466 |
| C9orf40   | 251.4866 | 0.478726 | 0.180257 | 2.655797 | 0.007912 | 0.046512 |
| UFD1L     | 877.3817 | 0.423618 | 0.159516 | 2.655655 | 0.007915 | 0.046513 |
| LINC00672 | 60.13062 | 0.808529 | 0.3045   | 2.655269 | 0.007925 | 0.046549 |

|           |          |          |          |          |          |          |
|-----------|----------|----------|----------|----------|----------|----------|
| HARS2     | 1827.763 | 0.294094 | 0.110819 | 2.653814 | 0.007959 | 0.046732 |
| MEMO1     | 432.6844 | 0.399225 | 0.150447 | 2.653589 | 0.007964 | 0.046734 |
| POLR3F    | 555.2328 | 0.379307 | 0.142965 | 2.653154 | 0.007974 | 0.046741 |
| DHX57     | 991.2286 | 0.355756 | 0.134118 | 2.652564 | 0.007988 | 0.046799 |
| CCT7      | 6497.779 | 0.286432 | 0.107991 | 2.652377 | 0.007993 | 0.046807 |
| MORF4     | 30.26671 | 1.025943 | 0.386861 | 2.651967 | 0.008002 | 0.046846 |
| ACSL4     | 6597.908 | 0.309433 | 0.116706 | 2.651397 | 0.008016 | 0.046908 |
| RPS6KA5   | 165.2251 | 0.569485 | 0.215052 | 2.648123 | 0.008094 | 0.047257 |
| ENDOD1    | 448.9064 | 0.411215 | 0.15539  | 2.646348 | 0.008137 | 0.047452 |
| DUSP6     | 109.2401 | 0.571072 | 0.215899 | 2.64509  | 0.008167 | 0.047611 |
| PGBD1     | 400.9516 | 0.385252 | 0.145713 | 2.643921 | 0.008195 | 0.047721 |
| RANBP2    | 7744.804 | 0.376915 | 0.142599 | 2.643184 | 0.008213 | 0.047807 |
| BOLA3     | 268.8019 | 0.485575 | 0.183728 | 2.642908 | 0.00822  | 0.047828 |
| SLC9A6    | 1087.482 | 0.318984 | 0.12081  | 2.640381 | 0.008281 | 0.048132 |
| PRPH      | 89.19275 | 0.612314 | 0.231902 | 2.640395 | 0.008281 | 0.048132 |
| ACER3     | 875.6053 | 0.429604 | 0.162721 | 2.640124 | 0.008288 | 0.048132 |
| LINC00167 | 26.12816 | 1.024478 | 0.388029 | 2.640207 | 0.008286 | 0.048132 |
| HJURP     | 4796.988 | 0.268167 | 0.101584 | 2.639843 | 0.008294 | 0.048154 |
| FDX1      | 531.7038 | 0.475387 | 0.18054  | 2.63314  | 0.00846  | 0.048912 |
| TIMM17A   | 2190.307 | 0.298441 | 0.113474 | 2.630049 | 0.008537 | 0.049304 |
| OSGEPL1   | 321.4263 | 0.426627 | 0.16226  | 2.629277 | 0.008557 | 0.04939  |
| E2F8      | 306.6427 | 0.479774 | 0.182664 | 2.626546 | 0.008626 | 0.049721 |
| MTF2      | 1658.928 | 0.415166 | 0.158104 | 2.625894 | 0.008642 | 0.04978  |
| RNF8      | 751.1501 | 0.359281 | 0.136848 | 2.625398 | 0.008655 | 0.049815 |
| SGO1      | 487.4111 | 0.428767 | 0.163311 | 2.625458 | 0.008653 | 0.049815 |
| SPATA5    | 1469.469 | 0.419258 | 0.159781 | 2.623956 | 0.008692 | 0.049989 |
| STON2     | 135.2855 | 0.665949 | 0.253811 | 2.623804 | 0.008695 | 0.049993 |
