# Supplementary material for: RNA Sequencing in Hypoxia-Adapted T98G Glioblastoma Cells Provides Supportive Evidence for IRE1 as a Potential Therapeutic Target
Source: MDPI journal article supplement (doi:10.3390/genes14040841), 2023-03-31
Supplement: s1 [file s1]

Supplementary Table S9. T98G GBM Panther Gene Ontology Cell Components Analysis of DEGS Upregulated in Normoxia

Sorted by P-value.

Analysis Type: PANTHER Overrepresentation Test (Released 20221013)

Annotation Version and Release Date: GO Ontology database DOI: 10.5281/zenodo.6799722 Released 2022-07-01

Analyzed List: upload\_1 (Homo sapiens)

Reference List: Homo sapiens (all genes in database)

Test Type: FISHER

Correction: BONFERRONI

Bonferroni count: 1581

| GO cellular component completeHomo sapiens -      | REFLIST (20589) |      | upload_1 (1340) |   | upload_1 (expected) |          | upload_1 (over/under) | upload_1 (fold Enrichment) | upload_1 (P-value) |
|---------------------------------------------------|-----------------|------|-----------------|---|---------------------|----------|-----------------------|----------------------------|--------------------|
| Unclassified (UNCLASSIFIED)                       | 1640            |      | 37              |   | 106.74              |          | -                     | .35                        | 0.00E00            |
| organelle lumen (GO:0043233)                      | 5614            |      | 707             |   | 365.38              |          | +                     | 1.93                       | 3.55E-77           |
| intracellular organelle lumen (GO:0070013)        | 5614            |      | 707             |   | 365.38              |          | +                     | 1.93                       | 3.55E-77           |
| membrane-enclosed lumen (GO:0031974)              | 5614            |      | 707             |   | 365.38              |          | +                     | 1.93                       | 3.55E-77           |
| nuclear lumen (GO:0031981)                        | 4494            |      | 611             |   | 292.48              |          | +                     | 2.09                       | 1.10E-73           |
| nucleoplasm (GO:0005654)                          | 4130            | 574  | 268.79          | + | 2.14                | 8.70E-71 |                       |                            |                    |
| nucleus (GO:0005634)                              | 7682            | 828  | 499.97          | + | 1.66                | 1.40E-65 |                       |                            |                    |
| intracellular anatomical structure (GO:0005622)   | 14945           | 1234 | 972.67          | + | 1.27                | 2.08E-65 |                       |                            |                    |
| intracellular organelle (GO:0043229)              | 13254           | 1145 | 862.61          | + | 1.33                | 3.87E-60 |                       |                            |                    |
| organelle (GO:0043226)                            | 14064           | 1179 | 915.33          | + | 1.29                | 3.30E-57 |                       |                            |                    |
| intracellular memb-bounded organelle (GO:0043231) | 12154           | 1080 | 791.02          | + | 1.37                | 5.91E-57 |                       |                            |                    |
| membrane-bounded organelle (GO:0043227)           | 13230           | 1128 | 861.05          | + | 1.31                | 7.56E-53 |                       |                            |                    |
| protein-containing complex (GO:0032991)           | 5771            | 616  | 375.60          | + | 1.64                | 3.76E-38 |                       |                            |                    |
| cell periphery (GO:0071944)                       | 6460            | 200  | 420.44          | - | .48                 | 4.08E-38 |                       |                            |                    |
| plasma membrane (GO:0005886)                      | 5977            | 188  | 389.00          | - | .48                 | 4.11E-33 |                       |                            |                    |
| intracell non-memb-bounded organelle (GO:0043232) | 5225            | 556  | 340.06          | + | 1.64                | 3.35E-32 |                       |                            |                    |
| non-membrane-bounded organelle (GO:0043228)       | 5226            | 556  | 340.13          | + | 1.63                | 3.44E-32 |                       |                            |                    |
| nuclear protein-containing complex (GO:0140513)   | 1276            | 216  | 83.05           | + | 2.60                | 5.91E-31 |                       |                            |                    |
| catalytic complex (GO:1902494)                    | 1686            | 253  | 109.73          | + | 2.31                | 1.71E-29 |                       |                            |                    |
| chromosomal region (GO:0098687)                   | 375             | 105  | 24.41           | + | 4.30                | 5.19E-28 |                       |                            |                    |
| chromosome (GO:0005694)                           | 1852            | 257  | 120.53          | + | 2.13                | 3.07E-25 |                       |                            |                    |

|                                                       |       |      |         |   |      |          |
|-------------------------------------------------------|-------|------|---------|---|------|----------|
| mitochondrion (GO:0005739)                            | 1671  | 235  | 108.75  | + | 2.16 | 2.28E-23 |
| cytoplasm (GO:0005737)                                | 12097 | 979  | 787.31  | + | 1.24 | 5.85E-23 |
| envelope (GO:0031975)                                 | 1260  | 194  | 82.00   | + | 2.37 | 1.02E-22 |
| organelle envelope (GO:0031967)                       | 1260  | 194  | 82.00   | + | 2.37 | 1.02E-22 |
| nucleolus (GO:0005730)                                | 1002  | 167  | 65.21   | + | 2.56 | 2.49E-22 |
| cytosol (GO:0005829)                                  | 5458  | 527  | 355.22  | + | 1.48 | 1.16E-19 |
| ribonucleoprotein complex (GO:1990904)                | 714   | 127  | 46.47   | + | 2.73 | 2.07E-18 |
| chromosome, centromeric region (GO:0000775)           | 236   | 68   | 15.36   | + | 4.43 | 6.12E-18 |
| intrinsic component of membrane (GO:0031224)          | 5958  | 239  | 387.77  | - | .62  | 1.46E-16 |
| nuclear chromosome (GO:0000228)                       | 226   | 64   | 14.71   | + | 4.35 | 1.91E-16 |
| condensed chromosome (GO:0000793)                     | 273   | 70   | 17.77   | + | 3.94 | 3.60E-16 |
| integral component of membrane (GO:0016021)           | 5799  | 236  | 377.42  | - | .63  | 4.31E-15 |
| intracellular protein-containing complex (GO:0140535) | 898   | 137  | 58.44   | + | 2.34 | 8.08E-15 |
| mitochondrial matrix (GO:0005759)                     | 486   | 91   | 31.63   | + | 2.88 | 8.53E-14 |
| mitochondrial envelope (GO:0005740)                   | 798   | 121  | 51.94   | + | 2.33 | 1.18E-12 |
| cellular_component (GO:0005575)                       | 18949 | 1303 | 1233.26 | + | 1.06 | 1.14E-11 |
| organelle inner membrane (GO:0019866)                 | 560   | 94   | 36.45   | + | 2.58 | 1.14E-11 |
| condense chr, centromeric region (GO:0000779)         | 173   | 48   | 11.26   | + | 4.26 | 1.39E-11 |
| mitochondrial membrane (GO:0031966)                   | 749   | 113  | 48.75   | + | 2.32 | 1.80E-11 |
| transferase complex (GO:1990234)                      | 847   | 122  | 55.13   | + | 2.21 | 2.43E-11 |
| cellular anatomical entity (GO:0110165)               | 18802 | 1296 | 1223.70 | + | 1.06 | 2.67E-11 |
| mito protein-containing complex (GO:0098798)          | 293   | 62   | 19.07   | + | 3.25 | 8.72E-11 |
| kinetochore (GO:0000776)                              | 163   | 45   | 10.61   | + | 4.24 | 1.11E-10 |
| mitochondrial inner membrane (GO:0005743)             | 497   | 83   | 32.35   | + | 2.57 | 6.37E-10 |
| replication fork (GO:0005657)                         | 65    | 28   | 4.23    | + | 6.62 | 1.19E-09 |
| chromosome, telomeric region (GO:0000781)             | 155   | 42   | 10.09   | + | 4.16 | 1.27E-09 |
| integral component of plasma memb (GO:0005887)        | 1724  | 46   | 112.20  | - | .41  | 2.02E-09 |
| intrinsic component of plasma memb (GO:0031226)       | 1806  | 50   | 117.54  | - | .43  | 2.89E-09 |
| nuclear body (GO:0016604)                             | 833   | 113  | 54.21   | + | 2.08 | 8.21E-09 |

|                                                      |      |     |        |   |       |          |
|------------------------------------------------------|------|-----|--------|---|-------|----------|
| nuclear envelope (GO:0005635)                        | 490  | 76  | 31.89  | + | 2.38  | 1.54E-07 |
| nuclear periphery (GO:0034399)                       | 148  | 35  | 9.63   | + | 3.63  | 2.28E-06 |
| microtubule cytoskeleton (GO:0015630)                | 1374 | 151 | 89.42  | + | 1.69  | 3.73E-06 |
| spindle (GO:0005819)                                 | 428  | 66  | 27.86  | + | 2.37  | 4.52E-06 |
| centrosome (GO:0005813)                              | 634  | 85  | 41.26  | + | 2.06  | 7.19E-06 |
| preribosome (GO:0030684)                             | 78   | 24  | 5.08   | + | 4.73  | 1.29E-05 |
| spliceosomal complex (GO:0005681)                    | 197  | 39  | 12.82  | + | 3.04  | 2.05E-05 |
| cell surface (GO:0009986)                            | 995  | 24  | 64.76  | - | .37   | 2.13E-05 |
| nuclear membrane (GO:0031965)                        | 309  | 51  | 20.11  | + | 2.54  | 3.30E-05 |
| spindle pole (GO:0000922)                            | 173  | 35  | 11.26  | + | 3.11  | 7.09E-05 |
| catalytic step 2 spliceosome (GO:0071013)            | 90   | 24  | 5.86   | + | 4.10  | 1.28E-04 |
| nuclear replication fork (GO:0043596)                | 33   | 15  | 2.15   | + | 6.98  | 1.46E-04 |
| membrane (GO:0016020)                                | 9956 | 547 | 647.97 | - | .84   | 1.46E-04 |
| site of DNA damage (GO:0090734)                      | 107  | 26  | 6.96   | + | 3.73  | 1.81E-04 |
| nuclear matrix (GO:0016363)                          | 126  | 28  | 8.20   | + | 3.41  | 2.97E-04 |
| DNA replication preinitiation complex (GO:0031261)   | 12   | 10  | .78    | + | 12.80 | 3.65E-04 |
| chaperone complex (GO:0101031)                       | 42   | 16  | 2.73   | + | 5.85  | 3.79E-04 |
| fibrillar center (GO:0001650)                        | 145  | 30  | 9.44   | + | 3.18  | 4.21E-04 |
| oxidoreductase complex (GO:1990204)                  | 125  | 27  | 8.14   | + | 3.32  | 7.93E-04 |
| microtubule organizing center (GO:0005815)           | 840  | 96  | 54.67  | + | 1.76  | 9.34E-04 |
| transferase cplex, trans phos-contain s (GO:0061695) | 300  | 46  | 19.52  | + | 2.36  | 1.04E-03 |
| cell junction (GO:0030054)                           | 2136 | 85  | 139.02 | - | .61   | 1.06E-03 |
| CMG complex (GO:0071162)                             | 11   | 9   | .72    | + | 12.57 | 1.66E-03 |
| plasma membrane protein complex (GO:0098797)         | 726  | 17  | 47.25  | - | .36   | 1.67E-03 |
| nuclear pore (GO:0005643)                            | 99   | 23  | 6.44   | + | 3.57  | 1.87E-03 |
| respirasome (GO:0070469)                             | 99   | 23  | 6.44   | + | 3.57  | 1.87E-03 |
| plasma membrane region (GO:0098590)                  | 1257 | 42  | 81.81  | - | .51   | 3.30E-03 |
| Cajal body (GO:0015030)                              | 59   | 17  | 3.84   | + | 4.43  | 4.04E-03 |
| inner mitoc membrane protein complex (GO:0098800)    | 156  | 29  | 10.15  | + | 2.86  | 4.38E-03 |

|                                                     |      |     |        |   |       |          |
|-----------------------------------------------------|------|-----|--------|---|-------|----------|
| receptor complex (GO:0043235)                       | 553  | 11  | 35.99  | - | .31   | 4.47E-03 |
| organellar ribosome (GO:0000313)                    | 90   | 21  | 5.86   | + | 3.59  | 5.08E-03 |
| mitochondrial ribosome (GO:0005761)                 | 90   | 21  | 5.86   | + | 3.59  | 5.08E-03 |
| protein-DNA complex (GO:0032993)                    | 192  | 33  | 12.50  | + | 2.64  | 5.22E-03 |
| chaperonin-containing T-complex (GO:0005832)        | 11   | 8   | .72    | + | 11.17 | 1.24E-02 |
| synapse (GO:0045202)                                | 1360 | 50  | 88.51  | - | .56   | 1.82E-02 |
| Sm-like protein family complex (GO:0120114)         | 83   | 19  | 5.40   | + | 3.52  | 1.86E-02 |
| outer kinetochore (GO:0000940)                      | 12   | 8   | .78    | + | 10.24 | 1.95E-02 |
| anchoring junction (GO:0070161)                     | 1336 | 49  | 86.95  | - | .56   | 2.02E-02 |
| methyltransferase complex (GO:0034708)              | 93   | 20  | 6.05   | + | 3.30  | 2.45E-02 |
| spindle microtubule (GO:0005876)                    | 87   | 19  | 5.66   | + | 3.36  | 3.29E-02 |
| cytoplasmic vesicle membrane (GO:0030659)           | 1196 | 43  | 77.84  | - | .55   | 3.69E-02 |
| U2-type catalytic step 2 spliceosome (GO:0071007)   | 30   | 11  | 1.95   | + | 5.63  | 3.87E-02 |
| respiratory chain complex (GO:0098803)              | 89   | 19  | 5.79   | + | 3.28  | 4.32E-02 |
| small nuclear ribonucleoprotein cmplex (GO:0030532) | 73   | 17  | 4.75   | + | 3.58  | 4.38E-02 |
| intracellular vesicle (GO:0097708)                  | 2496 | 113 | 162.45 | - | .70   | 4.48E-02 |
