# Supplementary material for: RNA Sequencing in Hypoxia-Adapted T98G Glioblastoma Cells Provides Supportive Evidence for IRE1 as a Potential Therapeutic Target
Source: Genes (Basel). 2023 Mar 31;14(4):841. doi: 10.3390/genes14040841 (PMC10138146; doi:10.3390/genes14040841)
Supplement: Supplementary file 1 [file genes-14-00841-s001.zip]

Archive with 11 entries (11 files):
- S1 Table RNAseq QC results.pdf
- S10 Table GBM T98G Panther GO Reactome all up in normoxia sort by p value.pdf
- S11 table DrugBank p01 up in hypoxia gene targets.pdf
- S2 Table GBM T98G All DEGs at p 05 with negative log2foldchange as hypoxia upregulated.pdf
- S3 Table GBM T98G All DEGs upregulated in hypoxia by p value.pdf
- S4 Table GBM T98G All DEGs upregulated by normoxia sorted by p value.pdf
- S5 table GBM T98G Panther GO cell comp all up in hypoxia sort by pvalue.pdf
- S6 Table GBM T98G Panther GO cell comp bonferoni all  up in hypox sort by enrichment.pdf
- S7 Table GBM T98G Panther GO Reactome all up in hypoxia sort by pvalue.pdf
- S8 Table GBM T98G Panther GO bio process all up in Normoxia sort by p value.pdf
- S9 Table GBM T98G Panther GO cell comp all up in normoxia sort by pvalue.pdf
